# Supplementary material for: Proteomic analysis of differential anther development from sterile/fertile lines in Capsicum annuum L
Source: PeerJ. 2022 May 27;10:e13168. doi: 10.7717/peerj.13168 (PMC9150696; doi:10.7717/peerj.13168)
Supplement: Supplemental Information 3 [file peerj-10-13168-s003.xlsx]

## Sheet: Table S1
Protein accession	Protein description	Gene name	MW [kDa]	BY_JS_1	BY_JS_2	BY_JS_3	KY_JS_1	KY_JS_2	KY_JS_3	BY_SF_1	BY_SF_2	BY_SF_3	KY_SF_1	KY_SF_2	KY_SF_3	BY_SH_1	BY_SH_2	BY_SH_3	KY_SH_1	KY_SH_2	KY_SH_3	BY_JS/KY_JS Ratio	BY_JS/KY_JS P value	BY_SF/KY_SF Ratio	BY_SF/KY_SF P value	BY_SH/KY_SH Ratio	BY_SH/KY_SH P value	Subcellular localization	KEGG KO No.	KEGG Gene	KEGG pathway	Biological Process	Cellular Component	Molecular Function	Pfam ID	Domain description	KOG category	KOG NO.	KOG description
J7H3N5	Photosystem II protein D1 OS=Capsicum annuum OX=4072 GN=psbA PE=3 SV=1	psbA	38.9	1.009	1.048	1.012	0.963	0.99	0.987	0.984	1.017	1.004	0.98	1.009	1.004							1.044	0.0460014	1.004	0.776903			plasma membrane	K02703	psbA; photosystem II P680 reaction center D1 protein [EC:1.10.3.9]	map00195 Photosynthesis; map01100 Metabolic pathways		GO:0005622 intracellular; GO:0005623 cell; GO:0005737 cytoplasm; GO:0009507 chloroplast; GO:0009532 plastid stroma; GO:0009534 chloroplast thylakoid; GO:0009535 chloroplast thylakoid membrane; GO:0009536 plastid; GO:0009570 chloroplast stroma; GO:0009579 thylakoid; GO:0010287 plastoglobule; GO:0016020 membrane; GO:0031976 plastid thylakoid; GO:0031984 organelle subcompartment; GO:0034357 photosyn…	GO:0005488 binding; GO:0016168 chlorophyll binding; GO:0043167 ion binding; GO:0043168 anion binding; GO:0046906 tetrapyrrole binding; GO:0048037 cofactor binding; GO:0097159 organic cyclic compound binding; GO:1901363 heterocyclic compound binding;
A0A2G2Z5P6	Adenylyltransferase and sulfurtransferase MOCS3 OS=Capsicum annuum OX=4072 GN=MOCS3 PE=3 SV=1	MOCS3	49.7	0.98	0.972	0.968	1.031	1.018	1.035	1.011	1.056	1.042	0.948	0.987	0.997	0.881	0.87	0.873	1.098	1.115	1.154	0.947	0.00090098	1.06	0.0430923	0.779	8.06194e-05	cytoplasm	K11996	MOCS3, UBA4; adenylyltransferase and sulfurtransferase [EC:2.7.7.80 2.8.1.11]	map04122 Sulfur relay system		GO:0005622 intracellular; GO:0005623 cell; GO:0005737 cytoplasm;	GO:0003824 catalytic activity; GO:0008265 Mo-molybdopterin cofactor sulfurase activity; GO:0016740 transferase activity; GO:0016782 transferase activity, transferring sulfur-containing groups; GO:0016783 sulfurtransferase activity;	PF00899; PF00581	ThiF family; Rhodanese-like domain	H	KOG2017	Molybdopterin synthase sulfurylase
A0A1U8FN75	Pyrophosphate--fructose 6-phosphate 1-phosphotransferase subunit beta OS=Capsicum annuum OX=4072 GN=PFP-BETA PE=3 SV=1	PFP-BETA	61.7	0.973	0.974	0.963	1.031	1.042	1.017	0.991	0.995	0.974	1.045	1.008	1.03	1.02	1.038	0.986	1.003	0.986	0.986	0.942	0.00162157	0.96	0.0301791	1.023	0.231426	chloroplast	K00895	pfp, PFP; diphosphate-dependent phosphofructokinase [EC:2.7.1.90]	map00010 Glycolysis / Gluconeogenesis; map00030 Pentose phosphate pathway; map00051 Fructose and mannose metabolism; map01100 Metabolic pathways; map01110 Biosynthesis of secondary metabolites	GO:0000003 reproduction; GO:0003006 developmental process involved in reproduction; GO:0005975 carbohydrate metabolic process; GO:0006793 phosphorus metabolic process; GO:0006796 phosphate-containing compound metabolic process; GO:0007275 multicellular organism development; GO:0008152 metabolic process; GO:0009719 response to endogenous stimulus; GO:0009725 response to hormone; GO:0009735 respons…	GO:0005618 cell wall; GO:0005622 intracellular; GO:0005623 cell; GO:0005737 cytoplasm; GO:0005829 cytosol; GO:0016020 membrane; GO:0030312 external encapsulating structure; GO:0071944 cell periphery;	GO:0003824 catalytic activity; GO:0008443 phosphofructokinase activity; GO:0016301 kinase activity; GO:0016740 transferase activity; GO:0016772 transferase activity, transferring phosphorus-containing groups; GO:0016773 phosphotransferase activity, alcohol group as acceptor; GO:0019200 carbohydrate kinase activity; GO:0047334 diphosphate-fructose-6-phosphate 1-phosphotransferase activity;	PF00365	Phosphofructokinase	G	KOG2440	Pyrophosphate-dependent phosphofructo-1-kinase
B9VRK9	Peroxidase OS=Capsicum annuum OX=4072 GN=POD PE=2 SV=1	POD	34.9	1.076	0.994	0.976	0.958	0.972	1.03							1.286	1.236	1.244	0.742	0.715	0.795	1.029	0.490558			1.672	0.00010342	chloroplast	K00430	E1.11.1.7; peroxidase [EC:1.11.1.7]	map00940 Phenylpropanoid biosynthesis; map01100 Metabolic pathways; map01110 Biosynthesis of secondary metabolites				PF00141	Peroxidase
A0A1U8F3J4	ATP-dependent 6-phosphofructokinase OS=Capsicum annuum OX=4072 GN=PFK PE=3 SV=1	PFK	52.8	1.038	1.043	1.005	0.976	0.967	0.974	1.015	1.043	0.982	1.019	0.992	0.974	0.966	0.986	0.964	1.026	1.025	1.065	1.058	0.00939312	1.018	0.452617	0.936	0.0103136	cytoskeleton	K00850	pfkA, PFK; 6-phosphofructokinase 1 [EC:2.7.1.11]	map00010 Glycolysis / Gluconeogenesis; map00030 Pentose phosphate pathway; map00051 Fructose and mannose metabolism; map00052 Galactose metabolism; map01100 Metabolic pathways; map01110 Biosynthesis of secondary metabolites; map01200 Carbon metabolism; map01230 Biosynthesis of amino acids; map03018 RNA degradation	GO:0005975 carbohydrate metabolic process; GO:0006082 organic acid metabolic process; GO:0006090 pyruvate metabolic process; GO:0006091 generation of precursor metabolites and energy; GO:0006096 glycolytic process; GO:0006139 nucleobase-containing compound metabolic process; GO:0006163 purine nucleotide metabolic process; GO:0006164 purine nucleotide biosynthetic process; GO:0006165 nucleoside di…	GO:0005622 intracellular; GO:0005623 cell; GO:0005737 cytoplasm; GO:0005829 cytosol;	GO:0003824 catalytic activity; GO:0003872 6-phosphofructokinase activity; GO:0008443 phosphofructokinase activity; GO:0016301 kinase activity; GO:0016740 transferase activity; GO:0016772 transferase activity, transferring phosphorus-containing groups; GO:0016773 phosphotransferase activity, alcohol group as acceptor; GO:0019200 carbohydrate kinase activity;	PF00365	Phosphofructokinase	G	KOG2440	Pyrophosphate-dependent phosphofructo-1-kinase
A0A2G2ZX77	ATP-dependent 6-phosphofructokinase OS=Capsicum annuum OX=4072 GN=PFK PE=3 SV=1	PFK	58.9	0.963	1.018	0.92	1.043	1.066	0.967	0.992	0.98	0.962	1.017	1.017	1.02	1.01	0.952	0.99	1.048	1.029	1.019	0.943	0.231734	0.961	0.0110606	0.953	0.0674426	mitochondria	K00850	pfkA, PFK; 6-phosphofructokinase 1 [EC:2.7.1.11]	map00010 Glycolysis / Gluconeogenesis; map00030 Pentose phosphate pathway; map00051 Fructose and mannose metabolism; map00052 Galactose metabolism; map01100 Metabolic pathways; map01110 Biosynthesis of secondary metabolites; map01200 Carbon metabolism; map01230 Biosynthesis of amino acids; map03018 RNA degradation	GO:0005975 carbohydrate metabolic process; GO:0006082 organic acid metabolic process; GO:0006090 pyruvate metabolic process; GO:0006091 generation of precursor metabolites and energy; GO:0006096 glycolytic process; GO:0006139 nucleobase-containing compound metabolic process; GO:0006163 purine nucleotide metabolic process; GO:0006164 purine nucleotide biosynthetic process; GO:0006165 nucleoside di…	GO:0005622 intracellular; GO:0005623 cell; GO:0005737 cytoplasm; GO:0009507 chloroplast; GO:0009536 plastid; GO:0043226 organelle; GO:0043227 membrane-bounded organelle; GO:0043229 intracellular organelle; GO:0043231 intracellular membrane-bounded organelle;	GO:0003824 catalytic activity; GO:0003872 6-phosphofructokinase activity; GO:0008443 phosphofructokinase activity; GO:0016301 kinase activity; GO:0016740 transferase activity; GO:0016772 transferase activity, transferring phosphorus-containing groups; GO:0016773 phosphotransferase activity, alcohol group as acceptor; GO:0019200 carbohydrate kinase activity;	PF00365	Phosphofructokinase	G	KOG2440	Pyrophosphate-dependent phosphofructo-1-kinase
B5LAU2	NADPH--cytochrome P450 reductase OS=Capsicum annuum OX=4072 GN=cpr1 PE=2 SV=1	cpr1	76	1.075	1.117	1.073	0.935	0.922	0.909	0.966	0.962	0.974	1.028	1.034	1.076	0.923	0.903	0.902	1.1	1.092	1.062	1.18	0.000424712	0.925	0.00620741	0.838	0.000175081	chloroplast	K00327	POR; NADPH-ferrihemoprotein reductase [EC:1.6.2.4]		GO:0001101 response to acid chemical; GO:0006725 cellular aromatic compound metabolic process; GO:0006950 response to stress; GO:0006979 response to oxidative stress; GO:0008152 metabolic process; GO:0009698 phenylpropanoid metabolic process; GO:0009719 response to endogenous stimulus; GO:0009725 response to hormone; GO:0009737 response to abscisic acid; GO:0009987 cellular process; GO:0010033 re…	GO:0005622 intracellular; GO:0005623 cell; GO:0005737 cytoplasm; GO:0005783 endoplasmic reticulum; GO:0005829 cytosol; GO:0012505 endomembrane system; GO:0043226 organelle; GO:0043227 membrane-bounded organelle; GO:0043229 intracellular organelle; GO:0043231 intracellular membrane-bounded organelle;	GO:0003824 catalytic activity; GO:0003958 NADPH-hemoprotein reductase activity; GO:0016491 oxidoreductase activity; GO:0016651 oxidoreductase activity, acting on NAD(P)H; GO:0016653 oxidoreductase activity, acting on NAD(P)H, heme protein as acceptor;	PF00258; PF00667; PF00175	Flavodoxin; FAD binding domain; Oxidoreductase NAD-binding domain	C	KOG1158	NADP/FAD dependent oxidoreductase
A0A2G2XYH5	Flap endonuclease 1 OS=Capsicum annuum OX=4072 GN=FEN1 PE=3 SV=1	FEN1	72.7	1.08	1.082	1.063	0.933	0.925	0.917	0.993	1.021	0.954	1.02	1.018	0.978	0.992	1.019	1.058	0.956	0.946	0.94	1.162	3.69989e-05	0.984	0.535574	1.08	0.0166611	plasma membrane	K04799	FEN1, RAD2; flap endonuclease-1 [EC:3.-.-.-]	map03030 DNA replication; map03410 Base excision repair; map03450 Non-homologous end-joining		GO:0005622 intracellular; GO:0005623 cell; GO:0005634 nucleus; GO:0005730 nucleolus; GO:0031974 membrane-enclosed lumen; GO:0031981 nuclear lumen; GO:0043226 organelle; GO:0043227 membrane-bounded organelle; GO:0043228 non-membrane-bounded organelle; GO:0043229 intracellular organelle; GO:0043231 intracellular membrane-bounded organelle; GO:0043232 intracellular non-membrane-bounded organelle; GO…		PF00190	Cupin	L	KOG2519	5'-3' exonuclease
A0A1U8EYR8	ATP-dependent 6-phosphofructokinase OS=Capsicum annuum OX=4072 GN=PFK PE=3 SV=1	PFK	58.7	0.986	1.033	0.928	1.089	0.978	1.061	0.972	0.995	1.023	0.98	0.996	0.997	1.047	1.108	1.067	0.905	0.963	0.936	0.942	0.2551	1.006	0.744627	1.149	0.0047488	chloroplast	K00850	pfkA, PFK; 6-phosphofructokinase 1 [EC:2.7.1.11]	map00010 Glycolysis / Gluconeogenesis; map00030 Pentose phosphate pathway; map00051 Fructose and mannose metabolism; map00052 Galactose metabolism; map01100 Metabolic pathways; map01110 Biosynthesis of secondary metabolites; map01200 Carbon metabolism; map01230 Biosynthesis of amino acids; map03018 RNA degradation	GO:0005975 carbohydrate metabolic process; GO:0006082 organic acid metabolic process; GO:0006090 pyruvate metabolic process; GO:0006091 generation of precursor metabolites and energy; GO:0006096 glycolytic process; GO:0006139 nucleobase-containing compound metabolic process; GO:0006163 purine nucleotide metabolic process; GO:0006164 purine nucleotide biosynthetic process; GO:0006165 nucleoside di…	GO:0005622 intracellular; GO:0005623 cell; GO:0005737 cytoplasm; GO:0009507 chloroplast; GO:0009536 plastid; GO:0043226 organelle; GO:0043227 membrane-bounded organelle; GO:0043229 intracellular organelle; GO:0043231 intracellular membrane-bounded organelle;	GO:0003824 catalytic activity; GO:0003872 6-phosphofructokinase activity; GO:0008443 phosphofructokinase activity; GO:0016301 kinase activity; GO:0016740 transferase activity; GO:0016772 transferase activity, transferring phosphorus-containing groups; GO:0016773 phosphotransferase activity, alcohol group as acceptor; GO:0019200 carbohydrate kinase activity;	PF00365	Phosphofructokinase	G	KOG2440	Pyrophosphate-dependent phosphofructo-1-kinase
A0A1U8GLB3	ATP-dependent 6-phosphofructokinase OS=Capsicum annuum OX=4072 GN=PFK PE=3 SV=1	PFK	58.2	0.98	0.974	0.987	1.03	1.006	1.03	0.955	0.959	0.996	1.025	0.993	1.04	1.002	1.048	1.066	0.975	0.976	0.942	0.959	0.00893447	0.952	0.0603254	1.077	0.0274951	chloroplast	K00850	pfkA, PFK; 6-phosphofructokinase 1 [EC:2.7.1.11]	map00010 Glycolysis / Gluconeogenesis; map00030 Pentose phosphate pathway; map00051 Fructose and mannose metabolism; map00052 Galactose metabolism; map01100 Metabolic pathways; map01110 Biosynthesis of secondary metabolites; map01200 Carbon metabolism; map01230 Biosynthesis of amino acids; map03018 RNA degradation	GO:0005975 carbohydrate metabolic process; GO:0006082 organic acid metabolic process; GO:0006090 pyruvate metabolic process; GO:0006091 generation of precursor metabolites and energy; GO:0006096 glycolytic process; GO:0006139 nucleobase-containing compound metabolic process; GO:0006163 purine nucleotide metabolic process; GO:0006164 purine nucleotide biosynthetic process; GO:0006165 nucleoside di…	GO:0005622 intracellular; GO:0005623 cell; GO:0005737 cytoplasm; GO:0009507 chloroplast; GO:0009536 plastid; GO:0043226 organelle; GO:0043227 membrane-bounded organelle; GO:0043229 intracellular organelle; GO:0043231 intracellular membrane-bounded organelle;	GO:0003824 catalytic activity; GO:0003872 6-phosphofructokinase activity; GO:0008443 phosphofructokinase activity; GO:0016301 kinase activity; GO:0016740 transferase activity; GO:0016772 transferase activity, transferring phosphorus-containing groups; GO:0016773 phosphotransferase activity, alcohol group as acceptor; GO:0019200 carbohydrate kinase activity;	PF00365	Phosphofructokinase	G	KOG2440	Pyrophosphate-dependent phosphofructo-1-kinase
A0A2G2Z4W0	Ribokinase OS=Capsicum annuum OX=4072 GN=T459_20516 PE=3 SV=1	T459_20516	42.3	1.041	1.04	1.02	0.976	0.96	0.975	1.023	1.055	1.017	0.965	0.968	0.949	1.052	1.086	1.077	0.946	0.948	0.928	1.065	0.00176471	1.074	0.00530792	1.139	0.000368585	cytoplasm	K00852	rbsK, RBKS; ribokinase [EC:2.7.1.15]	map00030 Pentose phosphate pathway; map01100 Metabolic pathways	GO:0005975 carbohydrate metabolic process; GO:0006793 phosphorus metabolic process; GO:0006796 phosphate-containing compound metabolic process; GO:0008152 metabolic process; GO:0009987 cellular process; GO:0016310 phosphorylation; GO:0044237 cellular metabolic process; GO:0044238 primary metabolic process; GO:0044262 cellular carbohydrate metabolic process; GO:0046835 carbohydrate phosphorylation…	GO:0005622 intracellular; GO:0005623 cell; GO:0005737 cytoplasm; GO:0005829 cytosol;	GO:0003824 catalytic activity; GO:0016301 kinase activity; GO:0016740 transferase activity; GO:0016772 transferase activity, transferring phosphorus-containing groups; GO:0019200 carbohydrate kinase activity;			G	KOG2855	Ribokinase
A0A2G3A0H6	Alanine--tRNA ligase OS=Capsicum annuum OX=4072 GN=T459_09845 PE=3 SV=1	T459_09845	201.8	1.133	1.134	1.101	0.872	0.913	0.884	0.923	0.9	0.938	1.086	1.082	1.073	0.809	0.795	0.818	1.223	1.176	1.196	1.262	0.000154636	0.852	0.000215898	0.674	9.5652e-06	plasma membrane	K01872	AARS, alaS; alanyl-tRNA synthetase [EC:6.1.1.7]	map00970 Aminoacyl-tRNA biosynthesis	GO:0006082 organic acid metabolic process; GO:0006139 nucleobase-containing compound metabolic process; GO:0006396 RNA processing; GO:0006399 tRNA metabolic process; GO:0006400 tRNA modification; GO:0006412 translation; GO:0006418 tRNA aminoacylation for protein translation; GO:0006419 alanyl-tRNA aminoacylation; GO:0006518 peptide metabolic process; GO:0006520 cellular amino acid metabolic proce…	GO:0005622 intracellular; GO:0005623 cell; GO:0005737 cytoplasm; GO:0005739 mitochondrion; GO:0005829 cytosol; GO:0009507 chloroplast; GO:0009536 plastid; GO:0043226 organelle; GO:0043227 membrane-bounded organelle; GO:0043229 intracellular organelle; GO:0043231 intracellular membrane-bounded organelle;	GO:0000049 tRNA binding; GO:0003676 nucleic acid binding; GO:0003723 RNA binding; GO:0003824 catalytic activity; GO:0004812 aminoacyl-tRNA ligase activity; GO:0004813 alanine-tRNA ligase activity; GO:0005488 binding; GO:0016597 amino acid binding; GO:0016874 ligase activity; GO:0016875 ligase activity, forming carbon-oxygen bonds; GO:0031406 carboxylic acid binding; GO:0036094 small molecule bind…	PF07973	Threonyl and Alanyl tRNA synthetase second additional domain	J	KOG0188	Alanyl-tRNA synthetase
A0A1U8HCP1	Probable bifunctional methylthioribulose-1-phosphate dehydratase/enolase-phosphatase E1 OS=Capsicum annuum OX=4072 GN=T459_20627 PE=3 SV=1	T459_20627	56.3	1.032	1.011	0.951	0.995	0.969	1	1.019	1.056	1.012	1.015	1.016	1.006	0.986	0.98	0.958	1.032	1.041	1.019	1.01	0.7356	1.016	0.29907	0.946	0.00648624	chloroplast	K16054	DEP1; methylthioribulose 1-phosphate dehydratase / enolase-phosphatase E1 [EC:4.2.1.109 3.1.3.77]	map00270 Cysteine and methionine metabolism; map01100 Metabolic pathways		GO:0005622 intracellular; GO:0005623 cell; GO:0005737 cytoplasm; GO:0005829 cytosol; GO:0009507 chloroplast; GO:0009532 plastid stroma; GO:0009536 plastid; GO:0009570 chloroplast stroma; GO:0043226 organelle; GO:0043227 membrane-bounded organelle; GO:0043229 intracellular organelle; GO:0043231 intracellular membrane-bounded organelle;		PF00596; PF00702	Class II Aldolase and Adducin N-terminal domain; haloacid dehalogenase-like hydrolase	E	KOG2631	Class II aldolase/adducin N-terminal domain protein
A0A2G2Y361	Phosphatidylserine decarboxylase proenzyme 2 OS=Capsicum annuum OX=4072 GN=PSD2 PE=3 SV=1	PSD2	71.9	1.189	1.105	1.148	0.846	0.862	0.868	0.894	0.964	0.93	1.044	1.084	1.087	0.819	0.831	0.853	1.132	1.195	1.171	1.336	0.000210706	0.867	0.00489635	0.716	7.15753e-05	nucleus	K01613	psd, PISD; phosphatidylserine decarboxylase [EC:4.1.1.65]	map00564 Glycerophospholipid metabolism; map01100 Metabolic pathways; map01110 Biosynthesis of secondary metabolites				PF00168; PF13833	C2 domain; EF-hand domain pair	I	KOG2419	Phosphatidylserine decarboxylase
A0A1U8EYL5	Peroxidase OS=Capsicum annuum OX=4072 GN=T459_29363 PE=3 SV=1	T459_29363	37.8	0.95	0.976	0.96	1.046	1.034	1.044	1.01	0.969	0.958	1.021	1.023	1.022	1.051	1.117	1.039	0.944	0.932	0.946	0.924	0.000780201	0.958	0.0545868	1.136	0.00514338	chloroplast	K00430	E1.11.1.7; peroxidase [EC:1.11.1.7]	map00940 Phenylpropanoid biosynthesis; map01100 Metabolic pathways; map01110 Biosynthesis of secondary metabolites	GO:0000003 reproduction; GO:0003006 developmental process involved in reproduction; GO:0006725 cellular aromatic compound metabolic process; GO:0007275 multicellular organism development; GO:0008152 metabolic process; GO:0009058 biosynthetic process; GO:0009698 phenylpropanoid metabolic process; GO:0009699 phenylpropanoid biosynthetic process; GO:0009791 post-embryonic development; GO:0009808 lig…	GO:0005618 cell wall; GO:0005622 intracellular; GO:0005623 cell; GO:0005737 cytoplasm; GO:0005829 cytosol; GO:0009505 plant-type cell wall; GO:0030312 external encapsulating structure; GO:0071944 cell periphery;		PF00141	Peroxidase
A0A2G2YQV3	Arginine biosynthesis bifunctional protein ArgJ, chloroplastic OS=Capsicum annuum OX=4072 GN=T459_22913 PE=3 SV=1	T459_22913	52.7	0.963	0.952	0.948	1.038	1.041	1.02	0.995	0.992	0.97	1.004	1.046	1.027	1.009	1.064	1.114	0.932	0.967	0.914	0.924	0.000559113	0.961	0.0501394	1.133	0.0197358	chloroplast	K00620	argJ; glutamate N-acetyltransferase / amino-acid N-acetyltransferase [EC:2.3.1.35 2.3.1.1]	map00220 Arginine biosynthesis; map01100 Metabolic pathways; map01110 Biosynthesis of secondary metabolites; map01210 2-Oxocarboxylic acid metabolism; map01230 Biosynthesis of amino acids	GO:0006082 organic acid metabolic process; GO:0006520 cellular amino acid metabolic process; GO:0006525 arginine metabolic process; GO:0006526 arginine biosynthetic process; GO:0006591 ornithine metabolic process; GO:0006592 ornithine biosynthetic process; GO:0006807 nitrogen compound metabolic process; GO:0008152 metabolic process; GO:0008652 cellular amino acid biosynthetic process; GO:0009058 …	GO:0005622 intracellular; GO:0005623 cell; GO:0005737 cytoplasm; GO:0009507 chloroplast; GO:0009532 plastid stroma; GO:0009536 plastid; GO:0009570 chloroplast stroma; GO:0043226 organelle; GO:0043227 membrane-bounded organelle; GO:0043229 intracellular organelle; GO:0043231 intracellular membrane-bounded organelle;	GO:0003824 catalytic activity; GO:0004042 acetyl-CoA:L-glutamate N-acetyltransferase activity; GO:0004358 glutamate N-acetyltransferase activity; GO:0008080 N-acetyltransferase activity; GO:0016407 acetyltransferase activity; GO:0016410 N-acyltransferase activity; GO:0016740 transferase activity; GO:0016746 transferase activity, transferring acyl groups; GO:0016747 transferase activity, transferr…			E	KOG2786	Putative glutamate/ornithine acetyltransferase
A0A2G3AAA8	Adenylosuccinate synthetase, chloroplastic OS=Capsicum annuum OX=4072 GN=PURA PE=3 SV=1	PURA	55.4	1.004	0.959	0.95	1.022	1.034	1.019	1.026	1.021	1.009	0.974	0.964	0.98	1.071	1.082	1.055	0.919	0.966	0.921	0.947	0.0368577	1.047	0.00259252	1.143	0.00168157	chloroplast	K01939	purA, ADSS; adenylosuccinate synthase [EC:6.3.4.4]	map00230 Purine metabolism; map00250 Alanine, aspartate and glutamate metabolism; map01100 Metabolic pathways	GO:0006139 nucleobase-containing compound metabolic process; GO:0006163 purine nucleotide metabolic process; GO:0006164 purine nucleotide biosynthetic process; GO:0006167 AMP biosynthetic process; GO:0006725 cellular aromatic compound metabolic process; GO:0006753 nucleoside phosphate metabolic process; GO:0006793 phosphorus metabolic process; GO:0006796 phosphate-containing compound metabolic pr…	GO:0005576 extracellular region; GO:0005622 intracellular; GO:0005623 cell; GO:0005737 cytoplasm; GO:0009507 chloroplast; GO:0009532 plastid stroma; GO:0009536 plastid; GO:0009570 chloroplast stroma; GO:0043226 organelle; GO:0043227 membrane-bounded organelle; GO:0043229 intracellular organelle; GO:0043231 intracellular membrane-bounded organelle; GO:0048046 apoplast;	GO:0003824 catalytic activity; GO:0004019 adenylosuccinate synthase activity; GO:0016874 ligase activity; GO:0016879 ligase activity, forming carbon-nitrogen bonds;	PF00709	Adenylosuccinate synthetase	F	KOG1355	Adenylosuccinate synthase
A0A2G2YNP0	Adenylosuccinate synthetase, chloroplastic OS=Capsicum annuum OX=4072 GN=PURA PE=3 SV=1	PURA	55.4	0.958	1.01	0.959	1.036	1.048	1.009	1.047	0.946	1.017	1.019	0.981	0.932	1.114	1.09	1.048	0.925	0.892	0.926	0.946	0.0559487	1.027	0.54825	1.186	0.00142963	chloroplast	K01939	purA, ADSS; adenylosuccinate synthase [EC:6.3.4.4]	map00230 Purine metabolism; map00250 Alanine, aspartate and glutamate metabolism; map01100 Metabolic pathways	GO:0006139 nucleobase-containing compound metabolic process; GO:0006163 purine nucleotide metabolic process; GO:0006164 purine nucleotide biosynthetic process; GO:0006167 AMP biosynthetic process; GO:0006725 cellular aromatic compound metabolic process; GO:0006753 nucleoside phosphate metabolic process; GO:0006793 phosphorus metabolic process; GO:0006796 phosphate-containing compound metabolic pr…	GO:0005576 extracellular region; GO:0005622 intracellular; GO:0005623 cell; GO:0005737 cytoplasm; GO:0009507 chloroplast; GO:0009532 plastid stroma; GO:0009536 plastid; GO:0009570 chloroplast stroma; GO:0043226 organelle; GO:0043227 membrane-bounded organelle; GO:0043229 intracellular organelle; GO:0043231 intracellular membrane-bounded organelle; GO:0048046 apoplast;	GO:0003824 catalytic activity; GO:0004019 adenylosuccinate synthase activity; GO:0016874 ligase activity; GO:0016879 ligase activity, forming carbon-nitrogen bonds;	PF00709	Adenylosuccinate synthetase	F	KOG1355	Adenylosuccinate synthase
A0A2G2ZSU7	Catalase OS=Capsicum annuum OX=4072 GN=T459_13488 PE=3 SV=1	T459_13488	56.5	0.936	0.903	0.926	1.073	1.054	1.066	0.981	0.972	0.999	0.963	1.019	1.068	0.828	0.863	0.906	1.163	1.127	1.163	0.866	0.000262887	0.968	0.362298	0.752	0.000525013	peroxisome	K03781	katE, CAT, catB, srpA; catalase [EC:1.11.1.6]	map00380 Tryptophan metabolism; map00630 Glyoxylate and dicarboxylate metabolism; map01100 Metabolic pathways; map01110 Biosynthesis of secondary metabolites; map01200 Carbon metabolism; map04016 MAPK signaling pathway - plant; map04146 Peroxisome				PF00199	Catalase	P	KOG0047	Catalase
J7H3S6	Photosystem II D2 protein OS=Capsicum annuum OX=4072 GN=psbD PE=3 SV=1	psbD	39.5	0.995	1.041	1.041	0.916	1.012	0.933	0.999	1	1.024	1.011	1	0.968	1.074	1.079	1.089	0.907	0.958	0.878	1.075	0.0975574	1.015	0.390519	1.182	0.00287217	cytoplasm	K02706	psbD; photosystem II P680 reaction center D2 protein [EC:1.10.3.9]	map00195 Photosynthesis; map01100 Metabolic pathways		GO:0005622 intracellular; GO:0005623 cell; GO:0005737 cytoplasm; GO:0009507 chloroplast; GO:0009532 plastid stroma; GO:0009534 chloroplast thylakoid; GO:0009535 chloroplast thylakoid membrane; GO:0009536 plastid; GO:0009570 chloroplast stroma; GO:0009579 thylakoid; GO:0010287 plastoglobule; GO:0016020 membrane; GO:0031976 plastid thylakoid; GO:0031984 organelle subcompartment; GO:0034357 photosyn…
A0A1U8GAT0	Calcium-dependent protein kinase isoform 2 OS=Capsicum annuum OX=4072 GN=T459_08476 PE=4 SV=1	T459_08476	58.8	1.096	1.05	1.09	0.918	0.93	0.92	0.942	0.924	0.942	1.056	1.056	0.995	0.901	0.936	0.902	1.166	0.989	1.112	1.169	0.000374561	0.904	0.00842324	0.838	0.0261402	mitochondria	K13412	CPK; calcium-dependent protein kinase [EC:2.7.11.1]	map04626 Plant-pathogen interaction	GO:0001101 response to acid chemical; GO:0006464 cellular protein modification process; GO:0006468 protein phosphorylation; GO:0006793 phosphorus metabolic process; GO:0006796 phosphate-containing compound metabolic process; GO:0006807 nitrogen compound metabolic process; GO:0007154 cell communication; GO:0007165 signal transduction; GO:0008152 metabolic process; GO:0009719 response to endogenous…	GO:0005622 intracellular; GO:0005623 cell; GO:0005634 nucleus; GO:0005737 cytoplasm; GO:0005886 plasma membrane; GO:0016020 membrane; GO:0043226 organelle; GO:0043227 membrane-bounded organelle; GO:0043229 intracellular organelle; GO:0043231 intracellular membrane-bounded organelle; GO:0071944 cell periphery;	GO:0003824 catalytic activity; GO:0004672 protein kinase activity; GO:0004674 protein serine/threonine kinase activity; GO:0004683 calmodulin-dependent protein kinase activity; GO:0005488 binding; GO:0005515 protein binding; GO:0005516 calmodulin binding; GO:0009931 calcium-dependent protein serine/threonine kinase activity; GO:0010857 calcium-dependent protein kinase activity; GO:0016301 kinase …	PF00069; PF13499	Protein kinase domain; EF-hand domain pair	T	KOG0032	Ca2+/calmodulin-dependent protein kinase, EF-Hand protein superfamily
A0A2G2ZHK9	Vesicle transport protein OS=Capsicum annuum OX=4072 GN=T459_14430 PE=3 SV=1	T459_14430	19.6	1.065	0.982	0.982	1.028	0.969	0.98													1.017	0.630891					vacuolar membrane				GO:0006810 transport; GO:0016192 vesicle-mediated transport; GO:0051179 localization; GO:0051234 establishment of localization;	GO:0016020 membrane;				U	KOG2887	Membrane protein involved in ER to Golgi transport
A0A1U8F770	6,7-dimethyl-8-ribityllumazine synthase OS=Capsicum annuum OX=4072 GN=T459_31204 PE=3 SV=1	T459_31204	24.7	1.031	1.003	0.968	1.01	0.987	0.999	1.054	1.1	1.069	0.881	0.944	0.943	0.984	0.976	1.046	1.02	1.036	0.946	1.002	0.933994	1.164	0.00425844	1.001	0.965615	chloroplast	K00794	ribH, RIB4; 6,7-dimethyl-8-ribityllumazine synthase [EC:2.5.1.78]	map00740 Riboflavin metabolism; map01100 Metabolic pathways; map01110 Biosynthesis of secondary metabolites		GO:0005622 intracellular; GO:0005623 cell; GO:0005737 cytoplasm; GO:0009507 chloroplast; GO:0009532 plastid stroma; GO:0009536 plastid; GO:0009570 chloroplast stroma; GO:0043226 organelle; GO:0043227 membrane-bounded organelle; GO:0043229 intracellular organelle; GO:0043231 intracellular membrane-bounded organelle;		PF00885	6,7-dimethyl-8-ribityllumazine synthase	H	KOG3243	6,7-dimethyl-8-ribityllumazine synthase
A0A2G2Z3B6	Aconitate hydratase, cytoplasmic OS=Capsicum annuum OX=4072 GN=T459_19966 PE=4 SV=1	T459_19966	31.6	0.989	0.984	0.917	1.052	1.061	1.051	0.971	0.964	0.974	1.045	1.044	0.988	1.014	0.966	0.996	1.006	0.993	1.024	0.913	0.0206758	0.945	0.0411258	0.984	0.398636	cytoplasm	K01681	ACO, acnA; aconitate hydratase [EC:4.2.1.3]	map00020 Citrate cycle (TCA cycle); map00630 Glyoxylate and dicarboxylate metabolism; map01100 Metabolic pathways; map01110 Biosynthesis of secondary metabolites; map01200 Carbon metabolism; map01210 2-Oxocarboxylic acid metabolism; map01230 Biosynthesis of amino acids	GO:0001101 response to acid chemical; GO:0006082 organic acid metabolic process; GO:0006101 citrate metabolic process; GO:0006102 isocitrate metabolic process; GO:0006950 response to stress; GO:0006970 response to osmotic stress; GO:0006979 response to oxidative stress; GO:0007275 multicellular organism development; GO:0008152 metabolic process; GO:0009605 response to external stimulus; GO:000962…	GO:0005618 cell wall; GO:0005622 intracellular; GO:0005623 cell; GO:0005737 cytoplasm; GO:0005739 mitochondrion; GO:0005773 vacuole; GO:0005774 vacuolar membrane; GO:0005829 cytosol; GO:0009507 chloroplast; GO:0009532 plastid stroma; GO:0009536 plastid; GO:0009570 chloroplast stroma; GO:0016020 membrane; GO:0030312 external encapsulating structure; GO:0031090 organelle membrane; GO:0043226 organe…	GO:0000166 nucleotide binding; GO:0003824 catalytic activity; GO:0003994 aconitate hydratase activity; GO:0005488 binding; GO:0005507 copper ion binding; GO:0005524 ATP binding; GO:0008144 drug binding; GO:0016829 lyase activity; GO:0016835 carbon-oxygen lyase activity; GO:0016836 hydro-lyase activity; GO:0017076 purine nucleotide binding; GO:0030554 adenyl nucleotide binding; GO:0032553 ribonucl…	PF00694	Aconitase C-terminal domain	C	KOG0452	RNA-binding translational regulator IRP (aconitase superfamily)
A0A1U8ELH9	60S ribosomal protein L31 OS=Capsicum annuum OX=4072 GN=T459_26700 PE=4 SV=1	T459_26700	13.8	1.046	1.043	0.984	0.922	0.916	1.097	1.026	1.092	0.988	1.111	0.743	1.05							1.047	0.47475	1.07	0.561942			cytoplasm	K02910	RP-L31e, RPL31; large subunit ribosomal protein L31e	map03010 Ribosome	GO:0002181 cytoplasmic translation; GO:0006412 translation; GO:0006518 peptide metabolic process; GO:0006807 nitrogen compound metabolic process; GO:0008152 metabolic process; GO:0009058 biosynthetic process; GO:0009059 macromolecule biosynthetic process; GO:0009987 cellular process; GO:0010467 gene expression; GO:0019538 protein metabolic process; GO:0034641 cellular nitrogen compound metabolic …	GO:0005618 cell wall; GO:0005622 intracellular; GO:0005623 cell; GO:0005737 cytoplasm; GO:0005829 cytosol; GO:0005840 ribosome; GO:0005844 polysome; GO:0005886 plasma membrane; GO:0005911 cell-cell junction; GO:0009506 plasmodesma; GO:0009507 chloroplast; GO:0009536 plastid; GO:0015934 large ribosomal subunit; GO:0016020 membrane; GO:0022625 cytosolic large ribosomal subunit; GO:0022626 cytosolic…	GO:0003735 structural constituent of ribosome; GO:0005198 structural molecule activity;			J	KOG0893	60S ribosomal protein L31
A0A2G3AGG5	60S ribosomal protein L32 OS=Capsicum annuum OX=4072 GN=T459_01145 PE=4 SV=1	T459_01145	15.6																									chloroplast	K02912	RP-L32e, RPL32; large subunit ribosomal protein L32e	map03010 Ribosome						J	KOG0878	60S ribosomal protein L32
A0A2G3A3G4	ADP,ATP carrier protein OS=Capsicum annuum OX=4072 GN=T459_10849 PE=3 SV=1	T459_10849	72	0.949	1.047	1.022	1.016	1.016	1.007	0.939	1.042	1.043	0.945	0.969	0.966	1.015	0.988	1.007	0.989	1.015	0.993	0.993	0.806073	1.05	0.253274	1.004	0.722454	plasma membrane	K03301	TC.AAA; ATP:ADP antiporter, AAA family		GO:0006810 transport; GO:0006811 ion transport; GO:0006820 anion transport; GO:0006855 drug transmembrane transport; GO:0006862 nucleotide transport; GO:0015711 organic anion transport; GO:0015748 organophosphate ester transport; GO:0015865 purine nucleotide transport; GO:0015866 ADP transport; GO:0015867 ATP transport; GO:0015868 purine ribonucleotide transport; GO:0015893 drug transport; GO:001…	GO:0005622 intracellular; GO:0005623 cell; GO:0005737 cytoplasm; GO:0009507 chloroplast; GO:0009526 plastid envelope; GO:0009536 plastid; GO:0009941 chloroplast envelope; GO:0016020 membrane; GO:0031090 organelle membrane; GO:0031967 organelle envelope; GO:0031969 chloroplast membrane; GO:0031975 envelope; GO:0042170 plastid membrane; GO:0043226 organelle; GO:0043227 membrane-bounded organelle; G…	GO:0000295 adenine nucleotide transmembrane transporter activity; GO:0005215 transporter activity; GO:0005346 purine ribonucleotide transmembrane transporter activity; GO:0005347 ATP transmembrane transporter activity; GO:0005471 ATP:ADP antiporter activity; GO:0008509 anion transmembrane transporter activity; GO:0008514 organic anion transmembrane transporter activity; GO:0015075 ion transmembra…
A0A2G3A293	Ribulose-phosphate 3-epimerase, chloroplastic OS=Capsicum annuum OX=4072 GN=T459_10416 PE=4 SV=1	T459_10416	34.3	0.914	0.923	0.979	1.01	1.054	1.055	1.029	0.975	1.013	0.994	1.026	0.976	1.164	1.056	1.132	0.871	0.892	0.899	0.903	0.0165775	1.007	0.764636	1.259	0.00165872	chloroplast	K01783	rpe, RPE; ribulose-phosphate 3-epimerase [EC:5.1.3.1]	map00030 Pentose phosphate pathway; map00040 Pentose and glucuronate interconversions; map00710 Carbon fixation in photosynthetic organisms; map01100 Metabolic pathways; map01110 Biosynthesis of secondary metabolites; map01200 Carbon metabolism; map01230 Biosynthesis of amino acids	GO:0005975 carbohydrate metabolic process; GO:0005996 monosaccharide metabolic process; GO:0006081 cellular aldehyde metabolic process; GO:0006098 pentose-phosphate shunt; GO:0006139 nucleobase-containing compound metabolic process; GO:0006725 cellular aromatic compound metabolic process; GO:0006732 coenzyme metabolic process; GO:0006733 oxidoreduction coenzyme metabolic process; GO:0006739 NADP …	GO:0005622 intracellular; GO:0005623 cell; GO:0005737 cytoplasm; GO:0005829 cytosol; GO:0009507 chloroplast; GO:0009534 chloroplast thylakoid; GO:0009535 chloroplast thylakoid membrane; GO:0009536 plastid; GO:0009579 thylakoid; GO:0016020 membrane; GO:0031976 plastid thylakoid; GO:0031984 organelle subcompartment; GO:0034357 photosynthetic membrane; GO:0042651 thylakoid membrane; GO:0043226 organ…	GO:0003824 catalytic activity; GO:0004750 ribulose-phosphate 3-epimerase activity; GO:0005488 binding; GO:0016853 isomerase activity; GO:0016854 racemase and epimerase activity; GO:0016857 racemase and epimerase activity, acting on carbohydrates and derivatives; GO:0043167 ion binding; GO:0043169 cation binding; GO:0046872 metal ion binding;	PF00834	Ribulose-phosphate 3 epimerase family	G	KOG3111	D-ribulose-5-phosphate 3-epimerase
A0A2G2YR88	Putative proteasome inhibitor OS=Capsicum annuum OX=4072 GN=T459_23051 PE=4 SV=1	T459_23051	22.6	0.99	1.004	0.978	1.006	1.01	1.039	1.127	1.083	1.083	0.891	0.902	0.854	1.193	1.141	1.04	0.884	0.847	0.861	0.973	0.0959214	1.244	0.000502825	1.302	0.00344428	chloroplast	K06700	PSMF1; proteasome inhibitor subunit 1 (PI31)	map03050 Proteasome	GO:0006508 proteolysis; GO:0006511 ubiquitin-dependent protein catabolic process; GO:0006807 nitrogen compound metabolic process; GO:0008152 metabolic process; GO:0009056 catabolic process; GO:0009057 macromolecule catabolic process; GO:0009719 response to endogenous stimulus; GO:0009725 response to hormone; GO:0009733 response to auxin; GO:0009892 negative regulation of metabolic process; GO:000…	GO:0005622 intracellular; GO:0005623 cell; GO:0005634 nucleus; GO:0005737 cytoplasm; GO:0005783 endoplasmic reticulum; GO:0005886 plasma membrane; GO:0012505 endomembrane system; GO:0016020 membrane; GO:0043226 organelle; GO:0043227 membrane-bounded organelle; GO:0043229 intracellular organelle; GO:0043231 intracellular membrane-bounded organelle; GO:0071944 cell periphery;				O	KOG4761	Proteasome formation inhibitor PI31
A0A1U8FKL4	Kinesin-like protein OS=Capsicum annuum OX=4072 GN=T459_20748 PE=3 SV=1	T459_20748	89.4	1.089	1.141	1.043	0.931	0.881	0.897													1.208	0.00351096					nucleus	K10405	KIFC1; kinesin family member C1		GO:0006928 movement of cell or subcellular component; GO:0007017 microtubule-based process; GO:0007018 microtubule-based movement; GO:0009987 cellular process;	GO:0005622 intracellular; GO:0005623 cell; GO:0005856 cytoskeleton; GO:0005871 kinesin complex; GO:0005875 microtubule associated complex; GO:0015630 microtubule cytoskeleton; GO:0032991 protein-containing complex; GO:0043226 organelle; GO:0043228 non-membrane-bounded organelle; GO:0043229 intracellular organelle; GO:0043232 intracellular non-membrane-bounded organelle;	GO:0003774 motor activity; GO:0003777 microtubule motor activity; GO:0003824 catalytic activity; GO:0005488 binding; GO:0005515 protein binding; GO:0008017 microtubule binding; GO:0008092 cytoskeletal protein binding; GO:0015631 tubulin binding; GO:0016462 pyrophosphatase activity; GO:0016787 hydrolase activity; GO:0016817 hydrolase activity, acting on acid anhydrides; GO:0016818 hydrolase activi…	PF00225	Kinesin motor domain	Z	KOG0239	Kinesin (KAR3 subfamily)
A0A1U8HDG2	Triphosphate tunel metalloenzyme 3 OS=Capsicum annuum OX=4072 GN=T459_17524 PE=4 SV=1	T459_17524	26.5	0.974	1.022	1.017	1.022	0.947	1.022	1.042	1.025	1.047	0.96	0.978	0.96	1.041	1.106	0.958	0.933	0.952	0.99	1.007	0.807036	1.075	0.00129172	1.08	0.169502	chloroplast,mitochondria							PF01928	CYTH domain
A0A2G2Z8V1	60S ribosomal protein L36 OS=Capsicum annuum OX=4072 GN=T459_16472 PE=3 SV=1	T459_16472	39.2	0.982	0.94	0.946	1.021	1.11	1.018	0.978	1.031	0.982	1.045	1.043	1.036	1.026	1.02	0.997	0.935	0.979	1.001	0.911	0.0419555	0.957	0.0631268	1.044	0.119261	chloroplast	K02920	RP-L36e, RPL36; large subunit ribosomal protein L36e	map03010 Ribosome	GO:0002181 cytoplasmic translation; GO:0006412 translation; GO:0006518 peptide metabolic process; GO:0006807 nitrogen compound metabolic process; GO:0008152 metabolic process; GO:0009058 biosynthetic process; GO:0009059 macromolecule biosynthetic process; GO:0009987 cellular process; GO:0010467 gene expression; GO:0019538 protein metabolic process; GO:0034641 cellular nitrogen compound metabolic …	GO:0005622 intracellular; GO:0005623 cell; GO:0005737 cytoplasm; GO:0005773 vacuole; GO:0005774 vacuolar membrane; GO:0005829 cytosol; GO:0005840 ribosome; GO:0015934 large ribosomal subunit; GO:0016020 membrane; GO:0022625 cytosolic large ribosomal subunit; GO:0022626 cytosolic ribosome; GO:0031090 organelle membrane; GO:0032991 protein-containing complex; GO:0043226 organelle; GO:0043227 membra…	GO:0003676 nucleic acid binding; GO:0003723 RNA binding; GO:0003735 structural constituent of ribosome; GO:0005198 structural molecule activity; GO:0005488 binding; GO:0097159 organic cyclic compound binding; GO:1901363 heterocyclic compound binding;	PF00069	Protein kinase domain	J	KOG3452	60S ribosomal protein L36
A0A2G2YYH2	Rhodanese-like domain-containing protein 4, chloroplastic OS=Capsicum annuum OX=4072 GN=T459_21968 PE=4 SV=1	T459_21968	46.5	0.986	0.968	0.954	1.031	1.049	1.033	1.069	1.068	1.032	0.969	0.939	0.992	1.158	1.152	1.218	0.829	0.864	0.824	0.934	0.00345022	1.093	0.0107124	1.402	0.000129426	chloroplast	K17525	CHID1; chitinase domain-containing protein 1		GO:0006022 aminoglycan metabolic process; GO:0006026 aminoglycan catabolic process; GO:0006030 chitin metabolic process; GO:0006032 chitin catabolic process; GO:0006040 amino sugar metabolic process; GO:0006091 generation of precursor metabolites and energy; GO:0006807 nitrogen compound metabolic process; GO:0006950 response to stress; GO:0006952 defense response; GO:0008152 metabolic process; GO…	GO:0005576 extracellular region; GO:0005622 intracellular; GO:0005623 cell; GO:0005737 cytoplasm; GO:0009507 chloroplast; GO:0009526 plastid envelope; GO:0009534 chloroplast thylakoid; GO:0009535 chloroplast thylakoid membrane; GO:0009536 plastid; GO:0009579 thylakoid; GO:0009941 chloroplast envelope; GO:0016020 membrane; GO:0031967 organelle envelope; GO:0031975 envelope; GO:0031976 plastid thyl…	GO:0003824 catalytic activity; GO:0004553 hydrolase activity, hydrolyzing O-glycosyl compounds; GO:0004568 chitinase activity; GO:0005488 binding; GO:0008061 chitin binding; GO:0008144 drug binding; GO:0016787 hydrolase activity; GO:0016798 hydrolase activity, acting on glycosyl bonds; GO:0097367 carbohydrate derivative binding;
A0A2G2ZJP8	Methyltransferase OS=Capsicum annuum OX=4072 GN=T459_15169 PE=3 SV=1	T459_15169	75.9	0.968	0.965	0.942	0.958	1.119	1.054	0.942	1.053	0.934	1.054	1.06	1.069	1	0.912	0.926	0.958	1.189	1.056	0.918	0.144564	0.92	0.0948349	0.886	0.161085	endoplasmic reticulum				GO:0008152 metabolic process; GO:0032259 methylation;	GO:0005622 intracellular; GO:0005623 cell; GO:0005737 cytoplasm; GO:0005768 endosome; GO:0005794 Golgi apparatus; GO:0005802 trans-Golgi network; GO:0012505 endomembrane system; GO:0031410 cytoplasmic vesicle; GO:0031982 vesicle; GO:0031984 organelle subcompartment; GO:0043226 organelle; GO:0043227 membrane-bounded organelle; GO:0043229 intracellular organelle; GO:0043231 intracellular membrane-b…	GO:0003824 catalytic activity; GO:0008168 methyltransferase activity; GO:0008757 S-adenosylmethionine-dependent methyltransferase activity; GO:0016740 transferase activity; GO:0016741 transferase activity, transferring one-carbon groups;
A0A1U8GA98	Calcium-dependent protein kinase 5 OS=Capsicum annuum OX=4072 GN=T459_25256 PE=4 SV=1	T459_25256	61.8	1.053	1.054	1.026	0.925	0.953	0.964	0.914	0.894	0.934	1.046	1.046	1.17	0.903	0.822	0.859	1.124	1.181	1.18	1.102	0.00298638	0.841	0.0119393	0.741	0.000698272	nucleus	K13412	CPK; calcium-dependent protein kinase [EC:2.7.11.1]	map04626 Plant-pathogen interaction	GO:0001101 response to acid chemical; GO:0006464 cellular protein modification process; GO:0006468 protein phosphorylation; GO:0006793 phosphorus metabolic process; GO:0006796 phosphate-containing compound metabolic process; GO:0006807 nitrogen compound metabolic process; GO:0006950 response to stress; GO:0007154 cell communication; GO:0007165 signal transduction; GO:0008152 metabolic process; GO…	GO:0005622 intracellular; GO:0005623 cell; GO:0005634 nucleus; GO:0005737 cytoplasm; GO:0005829 cytosol; GO:0005886 plasma membrane; GO:0016020 membrane; GO:0043226 organelle; GO:0043227 membrane-bounded organelle; GO:0043229 intracellular organelle; GO:0043231 intracellular membrane-bounded organelle; GO:0071944 cell periphery;	GO:0003824 catalytic activity; GO:0004672 protein kinase activity; GO:0004674 protein serine/threonine kinase activity; GO:0004683 calmodulin-dependent protein kinase activity; GO:0005488 binding; GO:0005515 protein binding; GO:0005516 calmodulin binding; GO:0009931 calcium-dependent protein serine/threonine kinase activity; GO:0010857 calcium-dependent protein kinase activity; GO:0016301 kinase …	PF00069; PF13499	Protein kinase domain; EF-hand domain pair	T	KOG0032	Ca2+/calmodulin-dependent protein kinase, EF-Hand protein superfamily
A0A2G3A3Q0	Glutamyl-tRNA reductase-binding protein, chloroplastic(predicted) OS=Capsicum annuum OX=4072 GN=T459_10963 PE=4 SV=1	T459_10963	45.8	1.114	1.028	1.033	0.907	0.924	0.99	0.942	1.007	0.975	1.004	0.987	0.98	1.089	1.07	1.068	0.942	0.929	0.914	1.125	0.0336581	0.984	0.473129	1.159	0.000161199	vacuolar membrane				GO:0000271 polysaccharide biosynthetic process; GO:0005975 carbohydrate metabolic process; GO:0005976 polysaccharide metabolic process; GO:0008152 metabolic process; GO:0009058 biosynthetic process; GO:0009059 macromolecule biosynthetic process; GO:0009664 plant-type cell wall organization; GO:0009832 plant-type cell wall biogenesis; GO:0009987 cellular process; GO:0010383 cell wall polysaccharid…	GO:0005618 cell wall; GO:0005622 intracellular; GO:0005623 cell; GO:0005737 cytoplasm; GO:0005768 endosome; GO:0005794 Golgi apparatus; GO:0005802 trans-Golgi network; GO:0009505 plant-type cell wall; GO:0012505 endomembrane system; GO:0030312 external encapsulating structure; GO:0031410 cytoplasmic vesicle; GO:0031982 vesicle; GO:0031984 organelle subcompartment; GO:0043226 organelle; GO:0043227…	GO:0000030 mannosyltransferase activity; GO:0003824 catalytic activity; GO:0016740 transferase activity; GO:0016757 transferase activity, transferring glycosyl groups; GO:0016758 transferase activity, transferring hexosyl groups; GO:0019187 beta-1,4-mannosyltransferase activity; GO:0051753 mannan synthase activity;
A0A2G2YA74	Chaperone protein dnaJ 10 OS=Capsicum annuum OX=4072 GN=T459_31073 PE=4 SV=1	T459_31073	44	0.946	0.86	0.936	1.048	1.075	1.003	0.782	0.889	0.944	1.128	1.133	1.126	0.982	1.016	0.925	1.062	1.034	0.974	0.877	0.0223178	0.772	0.00923291	0.952	0.259998	nucleus							PF00226; PF14308	DnaJ domain; X-domain of DnaJ-containing	O	KOG0691	Molecular chaperone (DnaJ superfamily)
A0A1U8E669	magnesium-dependent phosphatase 1(predicted) OS=Capsicum annuum OX=4072 GN=T459_30067 PE=4 SV=1	T459_30067	21.6	0.914	0.928	0.966	0.994	1.045	1.159							0.998	1.002	1	1.036	1.04	0.933	0.878	0.0561287			0.997	0.963192	nucleus	K17619	MDP1; magnesium-dependent phosphatase 1 [EC:3.1.3.48 3.1.3.-]		GO:0006040 amino sugar metabolic process; GO:0006793 phosphorus metabolic process; GO:0006796 phosphate-containing compound metabolic process; GO:0008152 metabolic process; GO:0009987 cellular process; GO:0016311 dephosphorylation; GO:0030389 fructosamine metabolic process; GO:0044237 cellular metabolic process; GO:0071704 organic substance metabolic process; GO:1901135 carbohydrate derivative me…		GO:0003824 catalytic activity; GO:0016787 hydrolase activity; GO:0016788 hydrolase activity, acting on ester bonds; GO:0016791 phosphatase activity; GO:0042578 phosphoric ester hydrolase activity;			S	KOG4549	Magnesium-dependent phosphatase
A0A1U8EIC9	Putative nucleophosmin-like(predicted) OS=Capsicum annuum OX=4072 GN=T459_25702 PE=4 SV=1	T459_25702	34.4	0.967	0.952	0.953	1.053	1.051	1.057	0.984	0.976	0.973	1.029	1.016	1.045	0.94	0.971	0.966	1.026	1.064	1.053	0.909	5.54842e-05	0.949	0.0040816	0.915	0.00392022	extracellular
A0A2G3AIH7	Protein kinase 2B, chloroplastic OS=Capsicum annuum OX=4072 GN=T459_01929 PE=3 SV=1	T459_01929	45.8	0.939	0.98	0.896	1.096	1.047	1.049							0.951	1.249	1.033	0.839	0.976	0.962	0.882	0.0134645			1.164	0.19112	chloroplast							PF07714	Protein tyrosine kinase	T	KOG1187	Serine/threonine protein kinase
A0A1U8GMV9	NADH dehydrogenase [ubiquinone] 1 alpha subcomplex assembly factor 3-like isoform X1(predicted) OS=Capsicum annuum OX=4072 GN=T459_14335 PE=4 SV=1	T459_14335	20	0.956	0.926	1.054	1.006	1.014	1.05	1.061	0.972	1.058	0.98	0.993	1.01	1.155	1.06	1.094	0.94	0.855	0.891	0.956	0.325905	1.036	0.310839	1.232	0.00493941	chloroplast	K09008	NDUFAF3; NADH dehydrogenase [ubiquinone] 1 alpha subcomplex assembly factor 3					PF04430	Protein of unknown function (DUF498/DUF598)	S	KOG3363	Uncharacterized conserved nuclear protein
A0A2G2Z106	Phosphoinositide phosphatase SAC2 OS=Capsicum annuum OX=4072 GN=T459_19198 PE=4 SV=1	T459_19198	63.6	1.024	0.994	1.122	0.974	1.005	0.886	0.964	0.943	1.017	1	1.048	1.033	0.864	0.938	1.012	1.192	0.984	1.016	1.096	0.155911	0.949	0.116745	0.882	0.171446	nucleus	K22913	FIG4; phosphatidylinositol 3,5-bisphosphate 5-phosphatase [EC:3.1.3.-]	map00562 Inositol phosphate metabolism; map01100 Metabolic pathways	GO:0006629 lipid metabolic process; GO:0006644 phospholipid metabolic process; GO:0006650 glycerophospholipid metabolic process; GO:0006793 phosphorus metabolic process; GO:0006796 phosphate-containing compound metabolic process; GO:0006996 organelle organization; GO:0007033 vacuole organization; GO:0007272 ensheathment of neurons; GO:0007275 multicellular organism development; GO:0007399 nervous…	GO:0005622 intracellular; GO:0005623 cell; GO:0005737 cytoplasm; GO:0005768 endosome; GO:0005811 lipid droplet; GO:0005911 cell-cell junction; GO:0009506 plasmodesma; GO:0010008 endosome membrane; GO:0012505 endomembrane system; GO:0016020 membrane; GO:0030054 cell junction; GO:0031090 organelle membrane; GO:0031410 cytoplasmic vesicle; GO:0031982 vesicle; GO:0043226 organelle; GO:0043227 membran…	GO:0003824 catalytic activity; GO:0004438 phosphatidylinositol-3-phosphatase activity; GO:0016787 hydrolase activity; GO:0016788 hydrolase activity, acting on ester bonds; GO:0016791 phosphatase activity; GO:0034593 phosphatidylinositol bisphosphate phosphatase activity; GO:0034596 phosphatidylinositol phosphate 4-phosphatase activity; GO:0042578 phosphoric ester hydrolase activity; GO:0043812 ph…			I	KOG1888	Putative phosphoinositide phosphatase
A0A1U8DU09	Profilin OS=Capsicum annuum OX=4072 GN=T459_21392 PE=3 SV=1	T459_21392	14.2	0.924	0.949	0.954	1.068	1.111	1.03	1.07	1.114	1.051	0.925	0.951	0.884	1.093	1.135	1.036	0.893	0.936	0.89	0.881	0.006227	1.172	0.00438036	1.2	0.00421973	cytoplasm	K05759	PFN; profilin		GO:0008064 regulation of actin polymerization or depolymerization; GO:0008104 protein localization; GO:0009987 cellular process; GO:0010639 negative regulation of organelle organization; GO:0016043 cellular component organization; GO:0030832 regulation of actin filament length; GO:0030833 regulation of actin filament polymerization; GO:0030837 negative regulation of actin filament polymerization;…	GO:0005622 intracellular; GO:0005623 cell; GO:0005737 cytoplasm; GO:0005856 cytoskeleton; GO:0005938 cell cortex; GO:0015629 actin cytoskeleton; GO:0043226 organelle; GO:0043228 non-membrane-bounded organelle; GO:0043229 intracellular organelle; GO:0043232 intracellular non-membrane-bounded organelle; GO:0071944 cell periphery; GO:0099568 cytoplasmic region;	GO:0003779 actin binding; GO:0003785 actin monomer binding; GO:0005488 binding; GO:0005515 protein binding; GO:0008092 cytoskeletal protein binding;	PF00235	Profilin	Z	KOG1755	Profilin
A0A1U8GIG1	Putative sugar phosphate/phosphate translocator OS=Capsicum annuum OX=4072 GN=T459_00435 PE=4 SV=1	T459_00435	38.7	1.024	1.085	1.068	0.935	0.962	0.931	0.96	0.852	1.155	0.988	1.155	0.895	1.063	0.986	1.02	0.939	1.037	0.966	1.123	0.00444726	0.977	0.83299	1.043	0.309232	plasma membrane									EG	KOG1441	Glucose-6-phosphate/phosphate and phosphoenolpyruvate/phosphate antiporter
A0A1U8DX39	DYW_deaminase domain-containing protein OS=Capsicum annuum OX=4072 GN=T459_33029 PE=4 SV=1	T459_33029	71.1	1.07	0.969	1.086	0.919	0.919	1.007	1.016	0.86	0.992	0.972	1.046	1.118	0.735	0.89	0.782	1.228	1.204	1.162	1.098	0.117435	0.915	0.242131	0.67	0.00233026	mitochondria				GO:0000003 reproduction; GO:0003006 developmental process involved in reproduction; GO:0006139 nucleobase-containing compound metabolic process; GO:0006725 cellular aromatic compound metabolic process; GO:0006807 nitrogen compound metabolic process; GO:0007275 multicellular organism development; GO:0008152 metabolic process; GO:0009451 RNA modification; GO:0009790 embryo development; GO:0009791 p…	GO:0005622 intracellular; GO:0005623 cell; GO:0005737 cytoplasm; GO:0005739 mitochondrion; GO:0009507 chloroplast; GO:0009536 plastid; GO:0043226 organelle; GO:0043227 membrane-bounded organelle; GO:0043229 intracellular organelle; GO:0043231 intracellular membrane-bounded organelle;	GO:0003676 nucleic acid binding; GO:0003723 RNA binding; GO:0003824 catalytic activity; GO:0004518 nuclease activity; GO:0004519 endonuclease activity; GO:0005488 binding; GO:0016787 hydrolase activity; GO:0016788 hydrolase activity, acting on ester bonds; GO:0097159 organic cyclic compound binding; GO:1901363 heterocyclic compound binding;			S	KOG4197	FOG: PPR repeat
A0A1U8H1N2	Alba domain-containing protein OS=Capsicum annuum OX=4072 GN=T459_17095 PE=4 SV=1	T459_17095	14.3	1.037	0.987	0.971	1.003	1.025	0.989	1.116	1.048	1.025	0.96	0.942	0.95	1	0.988	1.024	0.971	1.036	0.995	0.993	0.750686	1.118	0.0130249	1.003	0.876767	cytoplasm
A0A2G3AIL7	DNA-directed RNA polymerase subunit beta OS=Capsicum annuum OX=4072 GN=T459_01978 PE=3 SV=1	T459_01978	40.4																									chloroplast	K03043	rpoB; DNA-directed RNA polymerase subunit beta [EC:2.7.7.6]	map03020 RNA polymerase				PF04561; PF04565	RNA polymerase Rpb2, domain 2; RNA polymerase Rpb2, domain 3	K	KOG0214	RNA polymerase II, second largest subunit
A0A1U8EVI0	Phospholipid-transporting ATPase OS=Capsicum annuum OX=4072 GN=T459_27427 PE=3 SV=1	T459_27427	138.4	1.013	1.116	1.2	0.949	0.904	0.923							0.853	0.759	1.004	1.171	1.185	1.03	1.199	0.024548			0.773	0.0472038	plasma membrane	K14802	DRS2, ATP8A; phospholipid-transporting ATPase [EC:7.6.2.1]		GO:0006810 transport; GO:0006811 ion transport; GO:0006820 anion transport; GO:0006869 lipid transport; GO:0006900 vesicle budding from membrane; GO:0006996 organelle organization; GO:0007275 multicellular organism development; GO:0009987 cellular process; GO:0010876 lipid localization; GO:0015711 organic anion transport; GO:0015748 organophosphate ester transport; GO:0015914 phospholipid transpo…	GO:0005622 intracellular; GO:0005623 cell; GO:0005737 cytoplasm; GO:0005768 endosome; GO:0005794 Golgi apparatus; GO:0005802 trans-Golgi network; GO:0005886 plasma membrane; GO:0012505 endomembrane system; GO:0016020 membrane; GO:0031410 cytoplasmic vesicle; GO:0031982 vesicle; GO:0031984 organelle subcompartment; GO:0043226 organelle; GO:0043227 membrane-bounded organelle; GO:0043229 intracellul…	GO:0003824 catalytic activity; GO:0005215 transporter activity; GO:0005319 lipid transporter activity; GO:0005548 phospholipid transporter activity; GO:0016462 pyrophosphatase activity; GO:0016787 hydrolase activity; GO:0016817 hydrolase activity, acting on acid anhydrides; GO:0016818 hydrolase activity, acting on acid anhydrides, in phosphorus-containing anhydrides; GO:0016887 ATPase activity; G…			P	KOG0206	P-type ATPase
A0A1U8FIS3	actin cytoskeleton-regulatory complex protein PAN1-like isoform X1(predicted) OS=Capsicum annuum OX=4072 GN=T459_04498 PE=4 SV=1	T459_04498	133.8	1.06	0.926	0.999	1.03	0.973	1.018							1.13	0.745	1.126	1	0.975	1.03	0.988	0.772894			0.999	0.896728	nucleus	K12472	EPS15; epidermal growth factor receptor substrate 15	map04144 Endocytosis				PF13202	EF hand	TU	KOG0998	Synaptic vesicle protein EHS-1 and related EH domain proteins
A0A2G3AGN0	40S ribosomal protein S6 OS=Capsicum annuum OX=4072 GN=T459_01283 PE=3 SV=1	T459_01283	28.3	1.091	1.051	1.097	0.951	0.954	0.935	0.976	0.955	0.926	1.046	1.035	1.042	0.931	0.91	0.902	1.086	1.117	1.066	1.14	0.000899946	0.915	0.00458371	0.839	0.000447713	nucleus	K02991	RP-S6e, RPS6; small subunit ribosomal protein S6e	map03010 Ribosome						J	KOG1646	40S ribosomal protein S6
A0A2G2YCL6	HD domain-containing protein 2 OS=Capsicum annuum OX=4072 GN=T459_26961 PE=4 SV=1	T459_26961	29	0.992	0.979	0.939	1.046	1.014	1.022	0.913	0.984	0.975	0.966	1.033	1.014	0.934	0.923	0.936	1.016	1.138	1.056	0.944	0.0386719	0.953	0.19485	0.87	0.0146994	chloroplast	K07023	K07023; putative hydrolases of HD superfamily					PF13023	HD domain	S	KOG3197	Predicted hydrolases of HD superfamily
A0A1U8HDP9	Casein kinase I isoform epsilon OS=Capsicum annuum OX=4072 GN=T459_17350 PE=3 SV=1	T459_17350	51.3	1.046	1.002	0.955	0.787	1.014	1.202													1	0.91565					nucleus	K02218	CSNK1, CKI; casein kinase 1 [EC:2.7.11.1]		GO:0006464 cellular protein modification process; GO:0006468 protein phosphorylation; GO:0006793 phosphorus metabolic process; GO:0006796 phosphate-containing compound metabolic process; GO:0006807 nitrogen compound metabolic process; GO:0008152 metabolic process; GO:0008360 regulation of cell shape; GO:0009987 cellular process; GO:0016310 phosphorylation; GO:0018105 peptidyl-serine phosphorylati…	GO:0005622 intracellular; GO:0005623 cell; GO:0005634 nucleus; GO:0005737 cytoplasm; GO:0005886 plasma membrane; GO:0016020 membrane; GO:0043226 organelle; GO:0043227 membrane-bounded organelle; GO:0043229 intracellular organelle; GO:0043231 intracellular membrane-bounded organelle; GO:0071944 cell periphery;	GO:0003824 catalytic activity; GO:0004672 protein kinase activity; GO:0004674 protein serine/threonine kinase activity; GO:0016301 kinase activity; GO:0016740 transferase activity; GO:0016772 transferase activity, transferring phosphorus-containing groups; GO:0016773 phosphotransferase activity, alcohol group as acceptor; GO:0140096 catalytic activity, acting on a protein;	PF00069	Protein kinase domain	T	KOG1164	Casein kinase (serine/threonine/tyrosine protein kinase)
A0A1U8EW35	Thioredoxin domain-containing protein 9 OS=Capsicum annuum OX=4072 GN=T459_29021 PE=4 SV=1	T459_29021	24.2	1.044	1.009	0.92	1.033	1.004	0.997	1.088	1.07	1.114	0.836	0.949	0.952	1.028	0.97	0.954	0.963	1.06	1.033	0.98	0.611699	1.195	0.0153232	0.966	0.400716	cytoplasm				GO:0006139 nucleobase-containing compound metabolic process; GO:0006725 cellular aromatic compound metabolic process; GO:0006807 nitrogen compound metabolic process; GO:0008152 metabolic process; GO:0008616 queuosine biosynthetic process; GO:0009058 biosynthetic process; GO:0009116 nucleoside metabolic process; GO:0009119 ribonucleoside metabolic process; GO:0009163 nucleoside biosynthetic proces…	GO:0005622 intracellular; GO:0005623 cell; GO:0005737 cytoplasm;		PF00085	Thioredoxin	CO	KOG1672	ATP binding protein
A0A2G2ZQX6	probable rhamnogalacturonate lyase B(predicted) OS=Capsicum annuum OX=4072 GN=T459_12833 PE=4 SV=1	T459_12833	59.5	1.082	0.92	0.974	1.044	1.07	0.916	0.996	0.944	0.966	1.03	1.088	0.984	1.08	1.036	0.986	0.98	0.977	0.951	0.982	0.803827	0.937	0.121069	1.067	0.084289	cytoplasm	K18195	RGL4, rhiE; rhamnogalacturonan endolyase [EC:4.2.2.23]
A0A1U8G4V3	2-C-methyl-D-erythritol 2,4-cyclodiphosphate synthase OS=Capsicum annuum OX=4072 GN=T459_00226 PE=3 SV=1	T459_00226	24.5	1.016	0.972	0.986	1.026	1.023	0.978	1.066	1.004	1.023	0.96	1.012	0.946	1.198	1.132	1.15	0.809	0.859	0.833	0.982	0.4342	1.06	0.0973213	1.391	0.000166344	chloroplast	K01770	ispF; 2-C-methyl-D-erythritol 2,4-cyclodiphosphate synthase [EC:4.6.1.12]	map00900 Terpenoid backbone biosynthesis; map01100 Metabolic pathways; map01110 Biosynthesis of secondary metabolites	GO:0006629 lipid metabolic process; GO:0006720 isoprenoid metabolic process; GO:0006721 terpenoid metabolic process; GO:0006725 cellular aromatic compound metabolic process; GO:0006778 porphyrin-containing compound metabolic process; GO:0006779 porphyrin-containing compound biosynthetic process; GO:0006807 nitrogen compound metabolic process; GO:0008152 metabolic process; GO:0008299 isoprenoid bi…	GO:0005622 intracellular; GO:0005623 cell; GO:0005737 cytoplasm; GO:0009507 chloroplast; GO:0009532 plastid stroma; GO:0009536 plastid; GO:0009570 chloroplast stroma; GO:0043226 organelle; GO:0043227 membrane-bounded organelle; GO:0043229 intracellular organelle; GO:0043231 intracellular membrane-bounded organelle;
A0A1U8DW33	Putative tropomyosin-like(predicted) OS=Capsicum annuum OX=4072 GN=T459_32035 PE=4 SV=1	T459_32035	17.5	1.011	0.954	1.08	0.987	1.002	1.004	1.021	1.064	1.082	0.958	0.835	1.048	1.027	1.09	1.15	0.914	0.948	0.88	1.017	0.682242	1.115	0.174298	1.191	0.0111209	nucleus
A0A1U8E4Z5	General transcription factor IIH subunit OS=Capsicum annuum OX=4072 GN=T459_02510 PE=3 SV=1	T459_02510	46.4	1.032	1.114	1.005	0.902	1.016	0.901	0.946	0.861	0.897	1.09	1.088	1.12	0.866	0.756	0.695	1.264	1.206	1.215	1.118	0.0904729	0.82	0.00229711	0.629	0.00205681	nucleus	K03142	TFIIH2, GTF2H2, SSL1; transcription initiation factor TFIIH subunit 2	map03022 Basal transcription factors; map03420 Nucleotide excision repair	GO:0006139 nucleobase-containing compound metabolic process; GO:0006259 DNA metabolic process; GO:0006281 DNA repair; GO:0006289 nucleotide-excision repair; GO:0006351 transcription, DNA-templated; GO:0006355 regulation of transcription, DNA-templated; GO:0006357 regulation of transcription by RNA polymerase II; GO:0006366 transcription by RNA polymerase II; GO:0006725 cellular aromatic compound …	GO:0000428 DNA-directed RNA polymerase complex; GO:0005622 intracellular; GO:0005623 cell; GO:0005634 nucleus; GO:0005654 nucleoplasm; GO:0005667 transcription regulator complex; GO:0005675 transcription factor TFIIH holo complex; GO:0016591 RNA polymerase II, holoenzyme; GO:0030880 RNA polymerase complex; GO:0031974 membrane-enclosed lumen; GO:0031981 nuclear lumen; GO:0032806 carboxy-terminal d…	GO:0003676 nucleic acid binding; GO:0005488 binding; GO:0097159 organic cyclic compound binding; GO:1901363 heterocyclic compound binding;	PF07975	TFIIH C1-like domain	KL	KOG2807	RNA polymerase II transcription initiation/nucleotide excision repair factor TFIIH, subunit SSL1
A0A2G2Z0T2	Putative clathrin assembly protein OS=Capsicum annuum OX=4072 GN=T459_19105 PE=4 SV=1	T459_19105	68.1	1.024	1.075	1.095	0.888	0.887	0.954	0.981	0.93	1.182	1.043	1.039	0.831	0.875	1.018	0.93	1.046	1.078	0.992	1.17	0.00732316	1.062	0.596231	0.906	0.117116	chloroplast					GO:0005622 intracellular; GO:0005623 cell; GO:0005634 nucleus; GO:0005886 plasma membrane; GO:0016020 membrane; GO:0043226 organelle; GO:0043227 membrane-bounded organelle; GO:0043229 intracellular organelle; GO:0043231 intracellular membrane-bounded organelle; GO:0071944 cell periphery;		PF07651	ANTH domain	TU	KOG0251	Clathrin assembly protein AP180 and related proteins, contain ENTH domain
A0A2G2YIJ5	NADH dehydrogenase [ubiquinone] iron-sulfur protein 7, mitochondrial OS=Capsicum annuum OX=4072 GN=T459_28898 PE=3 SV=1	T459_28898	24.2	1.04	0.974	0.991	0.99	1.004	1.007	0.982	0.973	1.024	1.005	0.993	1.019	1.14	1.146	1.161	0.868	0.858	0.878	1.001	0.964086	0.987	0.500738	1.324	5.23155e-06	cytoplasm	K03940	NDUFS7; NADH dehydrogenase (ubiquinone) Fe-S protein 7 [EC:7.1.1.2 1.6.99.3]	map00190 Oxidative phosphorylation; map01100 Metabolic pathways						C	KOG1687	NADH-ubiquinone oxidoreductase, NUFS7/PSST/20 kDa subunit
A0A1U8H9N0	Cysteine proteinase 2 OS=Capsicum annuum OX=4072 GN=T459_19651 PE=3 SV=1	T459_19651	39.3	0.93	0.984	0.988	1.001	1.032	0.999	0.983	1.039	1.015	1.005	0.953	0.995	1.144	1.181	1.095	0.894	0.898	0.841	0.957	0.117702	1.028	0.28741	1.299	0.00101168	vacuolar membrane	K01366	CTSH; cathepsin H [EC:3.4.22.16]		GO:0002376 immune system process; GO:0006508 proteolysis; GO:0006807 nitrogen compound metabolic process; GO:0006955 immune response; GO:0008152 metabolic process; GO:0009056 catabolic process; GO:0009057 macromolecule catabolic process; GO:0009987 cellular process; GO:0019538 protein metabolic process; GO:0030163 protein catabolic process; GO:0043170 macromolecule metabolic process; GO:0044237 c…	GO:0000323 lytic vacuole; GO:0005576 extracellular region; GO:0005615 extracellular space; GO:0005622 intracellular; GO:0005623 cell; GO:0005737 cytoplasm; GO:0005764 lysosome; GO:0005773 vacuole; GO:0043226 organelle; GO:0043227 membrane-bounded organelle; GO:0043229 intracellular organelle; GO:0043231 intracellular membrane-bounded organelle;	GO:0003824 catalytic activity; GO:0004175 endopeptidase activity; GO:0004197 cysteine-type endopeptidase activity; GO:0008233 peptidase activity; GO:0008234 cysteine-type peptidase activity; GO:0016787 hydrolase activity; GO:0070011 peptidase activity, acting on L-amino acid peptides; GO:0140096 catalytic activity, acting on a protein;	PF08246; PF00112	Cathepsin propeptide inhibitor domain (I29); Papain family cysteine protease	O	KOG1543	Cysteine proteinase Cathepsin L
A0A1U8FTG0	Putative SAP30-binding protein-like(predicted) OS=Capsicum annuum OX=4072 GN=T459_05352 PE=4 SV=1	T459_05352	50.3	0.93	0.847	0.982	0.99	1.17	1.086													0.85	0.0666909					nucleus									K	KOG2959	Transcriptional regulator
A0A2G3AA25	CCA-adding enzyme-like isoform X3(predicted) OS=Capsicum annuum OX=4072 GN=T459_06188 PE=3 SV=1	T459_06188	81.8	0.911	1.004	1.151	0.975	1.046	0.916							0.903	0.839	1.035	1.071	1.058	1.098	1.044	0.636092			0.861	0.0694435	chloroplast				GO:0006139 nucleobase-containing compound metabolic process; GO:0006276 plasmid maintenance; GO:0006378 mRNA polyadenylation; GO:0006396 RNA processing; GO:0006397 mRNA processing; GO:0006725 cellular aromatic compound metabolic process; GO:0006807 nitrogen compound metabolic process; GO:0008152 metabolic process; GO:0009451 RNA modification; GO:0009987 cellular process; GO:0010467 gene expressio…	GO:0005622 intracellular; GO:0005623 cell; GO:0005737 cytoplasm; GO:0005829 cytosol;	GO:0003676 nucleic acid binding; GO:0003723 RNA binding; GO:0003824 catalytic activity; GO:0004652 polynucleotide adenylyltransferase activity; GO:0005488 binding; GO:0016740 transferase activity; GO:0016772 transferase activity, transferring phosphorus-containing groups; GO:0016779 nucleotidyltransferase activity; GO:0070566 adenylyltransferase activity; GO:0097159 organic cyclic compound bindin…	PF01743; PF12627	Poly A polymerase head domain; Probable RNA and SrmB- binding site of polymerase A	J	KOG2159	tRNA nucleotidyltransferase/poly(A) polymerase
A0A2G2Z2M4	Sacchrp_dh_C domain-containing protein OS=Capsicum annuum OX=4072 GN=T459_19673 PE=4 SV=1	T459_19673	73.1	1.06	0.964	1.022	1.031	0.969	0.96	1.014	1.01	0.989	0.99	0.966	1.038	1.102	0.979	1.145	0.915	0.925	0.943	1.029	0.469668	1.006	0.780057	1.159	0.0385605	chloroplast	K14157	AASS; alpha-aminoadipic semialdehyde synthase [EC:1.5.1.8 1.5.1.9]	map00310 Lysine degradation; map01100 Metabolic pathways; map01110 Biosynthesis of secondary metabolites	GO:0006082 organic acid metabolic process; GO:0006091 generation of precursor metabolites and energy; GO:0006520 cellular amino acid metabolic process; GO:0006553 lysine metabolic process; GO:0006807 nitrogen compound metabolic process; GO:0008152 metabolic process; GO:0008652 cellular amino acid biosynthetic process; GO:0009058 biosynthetic process; GO:0009066 aspartate family amino acid metabol…	GO:0005622 intracellular; GO:0005623 cell; GO:0005737 cytoplasm;	GO:0003824 catalytic activity; GO:0004753 saccharopine dehydrogenase activity; GO:0016491 oxidoreductase activity; GO:0016645 oxidoreductase activity, acting on the CH-NH group of donors; GO:0016646 oxidoreductase activity, acting on the CH-NH group of donors, NAD or NADP as acceptor;			E	KOG0172	Lysine-ketoglutarate reductase/saccharopine dehydrogenase
A0A1U8GE52	PPM-type phosphatase domain-containing protein OS=Capsicum annuum OX=4072 GN=T459_12332 PE=3 SV=1	T459_12332	36.5	1.001	0.974	1.026	1.005	0.992	0.982	1.05	1.053	1.008	0.946	0.96	0.982	1.011	0.99	0.989	0.976	0.992	1.032	1.007	0.68509	1.077	0.0139969	0.997	0.871373	nucleus	K17506	PPM1L, PP2CE; protein phosphatase 1L [EC:3.1.3.16]							T	KOG0698	Serine/threonine protein phosphatase
A0A1U8HAZ0	Protein EXECUTER 2, chloroplastic OS=Capsicum annuum OX=4072 GN=T459_17765 PE=4 SV=1	T459_17765	72	1.066	0.961	1.021	1.01	0.953	0.995	1.043	1.057	1.092	0.897	1.006	0.914	0.936	0.968	1.042	1.034	0.974	1.052	1.03	0.445594	1.133	0.0295491	0.963	0.384004	chloroplast				GO:0000302 response to reactive oxygen species; GO:0000304 response to singlet oxygen; GO:0006950 response to stress; GO:0006979 response to oxidative stress; GO:0007584 response to nutrient; GO:0009605 response to external stimulus; GO:0009991 response to extracellular stimulus; GO:0010035 response to inorganic substance; GO:0031667 response to nutrient levels; GO:0042221 response to chemical; G…	GO:0005622 intracellular; GO:0005623 cell; GO:0009579 thylakoid; GO:0016020 membrane; GO:0034357 photosynthetic membrane; GO:0042651 thylakoid membrane;
A0A2G3A664	BSD domain-containing protein OS=Capsicum annuum OX=4072 GN=T459_04821 PE=4 SV=1	T459_04821	43.6	1.204	1.179	1.205	0.798	0.832	0.786	1.151	1.16	1.067	0.886	0.881	0.867	0.938	0.966	0.903	1.116	1.034	1.049	1.485	2.78986e-05	1.282	0.00082791	0.877	0.0128179	chloroplast	K04079	HSP90A, htpG; molecular chaperone HtpG	map04141 Protein processing in endoplasmic reticulum; map04626 Plant-pathogen interaction						O	KOG0019	Molecular chaperone (HSP90 family)
A0A2G3AC71	Plant cysteine oxidase 2 OS=Capsicum annuum OX=4072 GN=T459_06962 PE=4 SV=1	T459_06962	30.2																									cytoplasm	K10712	ADO; cysteamine dioxygenase [EC:1.13.11.19]	map00430 Taurine and hypotaurine metabolism; map01100 Metabolic pathways						S	KOG4281	Uncharacterized conserved protein
A0A2G2Z555	Proton pump-interactor 1 OS=Capsicum annuum OX=4072 GN=T459_20631 PE=4 SV=1	T459_20631	63.9	0.999	1.014	0.991	1.034	1.009	0.998	0.982	0.966	0.99	1.007	1.025	1.032	1.042	1.021	1.046	0.959	0.972	0.962	0.988	0.383272	0.959	0.0150049	1.075	0.00108513	cytoplasm				GO:0010155 regulation of proton transport; GO:0032879 regulation of localization; GO:0034762 regulation of transmembrane transport; GO:0034765 regulation of ion transmembrane transport; GO:0043269 regulation of ion transport; GO:0050789 regulation of biological process; GO:0051049 regulation of transport; GO:0065007 biological regulation; GO:1904062 regulation of cation transmembrane transport;	GO:0005622 intracellular; GO:0005623 cell; GO:0005737 cytoplasm; GO:0005783 endoplasmic reticulum; GO:0005789 endoplasmic reticulum membrane; GO:0005886 plasma membrane; GO:0005911 cell-cell junction; GO:0009506 plasmodesma; GO:0012505 endomembrane system; GO:0016020 membrane; GO:0030054 cell junction; GO:0031984 organelle subcompartment; GO:0042175 nuclear outer membrane-endoplasmic reticulum me…	GO:0003676 nucleic acid binding; GO:0003723 RNA binding; GO:0003729 mRNA binding; GO:0005488 binding; GO:0097159 organic cyclic compound binding; GO:1901363 heterocyclic compound binding;
A0A2G3A4H8	Fructose-bisphosphate aldolase OS=Capsicum annuum OX=4072 GN=T459_04259 PE=3 SV=1	T459_04259	42	1.001	0.991	0.984	0.993	1.021	1.073	1.002	0.998	0.988	0.984	1.038	1.044	0.991	1.087	1.029	0.933	0.953	0.993	0.964	0.194409	0.975	0.258007	1.079	0.0798901	chloroplast	K01623	ALDO; fructose-bisphosphate aldolase, class I [EC:4.1.2.13]	map00010 Glycolysis / Gluconeogenesis; map00030 Pentose phosphate pathway; map00051 Fructose and mannose metabolism; map00710 Carbon fixation in photosynthetic organisms; map01100 Metabolic pathways; map01110 Biosynthesis of secondary metabolites; map01200 Carbon metabolism; map01230 Biosynthesis of amino acids				PF00274	Fructose-bisphosphate aldolase class-I	G	KOG1557	Fructose-biphosphate aldolase
A0A2G2Y9Y0	Outer envelope pore protein 24, chloroplastic OS=Capsicum annuum OX=4072 GN=T459_30959 PE=4 SV=1	T459_30959	20.3	0.98	0.962	0.935	1.031	1.047	1.032	0.985	0.981	0.984	0.998	1.052	1.021	1.077	1.075	1.056	0.957	0.973	0.898	0.925	0.00583148	0.961	0.0593577	1.134	0.00740101	nucleus				GO:0006810 transport; GO:0006811 ion transport; GO:0006812 cation transport; GO:0032879 regulation of localization; GO:0034220 ion transmembrane transport; GO:0034762 regulation of transmembrane transport; GO:0034765 regulation of ion transmembrane transport; GO:0043269 regulation of ion transport; GO:0050789 regulation of biological process; GO:0051049 regulation of transport; GO:0051179 localiz…	GO:0005622 intracellular; GO:0005623 cell; GO:0005737 cytoplasm; GO:0005739 mitochondrion; GO:0009507 chloroplast; GO:0009513 etioplast; GO:0009526 plastid envelope; GO:0009527 plastid outer membrane; GO:0009536 plastid; GO:0009707 chloroplast outer membrane; GO:0009941 chloroplast envelope; GO:0016020 membrane; GO:0016021 integral component of membrane; GO:0019867 outer membrane; GO:0031090 orga…	GO:0005215 transporter activity; GO:0005216 ion channel activity; GO:0005244 voltage-gated ion channel activity; GO:0005261 cation channel activity; GO:0008324 cation transmembrane transporter activity; GO:0015075 ion transmembrane transporter activity; GO:0015267 channel activity; GO:0015288 porin activity; GO:0015318 inorganic molecular entity transmembrane transporter activity; GO:0022803 pass…
A0A1U8E831	Cell division cycle protein 48-like protein OS=Capsicum annuum OX=4072 GN=T459_26060 PE=3 SV=1	T459_26060	89.9	1.033	0.972	1.056	0.968	0.974	1.002	0.99	0.871	0.883	1.06	1.112	1.087	0.806	0.869	0.861	1.008	1.083	1.147	1.04	0.226862	0.842	0.0155434	0.783	0.00531479	cytoplasm	K13525	VCP, CDC48; transitional endoplasmic reticulum ATPase	map04141 Protein processing in endoplasmic reticulum	GO:0009893 positive regulation of metabolic process; GO:0009894 regulation of catabolic process; GO:0009896 positive regulation of catabolic process; GO:0010035 response to inorganic substance; GO:0010038 response to metal ion; GO:0010604 positive regulation of macromolecule metabolic process; GO:0019222 regulation of metabolic process; GO:0042176 regulation of protein catabolic process; GO:00422…	GO:0005622 intracellular; GO:0005623 cell; GO:0005634 nucleus; GO:0005654 nucleoplasm; GO:0005730 nucleolus; GO:0005737 cytoplasm; GO:0005794 Golgi apparatus; GO:0005829 cytosol; GO:0005886 plasma membrane; GO:0012505 endomembrane system; GO:0016020 membrane; GO:0031974 membrane-enclosed lumen; GO:0031981 nuclear lumen; GO:0043226 organelle; GO:0043227 membrane-bounded organelle; GO:0043228 non-m…		PF02359; PF02933; PF00004; PF09336	Cell division protein 48 (CDC48), N-terminal domain; Cell division protein 48 (CDC48), domain 2; ATPase family associated with various cellular activities (AAA); Vps4 C terminal oligomerisation domain	O	KOG0730	AAA+-type ATPase
A0A2G2YXA1	Putative elongation factor Ts-like(predicted) OS=Capsicum annuum OX=4072 GN=T459_21522 PE=4 SV=1	T459_21522	58.5	1.148	1.049	1.159	0.845	0.854	0.919	0.95	0.932	0.96	1.036	1.017	1.113	0.859	0.874	0.895	1.114	1.11	1.143	1.282	0.00387013	0.898	0.0204794	0.781	7.97352e-05	chloroplast
A0A1U8F2J9	Putative myosin-H heavy chain-like(predicted) OS=Capsicum annuum OX=4072 GN=T459_32815 PE=4 SV=1	T459_32815	44.4	1.021	0.99	0.954	1.036	0.99	0.996	1.053	1.003	1.003	1.015	0.973	0.945	0.982	0.982	0.929	1.019	0.996	1.022	0.981	0.472208	1.043	0.184005	0.953	0.0729716	cytoplasm				GO:0006950 response to stress; GO:0007088 regulation of mitotic nuclear division; GO:0007346 regulation of mitotic cell cycle; GO:0009266 response to temperature stimulus; GO:0009408 response to heat; GO:0009628 response to abiotic stimulus; GO:0009893 positive regulation of metabolic process; GO:0010286 heat acclimation; GO:0010468 regulation of gene expression; GO:0010564 regulation of cell cyc…	GO:0005622 intracellular; GO:0005623 cell; GO:0005634 nucleus; GO:0005694 chromosome; GO:0005730 nucleolus; GO:0010369 chromocenter; GO:0031974 membrane-enclosed lumen; GO:0031981 nuclear lumen; GO:0043226 organelle; GO:0043227 membrane-bounded organelle; GO:0043228 non-membrane-bounded organelle; GO:0043229 intracellular organelle; GO:0043231 intracellular membrane-bounded organelle; GO:0043232 …
A0A2G2XXL5	Putative ovule protein(predicted) OS=Capsicum annuum OX=4072 GN=T459_33992 PE=4 SV=1	T459_33992	64.4	1.013	0.992	0.974	0.98	1.022	1.002	0.962	1.022	0.963	1.018	1.02	1.039	0.997	0.986	0.98	0.994	1.019	1.058	0.992	0.641817	0.958	0.107229	0.965	0.132385	cytoplasm							PF05641	Agenet domain
A0A1U8EVS9	DUF155 domain-containing protein OS=Capsicum annuum OX=4072 GN=T459_30234 PE=4 SV=1	T459_30234	46.5	1.127	1.136	1.119	0.877	0.893	0.853	1.01	0.99	1.017	1.02	1.058	0.913	0.712	0.84	1.016	1.168	1.174	1.091	1.289	5.43258e-05	1.009	0.826612	0.748	0.0464344	chloroplast									S	KOG2861	Uncharacterized conserved protein
A0A2G2Z556	choline transporter-like protein 2 isoform X1(predicted) OS=Capsicum annuum OX=4072 GN=T459_20645 PE=3 SV=1	T459_20645	77.9	1.017	1.038	1.093	0.93	0.989	1.079	1.089	1.02	0.938	0.983	1.031	0.99	0.988	1.156	1.149	0.935	0.908	0.874	1.05	0.355785	1.014	0.796732	1.212	0.0258495	plasma membrane	K15377	SLC44A2_4_5; solute carrier family 44 (choline transporter-like protein), member 2/4/5		GO:0000003 reproduction; GO:0001558 regulation of cell growth; GO:0003002 regionalization; GO:0003006 developmental process involved in reproduction; GO:0006810 transport; GO:0006811 ion transport; GO:0006812 cation transport; GO:0006836 neurotransmitter transport; GO:0007275 multicellular organism development; GO:0007389 pattern specification process; GO:0008104 protein localization; GO:0009663 …	GO:0000139 Golgi membrane; GO:0000325 plant-type vacuole; GO:0005618 cell wall; GO:0005622 intracellular; GO:0005623 cell; GO:0005737 cytoplasm; GO:0005768 endosome; GO:0005769 early endosome; GO:0005773 vacuole; GO:0005774 vacuolar membrane; GO:0005794 Golgi apparatus; GO:0005802 trans-Golgi network; GO:0005886 plasma membrane; GO:0005911 cell-cell junction; GO:0009505 plant-type cell wall; GO:0…	GO:0005215 transporter activity; GO:0005326 neurotransmitter transmembrane transporter activity; GO:0008324 cation transmembrane transporter activity; GO:0008519 ammonium transmembrane transporter activity; GO:0015075 ion transmembrane transporter activity; GO:0015101 organic cation transmembrane transporter activity; GO:0015220 choline transmembrane transporter activity; GO:0022857 transmembrane…			I	KOG1362	Choline transporter-like protein
A0A2G2ZQ62	Putative ovule protein (Fragment)(predicted) OS=Capsicum annuum OX=4072 GN=T459_12528 PE=4 SV=1	T459_12528	23.6	0.981	1.104	0.957	1.065	1.016	0.884	0.76	1.06	1.168	1.087	1.073	0.855							1.026	0.726224	0.991	0.904565			vacuolar membrane	K07897	RAB7A; Ras-related protein Rab-7A	map04144 Endocytosis; map04145 Phagosome
A0A1U8FWM0	Arogenate dehydratase OS=Capsicum annuum OX=4072 GN=T459_05886 PE=4 SV=1	T459_05886	45.3	1.022	1.11	0.932	0.995	1.013	0.935	0.944	0.976	1.006	1.001	0.95	0.994	1.009	0.99	1.055	1.027	0.965	0.962	1.041	0.531341	0.994	0.803547	1.034	0.305416	chloroplast	K05359	ADT, PDT; arogenate/prephenate dehydratase [EC:4.2.1.91 4.2.1.51]	map00400 Phenylalanine, tyrosine and tryptophan biosynthesis; map01100 Metabolic pathways; map01110 Biosynthesis of secondary metabolites; map01230 Biosynthesis of amino acids	GO:0006082 organic acid metabolic process; GO:0006520 cellular amino acid metabolic process; GO:0006558 L-phenylalanine metabolic process; GO:0006725 cellular aromatic compound metabolic process; GO:0006807 nitrogen compound metabolic process; GO:0008152 metabolic process; GO:0008652 cellular amino acid biosynthetic process; GO:0009058 biosynthetic process; GO:0009072 aromatic amino acid family m…	GO:0005622 intracellular; GO:0005623 cell; GO:0005737 cytoplasm; GO:0009507 chloroplast; GO:0009536 plastid; GO:0043226 organelle; GO:0043227 membrane-bounded organelle; GO:0043229 intracellular organelle; GO:0043231 intracellular membrane-bounded organelle;	GO:0003824 catalytic activity; GO:0004664 prephenate dehydratase activity; GO:0016829 lyase activity; GO:0016835 carbon-oxygen lyase activity; GO:0016836 hydro-lyase activity; GO:0047769 arogenate dehydratase activity;			E	KOG2797	Prephenate dehydratase
A0A2G2YBQ6	SGL domain-containing protein(predicted) OS=Capsicum annuum OX=4072 GN=T459_26673 PE=4 SV=1	T459_26673	33.5	0.974	1.106	0.995	0.914	1.113	0.903	1.02	1.018	0.954	0.976	1.024	1.016	1.021	1.005	1.005	0.937	1.032	0.986	1.049	0.547337	0.992	0.771436	1.026	0.409151	chloroplast
A0A1U8EMK0	Putative MICOS complex subunit mic25a-like(predicted) OS=Capsicum annuum OX=4072 GN=T459_27137 PE=4 SV=1	T459_27137	20.5	0.956	0.943	0.935	1.009	1.052	1.062	1.027	0.995	0.983	0.935	0.999	1.051	0.991	0.98	0.975	1.027	1	1.033	0.907	0.00468722	1.007	0.843333	0.963	0.0268592	chloroplast
A0A2G2YCN4	Malectin_like domain-containing protein OS=Capsicum annuum OX=4072 GN=T459_26995 PE=4 SV=1	T459_26995	68.4													1.184	1.075	0.956	0.981	0.879	0.938					1.149	0.122026	plasma membrane							PF12819	Carbohydrate-binding protein of the ER	S	KOG0619	FOG: Leucine rich repeat
A0A2G2YHB5	Glucan endo-1,3-beta-glucosidase 14 OS=Capsicum annuum OX=4072 GN=T459_28604 PE=3 SV=1	T459_28604	50.1	0.931	1.007	0.948	0.964	1.121	0.952	1.092	0.906	0.967	0.985	0.921	1.136	0.988	1.028	1.002	0.976	0.906	1.109	0.95	0.44504	0.975	0.779009	1.009	0.847228	plasma membrane					GO:0005622 intracellular; GO:0005623 cell; GO:0005634 nucleus; GO:0005737 cytoplasm; GO:0005886 plasma membrane; GO:0016020 membrane; GO:0031224 intrinsic component of membrane; GO:0031225 anchored component of membrane; GO:0031226 intrinsic component of plasma membrane; GO:0043226 organelle; GO:0043227 membrane-bounded organelle; GO:0043229 intracellular organelle; GO:0043231 intracellular membr…	GO:0003824 catalytic activity; GO:0004553 hydrolase activity, hydrolyzing O-glycosyl compounds; GO:0005488 binding; GO:0016787 hydrolase activity; GO:0016798 hydrolase activity, acting on glycosyl bonds; GO:0030246 carbohydrate binding; GO:0030247 polysaccharide binding;	PF00332	Glycosyl hydrolases family 17
A0A2G3AKQ5	zinc finger CCCH domain-containing protein 53 isoform X1(predicted) OS=Capsicum annuum OX=4072 GN=T459_02708 PE=4 SV=1	T459_02708	82.3	0.955	0.985	1.007	1.045	1.002	1.041	0.907	1.04	1	1.001	1.062	1.015	0.929	0.914	1.144	1.107	0.964	0.949	0.954	0.0835535	0.957	0.370223	0.989	0.881212	nucleus						GO:0003676 nucleic acid binding; GO:0003723 RNA binding; GO:0003729 mRNA binding; GO:0005488 binding; GO:0097159 organic cyclic compound binding; GO:1901363 heterocyclic compound binding;	PF00076	RNA recognition motif. (a.k.a. RRM, RBD, or RNP domain)
A0A2G3AAW6	Interactor of constitutive active ROPs like(predicted) OS=Capsicum annuum OX=4072 GN=T459_06464 PE=4 SV=1	T459_06464	33.7	0.937	0.977	0.854	1.001	1.154	1.085	1.063	0.969	1.07	0.975	1.009	0.923							0.854	0.0514584	1.067	0.192101			nucleus
A0A1U8GX13	Cell division protein FtsY-like protein, chloroplastic OS=Capsicum annuum OX=4072 GN=T459_01326 PE=3 SV=1	T459_01326	39.8	0.985	1.014	1.063	0.98	0.998	0.973	0.997	0.945	1.061	1.036	1.033	0.985	0.949	0.945	0.994	1.043	1.034	1.031	1.038	0.194793	0.983	0.659485	0.929	0.0112637	chloroplast	K03110	ftsY; fused signal recognition particle receptor	map03060 Protein export		GO:0005622 intracellular; GO:0005623 cell; GO:0005737 cytoplasm; GO:0009507 chloroplast; GO:0009532 plastid stroma; GO:0009534 chloroplast thylakoid; GO:0009535 chloroplast thylakoid membrane; GO:0009536 plastid; GO:0009570 chloroplast stroma; GO:0009579 thylakoid; GO:0016020 membrane; GO:0031976 plastid thylakoid; GO:0031984 organelle subcompartment; GO:0034357 photosynthetic membrane; GO:004265…		PF02881; PF00448	SRP54-type protein, helical bundle domain; SRP54-type protein, GTPase domain	U	KOG0780	Signal recognition particle, subunit Srp54
A0A2G2Z3W4	J domain-containing protein OS=Capsicum annuum OX=4072 GN=T459_20224 PE=4 SV=1	T459_20224	37.2	0.97	0.946	0.929	1.04	1.121	1.052	1.022	0.986	0.996	0.952	1.054	0.96	1.053	1.038	1.056	0.978	0.962	0.979	0.885	0.0101812	1.013	0.710362	1.078	0.000640544	cytoskeleton	K09510	DNAJB4; DnaJ homolog subfamily B member 4		GO:0000226 microtubule cytoskeleton organization; GO:0001578 microtubule bundle formation; GO:0006996 organelle organization; GO:0007010 cytoskeleton organization; GO:0007017 microtubule-based process; GO:0009987 cellular process; GO:0016043 cellular component organization; GO:0022607 cellular component assembly; GO:0030030 cell projection organization; GO:0030031 cell projection assembly; GO:003…	GO:0005622 intracellular; GO:0005623 cell; GO:0005737 cytoplasm; GO:0005856 cytoskeleton; GO:0005929 cilium; GO:0005930 axoneme; GO:0031514 motile cilium; GO:0032838 plasma membrane bounded cell projection cytoplasm; GO:0036126 sperm flagellum; GO:0042995 cell projection; GO:0043226 organelle; GO:0043228 non-membrane-bounded organelle; GO:0043229 intracellular organelle; GO:0043232 intracellular …		PF00226; PF01556	DnaJ domain; DnaJ C terminal domain	O	KOG0714	Molecular chaperone (DnaJ superfamily)
A0A1U8EWI4	V-type proton ATPase subunit G OS=Capsicum annuum OX=4072 GN=T459_30251 PE=3 SV=1	T459_30251	12.5	0.942	0.96	0.891	1.138	1.094	1.097	1.016	1.002	0.95	1.019	0.996	1.026	1.228	1.134	1.098	0.877	0.848	0.812	0.839	0.00239994	0.976	0.332255	1.364	0.00150414	chloroplast	K02152	ATPeV1G, ATP6G; V-type H+-transporting ATPase subunit G	map00190 Oxidative phosphorylation; map01100 Metabolic pathways; map04145 Phagosome	GO:0006810 transport; GO:0006811 ion transport; GO:0006812 cation transport; GO:0015672 monovalent inorganic cation transport; GO:0015988 energy coupled proton transmembrane transport, against electrochemical gradient; GO:0034220 ion transmembrane transport; GO:0051179 localization; GO:0051234 establishment of localization; GO:0055085 transmembrane transport; GO:0098655 cation transmembrane trans…	GO:0000325 plant-type vacuole; GO:0005622 intracellular; GO:0005623 cell; GO:0005737 cytoplasm; GO:0005773 vacuole; GO:0005774 vacuolar membrane; GO:0005794 Golgi apparatus; GO:0005829 cytosol; GO:0005886 plasma membrane; GO:0012505 endomembrane system; GO:0016020 membrane; GO:0016469 proton-transporting two-sector ATPase complex; GO:0031090 organelle membrane; GO:0032991 protein-containing compl…	GO:0003824 catalytic activity; GO:0005215 transporter activity; GO:0008324 cation transmembrane transporter activity; GO:0015075 ion transmembrane transporter activity; GO:0015077 monovalent inorganic cation transmembrane transporter activity; GO:0015078 proton transmembrane transporter activity; GO:0015318 inorganic molecular entity transmembrane transporter activity; GO:0015399 primary active t…			C	KOG1772	Vacuolar H+-ATPase V1 sector, subunit G
A0A2G3A9F0	DUF4220 domain-containing protein OS=Capsicum annuum OX=4072 GN=T459_05995 PE=4 SV=1	T459_05995	79.3	1.092	1.152	0.998	0.978	1	0.811	0.971	0.93	0.972	1.084	1.082	1.038	0.93	0.895	0.93	1.1	1.067	1.118	1.162	0.12304	0.897	0.00580315	0.839	0.000715853	plasma membrane
A0A2G2YEM4	RNA-binding protein 25 isoform X1(predicted) OS=Capsicum annuum OX=4072 GN=T459_27687 PE=4 SV=1	T459_27687	100.1	0.993	1.025	0.997	0.994	0.996	0.995	1.048	0.99	0.996	0.976	1.012	1.074	1.002	0.937	1.018	1.031	0.989	1.028	1.01	0.377628	0.991	0.805644	0.97	0.344458	chloroplast	K12822	RBM25, S164; RNA-binding protein 25	map03040 Spliceosome	GO:0000381 regulation of alternative mRNA splicing, via spliceosome; GO:0010468 regulation of gene expression; GO:0010941 regulation of cell death; GO:0019219 regulation of nucleobase-containing compound metabolic process; GO:0019222 regulation of metabolic process; GO:0031323 regulation of cellular metabolic process; GO:0042981 regulation of apoptotic process; GO:0043067 regulation of programmed…	GO:0005622 intracellular; GO:0005623 cell; GO:0005634 nucleus; GO:0005654 nucleoplasm; GO:0005681 spliceosomal complex; GO:0005737 cytoplasm; GO:0016604 nuclear body; GO:0016607 nuclear speck; GO:0031974 membrane-enclosed lumen; GO:0031981 nuclear lumen; GO:0032991 protein-containing complex; GO:0043226 organelle; GO:0043227 membrane-bounded organelle; GO:0043229 intracellular organelle; GO:00432…	GO:0003676 nucleic acid binding; GO:0003723 RNA binding; GO:0003729 mRNA binding; GO:0005488 binding; GO:0097159 organic cyclic compound binding; GO:1901363 heterocyclic compound binding;	PF00076	RNA recognition motif. (a.k.a. RRM, RBD, or RNP domain)	A	KOG2253	U1 snRNP complex, subunit SNU71 and related PWI-motif proteins
A0A1U8G8W3	AUGMIN subunit 4(predicted) OS=Capsicum annuum OX=4072 GN=T459_08478 PE=4 SV=1	T459_08478	47.9	0.98	1.01	1.047	0.955	1.035	1.081							1.016	1.165	1.045	0.749	1.061	0.974	0.989	0.816092			1.159	0.238129	chloroplast	K16587	HAUS4; HAUS augmin-like complex subunit 4			GO:0005622 intracellular; GO:0005623 cell; GO:0005819 spindle; GO:0005856 cytoskeleton; GO:0005874 microtubule; GO:0005876 spindle microtubule; GO:0015630 microtubule cytoskeleton; GO:0043226 organelle; GO:0043228 non-membrane-bounded organelle; GO:0043229 intracellular organelle; GO:0043232 intracellular non-membrane-bounded organelle; GO:0099080 supramolecular complex; GO:0099081 supramolecular…	GO:0005488 binding; GO:0005515 protein binding; GO:0008017 microtubule binding; GO:0008092 cytoskeletal protein binding; GO:0015631 tubulin binding; GO:0051011 microtubule minus-end binding;
A0A2G3A820	Cyclic phosphodiesterase OS=Capsicum annuum OX=4072 GN=T459_05436 PE=4 SV=1	T459_05436	21.9	1.04	0.987	1.023	0.992	1.054	0.911	0.963	0.941	0.948	1.109	1.023	1.022	0.839	0.897	1.085	1.006	1.216	0.96	1.031	0.510183	0.904	0.023151	0.887	0.31538	nucleus				GO:0000394 RNA splicing, via endonucleolytic cleavage and ligation; GO:0006139 nucleobase-containing compound metabolic process; GO:0006388 tRNA splicing, via endonucleolytic cleavage and ligation; GO:0006396 RNA processing; GO:0006399 tRNA metabolic process; GO:0006725 cellular aromatic compound metabolic process; GO:0006753 nucleoside phosphate metabolic process; GO:0006793 phosphorus metabolic…	GO:0005622 intracellular; GO:0005623 cell; GO:0005737 cytoplasm;	GO:0003824 catalytic activity; GO:0004112 cyclic-nucleotide phosphodiesterase activity; GO:0004113 2',3'-cyclic-nucleotide 3'-phosphodiesterase activity; GO:0008081 phosphoric diester hydrolase activity; GO:0016787 hydrolase activity; GO:0016788 hydrolase activity, acting on ester bonds; GO:0042578 phosphoric ester hydrolase activity;	PF07823	Cyclic phosphodiesterase-like protein
A0A2G2ZR16	symplekin(predicted) OS=Capsicum annuum OX=4072 GN=T459_12861 PE=4 SV=1	T459_12861	138.4	0.98	0.997	1.021	0.99	0.993	1.035	0.959	0.963	0.937	0.995	1.047	1.037	1.018	0.954	0.944	1.062	1.064	0.966	0.993	0.741539	0.929	0.014194	0.943	0.216592	chloroplast	K06100	SYMPK; symplekin	map03015 mRNA surveillance pathway						A	KOG1895	mRNA cleavage and polyadenylation factor II complex, subunit PTA1
A0A1U8GUA7	Phosphoribulokinase OS=Capsicum annuum OX=4072 GN=T459_00963 PE=3 SV=1	T459_00963	45.4	0.973	0.993	0.944	1.073	1.006	1.043	0.999	1.02	1.01	0.977	0.995	0.995	1.112	1.078	1.11	0.887	0.907	0.888	0.932	0.041767	1.021	0.0728804	1.23	7.51165e-05	chloroplast	K00855	PRK, prkB; phosphoribulokinase [EC:2.7.1.19]	map00710 Carbon fixation in photosynthetic organisms; map01100 Metabolic pathways; map01200 Carbon metabolism	GO:0006139 nucleobase-containing compound metabolic process; GO:0006206 pyrimidine nucleobase metabolic process; GO:0006213 pyrimidine nucleoside metabolic process; GO:0006220 pyrimidine nucleotide metabolic process; GO:0006221 pyrimidine nucleotide biosynthetic process; GO:0006222 UMP biosynthetic process; GO:0006725 cellular aromatic compound metabolic process; GO:0006753 nucleoside phosphate m…	GO:0005576 extracellular region; GO:0005622 intracellular; GO:0005623 cell; GO:0005737 cytoplasm; GO:0005829 cytosol; GO:0009507 chloroplast; GO:0009526 plastid envelope; GO:0009532 plastid stroma; GO:0009534 chloroplast thylakoid; GO:0009535 chloroplast thylakoid membrane; GO:0009536 plastid; GO:0009570 chloroplast stroma; GO:0009579 thylakoid; GO:0009941 chloroplast envelope; GO:0010319 stromul…	GO:0003824 catalytic activity; GO:0004849 uridine kinase activity; GO:0005488 binding; GO:0005515 protein binding; GO:0008974 phosphoribulokinase activity; GO:0016301 kinase activity; GO:0016740 transferase activity; GO:0016772 transferase activity, transferring phosphorus-containing groups; GO:0016773 phosphotransferase activity, alcohol group as acceptor; GO:0019205 nucleobase-containing compou…	PF00485	Phosphoribulokinase / Uridine kinase family	TZ	KOG4203	Armadillo/beta-Catenin/plakoglobin
A0A1U8FZB4	Glutaminyl-peptide cyclotransferase OS=Capsicum annuum OX=4072 GN=T459_09489 PE=4 SV=1	T459_09489	33	0.966	0.96	1.074	0.986	1.093	0.925	1	1.125	1.008	1.033	0.961	0.883	1.014	1.162	1.052	0.905	0.996	0.881	0.999	0.99634	1.089	0.220442	1.16	0.0546058	chloroplast	K22757	QCT, qpcT; glutaminyl-peptide cyclotransferase [EC:2.3.2.5]		GO:0006464 cellular protein modification process; GO:0006807 nitrogen compound metabolic process; GO:0008152 metabolic process; GO:0009987 cellular process; GO:0017186 peptidyl-pyroglutamic acid biosynthetic process, using glutaminyl-peptide cyclotransferase; GO:0018193 peptidyl-amino acid modification; GO:0018199 peptidyl-glutamine modification; GO:0019538 protein metabolic process; GO:0036211 p…	GO:0005623 cell; GO:0005886 plasma membrane; GO:0016020 membrane; GO:0071944 cell periphery;	GO:0003824 catalytic activity; GO:0016603 glutaminyl-peptide cyclotransferase activity; GO:0016740 transferase activity; GO:0016746 transferase activity, transferring acyl groups; GO:0016755 transferase activity, transferring amino-acyl groups; GO:0140096 catalytic activity, acting on a protein;
A0A1U8H2Q9	Scarecrow-like protein 14 OS=Capsicum annuum OX=4072 GN=T459_18269 PE=3 SV=1	T459_18269	85	1.111	1.082	1.011	0.916	0.971	0.953	0.976	0.947	0.954	0.94	1.058	1.13							1.128	0.021826	0.92	0.212873			nucleus
A0A1U8E622	interactor of constitutive active ROPs 2, chloroplastic(predicted) OS=Capsicum annuum OX=4072 GN=T459_22772 PE=4 SV=1	T459_22772	67.7	1.005	0.977	1.063	1.024	0.932	1.003	0.972	1.036	0.983	1.151	0.774	1.091							1.029	0.488187	0.992	0.963708			chloroplast				GO:0000226 microtubule cytoskeleton organization; GO:0006996 organelle organization; GO:0007010 cytoskeleton organization; GO:0007017 microtubule-based process; GO:0009664 plant-type cell wall organization; GO:0009987 cellular process; GO:0016043 cellular component organization; GO:0030865 cortical cytoskeleton organization; GO:0031122 cytoplasmic microtubule organization; GO:0043622 cortical mic…	GO:0005622 intracellular; GO:0005623 cell; GO:0005634 nucleus; GO:0005737 cytoplasm; GO:0005856 cytoskeleton; GO:0005874 microtubule; GO:0009507 chloroplast; GO:0009536 plastid; GO:0015630 microtubule cytoskeleton; GO:0043226 organelle; GO:0043227 membrane-bounded organelle; GO:0043228 non-membrane-bounded organelle; GO:0043229 intracellular organelle; GO:0043231 intracellular membrane-bounded or…
A0A1U8EGB3	Protein kinase domain-containing protein OS=Capsicum annuum OX=4072 GN=T459_23017 PE=4 SV=1	T459_23017	79.5	1.026	0.842	0.985	1.073	1.059	0.98	0.983	0.992	1.268	0.938	0.949	0.877	0.962	1.04	0.933	1.001	0.893	1.178	0.917	0.249158	1.173	0.152637	0.955	0.666932	chloroplast	K08269	ULK2, ATG1; serine/threonine-protein kinase ULK2 [EC:2.7.11.1]	map04136 Autophagy - other	GO:0006464 cellular protein modification process; GO:0006468 protein phosphorylation; GO:0006793 phosphorus metabolic process; GO:0006796 phosphate-containing compound metabolic process; GO:0006807 nitrogen compound metabolic process; GO:0008152 metabolic process; GO:0008219 cell death; GO:0009405 pathogenesis; GO:0009847 spore germination; GO:0009987 cellular process; GO:0012501 programmed cell …		GO:0003824 catalytic activity; GO:0004672 protein kinase activity; GO:0004674 protein serine/threonine kinase activity; GO:0016301 kinase activity; GO:0016740 transferase activity; GO:0016772 transferase activity, transferring phosphorus-containing groups; GO:0016773 phosphotransferase activity, alcohol group as acceptor; GO:0140096 catalytic activity, acting on a protein;	PF00069	Protein kinase domain	T	KOG0595	Serine/threonine-protein kinase involved in autophagy
A0A2G2Z4P6	Cytochrome OS=Capsicum annuum OX=4072 GN=T459_20504 PE=3 SV=1	T459_20504	64.1	1.078	1.032	1.07	0.865	1.019	0.941	0.891	0.962	0.918	1.073	1.062	1.039							1.126	0.0705615	0.873	0.00493892			chloroplast							PF00067	Cytochrome P450	Q	KOG0157	Cytochrome P450 CYP4/CYP19/CYP26 subfamilies
A0A2G3AF20	sulfofructose kinase-like isoform X1(predicted) OS=Capsicum annuum OX=4072 GN=T459_00660 PE=3 SV=1	T459_00660	29.9	0.987	1.048	1.052	0.958	0.947	1.013	0.986	1.015	1.001	0.993	1.031	0.978	1.045	1.055	1.124	0.964	0.923	0.901	1.058	0.127117	1	0.992544	1.156	0.00864007	cytoplasm									G	KOG2947	Carbohydrate kinase
A0A2G2ZC51	Phospholipase D OS=Capsicum annuum OX=4072 GN=T459_17507 PE=3 SV=1	T459_17507	92.4	1.062	1.129	1.1	0.915	0.906	0.911	0.866	0.891	0.91	1.112	1.101	1.092	0.879	0.915	0.912	1.104	1.089	1.109	1.205	0.000491706	0.807	0.000149273	0.82	0.000141002	cytoplasm	K01115	PLD1_2; phospholipase D1/2 [EC:3.1.4.4]	map00564 Glycerophospholipid metabolism; map00565 Ether lipid metabolism; map01100 Metabolic pathways; map01110 Biosynthesis of secondary metabolites; map04144 Endocytosis	GO:0001101 response to acid chemical; GO:0006082 organic acid metabolic process; GO:0006629 lipid metabolic process; GO:0006631 fatty acid metabolic process; GO:0007154 cell communication; GO:0007165 signal transduction; GO:0007275 multicellular organism development; GO:0008152 metabolic process; GO:0009653 anatomical structure morphogenesis; GO:0009719 response to endogenous stimulus; GO:0009725…	GO:0005622 intracellular; GO:0005623 cell; GO:0005634 nucleus; GO:0005737 cytoplasm; GO:0005739 mitochondrion; GO:0005773 vacuole; GO:0005783 endoplasmic reticulum; GO:0005829 cytosol; GO:0005886 plasma membrane; GO:0005911 cell-cell junction; GO:0009506 plasmodesma; GO:0009507 chloroplast; GO:0009526 plastid envelope; GO:0009536 plastid; GO:0009941 chloroplast envelope; GO:0012505 endomembrane s…	GO:0003824 catalytic activity; GO:0004620 phospholipase activity; GO:0004630 phospholipase D activity; GO:0005096 GTPase activator activity; GO:0005488 binding; GO:0005543 phospholipid binding; GO:0005546 phosphatidylinositol-4,5-bisphosphate binding; GO:0008047 enzyme activator activity; GO:0008081 phosphoric diester hydrolase activity; GO:0008289 lipid binding; GO:0016298 lipase activity; GO:00…	PF00168	C2 domain	I	KOG1329	Phospholipase D1
A0A1U8GDP7	Abscisic stress-ripening protein 3 OS=Capsicum annuum OX=4072 GN=T459_12439 PE=4 SV=1	T459_12439	12.7	0.921	0.857	0.974	1.053	1.115	1.086	1.112	1.018	1.06	0.928	0.953	0.94	1.072	1.106	1.072	0.9	0.916	0.946	0.846	0.0141693	1.131	0.01011	1.177	0.000814785	mitochondria
A0A2G2ZF95	Putative sugar phosphate/phosphate translocator OS=Capsicum annuum OX=4072 GN=T459_13692 PE=4 SV=1	T459_13692	33.7	0.918	0.818	1.011	1.099	1.216	0.943													0.843	0.153194					chloroplast				GO:0000003 reproduction; GO:0003006 developmental process involved in reproduction; GO:0006810 transport; GO:0007275 multicellular organism development; GO:0008152 metabolic process; GO:0009791 post-embryonic development; GO:0009987 cellular process; GO:0010154 fruit development; GO:0010191 mucilage metabolic process; GO:0010214 seed coat development; GO:0015780 nucleotide-sugar transmembrane tra…	GO:0005622 intracellular; GO:0005623 cell; GO:0005737 cytoplasm; GO:0005794 Golgi apparatus; GO:0012505 endomembrane system; GO:0043226 organelle; GO:0043227 membrane-bounded organelle; GO:0043229 intracellular organelle; GO:0043231 intracellular membrane-bounded organelle;				EG	KOG1441	Glucose-6-phosphate/phosphate and phosphoenolpyruvate/phosphate antiporter
A0A1U8F3C9	Glyoxysomal fatty acid beta-oxidation multifunctional protein MFP-a OS=Capsicum annuum OX=4072 GN=T459_31376 PE=3 SV=1	T459_31376	78.9	0.978	0.971	0.952	1.015	1.039	1.065	0.993	0.993	0.958	1.015	1.075	1.011	0.964	0.966	0.994	1.032	1.027	1.018	0.93	0.0107715	0.949	0.0893954	0.95	0.00871323	cytoplasm	K10527	MFP2; enoyl-CoA hydratase/3-hydroxyacyl-CoA dehydrogenase [EC:4.2.1.17 1.1.1.35 1.1.1.211]	map00071 Fatty acid degradation; map00592 alpha-Linolenic acid metabolism; map01100 Metabolic pathways; map01110 Biosynthesis of secondary metabolites; map01212 Fatty acid metabolism	GO:0006082 organic acid metabolic process; GO:0006629 lipid metabolic process; GO:0006631 fatty acid metabolic process; GO:0006635 fatty acid beta-oxidation; GO:0008152 metabolic process; GO:0009056 catabolic process; GO:0009062 fatty acid catabolic process; GO:0009987 cellular process; GO:0016042 lipid catabolic process; GO:0016054 organic acid catabolic process; GO:0019395 fatty acid oxidation;…	GO:0005618 cell wall; GO:0005622 intracellular; GO:0005623 cell; GO:0005634 nucleus; GO:0005730 nucleolus; GO:0005737 cytoplasm; GO:0005777 peroxisome; GO:0005911 cell-cell junction; GO:0009506 plasmodesma; GO:0009514 glyoxysome; GO:0030054 cell junction; GO:0030312 external encapsulating structure; GO:0031974 membrane-enclosed lumen; GO:0031981 nuclear lumen; GO:0042579 microbody; GO:0043226 org…	GO:0003824 catalytic activity; GO:0003857 3-hydroxyacyl-CoA dehydrogenase activity; GO:0004165 dodecenoyl-CoA delta-isomerase activity; GO:0004300 enoyl-CoA hydratase activity; GO:0008692 3-hydroxybutyryl-CoA epimerase activity; GO:0016491 oxidoreductase activity; GO:0016508 long-chain-enoyl-CoA hydratase activity; GO:0016614 oxidoreductase activity, acting on CH-OH group of donors; GO:0016616 ox…	PF00378; PF02737; PF00725	Enoyl-CoA hydratase/isomerase family; 3-hydroxyacyl-CoA dehydrogenase, NAD binding domain; 3-hydroxyacyl-CoA dehydrogenase, C-terminal domain	I	KOG1683	Hydroxyacyl-CoA dehydrogenase/enoyl-CoA hydratase
A0A1U8FVX2	Carbamoyl-phosphate synthase small chain OS=Capsicum annuum OX=4072 GN=T459_10397 PE=3 SV=1	T459_10397	46.8	1.03	1.012	1.03	0.999	0.947	0.979	1.018	1.005	1.047	0.964	0.972	1.001	0.871	0.977	0.891	1.157	1.046	1.096	1.05	0.0416893	1.045	0.0563122	0.83	0.0150327	chloroplast	K01956	carA, CPA1; carbamoyl-phosphate synthase small subunit [EC:6.3.5.5]	map00240 Pyrimidine metabolism; map00250 Alanine, aspartate and glutamate metabolism; map01100 Metabolic pathways	GO:0000050 urea cycle; GO:0006082 organic acid metabolic process; GO:0006520 cellular amino acid metabolic process; GO:0006525 arginine metabolic process; GO:0006526 arginine biosynthetic process; GO:0006807 nitrogen compound metabolic process; GO:0006950 response to stress; GO:0007154 cell communication; GO:0008152 metabolic process; GO:0008652 cellular amino acid biosynthetic process; GO:000905…	GO:0005622 intracellular; GO:0005623 cell; GO:0005737 cytoplasm; GO:0005951 carbamoyl-phosphate synthase complex; GO:0009507 chloroplast; GO:0009532 plastid stroma; GO:0009536 plastid; GO:0009570 chloroplast stroma; GO:0032991 protein-containing complex; GO:0043226 organelle; GO:0043227 membrane-bounded organelle; GO:0043229 intracellular organelle; GO:0043231 intracellular membrane-bounded organ…	GO:0003824 catalytic activity; GO:0004088 carbamoyl-phosphate synthase (glutamine-hydrolyzing) activity; GO:0016874 ligase activity; GO:0016879 ligase activity, forming carbon-nitrogen bonds; GO:0016884 carbon-nitrogen ligase activity, with glutamine as amido-N-donor;	PF00988; PF00117	Carbamoyl-phosphate synthase small chain, CPSase domain; Glutamine amidotransferase class-I	EF	KOG0370	Multifunctional pyrimidine synthesis protein CAD (includes carbamoyl-phophate synthetase, aspartate transcarbamylase, and glutamine amidotransferase)
A0A1U8GLE7	ATP-binding cassette sub-family E member 1 OS=Capsicum annuum OX=4072 GN=T459_01073 PE=4 SV=1	T459_01073	68.1	1.114	1.119	1.127	0.876	0.912	0.9	0.926	0.96	0.964	1.066	1.044	1.014	0.94	0.836	0.881	1.154	1.162	1.109	1.25	5.45632e-05	0.912	0.00898385	0.776	0.00230529	cytoplasm	K06174	ABCE1, Rli1; ATP-binding cassette, sub-family E, member 1		GO:0000054 ribosomal subunit export from nucleus; GO:0006403 RNA localization; GO:0006405 RNA export from nucleus; GO:0006412 translation; GO:0006413 translational initiation; GO:0006415 translational termination; GO:0006518 peptide metabolic process; GO:0006611 protein export from nucleus; GO:0006807 nitrogen compound metabolic process; GO:0006810 transport; GO:0006886 intracellular protein tran…		GO:0000166 nucleotide binding; GO:0005215 transporter activity; GO:0005488 binding; GO:0005506 iron ion binding; GO:0005524 ATP binding; GO:0008144 drug binding; GO:0017076 purine nucleotide binding; GO:0030554 adenyl nucleotide binding; GO:0032553 ribonucleotide binding; GO:0032555 purine ribonucleotide binding; GO:0032559 adenyl ribonucleotide binding; GO:0035639 purine ribonucleoside triphosph…	PF00037; PF00005	4Fe-4S binding domain; ABC transporter	A	KOG0063	RNAse L inhibitor, ABC superfamily
A0A2G2YND0	UBA domain-containing protein (Fragment) OS=Capsicum annuum OX=4072 GN=T459_26344 PE=4 SV=1	T459_26344	43.8	1.038	0.987	0.935	1.068	0.944	1.036	1.008	0.972	0.949	1.03	1.038	1.01	1.017	1.066	0.999	1.007	0.902	1.019	0.971	0.5791	0.952	0.0613672	1.053	0.293928	plasma membrane							PF00627	UBA/TS-N domain	S	KOG2632	Rhomboid family proteins
A0A1U8H1N9	Protein kinase domain-containing protein OS=Capsicum annuum OX=4072 GN=T459_18517 PE=4 SV=1	T459_18517	25.1	0.98	0.966	1.018	1.024	1.034	0.981	0.99	0.986	1.03	0.968	0.995	1.036	1.104	1.117	1.096	0.896	0.909	0.891	0.975	0.329109	1.002	0.921692	1.23	1.40332e-05	cytoplasm	K08851	TP53RK, PRPK, BUD32; TP53 regulating kinase and related kinases [EC:2.7.11.1]					PF00069	Protein kinase domain	T	KOG3087	Serine/threonine protein kinase
A0A1U8G213	Protein CDI OS=Capsicum annuum OX=4072 GN=T459_10895 PE=4 SV=1	T459_10895	31.2	1.003	0.998	0.982	1.016	0.98	1.003	1.064	1.025	1.048	0.939	0.972	0.969	1.072	1.074	1.067	0.903	0.932	0.927	0.995	0.69075	1.089	0.00524045	1.163	0.000109216	cytoplasm				GO:0000003 reproduction; GO:0000902 cell morphogenesis; GO:0000904 cell morphogenesis involved in differentiation; GO:0003006 developmental process involved in reproduction; GO:0009653 anatomical structure morphogenesis; GO:0009826 unidimensional cell growth; GO:0009846 pollen germination; GO:0009856 pollination; GO:0009860 pollen tube growth; GO:0009932 cell tip growth; GO:0009987 cellular proce…	GO:0005622 intracellular; GO:0005623 cell; GO:0005737 cytoplasm; GO:0005829 cytosol;
A0A2G2XWX4	Hexosyltransferase OS=Capsicum annuum OX=4072 GN=T459_34150 PE=3 SV=1	T459_34150	60.1							0.952	1.287	1.264	0.886	0.824	0.798	1.054	1.096	0.943	0.967	0.969	0.981			1.397	0.0334746	1.06	0.279297	plasma membrane	K22809	IPUT1; inositol phosphorylceramide glucuronosyltransferase 1 [EC:2.4.1.-]		GO:0000271 polysaccharide biosynthetic process; GO:0005975 carbohydrate metabolic process; GO:0005976 polysaccharide metabolic process; GO:0005977 glycogen metabolic process; GO:0005978 glycogen biosynthetic process; GO:0006073 cellular glucan metabolic process; GO:0006091 generation of precursor metabolites and energy; GO:0006112 energy reserve metabolic process; GO:0006629 lipid metabolic proce…	GO:0005622 intracellular; GO:0005623 cell; GO:0005737 cytoplasm; GO:0005768 endosome; GO:0005794 Golgi apparatus; GO:0005802 trans-Golgi network; GO:0012505 endomembrane system; GO:0016020 membrane; GO:0031410 cytoplasmic vesicle; GO:0031982 vesicle; GO:0031984 organelle subcompartment; GO:0043226 organelle; GO:0043227 membrane-bounded organelle; GO:0043229 intracellular organelle; GO:0043231 int…	GO:0003824 catalytic activity; GO:0005488 binding; GO:0005536 glucose binding; GO:0008194 UDP-glycosyltransferase activity; GO:0008466 glycogenin glucosyltransferase activity; GO:0015020 glucuronosyltransferase activity; GO:0016740 transferase activity; GO:0016757 transferase activity, transferring glycosyl groups; GO:0016758 transferase activity, transferring hexosyl groups; GO:0030246 carbohydr…			G	KOG1950	Glycosyl transferase, family 8 - glycogenin
A0A2G2Z212	Oxygen-evolving enhancer protein 2, chloroplastic OS=Capsicum annuum OX=4072 GN=T459_19506 PE=4 SV=1	T459_19506	28.4	0.964	0.969	0.986	1.045	1.018	1.032	1.052	1	1.027	0.989	0.982	0.959	1.126	1.175	1.156	0.865	0.828	0.893	0.943	0.00454183	1.051	0.0463301	1.337	0.00032167	chloroplast	K02717	psbP; photosystem II oxygen-evolving enhancer protein 2	map00195 Photosynthesis		GO:0005622 intracellular; GO:0005623 cell; GO:0005737 cytoplasm; GO:0009507 chloroplast; GO:0009534 chloroplast thylakoid; GO:0009535 chloroplast thylakoid membrane; GO:0009536 plastid; GO:0009579 thylakoid; GO:0016020 membrane; GO:0031976 plastid thylakoid; GO:0031984 organelle subcompartment; GO:0034357 photosynthetic membrane; GO:0042651 thylakoid membrane; GO:0043226 organelle; GO:0043227 mem…		PF01789	PsbP
A0A1U8FVZ3	Plant intracellular Ras-group-related LRR protein 7 OS=Capsicum annuum OX=4072 GN=T459_10374 PE=4 SV=1	T459_10374	28.7	0.952	1.006	0.965	0.976	1.03	1.076	1.089	0.93	0.919	0.962	1.046	1.061	0.982	0.994	1.054	0.938	0.98	1.058	0.948	0.184303	0.957	0.505825	1.018	0.674233	nucleus									S	KOG0619	FOG: Leucine rich repeat
A0A2G2ZB55	Vesicle-fusing ATPase OS=Capsicum annuum OX=4072 GN=T459_17193 PE=3 SV=1	T459_17193	74.7	1.033	1.04	1.045	0.954	0.959	0.97	0.958	0.95	0.966	1.041	1.051	1.038	0.912	0.899	0.913	1.102	1.089	1.11	1.082	0.000191177	0.918	0.000152914	0.825	1.35676e-05	cytoplasm	K06027	NSF, SEC18; vesicle-fusing ATPase [EC:3.6.4.6]			GO:0005622 intracellular; GO:0005623 cell; GO:0005737 cytoplasm; GO:0005773 vacuole; GO:0005794 Golgi apparatus; GO:0005886 plasma membrane; GO:0005911 cell-cell junction; GO:0009506 plasmodesma; GO:0012505 endomembrane system; GO:0016020 membrane; GO:0030054 cell junction; GO:0043226 organelle; GO:0043227 membrane-bounded organelle; GO:0043229 intracellular organelle; GO:0043231 intracellular me…		PF00004	ATPase family associated with various cellular activities (AAA)	O	KOG0741	AAA+-type ATPase
A0A2G3ACM1	CaM_binding domain-containing protein OS=Capsicum annuum OX=4072 GN=T459_07036 PE=4 SV=1	T459_07036	76.8	1.2	1.002	0.927	0.89	0.895	1.093													1.087	0.464848					nucleus							PF07839	Plant calmodulin-binding domain
A0A1U8HKE2	Protein MEI2-like 5 OS=Capsicum annuum OX=4072 GN=T459_20415 PE=4 SV=1	T459_20415	93																									cytoplasm							PF00076	RNA recognition motif. (a.k.a. RRM, RBD, or RNP domain)	A	KOG4660	Protein Mei2, essential for commitment to meiosis, and related proteins
A0A1U8FPY1	solute carrier family 25 member 44 isoform X1(predicted) OS=Capsicum annuum OX=4072 GN=T459_06738 PE=3 SV=1	T459_06738	34.6	0.935	1.037	0.976	1.006	1.006	1.035	0.918	1.006	1.009	0.985	1.027	1.06	1.005	0.88	0.931	1.05	1.027	1.068	0.968	0.343028	0.955	0.281181	0.895	0.049423	cytoplasm	K15121	SLC25A44; solute carrier family 25, member 44		GO:0006810 transport; GO:0006839 mitochondrial transport; GO:0051179 localization; GO:0051234 establishment of localization; GO:0055085 transmembrane transport;	GO:0005622 intracellular; GO:0005623 cell; GO:0005737 cytoplasm; GO:0005739 mitochondrion; GO:0005740 mitochondrial envelope; GO:0005741 mitochondrial outer membrane; GO:0005743 mitochondrial inner membrane; GO:0016020 membrane; GO:0016021 integral component of membrane; GO:0019866 organelle inner membrane; GO:0019867 outer membrane; GO:0031090 organelle membrane; GO:0031224 intrinsic component o…	GO:0005215 transporter activity; GO:0022857 transmembrane transporter activity;			C	KOG0765	Predicted mitochondrial carrier protein
A0A2G3AAD0	Putative ovule protein(predicted) OS=Capsicum annuum OX=4072 GN=T459_06273 PE=4 SV=1	T459_06273	71.7	1	0.964	0.994	1.017	1.044	1.031	1.063	1.061	1.015	0.978	0.98	0.934	0.97	0.992	1.047	1.004	0.958	1.024	0.957	0.0312938	1.085	0.0197074	1.008	0.814239	nucleus
A0A1U8DS55	Lactoylglutathione lyase OS=Capsicum annuum OX=4072 GN=T459_21573 PE=3 SV=1	T459_21573	40.3	1.007	0.968	0.992	1.009	1.025	1.001	0.997	1.016	0.982	0.996	0.998	0.964	1.006	0.986	1.068	0.995	0.957	0.976	0.978	0.16616	1.013	0.451146	1.045	0.174869	chloroplast,mitochondria	K01759	GLO1, gloA; lactoylglutathione lyase [EC:4.4.1.5]	map00620 Pyruvate metabolism; map01100 Metabolic pathways				PF00903	Glyoxalase/Bleomycin resistance protein/Dioxygenase superfamily	G	KOG2943	Predicted glyoxalase
A0A1U8FLJ7	Vacuolar protein sorting-associated protein 28 homolog OS=Capsicum annuum OX=4072 GN=T459_05847 PE=3 SV=1	T459_05847	23.3	0.987	0.986	0.979	1.024	1.012	1.014	1.044	1.043	1.021	0.918	1	0.956	1.088	0.995	0.926	0.988	1.048	0.964	0.968	0.00184374	1.081	0.0376357	1.003	0.979645	chloroplast	K12184	VPS28; ESCRT-I complex subunit VPS28	map04144 Endocytosis	GO:0006508 proteolysis; GO:0006511 ubiquitin-dependent protein catabolic process; GO:0006807 nitrogen compound metabolic process; GO:0006810 transport; GO:0006886 intracellular protein transport; GO:0007034 vacuolar transport; GO:0008104 protein localization; GO:0008152 metabolic process; GO:0009056 catabolic process; GO:0009057 macromolecule catabolic process; GO:0009987 cellular process; GO:001…	GO:0000813 ESCRT I complex; GO:0005622 intracellular; GO:0005623 cell; GO:0005737 cytoplasm; GO:0005768 endosome; GO:0005794 Golgi apparatus; GO:0005802 trans-Golgi network; GO:0010008 endosome membrane; GO:0012505 endomembrane system; GO:0016020 membrane; GO:0031090 organelle membrane; GO:0031410 cytoplasmic vesicle; GO:0031982 vesicle; GO:0031984 organelle subcompartment; GO:0032991 protein-con…				U	KOG3284	Vacuolar sorting protein VPS28
A0A1U8GK54	FSH1 domain-containing protein OS=Capsicum annuum OX=4072 GN=T459_12762 PE=4 SV=1	T459_12762	29.4	0.965	0.958	0.937	1.078	1.044	1.025	1.015	1.026	1.096	0.987	0.93	0.954	1.076	1.054	1.036	0.943	0.928	0.973	0.909	0.00513758	1.093	0.0403552	1.113	0.00373397	chloroplast							PF03959	Serine hydrolase (FSH1)	E	KOG2551	Phospholipase/carboxyhydrolase
A0A1U8GG90	Putative aquaporin PIP-type pTOM75 OS=Capsicum annuum OX=4072 GN=T459_00271 PE=3 SV=1	T459_00271	30.6	1.095	1.072	0.917	0.924	1.002	1.02	0.994	0.994	0.958	1.035	1.038	1.009	0.976	1.053	1.046	0.977	1.006	0.976	1.047	0.530872	0.956	0.0413065	1.039	0.22128	plasma membrane	K09872	PIP; aquaporin PIP		GO:0006810 transport; GO:0006811 ion transport; GO:0006833 water transport; GO:0034220 ion transmembrane transport; GO:0042044 fluid transport; GO:0051179 localization; GO:0051234 establishment of localization; GO:0055085 transmembrane transport;	GO:0005623 cell; GO:0005886 plasma membrane; GO:0005887 integral component of plasma membrane; GO:0016020 membrane; GO:0016021 integral component of membrane; GO:0031224 intrinsic component of membrane; GO:0031226 intrinsic component of plasma membrane; GO:0071944 cell periphery;	GO:0005215 transporter activity; GO:0005372 water transmembrane transporter activity; GO:0015250 water channel activity; GO:0015267 channel activity; GO:0015318 inorganic molecular entity transmembrane transporter activity; GO:0022803 passive transmembrane transporter activity; GO:0022857 transmembrane transporter activity;			P	KOG0223	Aquaporin (major intrinsic protein family)
A0A1U8HCY3	Putative fiber protein Fb34-like(predicted) OS=Capsicum annuum OX=4072 GN=T459_20655 PE=4 SV=1	T459_20655	20.1	0.964	1.058	0.949	1.049	1.004	0.984	0.926	1.06	0.911	1.034	0.994	1.08	1.006	0.931	0.963	1.156	0.939	1.022	0.978	0.589022	0.932	0.250349	0.93	0.344252	vacuolar membrane
A0A2G3A628	Hypersensitive-induced response protein 4 OS=Capsicum annuum OX=4072 GN=T459_04791 PE=4 SV=1	T459_04791	38.5	0.994	0.991	1.049	0.954	0.939	0.972	0.948	0.944	0.988	1.031	1.064	1.072	1.063	1.039	1.079	0.928	0.956	0.939	1.059	0.0531202	0.909	0.00721542	1.127	0.00103219	nucleus									C	KOG2620	Prohibitins and stomatins of the PID superfamily
A0A2G3AH02	Putative ovule protein(predicted) OS=Capsicum annuum OX=4072 GN=T459_01408 PE=4 SV=1	T459_01408	26.5	0.867	1.121	0.936	1.143	0.946	0.993													0.949	0.591918					cytoplasm
A0A2G2Z7G6	putative G3BP-like protein isoform X2(predicted) OS=Capsicum annuum OX=4072 GN=T459_15999 PE=4 SV=1	T459_15999	45.6	1.005	0.976	1.02	0.968	1.006	1.039	0.947	1.025	1.039	0.947	0.932	1.019	0.998	1.022	1.009	0.98	1.028	0.926	0.996	0.88474	1.039	0.392596	1.032	0.350233	chloroplast							PF02136; PF00076	Nuclear transport factor 2 (NTF2) domain; RNA recognition motif. (a.k.a. RRM, RBD, or RNP domain)	A	KOG0116	RasGAP SH3 binding protein rasputin, contains NTF2 and RRM domains
A0A2G3A3H1	Coatomer subunit beta'-1 (Fragment) OS=Capsicum annuum OX=4072 GN=T459_10881 PE=4 SV=1	T459_10881	103.3	1.087	1.056	1.097	0.908	0.944	0.825	0.947	0.893	0.993	0.95	1.023	1.053	0.851	0.824	0.848	1.104	1.175	1.23	1.21	0.00989905	0.936	0.203295	0.719	0.000564767	cytoplasm	K17302	COPB2, SEC27; coatomer subunit beta'		GO:0006810 transport; GO:0006886 intracellular protein transport; GO:0006888 endoplasmic reticulum to Golgi vesicle-mediated transport; GO:0006890 retrograde vesicle-mediated transport, Golgi to endoplasmic reticulum; GO:0006891 intra-Golgi vesicle-mediated transport; GO:0008104 protein localization; GO:0015031 protein transport; GO:0015833 peptide transport; GO:0016192 vesicle-mediated transport…	GO:0005622 intracellular; GO:0005623 cell; GO:0005737 cytoplasm; GO:0005794 Golgi apparatus; GO:0005798 Golgi-associated vesicle; GO:0005829 cytosol; GO:0012505 endomembrane system; GO:0012506 vesicle membrane; GO:0016020 membrane; GO:0030117 membrane coat; GO:0030120 vesicle coat; GO:0030126 COPI vesicle coat; GO:0030135 coated vesicle; GO:0030137 COPI-coated vesicle; GO:0030659 cytoplasmic vesi…				U	KOG0276	Vesicle coat complex COPI, beta' subunit
A0A2G2ZQ59	Putative dna-directed rna polymerase i subunit rpa2-like(predicted) OS=Capsicum annuum OX=4072 GN=T459_12562 PE=4 SV=1	T459_12562	32.7	0.847	1.006	0.914	1.085	1.079	1.076	1.062	0.881	1.086	0.867	1.011	1.099							0.854	0.0323866	1.017	0.862132			chloroplast
A0A1U8E1N8	MLO-like protein OS=Capsicum annuum OX=4072 GN=MLO PE=3 SV=1	MLO	53.8	1.102	1.064	1.031	0.955	0.894	0.961													1.138	0.0126861					cytoplasm	K08472	MLO; mlo protein		GO:0006950 response to stress; GO:0006952 defense response; GO:0050896 response to stimulus;	GO:0005623 cell; GO:0005886 plasma membrane; GO:0016020 membrane; GO:0071944 cell periphery;				I	KOG0017	FOG: Transposon-encoded proteins with TYA, reverse transcriptase, integrase domains in various combinations
A0A2G3ADL8	Endoglucanase OS=Capsicum annuum OX=4072 GN=T459_00218 PE=3 SV=1	T459_00218	46.3	0.99	1.021	0.994	0.985	1.034	0.981	1.076	1.098	1.058	0.916	0.994	0.939	1.132	1.09	1.106	0.921	0.899	0.906	1.002	0.928561	1.134	0.00874765	1.221	0.000108978	chloroplast							PF00759	Glycosyl hydrolase family 9
A0A1U8GBW7	probable pre-mRNA-splicing factor ATP-dependent RNA helicase DEAH9 isoform X2(predicted) OS=Capsicum annuum OX=4072 GN=T459_28500 PE=4 SV=1	T459_28500	77.2	1.128	1.059	1.117	0.853	0.982	0.872	0.793	1.061	1.119	0.998	0.939	1.095	1.095	0.869	0.941	0.97	1.124	1.148	1.221	0.0138045	0.981	0.816744	0.896	0.264272	chloroplast	K13117	DHX35; ATP-dependent RNA helicase DDX35 [EC:3.6.4.13]		GO:0000375 RNA splicing, via transesterification reactions; GO:0000377 RNA splicing, via transesterification reactions with bulged adenosine as nucleophile; GO:0000398 mRNA splicing, via spliceosome; GO:0006139 nucleobase-containing compound metabolic process; GO:0006396 RNA processing; GO:0006397 mRNA processing; GO:0006725 cellular aromatic compound metabolic process; GO:0006807 nitrogen compou…	GO:0005622 intracellular; GO:0005623 cell; GO:0005634 nucleus; GO:0005681 spliceosomal complex; GO:0005737 cytoplasm; GO:0005829 cytosol; GO:0005911 cell-cell junction; GO:0009506 plasmodesma; GO:0030054 cell junction; GO:0032991 protein-containing complex; GO:0043226 organelle; GO:0043227 membrane-bounded organelle; GO:0043229 intracellular organelle; GO:0043231 intracellular membrane-bounded or…	GO:0003676 nucleic acid binding; GO:0003723 RNA binding; GO:0003724 RNA helicase activity; GO:0003824 catalytic activity; GO:0004386 helicase activity; GO:0005488 binding; GO:0008186 RNA-dependent ATPase activity; GO:0016462 pyrophosphatase activity; GO:0016787 hydrolase activity; GO:0016817 hydrolase activity, acting on acid anhydrides; GO:0016818 hydrolase activity, acting on acid anhydrides, i…	PF04408; PF07717	Helicase associated domain (HA2); Oligonucleotide/oligosaccharide-binding (OB)-fold	A	KOG0922	DEAH-box RNA helicase
A0A2G3A2X5	Chaperone protein ClpC1, chloroplastic OS=Capsicum annuum OX=4072 GN=T459_10684 PE=3 SV=1	T459_10684	69.2	1.028	1.02	1.02	0.966	0.968	0.992	1.06	1.054	1.029	0.942	0.923	0.958	1.046	1.04	1.061	0.954	0.958	0.957	1.049	0.00600014	1.113	0.00158986	1.097	0.000108589	cytoplasm	K03696	clpC; ATP-dependent Clp protease ATP-binding subunit ClpC					PF00004; PF07724; PF10431	ATPase family associated with various cellular activities (AAA); AAA domain (Cdc48 subfamily); C-terminal, D2-small domain, of ClpB protein	O	KOG1051	Chaperone HSP104 and related ATP-dependent Clp proteases
A0A2G2ZD99	beta-glucosidase BoGH3B-like(predicted) OS=Capsicum annuum OX=4072 GN=T459_18028 PE=4 SV=1	T459_18028	68	0.982	0.968	1.034	0.993	1.006	1.043	1.031	1.028	1.01	0.957	0.949	0.96	1.072	1.106	1.103	0.863	0.912	0.938	0.981	0.477653	1.071	0.000719401	1.209	0.00196245	plasma membrane	K05349	bglX; beta-glucosidase [EC:3.2.1.21]	map00460 Cyanoamino acid metabolism; map00500 Starch and sucrose metabolism; map00940 Phenylpropanoid biosynthesis; map01100 Metabolic pathways; map01110 Biosynthesis of secondary metabolites				PF00933; PF01915	Glycosyl hydrolase family 3 N terminal domain; Glycosyl hydrolase family 3 C-terminal domain
A0A1U8H521	Protein LOW PSII ACCUMULATION 3, chloroplastic OS=Capsicum annuum OX=4072 GN=T459_17547 PE=4 SV=1	T459_17547	43.4	0.9	0.838	0.888	1.148	1.068	1.164	0.9	0.928	0.89	1.103	1.076	1.108	0.995	0.962	1.027	1.021	1.005	0.998	0.777	0.00186747	0.827	0.00025133	0.987	0.533928	chloroplast				GO:0009719 response to endogenous stimulus; GO:0009725 response to hormone; GO:0009735 response to cytokinin; GO:0010033 response to organic substance; GO:0042221 response to chemical; GO:0050896 response to stimulus;	GO:0005622 intracellular; GO:0005623 cell; GO:0005737 cytoplasm; GO:0009507 chloroplast; GO:0009532 plastid stroma; GO:0009536 plastid; GO:0009570 chloroplast stroma; GO:0043226 organelle; GO:0043227 membrane-bounded organelle; GO:0043229 intracellular organelle; GO:0043231 intracellular membrane-bounded organelle;		PF09353	Domain of unknown function (DUF1995)
A0A2G3A7K3	Protein MEI2-like 5 OS=Capsicum annuum OX=4072 GN=T459_05283 PE=4 SV=1	T459_05283	92.8	1.052	0.967	0.937	1.031	1.017	0.984	1.088	1.03	0.951	1.033	0.948	0.959							0.975	0.517404	1.044	0.424473			nucleus				GO:0010564 regulation of cell cycle process; GO:0010638 positive regulation of organelle organization; GO:0033043 regulation of organelle organization; GO:0040008 regulation of growth; GO:0040020 regulation of meiotic nuclear division; GO:0045787 positive regulation of cell cycle; GO:0045836 positive regulation of meiotic nuclear division; GO:0045927 positive regulation of growth; GO:0048518 posi…	GO:0005622 intracellular; GO:0005623 cell; GO:0005634 nucleus; GO:0043226 organelle; GO:0043227 membrane-bounded organelle; GO:0043229 intracellular organelle; GO:0043231 intracellular membrane-bounded organelle;	GO:0003676 nucleic acid binding; GO:0003723 RNA binding; GO:0003729 mRNA binding; GO:0005488 binding; GO:0097159 organic cyclic compound binding; GO:1901363 heterocyclic compound binding;	PF00076	RNA recognition motif. (a.k.a. RRM, RBD, or RNP domain)	D	KOG4660	Protein Mei2, essential for commitment to meiosis, and related proteins
A0A2G2ZEV1	Pre-mRNA-splicing factor SLU7 OS=Capsicum annuum OX=4072 GN=T459_18477 PE=4 SV=1	T459_18477	63.5	1.04	1.065	1.053	0.939	0.936	0.987	1.15	1.049	1.044	0.969	0.909	1.032	0.978	0.958	1.03	0.999	1.07	0.973	1.103	0.00594642	1.114	0.0875991	0.975	0.521773	chloroplast	K12819	SLU7; pre-mRNA-processing factor SLU7	map03040 Spliceosome		GO:0005622 intracellular; GO:0005623 cell; GO:0005634 nucleus; GO:0005681 spliceosomal complex; GO:0032991 protein-containing complex; GO:0043226 organelle; GO:0043227 membrane-bounded organelle; GO:0043229 intracellular organelle; GO:0043231 intracellular membrane-bounded organelle; GO:1990904 ribonucleoprotein complex;		PF11708	Pre-mRNA splicing Prp18-interacting factor	A	KOG2560	RNA splicing factor - Slu7p
A0A2G2Z8Y3	Pectinesterase OS=Capsicum annuum OX=4072 GN=T459_16524 PE=3 SV=1	T459_16524	66.3	1.058	1.046	1.012	0.978	0.959	0.985	1.018	1.01	1.072	0.952	0.958	0.988	1.134	1.094	1.154	0.865	0.864	0.903	1.066	0.0145169	1.07	0.0375272	1.285	0.000303833	chloroplast				GO:0010119 regulation of stomatal movement; GO:0043086 negative regulation of catalytic activity; GO:0044092 negative regulation of molecular function; GO:0050789 regulation of biological process; GO:0050790 regulation of catalytic activity; GO:0050794 regulation of cellular process; GO:0065007 biological regulation; GO:0065009 regulation of molecular function;	GO:0005618 cell wall; GO:0005623 cell; GO:0005886 plasma membrane; GO:0009505 plant-type cell wall; GO:0016020 membrane; GO:0030312 external encapsulating structure; GO:0071944 cell periphery;	GO:0003824 catalytic activity; GO:0004857 enzyme inhibitor activity; GO:0016787 hydrolase activity; GO:0016788 hydrolase activity, acting on ester bonds; GO:0030234 enzyme regulator activity; GO:0030599 pectinesterase activity; GO:0046910 pectinesterase inhibitor activity; GO:0052689 carboxylic ester hydrolase activity; GO:0098772 molecular function regulator;	PF04043	Plant invertase/pectin methylesterase inhibitor
A0A2G2ZVW1	Hydrolase_4 domain-containing protein OS=Capsicum annuum OX=4072 GN=T459_08219 PE=4 SV=1	T459_08219	40.1	0.992	0.872	1.085	1.028	1.06	0.966	1.004	0.954	1.024	1.06	1.006	0.96							0.966	0.609295	0.985	0.708673			cytoplasm	K01054	MGLL; acylglycerol lipase [EC:3.1.1.23]	map00561 Glycerolipid metabolism; map01100 Metabolic pathways						I	KOG1455	Lysophospholipase
A0A1U8GMM7	Transcription elongation factor SPT4 homolog OS=Capsicum annuum OX=4072 GN=T459_14193 PE=3 SV=1	T459_14193	13.4	0.933	0.956	0.985	1.064	1.04	1.027	0.8	0.941	0.89	1.038	1.131	1.147	0.768	0.726	0.751	1.302	1.252	1.202	0.918	0.0103067	0.793	0.0150169	0.598	5.36957e-05	chloroplast	K15171	SUPT4H1, SPT4; transcription elongation factor SPT4					PF06093	Spt4/RpoE2 zinc finger	K	KOG3490	Transcription elongation factor SPT4
A0A1U8GQF3	GDSL esterase/lipase OS=Capsicum annuum OX=4072 GN=T459_33903 PE=3 SV=1	T459_33903	46.6	0.954	1.032	1.04	0.99	0.944	0.987	1.072	1.088	1.05	0.968	0.934	0.958	1.076	1.162	1.138	0.856	0.908	0.867	1.036	0.332256	1.122	0.00145723	1.283	0.00102475	chloroplast					GO:0005622 intracellular; GO:0005623 cell; GO:0005737 cytoplasm; GO:0009507 chloroplast; GO:0009532 plastid stroma; GO:0009536 plastid; GO:0009570 chloroplast stroma; GO:0043226 organelle; GO:0043227 membrane-bounded organelle; GO:0043229 intracellular organelle; GO:0043231 intracellular membrane-bounded organelle;
A0A1U8GC41	Importin beta-like SAD2 OS=Capsicum annuum OX=4072 GN=T459_07271 PE=4 SV=1	T459_07271	118.9	1.052	1.136	1.124	0.883	0.89	0.905	1.027	0.94	0.952	1.03	1.012	1.081	0.956	0.936	0.989	1.053	1.05	1.043	1.237	0.00107783	0.935	0.115969	0.916	0.00562737	chloroplast	K20223	IPO7, RANBP7; importin-7		GO:0006606 protein import into nucleus; GO:0006810 transport; GO:0006886 intracellular protein transport; GO:0006913 nucleocytoplasmic transport; GO:0007154 cell communication; GO:0007165 signal transduction; GO:0008104 protein localization; GO:0009892 negative regulation of metabolic process; GO:0009987 cellular process; GO:0010468 regulation of gene expression; GO:0010605 negative regulation of…	GO:0005622 intracellular; GO:0005623 cell; GO:0005634 nucleus; GO:0005635 nuclear envelope; GO:0005737 cytoplasm; GO:0005829 cytosol; GO:0012505 endomembrane system; GO:0031967 organelle envelope; GO:0031975 envelope; GO:0043226 organelle; GO:0043227 membrane-bounded organelle; GO:0043229 intracellular organelle; GO:0043231 intracellular membrane-bounded organelle;	GO:0005215 transporter activity;			UY	KOG1991	Nuclear transport receptor RANBP7/RANBP8 (importin beta superfamily)
A0A1U8H2N8	Transcription elongation factor B polypeptide 1 OS=Capsicum annuum OX=4072 GN=T459_18285 PE=3 SV=1	T459_18285	16.3	1.016	0.828	1.057	1.018	0.914	1.172													0.935	0.550379					chloroplast	K03872	ELOC, TCEB1; elongin-C	map04120 Ubiquitin mediated proteolysis	GO:0006355 regulation of transcription, DNA-templated; GO:0006357 regulation of transcription by RNA polymerase II; GO:0009889 regulation of biosynthetic process; GO:0009891 positive regulation of biosynthetic process; GO:0009893 positive regulation of metabolic process; GO:0010468 regulation of gene expression; GO:0010556 regulation of macromolecule biosynthetic process; GO:0010557 positive regu…	GO:0000151 ubiquitin ligase complex; GO:0000153 cytoplasmic ubiquitin ligase complex; GO:0005622 intracellular; GO:0005623 cell; GO:0005634 nucleus; GO:0005654 nucleoplasm; GO:0005737 cytoplasm; GO:0008023 transcription elongation factor complex; GO:0030891 VCB complex; GO:0031974 membrane-enclosed lumen; GO:0031981 nuclear lumen; GO:0032991 protein-containing complex; GO:0043226 organelle; GO:00…	GO:0005488 binding; GO:0044877 protein-containing complex binding;	PF03931	Skp1 family, tetramerisation domain	K	KOG3473	RNA polymerase II transcription elongation factor Elongin/SIII, subunit elongin C
A0A2G3AEH8	Elongation factor G OS=Capsicum annuum OX=4072 GN=T459_00523 PE=4 SV=1	T459_00523	61.3	0.98	0.995	1.015	1.056	1.017	0.995	1.025	1.035	1.014	0.98	0.992	1.023	1.07	1.06	1.076	0.95	0.968	0.963	0.975	0.273099	1.026	0.136739	1.113	0.000113494	cytoplasm	K02355	fusA, GFM, EFG; elongation factor G					PF00009; PF03144; PF03764; PF00679	Elongation factor Tu GTP binding domain; Elongation factor Tu domain 2; Elongation factor G, domain IV; Elongation factor G C-terminus	J	KOG0465	Mitochondrial elongation factor
A0A2G2Z8L0	Ubiquitin-like domain-containing protein (Fragment) OS=Capsicum annuum OX=4072 GN=T459_16395 PE=4 SV=1	T459_16395	73.8	1.069	0.911	1.022	0.946	0.966	1.092	1.011	1.055	1.062	1.011	0.92	0.897	0.998	0.923	1.019	1.002	0.99	1.073	0.999	0.989925	1.106	0.0614428	0.959	0.345155	nucleus	K23390	BAG6; large proline-rich protein BAG6					PF00240	Ubiquitin family	O	KOG4248	Ubiquitin-like protein, regulator of apoptosis
A0A1U8FVM4	ERAD-associated E3 ubiquitin-protein ligase component HRD3 OS=Capsicum annuum OX=4072 GN=T459_10714 PE=4 SV=1	T459_10714	75.6	1.018	1.038	1.046	0.962	0.962	0.914	0.968	1.089	0.998	0.937	0.998	1.032	0.928	0.973	0.85	1.099	1.029	1.069	1.093	0.00914349	1.03	0.559407	0.86	0.026153	mitochondria	K14026	SEL1, SEL1L; SEL1 protein	map04141 Protein processing in endoplasmic reticulum	GO:0002790 peptide secretion; GO:0006508 proteolysis; GO:0006511 ubiquitin-dependent protein catabolic process; GO:0006629 lipid metabolic process; GO:0006638 neutral lipid metabolic process; GO:0006639 acylglycerol metabolic process; GO:0006641 triglyceride metabolic process; GO:0006807 nitrogen compound metabolic process; GO:0006810 transport; GO:0006950 response to stress; GO:0006970 response …	GO:0000151 ubiquitin ligase complex; GO:0000153 cytoplasmic ubiquitin ligase complex; GO:0000835 ER ubiquitin ligase complex; GO:0000836 Hrd1p ubiquitin ligase complex; GO:0000839 Hrd1p ubiquitin ligase ERAD-L complex; GO:0005622 intracellular; GO:0005623 cell; GO:0005737 cytoplasm; GO:0005783 endoplasmic reticulum; GO:0005789 endoplasmic reticulum membrane; GO:0012505 endomembrane system; GO:001…				MOT	KOG1550	Extracellular protein SEL-1 and related proteins
A0A1U8G1T6	Kinesin-related protein 11 OS=Capsicum annuum OX=4072 GN=T459_08717 PE=3 SV=1	T459_08717	112.3	0.998	1.032	1.006	1.016	0.983	0.971	0.981	0.966	1.053	1.006	0.946	1.054	1.072	0.83	1.086	1.12	0.906	0.994	1.022	0.261391	0.998	0.968386	0.989	0.900053	chloroplast	K11498	CENPE; centromeric protein E		GO:0006928 movement of cell or subcellular component; GO:0007017 microtubule-based process; GO:0007018 microtubule-based movement; GO:0009987 cellular process;	GO:0005622 intracellular; GO:0005623 cell; GO:0005856 cytoskeleton; GO:0005871 kinesin complex; GO:0005874 microtubule; GO:0005875 microtubule associated complex; GO:0015630 microtubule cytoskeleton; GO:0032991 protein-containing complex; GO:0035371 microtubule plus-end; GO:0043226 organelle; GO:0043228 non-membrane-bounded organelle; GO:0043229 intracellular organelle; GO:0043232 intracellular n…	GO:0000166 nucleotide binding; GO:0000287 magnesium ion binding; GO:0003774 motor activity; GO:0003777 microtubule motor activity; GO:0003824 catalytic activity; GO:0005488 binding; GO:0005515 protein binding; GO:0016462 pyrophosphatase activity; GO:0016787 hydrolase activity; GO:0016817 hydrolase activity, acting on acid anhydrides; GO:0016818 hydrolase activity, acting on acid anhydrides, in ph…	PF00225	Kinesin motor domain	Z	KOG0242	Kinesin-like protein
A0A2G2YK41	proteasome-associated protein ECM29 homolog isoform X1(predicted) OS=Capsicum annuum OX=4072 GN=T459_25220 PE=4 SV=1	T459_25220	200.6	1.061	1.055	1.087	0.936	0.922	0.939	0.911	0.93	0.926	1.065	1.037	1.07	0.788	0.802	0.784	1.174	1.218	1.177	1.145	0.00022859	0.872	0.000298637	0.665	7.62442e-06	nucleus	K11886	ECM29; proteasome component ECM29							S	KOG0915	Uncharacterized conserved protein
A0A1U8FYB3	Serine/threonine-protein kinase TIO OS=Capsicum annuum OX=4072 GN=T459_09761 PE=4 SV=1	T459_09761	143.7																									plasma membrane	K06228	FU; fused [EC:2.7.11.1]		GO:0000003 reproduction; GO:0000278 mitotic cell cycle; GO:0000280 nuclear division; GO:0000281 mitotic cytokinesis; GO:0000910 cytokinesis; GO:0000911 cytokinesis by cell plate formation; GO:0001101 response to acid chemical; GO:0006355 regulation of transcription, DNA-templated; GO:0006464 cellular protein modification process; GO:0006468 protein phosphorylation; GO:0006793 phosphorus metabolic…	GO:0005622 intracellular; GO:0005623 cell; GO:0005634 nucleus; GO:0005737 cytoplasm; GO:0005829 cytosol; GO:0005856 cytoskeleton; GO:0005874 microtubule; GO:0005881 cytoplasmic microtubule; GO:0009524 phragmoplast; GO:0015630 microtubule cytoskeleton; GO:0043226 organelle; GO:0043227 membrane-bounded organelle; GO:0043228 non-membrane-bounded organelle; GO:0043229 intracellular organelle; GO:0043…	GO:0000166 nucleotide binding; GO:0003824 catalytic activity; GO:0004672 protein kinase activity; GO:0004674 protein serine/threonine kinase activity; GO:0005488 binding; GO:0005515 protein binding; GO:0005524 ATP binding; GO:0008092 cytoskeletal protein binding; GO:0008134 transcription factor binding; GO:0008144 drug binding; GO:0016301 kinase activity; GO:0016740 transferase activity; GO:00167…	PF00069	Protein kinase domain	T	KOG0597	Serine-threonine protein kinase FUSED
A0A1U8GTK8	arabinosyltransferase XEG113(predicted) OS=Capsicum annuum OX=4072 GN=T459_01075 PE=4 SV=1	T459_01075	72.1	0.988	0.96	0.99	0.982	1.055	1.018	0.965	1.072	0.948	0.982	1.072	1.035	1.06	1.021	1.001	1.021	0.955	0.916	0.962	0.167007	0.966	0.488531	1.066	0.146585	plasma membrane	K20784	XEG113; arabinosyltransferase [EC:2.4.2.-]	map00514 Other types of O-glycan biosynthesis
A0A2G2YIF1	WPP domain-interacting protein 1(predicted) OS=Capsicum annuum OX=4072 GN=T459_24636 PE=4 SV=1	T459_24636	64.4	0.955	1.017	1.026	1.014	0.943	1.051	0.914	0.974	1.045	1.037	1.043	0.992							0.997	0.94584	0.955	0.318799			nucleus				GO:0006996 organelle organization; GO:0006997 nucleus organization; GO:0009987 cellular process; GO:0016043 cellular component organization; GO:0071840 cellular component organization or biogenesis;	GO:0005622 intracellular; GO:0005623 cell; GO:0005634 nucleus; GO:0005635 nuclear envelope; GO:0005737 cytoplasm; GO:0009504 cell plate; GO:0012505 endomembrane system; GO:0031967 organelle envelope; GO:0031975 envelope; GO:0043226 organelle; GO:0043227 membrane-bounded organelle; GO:0043229 intracellular organelle; GO:0043231 intracellular membrane-bounded organelle;	GO:0005488 binding; GO:0005515 protein binding; GO:0042802 identical protein binding; GO:0042803 protein homodimerization activity; GO:0046982 protein heterodimerization activity; GO:0046983 protein dimerization activity;
A0A2G2YAL7	Ubiquitin carboxyl-terminal hydrolase 19 (Fragment) OS=Capsicum annuum OX=4072 GN=T459_31223 PE=4 SV=1	T459_31223	85.6	0.967	0.988	1.06	1.024	0.988	0.978													1.008	0.81518					nucleus	K11855	USP36_42; ubiquitin carboxyl-terminal hydrolase 36/42 [EC:3.4.19.12]							O	KOG1865	Ubiquitin carboxyl-terminal hydrolase
A0A2G2YU12	LOB domain-containing protein 2 OS=Capsicum annuum OX=4072 GN=T459_23896 PE=4 SV=1	T459_23896	24	0.899	0.863	0.93	1.124	1.078	1.114													0.812	0.00113638					peroxisome
A0A2G2ZQB7	Delta(8)-fatty-acid desaturase OS=Capsicum annuum OX=4072 GN=T459_12622 PE=4 SV=1	T459_12622	51.6	1.015	0.986	1.02	1.013	1.02	0.968	1.049	1.08	0.981	0.981	0.959	0.9	1.087	1.121	1.113	0.903	0.965	0.897	1.007	0.745265	1.095	0.0776056	1.201	0.00185863	plasma membrane	K21737	ACET6, DES6; acyl-lipid Delta6-acetylenase / acyl-lipid (9-3)-desaturase [EC:1.14.19.38 1.14.19.47]					PF00173; PF00487	Cytochrome b5-like Heme/Steroid binding domain; Fatty acid desaturase	I	KOG4232	Delta 6-fatty acid desaturase/delta-8 sphingolipid desaturase
A0A1U8E3H8	Vesicle-associated protein 1-3 OS=Capsicum annuum OX=4072 GN=T459_02927 PE=4 SV=1	T459_02927	38.9	1.076	1.042	1.047	0.931	0.939	0.976	1.002	0.932	0.979	1.017	1.021	1.087	0.974	0.954	1.007	0.996	0.993	1.084	1.112	0.00380753	0.932	0.081617	0.955	0.2385	cytoplasm				GO:0006810 transport; GO:0046907 intracellular transport; GO:0051179 localization; GO:0051234 establishment of localization; GO:0051641 cellular localization; GO:0051649 establishment of localization in cell;	GO:0005622 intracellular; GO:0005623 cell; GO:0005737 cytoplasm; GO:0005783 endoplasmic reticulum; GO:0005789 endoplasmic reticulum membrane; GO:0005886 plasma membrane; GO:0012505 endomembrane system; GO:0016020 membrane; GO:0031984 organelle subcompartment; GO:0042175 nuclear outer membrane-endoplasmic reticulum membrane network; GO:0043226 organelle; GO:0043227 membrane-bounded organelle; GO:0…		PF00635	MSP (Major sperm protein) domain	U	KOG0439	VAMP-associated protein involved in inositol metabolism
A0A1U8FZK2	Mediator of RNA polymerase II transcription subunit 21 OS=Capsicum annuum OX=4072 GN=T459_09372 PE=3 SV=1	T459_09372	15.2	1.068	1.042	1.023	1.018	0.932	0.923	1.036	1.096	1.005	0.957	0.966	0.997							1.09	0.0596992	1.074	0.0653747			cytoplasm	K15152	MED21, SRB7; mediator of RNA polymerase II transcription subunit 21		GO:0002376 immune system process; GO:0006355 regulation of transcription, DNA-templated; GO:0006950 response to stress; GO:0006952 defense response; GO:0006955 immune response; GO:0009605 response to external stimulus; GO:0009607 response to biotic stimulus; GO:0009620 response to fungus; GO:0009814 defense response, incompatible interaction; GO:0009817 defense response to fungus, incompatible in…	GO:0005622 intracellular; GO:0005623 cell; GO:0005634 nucleus; GO:0005654 nucleoplasm; GO:0016592 mediator complex; GO:0031974 membrane-enclosed lumen; GO:0031981 nuclear lumen; GO:0032991 protein-containing complex; GO:0043076 megasporocyte nucleus; GO:0043078 polar nucleus; GO:0043226 organelle; GO:0043227 membrane-bounded organelle; GO:0043229 intracellular organelle; GO:0043231 intracellular …				K	KOG1510	RNA polymerase II holoenzyme and mediator subcomplex, subunit SURB7/SRB7
A0A2G3AL22	Hydrolase_4 domain-containing protein OS=Capsicum annuum OX=4072 GN=T459_02813 PE=4 SV=1	T459_02813	62.9	0.994	0.961	1.13	1.133	0.876	0.912													1.056	0.565878					cytoplasm									S	KOG1552	Predicted alpha/beta hydrolase
A0A2G2ZWY4	Mitogen-activated protein kinase OS=Capsicum annuum OX=4072 GN=T459_08580 PE=3 SV=1	T459_08580	38.4	1.164	1.067	1.126	0.905	0.874	0.855	0.935	1.034	0.999	1.013	1.02	1.005	0.994	0.976	1.048	0.97	1.015	1.004	1.274	0.00132418	0.977	0.463555	1.01	0.729951	cytoplasm	K14512	MPK6; mitogen-activated protein kinase 6 [EC:2.7.11.24]	map04016 MAPK signaling pathway - plant; map04075 Plant hormone signal transduction; map04626 Plant-pathogen interaction	GO:0000003 reproduction; GO:0000165 MAPK cascade; GO:0000302 response to reactive oxygen species; GO:0001101 response to acid chemical; GO:0002218 activation of innate immune response; GO:0002252 immune effector process; GO:0002253 activation of immune response; GO:0002376 immune system process; GO:0002682 regulation of immune system process; GO:0002684 positive regulation of immune system proces…	GO:0005622 intracellular; GO:0005623 cell; GO:0005634 nucleus; GO:0005737 cytoplasm; GO:0005794 Golgi apparatus; GO:0005802 trans-Golgi network; GO:0005856 cytoskeleton; GO:0009524 phragmoplast; GO:0009574 preprophase band; GO:0012505 endomembrane system; GO:0015630 microtubule cytoskeleton; GO:0031984 organelle subcompartment; GO:0043226 organelle; GO:0043227 membrane-bounded organelle; GO:00432…	GO:0003824 catalytic activity; GO:0004672 protein kinase activity; GO:0004674 protein serine/threonine kinase activity; GO:0004707 MAP kinase activity; GO:0016301 kinase activity; GO:0016740 transferase activity; GO:0016772 transferase activity, transferring phosphorus-containing groups; GO:0016773 phosphotransferase activity, alcohol group as acceptor; GO:0140096 catalytic activity, acting on a …	PF00069	Protein kinase domain	T	KOG0660	Mitogen-activated protein kinase
A0A2G3ADT7	LOW QUALITY PROTEIN: SWR1-complex protein 3-like(predicted) OS=Capsicum annuum OX=4072 GN=T459_00288 PE=4 SV=1	T459_00288	68.4	1.074	0.942	1.006	0.95	1.01	1	1.099	1.011	1.023	0.89	0.932	1.053	1.1	1.005	0.882	1.032	0.976	1.015	1.021	0.666675	1.09	0.195443	0.988	0.823265	nucleus							PF01426; PF07500	BAH domain; Transcription factor S-II (TFIIS), central domain	K	KOG1886	BAH domain proteins
A0A2G3APD9	protein QUIRKY(predicted) OS=Capsicum annuum OX=4072 GN=T459_03895 PE=4 SV=1	T459_03895	114.4	1.1	1.033	1.034	0.972	0.987	0.905	0.906	0.904	0.974	1.029	1.168	1.022	0.935	0.975	0.963	1.051	1.032	1.051	1.106	0.0408154	0.865	0.0447433	0.917	0.0032555	cytoplasm				GO:0001505 regulation of neurotransmitter levels; GO:0007154 cell communication; GO:0007165 signal transduction; GO:0009987 cellular process; GO:0010646 regulation of cell communication; GO:0019722 calcium-mediated signaling; GO:0019932 second-messenger-mediated signaling; GO:0023051 regulation of signaling; GO:0023052 signaling; GO:0030100 regulation of endocytosis; GO:0030334 regulation of cell…	GO:0005622 intracellular; GO:0005623 cell; GO:0005737 cytoplasm; GO:0005768 endosome; GO:0005783 endoplasmic reticulum; GO:0005789 endoplasmic reticulum membrane; GO:0008021 synaptic vesicle; GO:0012505 endomembrane system; GO:0012506 vesicle membrane; GO:0016020 membrane; GO:0016021 integral component of membrane; GO:0030133 transport vesicle; GO:0030658 transport vesicle membrane; GO:0030659 cy…	GO:0005488 binding; GO:0005509 calcium ion binding; GO:0043167 ion binding; GO:0043169 cation binding; GO:0046872 metal ion binding;	PF00168	C2 domain
A0A2G3AGT2	COP9 signalosome complex subunit 1 OS=Capsicum annuum OX=4072 GN=T459_01338 PE=4 SV=1	T459_01338	50.7	1.06	1.094	1.079	0.941	0.966	0.916	0.965	1.004	1.038	1.021	1.033	1.021	0.826	0.828	0.819	1.192	1.2	1.178	1.145	0.00160637	0.978	0.347585	0.693	5.33977e-07	nucleus	K12175	GPS1, COPS1, CSN1; COP9 signalosome complex subunit 1		GO:0000003 reproduction; GO:0000338 protein deneddylation; GO:0003006 developmental process involved in reproduction; GO:0006464 cellular protein modification process; GO:0006508 proteolysis; GO:0006807 nitrogen compound metabolic process; GO:0006950 response to stress; GO:0006970 response to osmotic stress; GO:0006972 hyperosmotic response; GO:0007275 multicellular organism development; GO:00081…	GO:0005622 intracellular; GO:0005623 cell; GO:0005634 nucleus; GO:0005737 cytoplasm; GO:0005829 cytosol; GO:0043226 organelle; GO:0043227 membrane-bounded organelle; GO:0043229 intracellular organelle; GO:0043231 intracellular membrane-bounded organelle;		PF01399	PCI domain	OT	KOG0686	COP9 signalosome, subunit CSN1
A0A2G3A392	MRP-S28 domain-containing protein OS=Capsicum annuum OX=4072 GN=T459_10767 PE=4 SV=1	T459_10767	50.3	0.904	0.915	0.866	1.068	1.143	1.088	0.903	0.946	1.042	1.012	1.075	1.024	0.881	0.922	0.912	1.096	1.088	1.105	0.814	0.00142921	0.929	0.179601	0.825	0.000184283	chloroplast	K17413	MRPS35; small subunit ribosomal protein S35							J	KOG3933	Mitochondrial ribosomal protein S28
A0A2G2YZ85	Sugar transporter ERD6-like 5 OS=Capsicum annuum OX=4072 GN=T459_22323 PE=3 SV=1	T459_22323	50.5	1.067	0.974	1.149	0.97	0.982	0.862	1.111	0.927	1.147	0.932	0.902	0.988	1.063	1.073	1.012	0.934	1.019	0.911	1.134	0.11996	1.129	0.17571	1.099	0.0684284	plasma membrane	K08145	SLC2A8, GLUT8; MFS transporter, SP family, solute carrier family 2 (facilitated glucose transporter), member 8							U	KOG0254	Predicted transporter (major facilitator superfamily)
A0A2G3A4L5	Myosin-2 OS=Capsicum annuum OX=4072 GN=T459_04271 PE=3 SV=1	T459_04271	95.1	1.148	1.092	1.153	0.795	0.896	0.92							0.909	0.935	0.93	1.074	1.062	1.095	1.3	0.00542935			0.859	0.000253917	nucleus				GO:0000278 mitotic cell cycle; GO:0000281 mitotic cytokinesis; GO:0000302 response to reactive oxygen species; GO:0000910 cytokinesis; GO:0006928 movement of cell or subcellular component; GO:0006935 chemotaxis; GO:0006950 response to stress; GO:0006970 response to osmotic stress; GO:0006971 hypotonic response; GO:0006979 response to oxidative stress; GO:0006996 organelle organization; GO:0007010…	GO:0001891 phagocytic cup; GO:0001931 uropod; GO:0005622 intracellular; GO:0005623 cell; GO:0005737 cytoplasm; GO:0005768 endosome; GO:0005783 endoplasmic reticulum; GO:0005826 actomyosin contractile ring; GO:0005829 cytosol; GO:0005856 cytoskeleton; GO:0005886 plasma membrane; GO:0005911 cell-cell junction; GO:0005938 cell cortex; GO:0009506 plasmodesma; GO:0009524 phragmoplast; GO:0012505 endom…	GO:0000146 microfilament motor activity; GO:0000166 nucleotide binding; GO:0003774 motor activity; GO:0003779 actin binding; GO:0003824 catalytic activity; GO:0005488 binding; GO:0005515 protein binding; GO:0005524 ATP binding; GO:0008092 cytoskeletal protein binding; GO:0008144 drug binding; GO:0016462 pyrophosphatase activity; GO:0016787 hydrolase activity; GO:0016817 hydrolase activity, acting…	PF00063	Myosin head (motor domain)	Z	KOG0160	Myosin class V heavy chain
A0A2G2ZDX8	Heat shock cognate 70 kDa protein OS=Capsicum annuum OX=4072 GN=T459_18252 PE=3 SV=1	T459_18252	70.9	0.981	0.968	0.988	1.026	1.018	1.023	0.98	0.968	0.944	1.03	1.029	1.044	0.942	0.924	0.937	1.097	1.069	1.038	0.958	0.00250178	0.932	0.00414041	0.875	0.00141307	cytoplasm	K03283	HSPA1s; heat shock 70kDa protein 1/2/6/8	map03040 Spliceosome; map04141 Protein processing in endoplasmic reticulum; map04144 Endocytosis						O	KOG0101	Molecular chaperones HSP70/HSC70, HSP70 superfamily
A0A2G2YT76	Trihelix transcription factor ASIL1 OS=Capsicum annuum OX=4072 GN=T459_23745 PE=4 SV=1	T459_23745	31	0.849	0.889	0.912	1.102	1.136	1.119													0.789	0.000477245					nucleus	K23490	CYB5; cytochrome b5					PF13837	Myb/SANT-like DNA-binding domain	C	KOG0537	Cytochrome b5
A0A2G2XWX1	Serine protease inhibitor 1 OS=Capsicum annuum OX=4072 GN=T459_34352 PE=4 SV=1	T459_34352	23.7	1.102	1.11	1.086	0.879	0.897	0.932	1.264	1.258	1.182	0.749	0.776	0.787	1.211	1.202	1.23	0.798	0.789	0.786	1.218	0.000421901	1.602	5.58085e-05	1.535	7.89439e-07	extracellular							PF00197	Trypsin and protease inhibitor
A0A2G2ZKM1	Putative haloacid dehalogenase-like hydrolase superfamily protein-like (Fragment)(predicted) OS=Capsicum annuum OX=4072 GN=T459_15544 PE=4 SV=1	T459_15544	30.2	1.002	1.014	1.027	1.008	0.986	0.997	0.911	0.906	0.975	1.042	1.189	0.98							1.017	0.14561	0.87	0.090495			chloroplast	K20860	FHY1; FMN hydrolase / 5-amino-6-(5-phospho-D-ribitylamino)uracil phosphatase [EC:3.1.3.102 3.1.3.104]	map00740 Riboflavin metabolism; map01100 Metabolic pathways; map01110 Biosynthesis of secondary metabolites	GO:0006793 phosphorus metabolic process; GO:0006796 phosphate-containing compound metabolic process; GO:0008152 metabolic process; GO:0009987 cellular process; GO:0016311 dephosphorylation; GO:0044237 cellular metabolic process;	GO:0005622 intracellular; GO:0005623 cell; GO:0005737 cytoplasm; GO:0009507 chloroplast; GO:0009536 plastid; GO:0043226 organelle; GO:0043227 membrane-bounded organelle; GO:0043229 intracellular organelle; GO:0043231 intracellular membrane-bounded organelle;	GO:0003824 catalytic activity; GO:0005488 binding; GO:0005515 protein binding; GO:0016787 hydrolase activity; GO:0016788 hydrolase activity, acting on ester bonds; GO:0016791 phosphatase activity; GO:0042578 phosphoric ester hydrolase activity; GO:0043621 protein self-association; GO:0090711 FMN hydrolase activity;			S	KOG3085	Predicted hydrolase (HAD superfamily)
A0A2G2XY38	Putative transcription factor PosF21 OS=Capsicum annuum OX=4072 GN=T459_33736 PE=4 SV=1	T459_33736	64.2	0.997	1.046	0.979	1.016	1.02	1	1.088	1.094	1.042	0.915	0.932	0.92	1.106	1.089	1.046	0.914	0.903	0.905	0.995	0.821393	1.165	0.000730509	1.191	0.000514764	nucleus				GO:0006355 regulation of transcription, DNA-templated; GO:0009889 regulation of biosynthetic process; GO:0010468 regulation of gene expression; GO:0010556 regulation of macromolecule biosynthetic process; GO:0019219 regulation of nucleobase-containing compound metabolic process; GO:0019222 regulation of metabolic process; GO:0031323 regulation of cellular metabolic process; GO:0031326 regulation …	GO:0005622 intracellular; GO:0005623 cell; GO:0005634 nucleus; GO:0005737 cytoplasm; GO:0005829 cytosol; GO:0043226 organelle; GO:0043227 membrane-bounded organelle; GO:0043229 intracellular organelle; GO:0043231 intracellular membrane-bounded organelle;	GO:0003700 DNA-binding transcription factor activity; GO:0140110 transcription regulator activity;
A0A1U8GH35	putative transferase At4g12130, mitochondrial(predicted) OS=Capsicum annuum OX=4072 GN=T459_00491 PE=4 SV=1	T459_00491	43.6	0.989	1.007	0.974	1.02	1.028	1.026	1.002	0.992	0.992	0.977	0.983	1.027	0.908	0.931	0.915	1.082	1.067	1.066	0.966	0.0253226	1	0.995434	0.857	6.21147e-05	chloroplast	K22073	IBA57; transferase CAF17, mitochondrial [EC:2.1.-.-]		GO:0006790 sulfur compound metabolic process; GO:0008152 metabolic process; GO:0009987 cellular process; GO:0016043 cellular component organization; GO:0016226 iron-sulfur cluster assembly; GO:0022607 cellular component assembly; GO:0031163 metallo-sulfur cluster assembly; GO:0044085 cellular component biogenesis; GO:0044237 cellular metabolic process; GO:0051186 cofactor metabolic process; GO:00…	GO:0005622 intracellular; GO:0005623 cell; GO:0005737 cytoplasm; GO:0005739 mitochondrion; GO:0005759 mitochondrial matrix; GO:0031974 membrane-enclosed lumen; GO:0043226 organelle; GO:0043227 membrane-bounded organelle; GO:0043229 intracellular organelle; GO:0043231 intracellular membrane-bounded organelle; GO:0043233 organelle lumen; GO:0070013 intracellular organelle lumen;				K	KOG2929	Transcription factor, component of CCR4 transcriptional complex
A0A1U8ECU6	formin-binding protein 4 isoform X1(predicted) OS=Capsicum annuum OX=4072 GN=T459_24644 PE=4 SV=1	T459_24644	98	0.91	1.004	0.935	1.014	1.081	1.062	1.138	0.897	1.013	1.021	0.869	1.071	0.781	0.99	0.957	1.099	1.256	0.922	0.902	0.0419826	1.029	0.777866	0.832	0.194677	nucleus					GO:0005622 intracellular; GO:0005623 cell; GO:0005634 nucleus; GO:0005654 nucleoplasm; GO:0016604 nuclear body; GO:0016607 nuclear speck; GO:0031974 membrane-enclosed lumen; GO:0031981 nuclear lumen; GO:0043226 organelle; GO:0043227 membrane-bounded organelle; GO:0043229 intracellular organelle; GO:0043231 intracellular membrane-bounded organelle; GO:0043233 organelle lumen; GO:0070013 intracellu…		PF00397	WW domain
A0A1U8G487	Fe2OG dioxygenase domain-containing protein OS=Capsicum annuum OX=4072 GN=T459_10489 PE=3 SV=1	T459_10489	35.1	0.916	1.134	0.924	1.157	0.846	1.03	1.02	1.058	1.016	0.929	0.987	0.998	1.145	1.401	1.238	0.774	0.723	0.736	0.981	0.893484	1.062	0.0792013	1.695	0.00108322	nucleus							PF03171	2OG-Fe(II) oxygenase superfamily	Q	KOG0143	Iron/ascorbate family oxidoreductases
A0A1U8FX36	Putative 2-oxoglutarate-dependent dioxygenase OS=Capsicum annuum OX=4072 GN=T459_05469 PE=3 SV=1	T459_05469	36.7	1.008	0.909	0.934	1.07	1.035	1.051	1.018	0.964	1.036	1.058	0.944	0.988	0.972	1.114	1.084	1.03	0.982	0.829	0.903	0.0340687	1.009	0.8139	1.116	0.223646	cytoplasm				GO:0006950 response to stress; GO:0007154 cell communication; GO:0009267 cellular response to starvation; GO:0009605 response to external stimulus; GO:0009987 cellular process; GO:0009991 response to extracellular stimulus; GO:0031667 response to nutrient levels; GO:0031668 cellular response to extracellular stimulus; GO:0031669 cellular response to nutrient levels; GO:0033554 cellular response t…			PF03171	2OG-Fe(II) oxygenase superfamily	Q	KOG0143	Iron/ascorbate family oxidoreductases
A0A2G2YD62	Peptidase A1 domain-containing protein OS=Capsicum annuum OX=4072 GN=T459_26988 PE=3 SV=1	T459_26988	44.1	1.002	1.074	0.996	0.955	0.996	0.984	0.963	0.956	1.06	0.975	1.022	1.029	1.023	1.072	1.066	0.914	1.003	0.932	1.047	0.172342	0.984	0.681637	1.11	0.0306195	chloroplast	K22683	APF2; aspartyl protease family protein [EC:3.4.23.-]							O	KOG1339	Aspartyl protease
A0A2G2YA01	Peroxidase OS=Capsicum annuum OX=4072 GN=T459_31002 PE=3 SV=1	T459_31002	34.9	0.953	0.928	0.955	1.083	1.062	0.979	0.984	0.992	1.011	0.956	1.008	1.018	1.148	1.232	1.075	0.818	0.851	0.94	0.908	0.0410843	1.002	0.929405	1.324	0.00791544	vacuolar membrane	K00430	E1.11.1.7; peroxidase [EC:1.11.1.7]	map00940 Phenylpropanoid biosynthesis; map01100 Metabolic pathways; map01110 Biosynthesis of secondary metabolites				PF00141	Peroxidase
A0A1U8GDL9	AA_TRNA_LIGASE_II domain-containing protein OS=Capsicum annuum OX=4072 GN=T459_12718 PE=4 SV=1	T459_12718	55.5	0.973	0.964	1.001	1.031	1.002	1.02	1.015	0.998	0.977	0.977	0.954	1.016	0.948	1.008	0.936	0.964	1.083	1.067	0.962	0.0521194	1.015	0.530187	0.929	0.165115	chloroplast	K01875	SARS, serS; seryl-tRNA synthetase [EC:6.1.1.11]	map00970 Aminoacyl-tRNA biosynthesis				PF02403; PF00587	Seryl-tRNA synthetase N-terminal domain; tRNA synthetase class II core domain (G, H, P, S and T)	J	KOG2509	Seryl-tRNA synthetase
A0A2G2XZ94	UDP-glucuronate 4-epimerase 6 OS=Capsicum annuum OX=4072 GN=T459_33376 PE=4 SV=1	T459_33376	49.2	0.958	1.068	1.024	0.918	1.08	0.957	1.002	1.009	0.97	1.047	1.011	0.975	1.132	1.136	1.057	0.915	0.91	0.918	1.032	0.599968	0.983	0.515561	1.212	0.00124465	cytoplasm	K08679	E5.1.3.6; UDP-glucuronate 4-epimerase [EC:5.1.3.6]	map00520 Amino sugar and nucleotide sugar metabolism; map01100 Metabolic pathways	GO:0005975 carbohydrate metabolic process; GO:0005996 monosaccharide metabolic process; GO:0006063 uronic acid metabolic process; GO:0006082 organic acid metabolic process; GO:0006950 response to stress; GO:0006952 defense response; GO:0008152 metabolic process; GO:0009058 biosynthetic process; GO:0009605 response to external stimulus; GO:0009607 response to biotic stimulus; GO:0009617 response t…	GO:0005622 intracellular; GO:0005623 cell; GO:0005737 cytoplasm; GO:0005768 endosome; GO:0005794 Golgi apparatus; GO:0005802 trans-Golgi network; GO:0012505 endomembrane system; GO:0031410 cytoplasmic vesicle; GO:0031982 vesicle; GO:0031984 organelle subcompartment; GO:0043226 organelle; GO:0043227 membrane-bounded organelle; GO:0043229 intracellular organelle; GO:0043231 intracellular membrane-b…				M	KOG1371	UDP-glucose 4-epimerase/UDP-sulfoquinovose synthase
A0A1U8H2P4	Methylsterol monooxygenase 2-1 OS=Capsicum annuum OX=4072 GN=T459_18281 PE=3 SV=1	T459_18281	31.3	1.163	1.149	1.069	0.802	0.921	0.902	1.08	0.952	1.005	1.009	0.967	0.995	0.908	0.914	0.896	1.045	1.165	1.077	1.288	0.00729332	1.022	0.618925	0.827	0.00455762	cytoplasm	K14424	SMO2; plant 4alpha-monomethylsterol monooxygenase [EC:1.14.18.11]	map00100 Steroid biosynthesis; map01100 Metabolic pathways; map01110 Biosynthesis of secondary metabolites	GO:0000003 reproduction; GO:0003006 developmental process involved in reproduction; GO:0006629 lipid metabolic process; GO:0006694 steroid biosynthetic process; GO:0007275 multicellular organism development; GO:0008152 metabolic process; GO:0008202 steroid metabolic process; GO:0008610 lipid biosynthetic process; GO:0009058 biosynthetic process; GO:0009790 embryo development; GO:0009791 post-embr…	GO:0005622 intracellular; GO:0005623 cell; GO:0005737 cytoplasm; GO:0005783 endoplasmic reticulum; GO:0005789 endoplasmic reticulum membrane; GO:0009507 chloroplast; GO:0009526 plastid envelope; GO:0009536 plastid; GO:0009941 chloroplast envelope; GO:0012505 endomembrane system; GO:0016020 membrane; GO:0031967 organelle envelope; GO:0031975 envelope; GO:0031984 organelle subcompartment; GO:004217…	GO:0000254 C-4 methylsterol oxidase activity; GO:0003824 catalytic activity; GO:0004497 monooxygenase activity; GO:0016491 oxidoreductase activity; GO:0016705 oxidoreductase activity, acting on paired donors, with incorporation or reduction of molecular oxygen; GO:0016709 oxidoreductase activity, acting on paired donors, with incorporation or reduction of molecular oxygen, NAD(P)H as one donor, a…			I	KOG0873	C-4 sterol methyl oxidase
A0A1U8EX47	YrdC-like domain-containing protein OS=Capsicum annuum OX=4072 GN=T459_28780 PE=4 SV=1	T459_28780	30.4	1.039	0.943	0.994	1.037	1.048	0.946	1.025	1.086	1.001	0.85	0.994	1.053	0.91	0.966	1.017	0.993	1.129	0.991	0.982	0.695718	1.074	0.334317	0.929	0.249207	chloroplast									J	KOG3051	RNA binding/translational regulation protein of the SUA5 family
A0A1U8FBQ6	bifunctional riboflavin kinase/FMN phosphatase-like(predicted) OS=Capsicum annuum OX=4072 GN=T459_20330 PE=4 SV=1	T459_20330	42	0.948	1.017	0.948	1.056	0.987	1.05							0.876	0.932	0.868	1.042	1.174	1.112	0.942	0.132788			0.804	0.00612564	cytoskeleton	K20884	FHY; riboflavin kinase / FMN hydrolase [EC:2.7.1.26 3.1.3.102]	map00740 Riboflavin metabolism; map01100 Metabolic pathways; map01110 Biosynthesis of secondary metabolites						S	KOG2914	Predicted haloacid-halidohydrolase and related hydrolases
A0A1U8GD38	Cryptochrome-1 OS=Capsicum annuum OX=4072 GN=T459_11927 PE=4 SV=1	T459_11927	76.9	1.247	1.096	1.19	0.754	0.844	0.872	0.996	0.892	1.171	0.935	0.969	1.039							1.43	0.00348208	1.039	0.714566			chloroplast	K12118	CRY1; cryptochrome 1	map04712 Circadian rhythm - plant	GO:0000302 response to reactive oxygen species; GO:0000304 response to singlet oxygen; GO:0001101 response to acid chemical; GO:0001558 regulation of cell growth; GO:0002682 regulation of immune system process; GO:0002684 positive regulation of immune system process; GO:0002831 regulation of response to biotic stimulus; GO:0002833 positive regulation of response to biotic stimulus; GO:0006139 nuc…	GO:0005622 intracellular; GO:0005623 cell; GO:0005634 nucleus; GO:0005654 nucleoplasm; GO:0005737 cytoplasm; GO:0016604 nuclear body; GO:0031974 membrane-enclosed lumen; GO:0031981 nuclear lumen; GO:0043226 organelle; GO:0043227 membrane-bounded organelle; GO:0043229 intracellular organelle; GO:0043231 intracellular membrane-bounded organelle; GO:0043233 organelle lumen; GO:0070013 intracellular …	GO:0000166 nucleotide binding; GO:0003824 catalytic activity; GO:0004672 protein kinase activity; GO:0005488 binding; GO:0005515 protein binding; GO:0005524 ATP binding; GO:0008144 drug binding; GO:0009881 photoreceptor activity; GO:0009882 blue light photoreceptor activity; GO:0016301 kinase activity; GO:0016740 transferase activity; GO:0016772 transferase activity, transferring phosphorus-conta…	PF00875; PF03441	DNA photolyase; FAD binding domain of DNA photolyase	LT	KOG0133	Deoxyribodipyrimidine photolyase/cryptochrome
A0A1U8FHQ2	Senescence domain-containing protein OS=Capsicum annuum OX=4072 GN=T459_04082 PE=4 SV=1	T459_04082	48.8	0.987	1.004	1.09	0.956	0.994	0.974													1.054	0.189901					chloroplast	K19366	SPG20; spartin	map04144 Endocytosis	GO:0001101 response to acid chemical; GO:0002239 response to oomycetes; GO:0006950 response to stress; GO:0006970 response to osmotic stress; GO:0007623 circadian rhythm; GO:0009266 response to temperature stimulus; GO:0009314 response to radiation; GO:0009409 response to cold; GO:0009414 response to water deprivation; GO:0009415 response to water; GO:0009416 response to light stimulus; GO:000960…	GO:0005623 cell; GO:0005886 plasma membrane; GO:0005911 cell-cell junction; GO:0009506 plasmodesma; GO:0016020 membrane; GO:0030054 cell junction; GO:0055044 symplast; GO:0071944 cell periphery;
A0A2G2YNA9	NB-ARC domain-containing protein OS=Capsicum annuum OX=4072 GN=T459_26326 PE=3 SV=1	T459_26326	78.3	1.11	1.046	1.084	0.842	0.918	1.004													1.172	0.0397797					nucleus							PF00931	NB-ARC domain	T	KOG4658	Apoptotic ATPase
A0A2G2Y8R7	Dihydroxy-acid dehydratase(predicted) OS=Capsicum annuum OX=4072 GN=T459_30555 PE=4 SV=1	T459_30555	8	0.892	0.964	0.886	1.118	1.058	1.092	1.04	0.977	0.964	1.042	0.983	1.002	0.958	1.007	1.093	1.041	0.959	0.95	0.839	0.0049986	0.985	0.619854	1.037	0.504062	cytoplasm	K01687	ilvD; dihydroxy-acid dehydratase [EC:4.2.1.9]	map00290 Valine, leucine and isoleucine biosynthesis; map00770 Pantothenate and CoA biosynthesis; map01100 Metabolic pathways; map01110 Biosynthesis of secondary metabolites; map01210 2-Oxocarboxylic acid metabolism; map01230 Biosynthesis of amino acids	GO:0006082 organic acid metabolic process; GO:0006520 cellular amino acid metabolic process; GO:0006807 nitrogen compound metabolic process; GO:0006950 response to stress; GO:0006970 response to osmotic stress; GO:0007275 multicellular organism development; GO:0008152 metabolic process; GO:0008652 cellular amino acid biosynthetic process; GO:0009058 biosynthetic process; GO:0009081 branched-chain…	GO:0005622 intracellular; GO:0005623 cell; GO:0005737 cytoplasm; GO:0009507 chloroplast; GO:0009532 plastid stroma; GO:0009536 plastid; GO:0009570 chloroplast stroma; GO:0043226 organelle; GO:0043227 membrane-bounded organelle; GO:0043229 intracellular organelle; GO:0043231 intracellular membrane-bounded organelle;	GO:0003824 catalytic activity; GO:0004160 dihydroxy-acid dehydratase activity; GO:0005488 binding; GO:0005507 copper ion binding; GO:0016829 lyase activity; GO:0016835 carbon-oxygen lyase activity; GO:0016836 hydro-lyase activity; GO:0043167 ion binding; GO:0043169 cation binding; GO:0046872 metal ion binding; GO:0046914 transition metal ion binding;			E	KOG2448	Dihydroxy-acid dehydratase
A0A2G3A397	Anamorsin-like protein (Fragment) OS=Capsicum annuum OX=4072 GN=T459_10802 PE=3 SV=1	T459_10802	27.8	0.943	0.872	0.983	1.068	1.038	1.114	0.921	0.982	0.975	1.012	0.985	1.076	0.928	0.959	0.928	1.076	1.106	1.011	0.869	0.0255218	0.937	0.11979	0.882	0.0120207	endoplasmic reticulum	K22746	CIAPIN1, DRE2; anamorsin		GO:0006790 sulfur compound metabolic process; GO:0008152 metabolic process; GO:0009987 cellular process; GO:0016043 cellular component organization; GO:0016226 iron-sulfur cluster assembly; GO:0022607 cellular component assembly; GO:0031163 metallo-sulfur cluster assembly; GO:0044085 cellular component biogenesis; GO:0044237 cellular metabolic process; GO:0051186 cofactor metabolic process; GO:00…	GO:0005622 intracellular; GO:0005623 cell; GO:0005737 cytoplasm;				S	KOG4020	Protein DRE2, required for cell viability
A0A1U8DYH7	DEAD-box ATP-dependent RNA helicase 24 OS=Capsicum annuum OX=4072 GN=T459_02456 PE=3 SV=1	T459_02456	84.3	1.026	1.013	1.016	0.992	0.962	0.998	0.989	0.995	0.961	1.019	0.928	1.124	1.009	0.974	0.98	1.01	1.01	1.056	1.035	0.0456923	0.959	0.527466	0.963	0.112562	cytoplasm	K12835	DDX42, SF3B125; ATP-dependent RNA helicase DDX42 [EC:3.6.4.13]	map03040 Spliceosome	GO:0006139 nucleobase-containing compound metabolic process; GO:0006725 cellular aromatic compound metabolic process; GO:0006807 nitrogen compound metabolic process; GO:0008152 metabolic process; GO:0009987 cellular process; GO:0010501 RNA secondary structure unwinding; GO:0016070 RNA metabolic process; GO:0034641 cellular nitrogen compound metabolic process; GO:0043170 macromolecule metabolic pr…	GO:0005622 intracellular; GO:0005623 cell; GO:0005634 nucleus; GO:0005730 nucleolus; GO:0005737 cytoplasm; GO:0031974 membrane-enclosed lumen; GO:0031981 nuclear lumen; GO:0043226 organelle; GO:0043227 membrane-bounded organelle; GO:0043228 non-membrane-bounded organelle; GO:0043229 intracellular organelle; GO:0043231 intracellular membrane-bounded organelle; GO:0043232 intracellular non-membrane…	GO:0003724 RNA helicase activity; GO:0003824 catalytic activity; GO:0004386 helicase activity; GO:0008186 RNA-dependent ATPase activity; GO:0016462 pyrophosphatase activity; GO:0016787 hydrolase activity; GO:0016817 hydrolase activity, acting on acid anhydrides; GO:0016818 hydrolase activity, acting on acid anhydrides, in phosphorus-containing anhydrides; GO:0016887 ATPase activity; GO:0017111 nu…	PF00270	DEAD/DEAH box helicase	A	KOG0339	ATP-dependent RNA helicase
A0A1U8DZ17	UDP-glucuronate 4-epimerase 1 OS=Capsicum annuum OX=4072 GN=T459_24485 PE=4 SV=1	T459_24485	48.2	1.075	1.041	1.056	0.982	0.915	0.952													1.113	0.00867702					cytoplasm	K08679	E5.1.3.6; UDP-glucuronate 4-epimerase [EC:5.1.3.6]	map00520 Amino sugar and nucleotide sugar metabolism; map01100 Metabolic pathways	GO:0005975 carbohydrate metabolic process; GO:0005996 monosaccharide metabolic process; GO:0006063 uronic acid metabolic process; GO:0006082 organic acid metabolic process; GO:0006950 response to stress; GO:0006952 defense response; GO:0008152 metabolic process; GO:0009058 biosynthetic process; GO:0009605 response to external stimulus; GO:0009607 response to biotic stimulus; GO:0009617 response t…	GO:0005622 intracellular; GO:0005623 cell; GO:0005737 cytoplasm; GO:0005768 endosome; GO:0005794 Golgi apparatus; GO:0005802 trans-Golgi network; GO:0012505 endomembrane system; GO:0031410 cytoplasmic vesicle; GO:0031982 vesicle; GO:0031984 organelle subcompartment; GO:0043226 organelle; GO:0043227 membrane-bounded organelle; GO:0043229 intracellular organelle; GO:0043231 intracellular membrane-b…	GO:0003824 catalytic activity; GO:0016853 isomerase activity; GO:0016854 racemase and epimerase activity; GO:0016857 racemase and epimerase activity, acting on carbohydrates and derivatives; GO:0050378 UDP-glucuronate 4-epimerase activity;			M	KOG1371	UDP-glucose 4-epimerase/UDP-sulfoquinovose synthase
A0A2G2YGK3	Putative ovule protein(predicted) OS=Capsicum annuum OX=4072 GN=T459_28344 PE=4 SV=1	T459_28344	149.3	1.067	1.034	1.142	0.888	0.877	1.053	1.098	0.974	1.248	1.007	0.69	0.992							1.151	0.0954949	1.235	0.197857			nucleus	K11671	NFRKB, INO80G; nuclear factor related to kappa-B-binding protein			GO:0000228 nuclear chromosome; GO:0000785 chromatin; GO:0000790 nuclear chromatin; GO:0005622 intracellular; GO:0005623 cell; GO:0005634 nucleus; GO:0005694 chromosome; GO:0031011 Ino80 complex; GO:0031974 membrane-enclosed lumen; GO:0031981 nuclear lumen; GO:0032991 protein-containing complex; GO:0033202 DNA helicase complex; GO:0043226 organelle; GO:0043227 membrane-bounded organelle; GO:004322…	GO:0002020 protease binding; GO:0005488 binding; GO:0005515 protein binding; GO:0019899 enzyme binding;			K	KOG1927	R-kappa-B and related transcription factors
A0A2G2YRG1	TYR_PHOSPHATASE_2 domain-containing protein OS=Capsicum annuum OX=4072 GN=T459_23115 PE=4 SV=1	T459_23115	79.7	1.082	1.103	1.082	0.907	0.924	0.865	1.06	0.896	0.917	1.051	1.008	1.074	0.932	0.894	0.983	1.071	1.065	1.061	1.212	0.0007397	0.917	0.185499	0.879	0.00920576	nucleus	K13917	RNGTT; mRNA-capping enzyme [EC:2.7.7.50 3.6.1.-]	map03015 mRNA surveillance pathway	GO:0006139 nucleobase-containing compound metabolic process; GO:0006370 7-methylguanosine mRNA capping; GO:0006396 RNA processing; GO:0006397 mRNA processing; GO:0006725 cellular aromatic compound metabolic process; GO:0006793 phosphorus metabolic process; GO:0006796 phosphate-containing compound metabolic process; GO:0006807 nitrogen compound metabolic process; GO:0008152 metabolic process; GO:0…	GO:0005622 intracellular; GO:0005623 cell; GO:0005634 nucleus; GO:0043226 organelle; GO:0043227 membrane-bounded organelle; GO:0043229 intracellular organelle; GO:0043231 intracellular membrane-bounded organelle;	GO:0003824 catalytic activity; GO:0004484 mRNA guanylyltransferase activity; GO:0004651 polynucleotide 5'-phosphatase activity; GO:0008192 RNA guanylyltransferase activity; GO:0016462 pyrophosphatase activity; GO:0016740 transferase activity; GO:0016772 transferase activity, transferring phosphorus-containing groups; GO:0016779 nucleotidyltransferase activity; GO:0016787 hydrolase activity; GO:00…	PF00782; PF01331; PF03919	Dual specificity phosphatase, catalytic domain; mRNA capping enzyme, catalytic domain; mRNA capping enzyme, C-terminal domain	A	KOG2386	mRNA capping enzyme, guanylyltransferase (alpha) subunit
A0A2G3AC58	Mitochondrial outer membrane protein porin 1 OS=Capsicum annuum OX=4072 GN=T459_06955 PE=4 SV=1	T459_06955	29.9	0.983	1.011	0.988	0.984	1.021	0.977	1.084	1.067	1.054	0.917	0.956	0.903	1.125	1.117	1.068	0.936	0.912	0.841	1	0.99479	1.155	0.001588	1.231	0.00446137	mitochondria	K15040	VDAC2; voltage-dependent anion channel protein 2		GO:0006091 generation of precursor metabolites and energy; GO:0006810 transport; GO:0006811 ion transport; GO:0006820 anion transport; GO:0006950 response to stress; GO:0006952 defense response; GO:0008152 metabolic process; GO:0009060 aerobic respiration; GO:0009266 response to temperature stimulus; GO:0009409 response to cold; GO:0009605 response to external stimulus; GO:0009607 response to bio…	GO:0005618 cell wall; GO:0005622 intracellular; GO:0005623 cell; GO:0005634 nucleus; GO:0005730 nucleolus; GO:0005737 cytoplasm; GO:0005739 mitochondrion; GO:0005740 mitochondrial envelope; GO:0005741 mitochondrial outer membrane; GO:0005773 vacuole; GO:0005774 vacuolar membrane; GO:0005886 plasma membrane; GO:0009507 chloroplast; GO:0009526 plastid envelope; GO:0009527 plastid outer membrane; GO…	GO:0005215 transporter activity; GO:0005216 ion channel activity; GO:0005244 voltage-gated ion channel activity; GO:0005253 anion channel activity; GO:0008308 voltage-gated anion channel activity; GO:0008509 anion transmembrane transporter activity; GO:0015075 ion transmembrane transporter activity; GO:0015103 inorganic anion transmembrane transporter activity; GO:0015267 channel activity; GO:001…			P	KOG3126	Porin/voltage-dependent anion-selective channel protein
A0A2G2Y3C5	Fatty acid amide hydrolase OS=Capsicum annuum OX=4072 GN=T459_31912 PE=4 SV=1	T459_31912	66.8	1.006	0.924	1	1.002	1.026	1.049	0.973	0.97	0.988	1.005	1.042	0.986	1.019	0.931	0.976	1.003	1.016	1.044	0.952	0.178965	0.966	0.118901	0.955	0.18116	cytoplasm				GO:0006066 alcohol metabolic process; GO:0006576 cellular biogenic amine metabolic process; GO:0006807 nitrogen compound metabolic process; GO:0006950 response to stress; GO:0006952 defense response; GO:0008152 metabolic process; GO:0009308 amine metabolic process; GO:0009605 response to external stimulus; GO:0009607 response to biotic stimulus; GO:0009617 response to bacterium; GO:0009987 cellul…	GO:0005622 intracellular; GO:0005623 cell; GO:0005737 cytoplasm; GO:0005773 vacuole; GO:0005774 vacuolar membrane; GO:0005783 endoplasmic reticulum; GO:0005794 Golgi apparatus; GO:0005886 plasma membrane; GO:0012505 endomembrane system; GO:0016020 membrane; GO:0031090 organelle membrane; GO:0043226 organelle; GO:0043227 membrane-bounded organelle; GO:0043229 intracellular organelle; GO:0043231 in…	GO:0003824 catalytic activity; GO:0016787 hydrolase activity; GO:0016810 hydrolase activity, acting on carbon-nitrogen (but not peptide) bonds; GO:0016811 hydrolase activity, acting on carbon-nitrogen (but not peptide) bonds, in linear amides; GO:0047412 N-(long-chain-acyl)ethanolamine deacylase activity;			J	KOG1211	Amidases
A0A2G3AC26	Putative LRR receptor-like serine/threonine-protein kinase OS=Capsicum annuum OX=4072 GN=T459_06922 PE=4 SV=1	T459_06922	66.5	0.958	0.934	0.971	1.099	1.004	1.038	0.995	1.009	1.051	1.033	0.972	0.974	0.856	0.647	0.735	1.361	1.303	1.1	0.911	0.032792	1.026	0.382695	0.595	0.00731061	plasma membrane				GO:0002831 regulation of response to biotic stimulus; GO:0002832 negative regulation of response to biotic stimulus; GO:0031347 regulation of defense response; GO:0031348 negative regulation of defense response; GO:0032101 regulation of response to external stimulus; GO:0032102 negative regulation of response to external stimulus; GO:0043900 regulation of multi-organism process; GO:0043901 negati…	GO:0005622 intracellular; GO:0005623 cell; GO:0005634 nucleus; GO:0005737 cytoplasm; GO:0005886 plasma membrane; GO:0009507 chloroplast; GO:0009536 plastid; GO:0016020 membrane; GO:0043226 organelle; GO:0043227 membrane-bounded organelle; GO:0043229 intracellular organelle; GO:0043231 intracellular membrane-bounded organelle; GO:0071944 cell periphery;		PF07714	Protein tyrosine kinase
A0A1U8FJI2	60S acidic ribosomal protein P0 OS=Capsicum annuum OX=4072 GN=T459_05044 PE=3 SV=1	T459_05044	34.1	0.999	0.929	0.928	1.07	1.056	1.028	1.098	1.075	1.038	0.966	0.929	0.882	1.144	1.135	1.09	0.87	0.904	0.87	0.906	0.0211987	1.156	0.00935202	1.274	0.000250511	cytoplasm	K02941	RP-LP0, RPLP0; large subunit ribosomal protein LP0	map03010 Ribosome	GO:0006950 response to stress; GO:0009628 response to abiotic stimulus; GO:0034059 response to anoxia; GO:0036293 response to decreased oxygen levels; GO:0050896 response to stimulus; GO:0070482 response to oxygen levels;	GO:0005622 intracellular; GO:0005623 cell; GO:0005737 cytoplasm; GO:0005829 cytosol; GO:0005840 ribosome; GO:0015934 large ribosomal subunit; GO:0022625 cytosolic large ribosomal subunit; GO:0022626 cytosolic ribosome; GO:0032991 protein-containing complex; GO:0043226 organelle; GO:0043228 non-membrane-bounded organelle; GO:0043229 intracellular organelle; GO:0043232 intracellular non-membrane-bo…	GO:0003735 structural constituent of ribosome; GO:0005198 structural molecule activity; GO:0005488 binding; GO:0044877 protein-containing complex binding;			J	KOG0815	60S acidic ribosomal protein P0
A0A2G2YQ27	Phenylalanine ammonia-lyase OS=Capsicum annuum OX=4072 GN=T459_22642 PE=3 SV=1	T459_22642	78.3	0.998	0.993	1.007	0.995	1.011	0.993													1	0.965972					chloroplast	K10775	PAL; phenylalanine ammonia-lyase [EC:4.3.1.24]	map00360 Phenylalanine metabolism; map00940 Phenylpropanoid biosynthesis; map01100 Metabolic pathways; map01110 Biosynthesis of secondary metabolites	GO:0001101 response to acid chemical; GO:0006464 cellular protein modification process; GO:0006508 proteolysis; GO:0006511 ubiquitin-dependent protein catabolic process; GO:0006725 cellular aromatic compound metabolic process; GO:0006807 nitrogen compound metabolic process; GO:0008152 metabolic process; GO:0009056 catabolic process; GO:0009057 macromolecule catabolic process; GO:0009058 biosynthe…		GO:0003824 catalytic activity; GO:0016829 lyase activity; GO:0016840 carbon-nitrogen lyase activity; GO:0016841 ammonia-lyase activity; GO:0045548 phenylalanine ammonia-lyase activity;			Q	KOG0222	Phenylalanine and histidine ammonia-lyase
A0A2G3A2W4	Glycine--tRNA ligase OS=Capsicum annuum OX=4072 GN=T459_10669 PE=4 SV=1	T459_10669	70.3	1.008	1.035	1.042	0.95	0.976	0.945	0.945	0.922	0.918	1.064	1.074	1.061	0.954	0.984	0.995	1.029	1.038	1.014	1.075	0.00721593	0.871	0.000141802	0.952	0.0261665	cytoplasm	K01880	GARS, glyS1; glycyl-tRNA synthetase [EC:6.1.1.14]	map00970 Aminoacyl-tRNA biosynthesis				PF00587; PF03129	tRNA synthetase class II core domain (G, H, P, S and T); Anticodon binding domain	J	KOG2298	Glycyl-tRNA synthetase and related class II tRNA synthetase
A0A1U8F558	Putative ovule protein(predicted) OS=Capsicum annuum OX=4072 GN=T459_27916 PE=4 SV=1	T459_27916	43.7	0.953	1.001	0.924	1.031	0.999	1.109													0.917	0.0895565					cytoplasm
A0A2G2ZRB1	Squalene epoxidase 3 OS=Capsicum annuum OX=4072 GN=T459_12934 PE=4 SV=1	T459_12934	58.1	0.926	0.95	1.022	1.025	0.967	1.007	1.018	1.015	0.904	1.039	1.012	1.01	1.055	0.964	1.083	0.923	0.982	1	0.966	0.366111	0.959	0.346775	1.068	0.203575	chloroplast	K00511	SQLE, ERG1; squalene monooxygenase [EC:1.14.14.17]	map00100 Steroid biosynthesis; map00909 Sesquiterpenoid and triterpenoid biosynthesis; map01100 Metabolic pathways; map01110 Biosynthesis of secondary metabolites						I	KOG1298	Squalene monooxygenase
A0A1U8FIW0	Oxalate--CoA ligase OS=Capsicum annuum OX=4072 GN=T459_09338 PE=4 SV=1	T459_09338	56.3	0.776	0.792	0.813	1.231	1.208	1.187	0.788	0.888	0.847	1.048	1.059	1.179	0.953	1.038	0.95	1.04	1.044	0.997	0.657	1.61748e-05	0.768	0.00672639	0.955	0.2212	cytoplasm	K22133	AAE3; oxalate---CoA ligase [EC:6.2.1.8]	map00630 Glyoxylate and dicarboxylate metabolism; map01100 Metabolic pathways	GO:0000003 reproduction; GO:0003006 developmental process involved in reproduction; GO:0006082 organic acid metabolic process; GO:0006950 response to stress; GO:0006952 defense response; GO:0007275 multicellular organism development; GO:0008152 metabolic process; GO:0009056 catabolic process; GO:0009605 response to external stimulus; GO:0009607 response to biotic stimulus; GO:0009620 response to …	GO:0005576 extracellular region; GO:0005622 intracellular; GO:0005623 cell; GO:0005737 cytoplasm; GO:0005911 cell-cell junction; GO:0009506 plasmodesma; GO:0009507 chloroplast; GO:0009532 plastid stroma; GO:0009536 plastid; GO:0009570 chloroplast stroma; GO:0030054 cell junction; GO:0043226 organelle; GO:0043227 membrane-bounded organelle; GO:0043229 intracellular organelle; GO:0043231 intracellu…	GO:0003824 catalytic activity; GO:0016405 CoA-ligase activity; GO:0016874 ligase activity; GO:0016877 ligase activity, forming carbon-sulfur bonds; GO:0016878 acid-thiol ligase activity; GO:0050203 oxalate-CoA ligase activity;	PF13193	Domain of unknown function (DUF4009)	I	KOG1176	Acyl-CoA synthetase
A0A2G2YUD0	Mediator of RNA polymerase II transcription subunit 17 OS=Capsicum annuum OX=4072 GN=MED17 PE=3 SV=1	MED17	74	1.042	1.051	1.096	0.868	0.939	0.893	1.017	1.082	0.949	0.918	1.049	0.993	0.977	0.692	0.755	1.175	1.192	1.213	1.181	0.00387951	1.03	0.616595	0.677	0.0182128	nucleus	K15133	MED17; mediator of RNA polymerase II transcription subunit 17		GO:0006139 nucleobase-containing compound metabolic process; GO:0006396 RNA processing; GO:0006725 cellular aromatic compound metabolic process; GO:0006807 nitrogen compound metabolic process; GO:0008152 metabolic process; GO:0009892 negative regulation of metabolic process; GO:0009987 cellular process; GO:0010033 response to organic substance; GO:0010467 gene expression; GO:0010468 regulation of…	GO:0005622 intracellular; GO:0005623 cell; GO:0005634 nucleus; GO:0005654 nucleoplasm; GO:0016592 mediator complex; GO:0031974 membrane-enclosed lumen; GO:0031981 nuclear lumen; GO:0032991 protein-containing complex; GO:0043226 organelle; GO:0043227 membrane-bounded organelle; GO:0043229 intracellular organelle; GO:0043231 intracellular membrane-bounded organelle; GO:0043233 organelle lumen; GO:0…
A0A2G3A2L5	Plasma membrane ATPase OS=Capsicum annuum OX=4072 GN=T459_10564 PE=3 SV=1	T459_10564	106.1	1.07	1.07	1.054	0.878	1	0.934	1.019	0.948	0.954	1.02	1.041	1.024	0.855	0.947	1.072	1.002	1.032	1.029	1.136	0.0273594	0.947	0.0825614	0.938	0.362199	plasma membrane	K01535	PMA1, PMA2; H+-transporting ATPase [EC:7.1.2.1]	map00190 Oxidative phosphorylation; map01100 Metabolic pathways	GO:0006810 transport; GO:0006811 ion transport; GO:0006812 cation transport; GO:0015672 monovalent inorganic cation transport; GO:0034220 ion transmembrane transport; GO:0051179 localization; GO:0051234 establishment of localization; GO:0055085 transmembrane transport; GO:0098655 cation transmembrane transport; GO:0098660 inorganic ion transmembrane transport; GO:0098662 inorganic cation transmem…	GO:0005622 intracellular; GO:0005623 cell; GO:0005737 cytoplasm; GO:0005773 vacuole; GO:0005774 vacuolar membrane; GO:0005886 plasma membrane; GO:0016020 membrane; GO:0031090 organelle membrane; GO:0043226 organelle; GO:0043227 membrane-bounded organelle; GO:0043229 intracellular organelle; GO:0043231 intracellular membrane-bounded organelle; GO:0071944 cell periphery; GO:0098588 bounding membran…	GO:0003824 catalytic activity; GO:0005215 transporter activity; GO:0008324 cation transmembrane transporter activity; GO:0008553 proton-exporting ATPase activity, phosphorylative mechanism; GO:0015075 ion transmembrane transporter activity; GO:0015077 monovalent inorganic cation transmembrane transporter activity; GO:0015078 proton transmembrane transporter activity; GO:0015318 inorganic molecula…	PF00690; PF00702	Cation transporter/ATPase, N-terminus; haloacid dehalogenase-like hydrolase	P	KOG0205	Plasma membrane H+-transporting ATPase
A0A2G3APD4	exosome complex exonuclease RRP42(predicted) OS=Capsicum annuum OX=4072 GN=T459_03977 PE=4 SV=1	T459_03977	30.6	1.1	1.12	1.065	0.905	0.912	0.903	1.136	0.972	1.056	0.958	0.964	0.925	1.113	1.036	1.003	0.897	1.015	0.946	1.208	0.00023268	1.111	0.091183	1.103	0.105761	cytoplasm	K12589	RRP42, EXOSC7; exosome complex component RRP42	map03018 RNA degradation	GO:0000288 nuclear-transcribed mRNA catabolic process, deadenylation-dependent decay; GO:0000291 nuclear-transcribed mRNA catabolic process, exonucleolytic; GO:0000459 exonucleolytic trimming involved in rRNA processing; GO:0000460 maturation of 5.8S rRNA; GO:0000466 maturation of 5.8S rRNA from tricistronic rRNA transcript (SSU-rRNA, 5.8S rRNA, LSU-rRNA); GO:0000467 exonucleolytic trimming to ge…	GO:0000176 nuclear exosome (RNase complex); GO:0000177 cytoplasmic exosome (RNase complex); GO:0000178 exosome (RNase complex); GO:0005622 intracellular; GO:0005623 cell; GO:0005634 nucleus; GO:0005654 nucleoplasm; GO:0005737 cytoplasm; GO:0005829 cytosol; GO:0031974 membrane-enclosed lumen; GO:0031981 nuclear lumen; GO:0032991 protein-containing complex; GO:0043226 organelle; GO:0043227 membrane…	GO:0000175 3'-5'-exoribonuclease activity; GO:0003676 nucleic acid binding; GO:0003723 RNA binding; GO:0003824 catalytic activity; GO:0004518 nuclease activity; GO:0004527 exonuclease activity; GO:0004532 exoribonuclease activity; GO:0004540 ribonuclease activity; GO:0005488 binding; GO:0008408 3'-5' exonuclease activity; GO:0016787 hydrolase activity; GO:0016788 hydrolase activity, acting on est…	PF01138; PF03725	3' exoribonuclease family, domain 1; 3' exoribonuclease family, domain 2	J	KOG1612	Exosomal 3'-5' exoribonuclease complex, subunit Rrp42
A0A1U8HDD5	Putative ovule protein(predicted) OS=Capsicum annuum OX=4072 GN=T459_17556 PE=4 SV=1	T459_17556	64.4	1.01	1.002	0.97	1.038	0.992	0.994	1.051	1.034	0.989	0.944	0.978	1.011							0.986	0.510091	1.048	0.155077			nucleus
A0A1U8H2Z7	Thylakoid lumenal 15 kDa protein 1, chloroplastic OS=Capsicum annuum OX=4072 GN=T459_18287 PE=4 SV=1	T459_18287	22.7	1.019	0.992	1.014	1.001	0.992	1.004	1.012	1.075	1.049	0.947	0.894	0.936	1.082	1.214	0.976	1.031	0.831	0.933	1.009	0.362928	1.129	0.00806458	1.171	0.150264	chloroplast					GO:0005622 intracellular; GO:0005623 cell; GO:0005737 cytoplasm; GO:0009507 chloroplast; GO:0009534 chloroplast thylakoid; GO:0009535 chloroplast thylakoid membrane; GO:0009536 plastid; GO:0009543 chloroplast thylakoid lumen; GO:0009579 thylakoid; GO:0016020 membrane; GO:0031976 plastid thylakoid; GO:0031977 thylakoid lumen; GO:0031978 plastid thylakoid lumen; GO:0031984 organelle subcompartment;…
A0A2G2YN83	NB-ARC domain-containing protein OS=Capsicum annuum OX=4072 GN=T459_26327 PE=3 SV=1	T459_26327	87.5	1.07	1.05	1.073	0.842	0.917	0.938	0.905	0.916	0.931	1.107	1.055	1.106							1.184	0.00718296	0.842	0.000658243			cytoplasm							PF00931	NB-ARC domain	T	KOG4658	Apoptotic ATPase
A0A2G3AJ03	Calmodulin-binding transcription activator 5 OS=Capsicum annuum OX=4072 GN=T459_02103 PE=4 SV=1	T459_02103	104.4	0.973	0.919	1.028	0.972	1.127	0.989	1.052	1.06	0.976	1.016	0.956	0.912	1.004	1.076	1.004	1.007	1.032	1.029	0.946	0.389588	1.071	0.168472	1.005	0.855604	nucleus	K21596	CAMTA; calmodulin-binding transcription activator		GO:0006139 nucleobase-containing compound metabolic process; GO:0006351 transcription, DNA-templated; GO:0006355 regulation of transcription, DNA-templated; GO:0006357 regulation of transcription by RNA polymerase II; GO:0006366 transcription by RNA polymerase II; GO:0006725 cellular aromatic compound metabolic process; GO:0006807 nitrogen compound metabolic process; GO:0006950 response to stress…	GO:0005622 intracellular; GO:0005623 cell; GO:0005634 nucleus; GO:0043226 organelle; GO:0043227 membrane-bounded organelle; GO:0043229 intracellular organelle; GO:0043231 intracellular membrane-bounded organelle;	GO:0000981 DNA-binding transcription factor activity, RNA polymerase II-specific; GO:0001228 DNA-binding transcription activator activity, RNA polymerase II-specific; GO:0003676 nucleic acid binding; GO:0003677 DNA binding; GO:0003700 DNA-binding transcription factor activity; GO:0005488 binding; GO:0005515 protein binding; GO:0005516 calmodulin binding; GO:0043565 sequence-specific DNA binding; …	PF03859	CG-1 domain	S	KOG0520	Uncharacterized conserved protein, contains IPT/TIG domain
A0A1U8H0S9	Glyoxylate/hydroxypyruvate reductase HPR3 OS=Capsicum annuum OX=4072 GN=T459_01306 PE=3 SV=1	T459_01306	35.4	1.001	1.017	1.054	0.952	0.996	0.984	0.978	1.054	0.948	0.975	1.034	1.018	1.049	0.985	1.018	1.07	0.8	1.088	1.048	0.0841473	0.984	0.67373	1.032	0.70973	chloroplast	K15919	HPR2_3; glyoxylate/hydroxypyruvate reductase [EC:1.1.1.79 1.1.1.81]	map00260 Glycine, serine and threonine metabolism; map00630 Glyoxylate and dicarboxylate metabolism; map01100 Metabolic pathways; map01110 Biosynthesis of secondary metabolites; map01200 Carbon metabolism				PF00389; PF02826	D-isomer specific 2-hydroxyacid dehydrogenase, catalytic domain; D-isomer specific 2-hydroxyacid dehydrogenase, NAD binding domain	C	KOG0069	Glyoxylate/hydroxypyruvate reductase (D-isomer-specific 2-hydroxy acid dehydrogenase superfamily)
A0A1U8F617	PTI1-like tyrosine-protein kinase 3 OS=Capsicum annuum OX=4072 GN=T459_31445 PE=3 SV=1	T459_31445	44.7	0.995	0.988	0.998	1.014	1.015	1.009	1.006	0.982	1.012	1.003	1.01	1.002	1.029	0.975	0.994	0.976	1.007	1.042	0.981	0.00566012	0.995	0.623366	0.991	0.737111	cytoplasm	K13436	PTI1; pto-interacting protein 1 [EC:2.7.11.1]	map04626 Plant-pathogen interaction	GO:0006464 cellular protein modification process; GO:0006468 protein phosphorylation; GO:0006793 phosphorus metabolic process; GO:0006796 phosphate-containing compound metabolic process; GO:0006807 nitrogen compound metabolic process; GO:0007154 cell communication; GO:0007165 signal transduction; GO:0007166 cell surface receptor signaling pathway; GO:0007167 enzyme linked receptor protein signali…	GO:0005623 cell; GO:0005886 plasma membrane; GO:0005911 cell-cell junction; GO:0009506 plasmodesma; GO:0016020 membrane; GO:0030054 cell junction; GO:0055044 symplast; GO:0071944 cell periphery;	GO:0003824 catalytic activity; GO:0004672 protein kinase activity; GO:0004674 protein serine/threonine kinase activity; GO:0004675 transmembrane receptor protein serine/threonine kinase activity; GO:0004888 transmembrane signaling receptor activity; GO:0005488 binding; GO:0005515 protein binding; GO:0016301 kinase activity; GO:0016740 transferase activity; GO:0016772 transferase activity, transfe…	PF07714	Protein tyrosine kinase	T	KOG1187	Serine/threonine protein kinase
A0A1U8GUL7	hepatoma-derived growth factor-related protein 2(predicted) OS=Capsicum annuum OX=4072 GN=T459_17137 PE=4 SV=1	T459_17137	98	1.052	1.048	1.045	0.959	0.971	0.945	1.042	1.013	1.023	0.969	1.013	0.942	1.023	1.043	0.988	1.02	0.999	0.92	1.094	0.000372433	1.053	0.0850743	1.039	0.329565	nucleus									D	KOG1525	Sister chromatid cohesion complex Cohesin, subunit PDS5
A0A2G2Z720	Protein FLUORESCENT IN BLUE LIGHT, chloroplastic OS=Capsicum annuum OX=4072 GN=T459_15821 PE=4 SV=1	T459_15821	32.7	0.83	0.943	0.96	1.085	1.19	0.998	0.912	1.024	0.998	1.189	0.9	0.984	1.038	1.052	1.115	0.985	0.917	0.902	0.835	0.0583231	0.955	0.672371	1.143	0.0183622	chloroplast					GO:0005622 intracellular; GO:0005623 cell; GO:0005737 cytoplasm; GO:0009507 chloroplast; GO:0009534 chloroplast thylakoid; GO:0009535 chloroplast thylakoid membrane; GO:0009536 plastid; GO:0009579 thylakoid; GO:0016020 membrane; GO:0031976 plastid thylakoid; GO:0031984 organelle subcompartment; GO:0034357 photosynthetic membrane; GO:0042651 thylakoid membrane; GO:0043226 organelle; GO:0043227 mem…
A0A2G2ZVR7	3-oxoacyl-[acyl-carrier-protein] synthase OS=Capsicum annuum OX=4072 GN=T459_08180 PE=3 SV=1	T459_08180	46.4	0.946	0.96	0.959	1.066	1.019	1.09													0.902	0.00735666					chloroplast	K09458	fabF, OXSM, CEM1; 3-oxoacyl-[acyl-carrier-protein] synthase II [EC:2.3.1.179]	map00061 Fatty acid biosynthesis; map00780 Biotin metabolism; map01100 Metabolic pathways; map01212 Fatty acid metabolism	GO:0000003 reproduction; GO:0003006 developmental process involved in reproduction; GO:0006082 organic acid metabolic process; GO:0006629 lipid metabolic process; GO:0006631 fatty acid metabolic process; GO:0006633 fatty acid biosynthetic process; GO:0006636 unsaturated fatty acid biosynthetic process; GO:0006950 response to stress; GO:0007275 multicellular organism development; GO:0008152 metabo…	GO:0005622 intracellular; GO:0005623 cell; GO:0005737 cytoplasm; GO:0009507 chloroplast; GO:0009532 plastid stroma; GO:0009536 plastid; GO:0009570 chloroplast stroma; GO:0043226 organelle; GO:0043227 membrane-bounded organelle; GO:0043229 intracellular organelle; GO:0043231 intracellular membrane-bounded organelle;	GO:0003824 catalytic activity; GO:0004312 fatty acid synthase activity; GO:0004315 3-oxoacyl-[acyl-carrier-protein] synthase activity; GO:0016740 transferase activity; GO:0016746 transferase activity, transferring acyl groups; GO:0016747 transferase activity, transferring acyl groups other than amino-acyl groups;	PF00109; PF02801	Beta-ketoacyl synthase, N-terminal domain; Beta-ketoacyl synthase, C-terminal domain	IQ	KOG1394	3-oxoacyl-(acyl-carrier-protein) synthase (I and II)
A0A2G2Y1R4	Superkiller viralicidic activity 2-like 2 OS=Capsicum annuum OX=4072 GN=T459_32500 PE=4 SV=1	T459_32500	113	1.143	1.046	1.128	0.831	0.903	0.902	0.966	0.978	1.01	1	0.967	1.084	1.068	0.9	1.16	0.933	0.955	0.992	1.258	0.00414485	0.968	0.437943	1.086	0.370634	nucleus	K12598	MTR4, SKIV2L2; ATP-dependent RNA helicase DOB1 [EC:3.6.4.13]	map03018 RNA degradation	GO:0000460 maturation of 5.8S rRNA; GO:0006139 nucleobase-containing compound metabolic process; GO:0006364 rRNA processing; GO:0006396 RNA processing; GO:0006401 RNA catabolic process; GO:0006725 cellular aromatic compound metabolic process; GO:0006807 nitrogen compound metabolic process; GO:0008152 metabolic process; GO:0009056 catabolic process; GO:0009057 macromolecule catabolic process; GO:0…	GO:0005622 intracellular; GO:0005623 cell; GO:0005634 nucleus; GO:0005654 nucleoplasm; GO:0031974 membrane-enclosed lumen; GO:0031981 nuclear lumen; GO:0043226 organelle; GO:0043227 membrane-bounded organelle; GO:0043229 intracellular organelle; GO:0043231 intracellular membrane-bounded organelle; GO:0043233 organelle lumen; GO:0070013 intracellular organelle lumen;	GO:0003724 RNA helicase activity; GO:0003824 catalytic activity; GO:0004386 helicase activity; GO:0008186 RNA-dependent ATPase activity; GO:0016462 pyrophosphatase activity; GO:0016787 hydrolase activity; GO:0016817 hydrolase activity, acting on acid anhydrides; GO:0016818 hydrolase activity, acting on acid anhydrides, in phosphorus-containing anhydrides; GO:0016887 ATPase activity; GO:0017111 nu…	PF00270; PF13234; PF08148	DEAD/DEAH box helicase; rRNA-processing arch domain; DSHCT (NUC185) domain	A	KOG0948	Nuclear exosomal RNA helicase MTR4, DEAD-box superfamily
A0A2G2ZAW0	Alpha-(1,4)-fucosyltransferase OS=Capsicum annuum OX=4072 GN=T459_17199 PE=3 SV=1	T459_17199	47.7	0.955	0.999	0.998	0.953	0.999	0.994	1.06	1.063	0.962	0.917	0.915	0.999	1.019	1.239	1.22	0.834	0.75	0.95	1.002	0.927616	1.09	0.121661	1.373	0.0267384	chloroplast	K14412	FUT13, FucTC; alpha-1,4-fucosyltransferase [EC:2.4.1.65]	map00513 Various types of N-glycan biosynthesis; map01100 Metabolic pathways	GO:0000271 polysaccharide biosynthetic process; GO:0005975 carbohydrate metabolic process; GO:0005976 polysaccharide metabolic process; GO:0008152 metabolic process; GO:0009058 biosynthetic process; GO:0009059 macromolecule biosynthetic process; GO:0009987 cellular process; GO:0010493 Lewis a epitope biosynthetic process; GO:0016051 carbohydrate biosynthetic process; GO:0033692 cellular polysacch…	GO:0000139 Golgi membrane; GO:0005622 intracellular; GO:0005623 cell; GO:0005737 cytoplasm; GO:0005794 Golgi apparatus; GO:0012505 endomembrane system; GO:0016020 membrane; GO:0031090 organelle membrane; GO:0031984 organelle subcompartment; GO:0043226 organelle; GO:0043227 membrane-bounded organelle; GO:0043229 intracellular organelle; GO:0043231 intracellular membrane-bounded organelle; GO:00985…	GO:0003824 catalytic activity; GO:0008417 fucosyltransferase activity; GO:0016740 transferase activity; GO:0016757 transferase activity, transferring glycosyl groups; GO:0016758 transferase activity, transferring hexosyl groups; GO:0046920 alpha-(1->3)-fucosyltransferase activity;			G	KOG2619	Fucosyltransferase
A0A2G3ADB3	3-oxoacyl-[acyl-carrier-protein] synthase OS=Capsicum annuum OX=4072 GN=T459_00103 PE=3 SV=1	T459_00103	43	0.96	0.928	0.952	1.018	0.984	1.164	1.274	1.041	1.102	0.789	0.867	0.94							0.897	0.112304	1.316	0.0252912			cytoplasm	K09458	fabF, OXSM, CEM1; 3-oxoacyl-[acyl-carrier-protein] synthase II [EC:2.3.1.179]	map00061 Fatty acid biosynthesis; map00780 Biotin metabolism; map01100 Metabolic pathways; map01212 Fatty acid metabolism				PF00109; PF02801	Beta-ketoacyl synthase, N-terminal domain; Beta-ketoacyl synthase, C-terminal domain	IQ	KOG1394	3-oxoacyl-(acyl-carrier-protein) synthase (I and II)
A0A1U8GL82	transcription initiation factor TFIID subunit 4b isoform X1(predicted) OS=Capsicum annuum OX=4072 GN=T459_13007 PE=4 SV=1	T459_13007	102.7	0.977	0.902	0.926	1.044	1.071	1.086	0.943	0.961	0.908	1.08	1.042	1.072	0.978	0.976	0.98	1.017	1.078	0.977	0.876	0.00718616	0.88	0.00306277	0.955	0.189383	nucleus	K03129	TAF4; transcription initiation factor TFIID subunit 4	map03022 Basal transcription factors	GO:0006139 nucleobase-containing compound metabolic process; GO:0006351 transcription, DNA-templated; GO:0006352 DNA-templated transcription, initiation; GO:0006355 regulation of transcription, DNA-templated; GO:0006357 regulation of transcription by RNA polymerase II; GO:0006366 transcription by RNA polymerase II; GO:0006367 transcription initiation from RNA polymerase II promoter; GO:0006725 ce…	GO:0000428 DNA-directed RNA polymerase complex; GO:0001650 fibrillar center; GO:0005622 intracellular; GO:0005623 cell; GO:0005634 nucleus; GO:0005654 nucleoplasm; GO:0005667 transcription regulator complex; GO:0005669 transcription factor TFIID complex; GO:0005730 nucleolus; GO:0005911 cell-cell junction; GO:0009506 plasmodesma; GO:0016591 RNA polymerase II, holoenzyme; GO:0030054 cell junction;…	GO:0003676 nucleic acid binding; GO:0003677 DNA binding; GO:0003712 transcription coregulator activity; GO:0003713 transcription coactivator activity; GO:0005488 binding; GO:0005515 protein binding; GO:0008134 transcription factor binding; GO:0051059 NF-kappaB binding; GO:0097159 organic cyclic compound binding; GO:0140110 transcription regulator activity; GO:1901363 heterocyclic compound binding;	PF12174	RCD1-SRO-TAF4 (RST) plant domain	K	KOG2341	TATA box binding protein (TBP)-associated factor, RNA polymerase II
A0A1U8H9F9	ADP-ribosylation factor-like protein 2 OS=Capsicum annuum OX=4072 GN=T459_19454 PE=3 SV=1	T459_19454	21.2	1.083	1.095	1.163	0.912	0.884	0.913	0.993	1.057	1.151	0.993	0.958	0.95	1.094	1.141	0.952	0.965	0.926	0.934	1.233	0.00103797	1.103	0.0974149	1.128	0.103902	cytoplasm,nucleus	K07943	ARL2; ADP-ribosylation factor-like protein 2		GO:0000003 reproduction; GO:0003006 developmental process involved in reproduction; GO:0007021 tubulin complex assembly; GO:0007275 multicellular organism development; GO:0007349 cellularization; GO:0009553 embryo sac development; GO:0009558 embryo sac cellularization; GO:0009561 megagametogenesis; GO:0009653 anatomical structure morphogenesis; GO:0009790 embryo development; GO:0009791 post-embry…		GO:0000166 nucleotide binding; GO:0001882 nucleoside binding; GO:0001883 purine nucleoside binding; GO:0005488 binding; GO:0005525 GTP binding; GO:0017076 purine nucleotide binding; GO:0019001 guanyl nucleotide binding; GO:0032549 ribonucleoside binding; GO:0032550 purine ribonucleoside binding; GO:0032553 ribonucleotide binding; GO:0032555 purine ribonucleotide binding; GO:0032561 guanyl ribonuc…	PF00025	ADP-ribosylation factor family	U	KOG0073	GTP-binding ADP-ribosylation factor-like protein ARL2
A0A2G2ZXW1	Putative mitochondrial inner membrane protease subunit 2-like(predicted) OS=Capsicum annuum OX=4072 GN=T459_08933 PE=4 SV=1	T459_08933	23.9	0.95	0.986	0.996	1.014	1.01	1.031	1.018	1.037	1.08	0.913	0.938	0.998	1.048	1.127	1.074	1.008	0.941	0.86	0.96	0.0583009	1.1	0.0384538	1.157	0.0439728	cytoplasm									OU	KOG1568	Mitochondrial inner membrane protease, subunit IMP2
A0A2G2YPW6	BTP domain-containing protein OS=Capsicum annuum OX=4072 GN=T459_22582 PE=4 SV=1	T459_22582	41.3	1.056	0.966	0.942	1.06	1.014	0.968	0.956	0.94	0.996	0.971	1.12	1.023							0.974	0.574886	0.929	0.183226			nucleus	K14649	TAF8; transcription initiation factor TFIID subunit 8	map03022 Basal transcription factors				PF07524; PF10406	Bromodomain associated; Transcription factor TFIID complex subunit 8 C-term	K	KOG2389	Predicted bromodomain transcription factor
A0A2G2Z5K7	Aconitate hydratase OS=Capsicum annuum OX=4072 GN=T459_20766 PE=3 SV=1	T459_20766	106	0.986	0.994	0.97	1.011	1.053	1.028	0.974	0.96	1.01	1.015	1.007	1	0.984	1.001	0.982	1.029	1.006	1.005	0.954	0.0274503	0.974	0.168488	0.976	0.0686262	chloroplast	K01681	ACO, acnA; aconitate hydratase [EC:4.2.1.3]	map00020 Citrate cycle (TCA cycle); map00630 Glyoxylate and dicarboxylate metabolism; map01100 Metabolic pathways; map01110 Biosynthesis of secondary metabolites; map01200 Carbon metabolism; map01210 2-Oxocarboxylic acid metabolism; map01230 Biosynthesis of amino acids				PF00694	Aconitase C-terminal domain	C	KOG0452	RNA-binding translational regulator IRP (aconitase superfamily)
A0A1U8G4P4	Checkpoint protein OS=Capsicum annuum OX=4072 GN=T459_10600 PE=3 SV=1	T459_10600	36.4	1.055	1.108	0.915	1.051	1.003	0.875	1.025	1.047	1.087	0.974	0.94	0.935							1.051	0.568278	1.109	0.00856275			nucleus	K10903	HUS1; HUS1 checkpoint protein							DL	KOG3999	Checkpoint 9-1-1 complex, HUS1 component
A0A1U8FAN4	V-type proton ATPase catalytic subunit A OS=Capsicum annuum OX=4072 GN=T459_17256 PE=3 SV=1	T459_17256	68.7	0.976	0.98	0.987	1.032	1.028	1.026	0.98	0.949	0.929	1.062	1.061	1.064	0.963	0.96	0.963	1.019	1.041	1.034	0.954	0.000212105	0.897	0.00216889	0.933	0.000404182	cytoplasm	K02145	ATPeV1A, ATP6A; V-type H+-transporting ATPase subunit A [EC:7.1.2.2]	map00190 Oxidative phosphorylation; map01100 Metabolic pathways; map04145 Phagosome	GO:0006810 transport; GO:0006811 ion transport; GO:0006812 cation transport; GO:0006950 response to stress; GO:0006970 response to osmotic stress; GO:0006996 organelle organization; GO:0007030 Golgi organization; GO:0007275 multicellular organism development; GO:0009555 pollen development; GO:0009628 response to abiotic stimulus; GO:0009651 response to salt stress; GO:0009987 cellular process; GO…	GO:0000325 plant-type vacuole; GO:0005576 extracellular region; GO:0005618 cell wall; GO:0005622 intracellular; GO:0005623 cell; GO:0005737 cytoplasm; GO:0005773 vacuole; GO:0005774 vacuolar membrane; GO:0005794 Golgi apparatus; GO:0005886 plasma membrane; GO:0005911 cell-cell junction; GO:0009506 plasmodesma; GO:0009507 chloroplast; GO:0009526 plastid envelope; GO:0009536 plastid; GO:0009941 chl…	GO:0002020 protease binding; GO:0003824 catalytic activity; GO:0005215 transporter activity; GO:0005488 binding; GO:0005515 protein binding; GO:0008324 cation transmembrane transporter activity; GO:0015075 ion transmembrane transporter activity; GO:0015077 monovalent inorganic cation transmembrane transporter activity; GO:0015078 proton transmembrane transporter activity; GO:0015318 inorganic mol…	PF02874; PF00006	ATP synthase alpha/beta family, beta-barrel domain; ATP synthase alpha/beta family, nucleotide-binding domain	C	KOG1352	Vacuolar H+-ATPase V1 sector, subunit A
A0A2G2ZEA5	J domain-containing protein OS=Capsicum annuum OX=4072 GN=T459_18389 PE=4 SV=1	T459_18389	57.5	0.976	0.95	0.896	1	1.07	1.035	0.97	0.949	0.978	1.091	0.959	1.044	0.94	0.914	0.917	1.047	1.097	1.078	0.909	0.0398518	0.936	0.172891	0.86	0.000749402	nucleus				GO:0006810 transport; GO:0006897 endocytosis; GO:0006898 receptor-mediated endocytosis; GO:0016192 vesicle-mediated transport; GO:0051179 localization; GO:0051234 establishment of localization; GO:0072583 clathrin-dependent endocytosis; GO:0098657 import into cell;	GO:0005622 intracellular; GO:0005623 cell; GO:0005737 cytoplasm; GO:0005829 cytosol; GO:0005886 plasma membrane; GO:0009504 cell plate; GO:0016020 membrane; GO:0031982 vesicle; GO:0043226 organelle; GO:0043227 membrane-bounded organelle; GO:0071944 cell periphery;				S	KOG0431	Auxilin-like protein and related proteins containing DnaJ domain
A0A1U8EQ42	Putative ataxin-3-like protein OS=Capsicum annuum OX=4072 GN=T459_25302 PE=4 SV=1	T459_25302	30.2	0.957	0.924	0.95	1.142	0.93	1.105													0.891	0.159404					nucleus	K11863	ATXN3, MJD; Ataxin-3 [EC:3.4.22.-]	map04141 Protein processing in endoplasmic reticulum						O	KOG2935	Ataxin 3/Josephin
A0A2G2YZD7	Putative myelin-associated oligodendrocyte basic protein-like(predicted) OS=Capsicum annuum OX=4072 GN=T459_22252 PE=4 SV=1	T459_22252	44.4	1.068	1.031	1.036	1.027	0.913	0.931	1.006	1.033	0.994	0.94	0.971	1.063							1.092	0.0789926	1.02	0.616483			chloroplast
A0A1U8DSA1	Galactose-binding domain-like protein(predicted) OS=Capsicum annuum OX=4072 GN=T459_21618 PE=4 SV=1	T459_21618	40.6	1.036	1.034	1.035	0.962	0.956	1.007	1.043	1.027	1.015	0.954	0.954	0.988	1.168	1.119	1.123	0.889	0.915	0.867	1.062	0.0215828	1.065	0.0108703	1.277	0.000298155	cytoplasm							PF04862	Protein of unknown function, DUF642
A0A1U8EDR8	LIMR family protein OS=Capsicum annuum OX=4072 GN=T459_23441 PE=4 SV=1	T459_23441	56.3	1.01	0.989	1.022	0.995	1.085	0.906	1	1.009	0.975	0.998	1.03	0.996	1.01	1.019	0.988	1.05	0.982	0.96	1.012	0.80088	0.987	0.423861	1.008	0.76824	plasma membrane	K14617	LMBRD1; LMBR1 domain-containing protein 1			GO:0005623 cell; GO:0005886 plasma membrane; GO:0005911 cell-cell junction; GO:0009506 plasmodesma; GO:0016020 membrane; GO:0030054 cell junction; GO:0055044 symplast; GO:0071944 cell periphery;
A0A2G2YW69	Putative peroxygenase 4 OS=Capsicum annuum OX=4072 GN=T459_21295 PE=4 SV=1	T459_21295	21.4	1.041	0.911	0.952	1.036	1.037	1.03	0.982	0.952	1.002	1.05	1.032	0.991	1.049	0.996	0.971	0.914	1	1.026	0.936	0.159448	0.955	0.115347	1.026	0.564287	cytoplasm	K17991	PXG; peroxygenase [EC:1.11.2.3]	map00073 Cutin, suberine and wax biosynthesis	GO:0001101 response to acid chemical; GO:0006950 response to stress; GO:0009414 response to water deprivation; GO:0009415 response to water; GO:0009628 response to abiotic stimulus; GO:0009719 response to endogenous stimulus; GO:0009725 response to hormone; GO:0009737 response to abscisic acid; GO:0009819 drought recovery; GO:0010033 response to organic substance; GO:0010035 response to inorganic…		GO:0003824 catalytic activity; GO:0016298 lipase activity; GO:0016787 hydrolase activity; GO:0016788 hydrolase activity, acting on ester bonds;
A0A1U8E7N6	NADH dehydrogenase [ubiquinone] 1 beta subcomplex subunit 9 OS=Capsicum annuum OX=4072 GN=T459_01412 PE=3 SV=1	T459_01412	13.9	0.952	0.967	0.911	1.031	1.033	1.123	1.017	1.015	0.991	0.969	0.935	1.05	1.014	1.022	1.018	0.964	0.956	0.982	0.888	0.0238625	1.023	0.530535	1.052	0.00344779	mitochondria	K03965	NDUFB9; NADH dehydrogenase (ubiquinone) 1 beta subcomplex subunit 9	map00190 Oxidative phosphorylation; map01100 Metabolic pathways						C	KOG3466	NADH:ubiquinone oxidoreductase, NDUFB9/B22 subunit
A0A2G2ZS52	Protein BZR1-like protein 1 OS=Capsicum annuum OX=4072 GN=T459_13214 PE=4 SV=1	T459_13214	33.3	0.936	0.914	0.874	1.115	1.018	1.151							0.886	0.893	0.961	0.982	1.087	1.194	0.829	0.0113588			0.84	0.0501706	nucleus	K14503	BZR1_2; brassinosteroid resistant 1/2	map04075 Plant hormone signal transduction	GO:0000003 reproduction; GO:0003006 developmental process involved in reproduction; GO:0006355 regulation of transcription, DNA-templated; GO:0007154 cell communication; GO:0007165 signal transduction; GO:0007275 multicellular organism development; GO:0009653 anatomical structure morphogenesis; GO:0009719 response to endogenous stimulus; GO:0009725 response to hormone; GO:0009741 response to bras…	GO:0005622 intracellular; GO:0005623 cell; GO:0005634 nucleus; GO:0005737 cytoplasm; GO:0005829 cytosol; GO:0043226 organelle; GO:0043227 membrane-bounded organelle; GO:0043229 intracellular organelle; GO:0043231 intracellular membrane-bounded organelle;	GO:0003676 nucleic acid binding; GO:0003677 DNA binding; GO:0003700 DNA-binding transcription factor activity; GO:0005488 binding; GO:0097159 organic cyclic compound binding; GO:0140110 transcription regulator activity; GO:1901363 heterocyclic compound binding;
A0A1U8FXZ1	60S ribosomal protein L27a OS=Capsicum annuum OX=4072 GN=T459_10128 PE=3 SV=1	T459_10128	16.6	1.014	1.007	1.003	1.038	0.955	1.003	1.021	0.968	0.964	1	1.009	0.988	1.044	1.03	0.959	0.986	0.968	0.979	1.009	0.706294	0.985	0.481497	1.034	0.288676	nucleus	K02900	RP-L27Ae, RPL27A; large subunit ribosomal protein L27Ae	map03010 Ribosome						J	KOG1742	60s ribosomal protein L15/L27
A0A2G2ZW14	Putative inactive receptor kinase OS=Capsicum annuum OX=4072 GN=T459_08265 PE=4 SV=1	T459_08265	69.8	1.12	1.006	1.078	0.967	0.942	0.894	0.934	1.026	0.938	1.033	0.995	1.07	1.064	1.065	0.953	0.973	0.997	0.938	1.143	0.0268062	0.935	0.144341	1.06	0.235506	plasma membrane					GO:0005623 cell; GO:0005886 plasma membrane; GO:0016020 membrane; GO:0071944 cell periphery;		PF00069	Protein kinase domain
A0A2G2YCM7	NAC domain-containing protein 8 (Fragment) OS=Capsicum annuum OX=4072 GN=T459_26992 PE=4 SV=1	T459_26992	49.1	0.944	1.026	1.047	1.002	0.911	1.075	0.966	0.975	1.01	1.018	0.956	1.082							1.01	0.858162	0.966	0.425688			nucleus				GO:0000075 cell cycle checkpoint; GO:0000077 DNA damage checkpoint; GO:0006355 regulation of transcription, DNA-templated; GO:0006950 response to stress; GO:0006974 cellular response to DNA damage stimulus; GO:0009314 response to radiation; GO:0009628 response to abiotic stimulus; GO:0009889 regulation of biosynthetic process; GO:0009987 cellular process; GO:0010212 response to ionizing radiation…		GO:0003676 nucleic acid binding; GO:0003677 DNA binding; GO:0003700 DNA-binding transcription factor activity; GO:0005488 binding; GO:0043565 sequence-specific DNA binding; GO:0097159 organic cyclic compound binding; GO:0140110 transcription regulator activity; GO:1901363 heterocyclic compound binding;
A0A1U8E1I0	putative methyltransferase C9orf114 homolog isoform X2(predicted) OS=Capsicum annuum OX=4072 GN=T459_02828 PE=4 SV=1	T459_02828	40.4	1.06	0.812	0.953	1.104	1.072	1.006													0.888	0.205225					cytoplasm	K09142	K09142; uncharacterized protein							S	KOG3925	Uncharacterized conserved protein
A0A1U8HIY4	TATA-box-binding protein (Fragment) OS=Capsicum annuum OX=4072 GN=T459_01901 PE=3 SV=1	T459_01901	22.3							0.893	1.137	0.954	0.984	1.019	1.019	0.915	1.032	1.005	0.958	1.059	1.039			0.987	0.819447	0.966	0.503838	nucleus	K03120	TBP, tbp; transcription initiation factor TFIID TATA-box-binding protein	map03022 Basal transcription factors	GO:0006139 nucleobase-containing compound metabolic process; GO:0006351 transcription, DNA-templated; GO:0006352 DNA-templated transcription, initiation; GO:0006725 cellular aromatic compound metabolic process; GO:0006807 nitrogen compound metabolic process; GO:0008152 metabolic process; GO:0009058 biosynthetic process; GO:0009059 macromolecule biosynthetic process; GO:0009987 cellular process; G…	GO:0005622 intracellular; GO:0005623 cell; GO:0005634 nucleus; GO:0043226 organelle; GO:0043227 membrane-bounded organelle; GO:0043229 intracellular organelle; GO:0043231 intracellular membrane-bounded organelle;	GO:0003676 nucleic acid binding; GO:0003677 DNA binding; GO:0005488 binding; GO:0005515 protein binding; GO:0008134 transcription factor binding; GO:0017025 TBP-class protein binding; GO:0097159 organic cyclic compound binding; GO:1901363 heterocyclic compound binding;	PF00352	Transcription factor TFIID (or TATA-binding protein, TBP)	K	KOG3302	TATA-box binding protein (TBP), component of TFIID and TFIIIB
A0A1U8EK12	60S ribosomal protein L21-2 OS=Capsicum annuum OX=4072 GN=T459_26449 PE=4 SV=1	T459_26449	18.6	1.147	1.102	1.164	0.842	0.86	0.89													1.317	0.000279136					cytoplasm	K02889	RP-L21e, RPL21; large subunit ribosomal protein L21e	map03010 Ribosome	GO:0006412 translation; GO:0006518 peptide metabolic process; GO:0006807 nitrogen compound metabolic process; GO:0008152 metabolic process; GO:0009058 biosynthetic process; GO:0009059 macromolecule biosynthetic process; GO:0009987 cellular process; GO:0010467 gene expression; GO:0019538 protein metabolic process; GO:0034641 cellular nitrogen compound metabolic process; GO:0034645 cellular macromo…	GO:0005622 intracellular; GO:0005623 cell; GO:0005737 cytoplasm; GO:0005829 cytosol; GO:0005840 ribosome; GO:0015934 large ribosomal subunit; GO:0022625 cytosolic large ribosomal subunit; GO:0022626 cytosolic ribosome; GO:0032991 protein-containing complex; GO:0043226 organelle; GO:0043228 non-membrane-bounded organelle; GO:0043229 intracellular organelle; GO:0043232 intracellular non-membrane-bo…	GO:0003735 structural constituent of ribosome; GO:0005198 structural molecule activity;			J	KOG1732	60S ribosomal protein L21
A0A1U8FYL3	Gamma carbonic anhydrase-like 2, mitochondrial OS=Capsicum annuum OX=4072 GN=T459_09991 PE=4 SV=1	T459_09991	28	0.974	0.955	0.942	1.038	1.033	1.065	1.066	1.003	1.061	1.006	0.968	0.95	1.097	1.102	1.025	0.917	0.937	0.926	0.915	0.00286456	1.07	0.0580593	1.16	0.00367195	chloroplast	K01726	GAMMACA; gamma-carbonic anhydrase [EC:4.2.1.-]
A0A2G3AH49	Phospholipase D beta 1 OS=Capsicum annuum OX=4072 GN=T459_01375 PE=4 SV=1	T459_01375	121.5	1.028	0.958	1.083	0.997	0.926	0.973	0.891	1.088	0.98	1.046	0.938	1.035	0.945	0.964	0.955	1.062	1.004	1.097	1.06	0.241421	0.98	0.757964	0.905	0.0204359	nucleus	K01115	PLD1_2; phospholipase D1/2 [EC:3.1.4.4]	map00564 Glycerophospholipid metabolism; map00565 Ether lipid metabolism; map01100 Metabolic pathways; map01110 Biosynthesis of secondary metabolites; map04144 Endocytosis	GO:0002376 immune system process; GO:0006950 response to stress; GO:0006952 defense response; GO:0006955 immune response; GO:0009605 response to external stimulus; GO:0009607 response to biotic stimulus; GO:0009617 response to bacterium; GO:0009814 defense response, incompatible interaction; GO:0009816 defense response to bacterium, incompatible interaction; GO:0010035 response to inorganic subst…	GO:0005911 cell-cell junction; GO:0009506 plasmodesma; GO:0030054 cell junction; GO:0055044 symplast;	GO:0003824 catalytic activity; GO:0004620 phospholipase activity; GO:0004630 phospholipase D activity; GO:0005488 binding; GO:0005543 phospholipid binding; GO:0005546 phosphatidylinositol-4,5-bisphosphate binding; GO:0008081 phosphoric diester hydrolase activity; GO:0008289 lipid binding; GO:0016298 lipase activity; GO:0016787 hydrolase activity; GO:0016788 hydrolase activity, acting on ester bon…	PF00168	C2 domain	I	KOG1329	Phospholipase D1
A0A2G2ZD80	Ribosome-binding factor PSRP1, chloroplastic OS=Capsicum annuum OX=4072 GN=T459_17956 PE=4 SV=1	T459_17956	41.1	1.047	1.012	0.916	0.982	1.052	0.998	1.022	1.052	1.071	0.948	0.933	0.982	1.069	0.996	1.06	0.986	0.949	0.95	0.981	0.678857	1.098	0.00992053	1.083	0.0359457	chloroplast							PF13961	Domain of unknown function (DUF4219)
A0A1U8F9W7	Hypoxanthine phosphoribosyltransferase OS=Capsicum annuum OX=4072 GN=T459_12495 PE=3 SV=1	T459_12495	22	0.946	0.994	1.013	1	1.014	0.988	1.007	0.942	0.995	1.006	1.015	1.014	0.978	0.921	1.029	0.992	1.077	1.018	0.984	0.482353	0.97	0.210884	0.948	0.255418	chloroplast	K00760	hprT, hpt, HPRT1; hypoxanthine phosphoribosyltransferase [EC:2.4.2.8]	map00230 Purine metabolism; map01100 Metabolic pathways; map01110 Biosynthesis of secondary metabolites				PF00156	Phosphoribosyl transferase domain	F	KOG3367	Hypoxanthine-guanine phosphoribosyltransferase
A0A2G2ZAM1	phosphomevalonate kinase-like(predicted) OS=Capsicum annuum OX=4072 GN=T459_17071 PE=4 SV=1	T459_17071	55.1	0.913	0.833	0.997	1.047	1.077	1.137	1.034	0.958	0.893	1.017	1.025	1.08	1.132	0.956	1.022	0.893	0.96	1.047	0.841	0.0377203	0.924	0.157862	1.072	0.359471	chloroplast	K00938	E2.7.4.2, mvaK2; phosphomevalonate kinase [EC:2.7.4.2]	map00900 Terpenoid backbone biosynthesis; map01100 Metabolic pathways; map01110 Biosynthesis of secondary metabolites	GO:0006066 alcohol metabolic process; GO:0006084 acetyl-CoA metabolic process; GO:0006139 nucleobase-containing compound metabolic process; GO:0006163 purine nucleotide metabolic process; GO:0006629 lipid metabolic process; GO:0006637 acyl-CoA metabolic process; GO:0006644 phospholipid metabolic process; GO:0006694 steroid biosynthetic process; GO:0006696 ergosterol biosynthetic process; GO:00067…	GO:0005622 intracellular; GO:0005623 cell; GO:0005737 cytoplasm; GO:0005777 peroxisome; GO:0042579 microbody; GO:0043226 organelle; GO:0043227 membrane-bounded organelle; GO:0043229 intracellular organelle; GO:0043231 intracellular membrane-bounded organelle;	GO:0003824 catalytic activity; GO:0004631 phosphomevalonate kinase activity; GO:0016301 kinase activity; GO:0016740 transferase activity; GO:0016772 transferase activity, transferring phosphorus-containing groups; GO:0016776 phosphotransferase activity, phosphate group as acceptor;			I	KOG4519	Phosphomevalonate kinase
A0A1U8F2R7	TBC1 domain family member 22B OS=Capsicum annuum OX=4072 GN=T459_27885 PE=4 SV=1	T459_27885	51.2	1.042	1.088	1.006	0.973	0.962	0.874	0.974	1.005	0.976	1.039	1.081	0.957	0.971	0.97	0.894	1.038	1.116	1.018	1.116	0.0536037	0.96	0.351476	0.894	0.0455002	nucleus	K20360	TBC1D22, GYP1; TBC1 domain family member 2		GO:0006810 transport; GO:0006886 intracellular protein transport; GO:0008104 protein localization; GO:0015031 protein transport; GO:0015833 peptide transport; GO:0016192 vesicle-mediated transport; GO:0031338 regulation of vesicle fusion; GO:0032879 regulation of localization; GO:0033036 macromolecule localization; GO:0033043 regulation of organelle organization; GO:0034613 cellular protein local…	GO:0005622 intracellular; GO:0005623 cell; GO:0005737 cytoplasm; GO:0005794 Golgi apparatus; GO:0012505 endomembrane system; GO:0043226 organelle; GO:0043227 membrane-bounded organelle; GO:0043229 intracellular organelle; GO:0043231 intracellular membrane-bounded organelle;	GO:0005096 GTPase activator activity; GO:0005488 binding; GO:0005515 protein binding; GO:0008047 enzyme activator activity; GO:0017016 Ras GTPase binding; GO:0017137 Rab GTPase binding; GO:0019899 enzyme binding; GO:0030234 enzyme regulator activity; GO:0030695 GTPase regulator activity; GO:0031267 small GTPase binding; GO:0051020 GTPase binding; GO:0060589 nucleoside-triphosphatase regulator act…			U	KOG1092	Ypt/Rab-specific GTPase-activating protein GYP1
A0A2G2YPM8	Histone deacetylase HDT1 OS=Capsicum annuum OX=4072 GN=T459_22478 PE=4 SV=1	T459_22478	26.6	0.944	0.954	0.924	1.065	1.081	1.038	1.047	1.011	1.023	0.992	0.982	0.952	1.376	1.258	1.276	0.728	0.683	0.698	0.886	0.00134027	1.053	0.0325633	1.854	5.1402e-05	nucleus				GO:0001101 response to acid chemical; GO:0006355 regulation of transcription, DNA-templated; GO:0006950 response to stress; GO:0006970 response to osmotic stress; GO:0009414 response to water deprivation; GO:0009415 response to water; GO:0009628 response to abiotic stimulus; GO:0009651 response to salt stress; GO:0009719 response to endogenous stimulus; GO:0009725 response to hormone; GO:0009737 …	GO:0005622 intracellular; GO:0005623 cell; GO:0005634 nucleus; GO:0005730 nucleolus; GO:0031974 membrane-enclosed lumen; GO:0031981 nuclear lumen; GO:0043226 organelle; GO:0043227 membrane-bounded organelle; GO:0043228 non-membrane-bounded organelle; GO:0043229 intracellular organelle; GO:0043231 intracellular membrane-bounded organelle; GO:0043232 intracellular non-membrane-bounded organelle; GO…	GO:0003676 nucleic acid binding; GO:0003677 DNA binding; GO:0005488 binding; GO:0043565 sequence-specific DNA binding; GO:0097159 organic cyclic compound binding; GO:1901363 heterocyclic compound binding;	PF12874	Zinc-finger of C2H2 type
A0A1U8GMC0	Phosphoglucan phosphatase LSF1, chloroplastic OS=Capsicum annuum OX=4072 GN=T459_12048 PE=4 SV=1	T459_12048	66.6	1.042	1.079	1.064	0.934	0.968	0.916	0.971	0.945	0.919	1.068	1.041	1.062	0.965	0.962	1	0.976	1.06	1.043	1.13	0.00302016	0.894	0.00316285	0.951	0.149451	chloroplast				GO:0000272 polysaccharide catabolic process; GO:0005975 carbohydrate metabolic process; GO:0005976 polysaccharide metabolic process; GO:0005977 glycogen metabolic process; GO:0005982 starch metabolic process; GO:0005983 starch catabolic process; GO:0006073 cellular glucan metabolic process; GO:0006091 generation of precursor metabolites and energy; GO:0006112 energy reserve metabolic process; GO:…	GO:0005622 intracellular; GO:0005623 cell; GO:0005634 nucleus; GO:0005737 cytoplasm; GO:0005783 endoplasmic reticulum; GO:0005789 endoplasmic reticulum membrane; GO:0005791 rough endoplasmic reticulum; GO:0009507 chloroplast; GO:0009532 plastid stroma; GO:0009536 plastid; GO:0009569 chloroplast starch grain; GO:0009570 chloroplast stroma; GO:0012505 endomembrane system; GO:0016020 membrane; GO:00…	GO:0003824 catalytic activity; GO:0005488 binding; GO:0016787 hydrolase activity; GO:0016788 hydrolase activity, acting on ester bonds; GO:0016791 phosphatase activity; GO:0019203 carbohydrate phosphatase activity; GO:0030246 carbohydrate binding; GO:0030247 polysaccharide binding; GO:0042578 phosphoric ester hydrolase activity; GO:2001069 glycogen binding;	PF00782	Dual specificity phosphatase, catalytic domain	GV	KOG1716	Dual specificity phosphatase
A0A1U8DTQ7	calcyclin-binding protein-like(predicted) OS=Capsicum annuum OX=4072 GN=T459_21359 PE=4 SV=1	T459_21359	25	0.913	0.908	0.902	1.093	1.103	1.088	1.022	1.026	1.025	1.028	0.995	0.975	1.062	1.046	1.015	0.994	0.938	0.922	0.829	3.92887e-06	1.025	0.181975	1.094	0.0264993	nucleus	K04507	CACYBP, SIP; calcyclin binding protein					PF09032; PF04969	Siah interacting protein, N terminal ; CS domain	T	KOG3260	Calcyclin-binding protein CacyBP
A0A2G2Y4E1	CID domain-containing protein OS=Capsicum annuum OX=4072 GN=T459_29019 PE=4 SV=1	T459_29019	45.7	0.949	0.997	0.932	1.069	0.975	1.055	0.962	1.072	1.062	1.021	0.953	1.005	1.092	1.046	1.088	0.926	0.96	0.901	0.929	0.104079	1.039	0.403011	1.158	0.00310063	nucleus	K15559	RTT103; regulator of Ty1 transposition protein 103							A	KOG2669	Regulator of nuclear mRNA
A0A1U8F5L2	NEDD8-conjugating enzyme Ubc12 OS=Capsicum annuum OX=4072 GN=T459_30937 PE=3 SV=1	T459_30937	20.9	0.962	1.004	0.891	1.055	1.056	1.039	1.023	1.073	1.046	0.944	0.964	0.96	1.069	0.985	1.106	0.934	0.926	0.99	0.907	0.0489378	1.096	0.0039015	1.109	0.0636411	cytoplasm	K10579	UBE2M, UBC12; ubiquitin-conjugating enzyme E2 M	map04120 Ubiquitin mediated proteolysis				PF00179	Ubiquitin-conjugating enzyme	O	KOG0420	Ubiquitin-protein ligase
A0A1U8FXU7	Putative ovule protein(predicted) OS=Capsicum annuum OX=4072 GN=T459_06248 PE=4 SV=1	T459_06248	17.3	0.875	0.953	0.928	1.188	1.193	0.87	0.795	0.927	1.063	0.939	1.207	1.071	0.966	0.952	0.89	1.15	1.123	0.926	0.848	0.222267	0.866	0.25844	0.878	0.158811	cytoplasm	K02990	RP-S6, MRPS6, rpsF; small subunit ribosomal protein S6	map03010 Ribosome				PF01250	Ribosomal protein S6	J	KOG4708	Mitochondrial ribosomal protein MRP17
A0A2G2Y9C2	Wall-associated receptor kinase-like 20 OS=Capsicum annuum OX=4072 GN=T459_30782 PE=4 SV=1	T459_30782	68.7	0.916	0.945	0.998	1.031	1.058	1.058	0.794	1.023	0.952	1.102	1.024	1.109							0.908	0.0218997	0.856	0.114088			vacuolar membrane				GO:0006464 cellular protein modification process; GO:0006468 protein phosphorylation; GO:0006793 phosphorus metabolic process; GO:0006796 phosphate-containing compound metabolic process; GO:0006807 nitrogen compound metabolic process; GO:0007154 cell communication; GO:0007165 signal transduction; GO:0007166 cell surface receptor signaling pathway; GO:0008152 metabolic process; GO:0009987 cellular…	GO:0005623 cell; GO:0005886 plasma membrane; GO:0016020 membrane; GO:0071944 cell periphery;	GO:0003824 catalytic activity; GO:0004672 protein kinase activity; GO:0004674 protein serine/threonine kinase activity; GO:0016301 kinase activity; GO:0016740 transferase activity; GO:0016772 transferase activity, transferring phosphorus-containing groups; GO:0016773 phosphotransferase activity, alcohol group as acceptor; GO:0140096 catalytic activity, acting on a protein;	PF13947; PF00069	Wall-associated receptor kinase galacturonan-binding; Protein kinase domain	T	KOG1187	Serine/threonine protein kinase
A0A2G2YIG7	PHD-type domain-containing protein OS=Capsicum annuum OX=4072 GN=T459_24613 PE=4 SV=1	T459_24613	138.5	1.075	1.062	1.069	0.943	0.937	0.953	0.949	0.938	1.002	1.006	1.016	1.089	0.8	0.753	0.985	1.15	1.05	1.141	1.132	3.40325e-05	0.929	0.0834997	0.76	0.031358	chloroplast				GO:0002009 morphogenesis of an epithelium; GO:0002165 instar larval or pupal development; GO:0003002 regionalization; GO:0006323 DNA packaging; GO:0006325 chromatin organization; GO:0006333 chromatin assembly or disassembly; GO:0006334 nucleosome assembly; GO:0006355 regulation of transcription, DNA-templated; GO:0006357 regulation of transcription by RNA polymerase II; GO:0006950 response to str…	GO:0005622 intracellular; GO:0005623 cell; GO:0005634 nucleus; GO:0005737 cytoplasm; GO:0005829 cytosol; GO:0043226 organelle; GO:0043227 membrane-bounded organelle; GO:0043229 intracellular organelle; GO:0043231 intracellular membrane-bounded organelle;	GO:0003676 nucleic acid binding; GO:0003677 DNA binding; GO:0003682 chromatin binding; GO:0005488 binding; GO:0005515 protein binding; GO:0031490 chromatin DNA binding; GO:0042393 histone binding; GO:0097159 organic cyclic compound binding; GO:1901363 heterocyclic compound binding; GO:1990841 promoter-specific chromatin binding;	PF13872; PF00628; PF13871	P-loop containing NTP hydrolase pore-1; PHD-finger; Helicase_C-like	KT	KOG1513	Nuclear helicase MOP-3/SNO (DEAD-box superfamily)
A0A2G2ZKZ4	CaM_binding domain-containing protein(predicted) OS=Capsicum annuum OX=4072 GN=T459_11095 PE=4 SV=1	T459_11095	16.1	1.012	0.859	1.034	1.029	1.062	1.009													0.937	0.322694					cytoplasm
A0A2G2Y2N1	Triosephosphate isomerase, chloroplastic OS=Capsicum annuum OX=4072 GN=T459_32095 PE=3 SV=1	T459_32095	38.4	0.909	0.923	0.95	1.063	1.065	1.06	1.035	1.008	1.002	0.978	0.973	0.993	1.104	1.128	1.108	0.872	0.9	0.887	0.873	0.000467464	1.034	0.0449099	1.256	3.55392e-05	chloroplast	K01803	TPI, tpiA; triosephosphate isomerase (TIM) [EC:5.3.1.1]	map00010 Glycolysis / Gluconeogenesis; map00051 Fructose and mannose metabolism; map00562 Inositol phosphate metabolism; map00710 Carbon fixation in photosynthetic organisms; map01100 Metabolic pathways; map01110 Biosynthesis of secondary metabolites; map01200 Carbon metabolism; map01230 Biosynthesis of amino acids	GO:0000003 reproduction; GO:0005975 carbohydrate metabolic process; GO:0005996 monosaccharide metabolic process; GO:0006006 glucose metabolic process; GO:0006066 alcohol metabolic process; GO:0006071 glycerol metabolic process; GO:0006081 cellular aldehyde metabolic process; GO:0006082 organic acid metabolic process; GO:0006090 pyruvate metabolic process; GO:0006091 generation of precursor metabo…	GO:0005576 extracellular region; GO:0005622 intracellular; GO:0005623 cell; GO:0005737 cytoplasm; GO:0005739 mitochondrion; GO:0005829 cytosol; GO:0009507 chloroplast; GO:0009526 plastid envelope; GO:0009532 plastid stroma; GO:0009536 plastid; GO:0009570 chloroplast stroma; GO:0009579 thylakoid; GO:0009941 chloroplast envelope; GO:0031967 organelle envelope; GO:0031975 envelope; GO:0043226 organe…	GO:0003824 catalytic activity; GO:0004807 triose-phosphate isomerase activity; GO:0016853 isomerase activity; GO:0016860 intramolecular oxidoreductase activity; GO:0016861 intramolecular oxidoreductase activity, interconverting aldoses and ketoses;	PF00121	Triosephosphate isomerase	G	KOG1643	Triosephosphate isomerase
A0A2G2ZJK0	Prefoldin subunit 3 OS=Capsicum annuum OX=4072 GN=T459_15178 PE=3 SV=1	T459_15178	18.5	0.9	1.07	1.048	0.987	0.97	1.03	0.893	0.967	1.06	1.027	1.049	1.009	1.079	0.969	1.06	0.929	0.984	0.988	1.01	0.899444	0.947	0.322347	1.071	0.15325	chloroplast				GO:0007017 microtubule-based process; GO:0007021 tubulin complex assembly; GO:0009987 cellular process; GO:0016043 cellular component organization; GO:0022607 cellular component assembly; GO:0034622 cellular protein-containing complex assembly; GO:0043933 protein-containing complex subunit organization; GO:0044085 cellular component biogenesis; GO:0065003 protein-containing complex assembly; GO:0…	GO:0005622 intracellular; GO:0005623 cell; GO:0005737 cytoplasm; GO:0005829 cytosol; GO:0005844 polysome; GO:0016272 prefoldin complex; GO:0032991 protein-containing complex; GO:1990904 ribonucleoprotein complex;	GO:0005488 binding; GO:0005515 protein binding; GO:0008092 cytoskeletal protein binding; GO:0015631 tubulin binding;			O	KOG3313	Molecular chaperone Prefoldin, subunit 3
A0A2G2YKU6	Protein TIC 62, chloroplastic OS=Capsicum annuum OX=4072 GN=T459_25474 PE=4 SV=1	T459_25474	61.1	0.993	0.955	0.935	1.004	0.971	1.052	0.991	0.983	1.014	1.019	1.063	1.022							0.952	0.171571	0.963	0.0826994			chloroplast					GO:0005622 intracellular; GO:0005623 cell; GO:0005737 cytoplasm; GO:0009507 chloroplast; GO:0009526 plastid envelope; GO:0009534 chloroplast thylakoid; GO:0009535 chloroplast thylakoid membrane; GO:0009536 plastid; GO:0009579 thylakoid; GO:0009941 chloroplast envelope; GO:0016020 membrane; GO:0031967 organelle envelope; GO:0031975 envelope; GO:0031976 plastid thylakoid; GO:0031984 organelle subco…		PF13460	NADH(P)-binding	G	KOG1203	Predicted dehydrogenase
A0A2G3A9H3	DUF862 domain-containing protein OS=Capsicum annuum OX=4072 GN=T459_05990 PE=4 SV=1	T459_05990	29.7	0.972	0.902	0.938	1.1	1.042	1.053	0.908	1.036	1.029	1.028	1.054	0.951	1.073	1.003	0.974	0.977	0.972	1.01	0.88	0.00932226	0.98	0.713641	1.031	0.39465	cytoplasm	K22763	DESI2, PPPDE1; deubiquitinase DESI2 [EC:3.4.19.12]					PF05903	PPPDE putative peptidase domain	S	KOG0324	Uncharacterized conserved protein
A0A2G2ZDA8	beta-glucosidase BoGH3B-like isoform X1(predicted) OS=Capsicum annuum OX=4072 GN=T459_18032 PE=4 SV=1	T459_18032	72	0.859	0.814	0.831	1.167	1.192	1.146	0.932	0.907	0.947	1.07	1.004	1.093	1.169	1.132	1.138	0.859	0.864	0.892	0.714	6.44154e-05	0.88	0.0109299	1.315	5.83394e-05	cytoplasm	K05349	bglX; beta-glucosidase [EC:3.2.1.21]	map00460 Cyanoamino acid metabolism; map00500 Starch and sucrose metabolism; map00940 Phenylpropanoid biosynthesis; map01100 Metabolic pathways; map01110 Biosynthesis of secondary metabolites				PF00933; PF01915	Glycosyl hydrolase family 3 N terminal domain; Glycosyl hydrolase family 3 C-terminal domain
A0A1U8GQ71	Zinc finger CCCH domain-containing protein 47 OS=Capsicum annuum OX=4072 GN=T459_15066 PE=4 SV=1	T459_15066	75.7	0.965	0.941	1.079	1.002	1.071	1.118	1.115	1.016	1.302	0.879	0.823	0.874							0.935	0.269877	1.333	0.0199899			nucleus									S	KOG1595	CCCH-type Zn-finger protein
A0A2G2YZU6	Translation initiation factor IF-3 (Fragment) OS=Capsicum annuum OX=4072 GN=T459_18819 PE=3 SV=1	T459_18819	19.4	1.077	0.869	1.004	1.017	0.94	1.01	0.992	1.151	1.099	0.86	0.987	0.918	1.083	1.104	1.072	0.94	0.87	0.94	0.994	0.900469	1.173	0.0552267	1.185	0.00331148	cytoplasm	K02520	infC, MTIF3; translation initiation factor IF-3		GO:0006412 translation; GO:0006413 translational initiation; GO:0006518 peptide metabolic process; GO:0006807 nitrogen compound metabolic process; GO:0006996 organelle organization; GO:0007275 multicellular organism development; GO:0008152 metabolic process; GO:0009058 biosynthetic process; GO:0009059 macromolecule biosynthetic process; GO:0009657 plastid organization; GO:0009658 chloroplast orga…	GO:0005618 cell wall; GO:0005622 intracellular; GO:0005623 cell; GO:0005737 cytoplasm; GO:0009507 chloroplast; GO:0009536 plastid; GO:0030312 external encapsulating structure; GO:0043226 organelle; GO:0043227 membrane-bounded organelle; GO:0043229 intracellular organelle; GO:0043231 intracellular membrane-bounded organelle; GO:0071944 cell periphery;	GO:0003676 nucleic acid binding; GO:0003723 RNA binding; GO:0003743 translation initiation factor activity; GO:0005488 binding; GO:0008135 translation factor activity, RNA binding; GO:0043021 ribonucleoprotein complex binding; GO:0043022 ribosome binding; GO:0044877 protein-containing complex binding; GO:0097159 organic cyclic compound binding; GO:1901363 heterocyclic compound binding;	PF05198; PF00707	Translation initiation factor IF-3, N-terminal domain; Translation initiation factor IF-3, C-terminal domain
A0A1U8EDN2	Putative ovule protein(predicted) OS=Capsicum annuum OX=4072 GN=T459_23505 PE=4 SV=1	T459_23505	19.9	1.018	0.973	0.993	1.067	1.032	1.007	1.062	1.07	1.068	0.906	0.936	0.97	1.094	1.181	1.235	0.84	0.834	0.793	0.961	0.13341	1.138	0.00283396	1.423	0.000902105	chloroplast					GO:0005622 intracellular; GO:0005623 cell; GO:0005737 cytoplasm; GO:0009507 chloroplast; GO:0009532 plastid stroma; GO:0009534 chloroplast thylakoid; GO:0009535 chloroplast thylakoid membrane; GO:0009536 plastid; GO:0009570 chloroplast stroma; GO:0009579 thylakoid; GO:0010287 plastoglobule; GO:0016020 membrane; GO:0031976 plastid thylakoid; GO:0031984 organelle subcompartment; GO:0034357 photosyn…
A0A1U8FU58	uncharacterized metal-dependent hydrolase YabD(predicted) OS=Capsicum annuum OX=4072 GN=T459_05705 PE=4 SV=1	T459_05705	34	1.02	1.031	0.99	1.024	1.021	0.982	1.02	0.976	1.031	0.987	1.019	1.005	0.957	1.006	1.085	1.02	0.94	1.008	1.005	0.810525	1.005	0.80297	1.027	0.591769	nucleus	K03424	tatD; TatD DNase family protein [EC:3.1.21.-]					PF01026	TatD related DNase	L	KOG3020	TatD-related DNase
A0A1U8HF78	RNA polymerase II C-terminal domain phosphatase-like OS=Capsicum annuum OX=4072 GN=T459_18872 PE=4 SV=1	T459_18872	53.7	1.055	0.97	1.083	0.986	0.967	0.945													1.072	0.123265					nucleus	K18999	CPL3_4; RNA polymerase II C-terminal domain phosphatase-like 3/4 [EC:3.1.3.16]		GO:0006355 regulation of transcription, DNA-templated; GO:0006357 regulation of transcription by RNA polymerase II; GO:0006464 cellular protein modification process; GO:0006470 protein dephosphorylation; GO:0006793 phosphorus metabolic process; GO:0006796 phosphate-containing compound metabolic process; GO:0006807 nitrogen compound metabolic process; GO:0006950 response to stress; GO:0006970 resp…	GO:0000428 DNA-directed RNA polymerase complex; GO:0005622 intracellular; GO:0005623 cell; GO:0005634 nucleus; GO:0005654 nucleoplasm; GO:0016591 RNA polymerase II, holoenzyme; GO:0030880 RNA polymerase complex; GO:0031974 membrane-enclosed lumen; GO:0031981 nuclear lumen; GO:0032991 protein-containing complex; GO:0043226 organelle; GO:0043227 membrane-bounded organelle; GO:0043229 intracellular …	GO:0003824 catalytic activity; GO:0004721 phosphoprotein phosphatase activity; GO:0004722 protein serine/threonine phosphatase activity; GO:0005488 binding; GO:0005515 protein binding; GO:0008022 protein C-terminus binding; GO:0008420 RNA polymerase II CTD heptapeptide repeat phosphatase activity; GO:0016787 hydrolase activity; GO:0016788 hydrolase activity, acting on ester bonds; GO:0016791 phos…			K	KOG0323	TFIIF-interacting CTD phosphatases, including NLI-interacting factor
A0A2G2ZQJ0	Protein EXORDIUM-like 2 OS=Capsicum annuum OX=4072 GN=T459_12691 PE=4 SV=1	T459_12691	41	0.954	1.021	0.972	1.003	1.006	1.002	1.01	1	1.081	0.945	0.982	0.972	1.173	1.128	1.136	0.848	0.893	0.849	0.979	0.341004	1.066	0.078106	1.327	0.000170796	endoplasmic reticulum									L	KOG0017	FOG: Transposon-encoded proteins with TYA, reverse transcriptase, integrase domains in various combinations
A0A1U8H630	F-box protein OS=Capsicum annuum OX=4072 GN=T459_16106 PE=4 SV=1	T459_16106	39							0.956	1.088	1.009	1.043	0.948	0.963									1.034	0.534321			cytoplasm	K10268	FBXL2_20; F-box and leucine-rich repeat protein 2/20			GO:0005622 intracellular; GO:0005623 cell; GO:0005737 cytoplasm; GO:0005829 cytosol;				S	KOG1947	Leucine rich repeat proteins, some proteins contain F-box
A0A1U8G567	ASCH domain-containing protein OS=Capsicum annuum OX=4072 GN=T459_07804 PE=4 SV=1	T459_07804	27.9	0.943	0.987	1.013	1.014	1.018	1.03	1.018	1.07	1.027	0.984	0.935	0.984	1.074	1.04	0.958	0.957	0.972	0.969	0.961	0.135241	1.073	0.037046	1.06	0.171402	chloroplast	K23398	TRIP4; activating signal cointegrator 1					PF04266	ASCH domain	K	KOG2845	Activating signal cointegrator 1
A0A1U8G218	N-alpha-acetyltransferase 16, NatA auxiliary subunit(predicted) OS=Capsicum annuum OX=4072 GN=T459_10891 PE=4 SV=1	T459_10891	102.5	1.142	1.169	1.144	0.859	0.854	0.843	0.933	0.984	0.948	1.048	1.05	1.04	0.849	0.855	0.862	1.16	1.148	1.144	1.352	5.51421e-06	0.913	0.00471131	0.743	1.04005e-06	cytoplasm	K20792	NAA15_16; N-alpha-acetyltransferase 15/16, NatA auxiliary subunit							B	KOG1156	N-terminal acetyltransferase
A0A1U8GAZ9	Xylem cysteine proteinase 1 OS=Capsicum annuum OX=4072 GN=T459_13312 PE=3 SV=1	T459_13312	48.6	1.014	0.992	1.062	0.96	0.962	0.962	1.007	1.026	1.037	0.958	1.011	0.946	1.034	1.079	1.112	0.886	0.948	0.983	1.064	0.0378219	1.053	0.077769	1.145	0.0214906	extracellular				GO:0006508 proteolysis; GO:0006807 nitrogen compound metabolic process; GO:0008152 metabolic process; GO:0009056 catabolic process; GO:0009057 macromolecule catabolic process; GO:0009987 cellular process; GO:0019538 protein metabolic process; GO:0030163 protein catabolic process; GO:0043170 macromolecule metabolic process; GO:0044237 cellular metabolic process; GO:0044238 primary metabolic proces…	GO:0000323 lytic vacuole; GO:0005576 extracellular region; GO:0005615 extracellular space; GO:0005622 intracellular; GO:0005623 cell; GO:0005737 cytoplasm; GO:0005764 lysosome; GO:0005773 vacuole; GO:0043226 organelle; GO:0043227 membrane-bounded organelle; GO:0043229 intracellular organelle; GO:0043231 intracellular membrane-bounded organelle;	GO:0003824 catalytic activity; GO:0004175 endopeptidase activity; GO:0004197 cysteine-type endopeptidase activity; GO:0008233 peptidase activity; GO:0008234 cysteine-type peptidase activity; GO:0016787 hydrolase activity; GO:0070011 peptidase activity, acting on L-amino acid peptides; GO:0140096 catalytic activity, acting on a protein;	PF08246; PF00112	Cathepsin propeptide inhibitor domain (I29); Papain family cysteine protease	O	KOG4296	Epithelin/granulin
A0A2G2ZQX3	Kinesin-like protein FRA1 OS=Capsicum annuum OX=4072 GN=T459_12800 PE=3 SV=1	T459_12800	138.8																									nucleus	K10395	KIF4_21_27; kinesin family member 4/21/27					PF00225	Kinesin motor domain	Z	KOG0244	Kinesin-like protein
A0A2G2YZV3	Eukaryotic translation initiation factor isoform 4G-1 OS=Capsicum annuum OX=4072 GN=T459_18822 PE=4 SV=1	T459_18822	85.4	1.021	1.008	0.979	1.017	1.001	1.021	1.016	1.06	1.05	0.96	0.957	0.942	1.013	0.988	0.962	1.032	1.025	1.008	0.99	0.494812	1.093	0.00321764	0.967	0.107806	cytoplasm	K03260	EIF4G; translation initiation factor 4G	map03013 RNA transport		GO:0005622 intracellular; GO:0005623 cell; GO:0005634 nucleus; GO:0005737 cytoplasm; GO:0005829 cytosol; GO:0043226 organelle; GO:0043227 membrane-bounded organelle; GO:0043229 intracellular organelle; GO:0043231 intracellular membrane-bounded organelle;	GO:0003676 nucleic acid binding; GO:0003723 RNA binding; GO:0003729 mRNA binding; GO:0005488 binding; GO:0097159 organic cyclic compound binding; GO:1901363 heterocyclic compound binding;			J	KOG0401	Translation initiation factor 4F, ribosome/mRNA-bridging subunit (eIF-4G)
A0A2G3AGT5	PAP-associated domain-containing protein OS=Capsicum annuum OX=4072 GN=T459_01302 PE=4 SV=1	T459_01302	15.6	0.949	1.011	1.1	1.004	0.969	0.972													1.039	0.454642					cytoplasm				GO:0006139 nucleobase-containing compound metabolic process; GO:0006378 mRNA polyadenylation; GO:0006396 RNA processing; GO:0006397 mRNA processing; GO:0006725 cellular aromatic compound metabolic process; GO:0006807 nitrogen compound metabolic process; GO:0008152 metabolic process; GO:0009893 positive regulation of metabolic process; GO:0009987 cellular process; GO:0010467 gene expression; GO:00…		GO:0003676 nucleic acid binding; GO:0003723 RNA binding; GO:0003729 mRNA binding; GO:0003824 catalytic activity; GO:0005488 binding; GO:0016740 transferase activity; GO:0016772 transferase activity, transferring phosphorus-containing groups; GO:0016779 nucleotidyltransferase activity; GO:0050265 RNA uridylyltransferase activity; GO:0070569 uridylyltransferase activity; GO:0097159 organic cyclic c…			D	KOG2277	S-M checkpoint control protein CID1 and related nucleotidyltransferases
A0A2G2YBE7	DEAD-box ATP-dependent RNA helicase 37 OS=Capsicum annuum OX=4072 GN=T459_31465 PE=4 SV=1	T459_31465	34.4	0.876	1.045	1.031	1.022	0.95	1.081	0.896	0.851	0.856	0.988	1.195	1.215	0.88	0.832	0.879	1.144	0.977	1.29	0.967	0.629721	0.766	0.018424	0.76	0.0311913	chloroplast	K11594	DDX3X, bel; ATP-dependent RNA helicase DDX3X [EC:3.6.4.13]		GO:0006139 nucleobase-containing compound metabolic process; GO:0006725 cellular aromatic compound metabolic process; GO:0006807 nitrogen compound metabolic process; GO:0008152 metabolic process; GO:0009987 cellular process; GO:0010501 RNA secondary structure unwinding; GO:0016070 RNA metabolic process; GO:0034641 cellular nitrogen compound metabolic process; GO:0043170 macromolecule metabolic pr…	GO:0005622 intracellular; GO:0005623 cell; GO:0005634 nucleus; GO:0005730 nucleolus; GO:0005737 cytoplasm; GO:0005777 peroxisome; GO:0005886 plasma membrane; GO:0016020 membrane; GO:0031974 membrane-enclosed lumen; GO:0031981 nuclear lumen; GO:0042579 microbody; GO:0043226 organelle; GO:0043227 membrane-bounded organelle; GO:0043228 non-membrane-bounded organelle; GO:0043229 intracellular organel…	GO:0003676 nucleic acid binding; GO:0003723 RNA binding; GO:0003724 RNA helicase activity; GO:0003729 mRNA binding; GO:0003824 catalytic activity; GO:0004386 helicase activity; GO:0005488 binding; GO:0008186 RNA-dependent ATPase activity; GO:0016462 pyrophosphatase activity; GO:0016787 hydrolase activity; GO:0016817 hydrolase activity, acting on acid anhydrides; GO:0016818 hydrolase activity, act…	PF00270	DEAD/DEAH box helicase	A	KOG0335	ATP-dependent RNA helicase
A0A2G2YA77	protein NRT1/ PTR FAMILY 1.2-like(predicted) OS=Capsicum annuum OX=4072 GN=T459_31067 PE=4 SV=1	T459_31067	37.8	0.957	0.963	1.021	1.018	1.009	1.014	0.959	0.965	0.925	1.001	0.985	1.031	0.951	1.066	1.021	1.041	0.956	0.987	0.967	0.178489	0.944	0.0380134	1.018	0.695923	plasma membrane	K14638	SLC15A3_4, PHT; solute carrier family 15 (peptide/histidine transporter), member 3/4							E	KOG1237	H+/oligopeptide symporter
A0A2G2ZDK4	Putative T6D22.12-like(predicted) OS=Capsicum annuum OX=4072 GN=T459_18131 PE=4 SV=1	T459_18131	44.4	0.938	1.108	0.948	0.998	1.002	1.011							0.883	1	0.948	1.069	1.047	1.056	0.994	0.881197			0.892	0.0346188	cytoplasm
A0A1U8EF12	O-acyltransferase WSD1-like(predicted) OS=Capsicum annuum OX=4072 GN=T459_25086 PE=4 SV=1	T459_25086	58.5	1.171	1.156	1.143	0.84	0.847	0.864	1.019	0.992	1.045	0.964	1.005	0.989	0.989	0.944	0.953	1.088	1.033	1.02	1.36	9.35882e-06	1.033	0.167531	0.919	0.0255116	cytoplasm				GO:0006629 lipid metabolic process; GO:0006638 neutral lipid metabolic process; GO:0006639 acylglycerol metabolic process; GO:0006641 triglyceride metabolic process; GO:0008152 metabolic process; GO:0008610 lipid biosynthetic process; GO:0009058 biosynthetic process; GO:0009987 cellular process; GO:0010025 wax biosynthetic process; GO:0010166 wax metabolic process; GO:0019432 triglyceride biosynt…	GO:0005622 intracellular; GO:0005623 cell; GO:0005737 cytoplasm; GO:0005783 endoplasmic reticulum; GO:0005886 plasma membrane; GO:0012505 endomembrane system; GO:0016020 membrane; GO:0043226 organelle; GO:0043227 membrane-bounded organelle; GO:0043229 intracellular organelle; GO:0043231 intracellular membrane-bounded organelle; GO:0071944 cell periphery;	GO:0003824 catalytic activity; GO:0004144 diacylglycerol O-acyltransferase activity; GO:0008374 O-acyltransferase activity; GO:0016411 acylglycerol O-acyltransferase activity; GO:0016740 transferase activity; GO:0016746 transferase activity, transferring acyl groups; GO:0016747 transferase activity, transferring acyl groups other than amino-acyl groups; GO:0047196 long-chain-alcohol O-fatty-acylt…	PF03007	Wax ester synthase-like Acyl-CoA acyltransferase domain
A0A1U8EXY4	Protein NEN3 OS=Capsicum annuum OX=4072 GN=T459_30990 PE=4 SV=1	T459_30990	55.9	1.017	0.996	1.144	0.938	0.996	0.913							0.927	0.86	1.028	1.009	0.91	1.02	1.109	0.111669			0.958	0.520503	nucleus				GO:0006139 nucleobase-containing compound metabolic process; GO:0006725 cellular aromatic compound metabolic process; GO:0006807 nitrogen compound metabolic process; GO:0006950 response to stress; GO:0006974 cellular response to DNA damage stimulus; GO:0008152 metabolic process; GO:0009987 cellular process; GO:0033554 cellular response to stress; GO:0034641 cellular nitrogen compound metabolic pr…	GO:0005618 cell wall; GO:0005622 intracellular; GO:0005623 cell; GO:0005737 cytoplasm; GO:0005829 cytosol; GO:0005886 plasma membrane; GO:0009380 excinuclease repair complex; GO:0016020 membrane; GO:0030312 external encapsulating structure; GO:0032991 protein-containing complex; GO:0071944 cell periphery; GO:1902494 catalytic complex; GO:1905347 endodeoxyribonuclease complex; GO:1905348 endonucle…	GO:0003824 catalytic activity; GO:0004518 nuclease activity; GO:0004527 exonuclease activity; GO:0008408 3'-5' exonuclease activity; GO:0016787 hydrolase activity; GO:0016788 hydrolase activity, acting on ester bonds;
A0A1U8FYF6	Putative DNA-directed RNA polymerase subunit beta-like(predicted) OS=Capsicum annuum OX=4072 GN=T459_09759 PE=4 SV=1	T459_09759	22.4	1.028	0.953	0.873	1.145	1.004	1.006	0.969	0.928	0.95	1.004	1.031	1.123							0.905	0.192208	0.902	0.0464063			plasma membrane
A0A2G3A163	DUF4110 domain-containing protein OS=Capsicum annuum OX=4072 GN=T459_10079 PE=4 SV=1	T459_10079	77.6	1.05	1.085	1.068	0.91	1	0.898	0.883	0.983	1.027	1.026	1.004	1.08	0.841	0.855	0.831	1.069	1.042	1.163	1.141	0.0195509	0.93	0.212373	0.772	0.00165549	nucleus							PF13415	Galactose oxidase, central domain	S	KOG1230	Protein containing repeated kelch motifs
A0A2G3AM22	protein TRIGALACTOSYLDIACYLGLYCEROL 4, chloroplastic(predicted) OS=Capsicum annuum OX=4072 GN=T459_03169 PE=4 SV=1	T459_03169	47.5	1.048	1.036	0.99	0.915	0.968	0.951	1.053	0.9	1.026	0.887	0.999	1.14	1.085	1.099	1.04	0.903	0.96	0.945	1.085	0.0278079	0.984	0.891124	1.148	0.00507578	cytoplasm
A0A2G2ZD48	Golgi apparatus membrane protein TVP23 OS=Capsicum annuum OX=4072 GN=T459_17974 PE=3 SV=1	T459_17974	21.3	0.83	0.998	1.096	1.014	1.132	0.933	0.948	1.008	0.992	0.952	1.044	1.059	1.054	1.037	1.021	0.965	0.998	0.934	0.95	0.607736	0.965	0.411742	1.074	0.027619	vacuolar membrane				GO:0000902 cell morphogenesis; GO:0002790 peptide secretion; GO:0006810 transport; GO:0006996 organelle organization; GO:0007030 Golgi organization; GO:0008104 protein localization; GO:0009306 protein secretion; GO:0009653 anatomical structure morphogenesis; GO:0009826 unidimensional cell growth; GO:0009987 cellular process; GO:0010256 endomembrane system organization; GO:0015031 protein transpor…	GO:0000139 Golgi membrane; GO:0005622 intracellular; GO:0005623 cell; GO:0005737 cytoplasm; GO:0005768 endosome; GO:0005769 early endosome; GO:0005794 Golgi apparatus; GO:0005802 trans-Golgi network; GO:0010008 endosome membrane; GO:0012505 endomembrane system; GO:0016020 membrane; GO:0016021 integral component of membrane; GO:0030173 integral component of Golgi membrane; GO:0031090 organelle mem…				S	KOG3195	Uncharacterized membrane protein NPD008/CGI-148
A0A2G3AHA9	D-xylose dehydrogenase(predicted) OS=Capsicum annuum OX=4072 GN=T459_01517 PE=4 SV=1	T459_01517	81.3	0.994	0.974	0.999	1.01	1.021	0.992	1.032	1.023	1.046	0.984	0.988	0.934	1.091	1.117	1.136	0.879	0.89	0.914	0.981	0.177394	1.067	0.0274211	1.246	0.000179251	chloroplast							PF00168	C2 domain
A0A2G3AGA3	ABC transporter C family member 2 OS=Capsicum annuum OX=4072 GN=T459_01139 PE=4 SV=1	T459_01139	151.3	1.008	1.106	1.116	0.865	0.963	0.963	0.968	0.957	0.974	1.038	1.044	1.019	0.946	0.968	0.935	1.01	1.059	1.04	1.157	0.0389488	0.935	0.00166905	0.916	0.00705209	chloroplast	K05665	ABCC1; ATP-binding cassette, subfamily C (CFTR/MRP), member 1 [EC:7.6.2.3]	map02010 ABC transporters	GO:0006810 transport; GO:0006811 ion transport; GO:0006812 cation transport; GO:0006820 anion transport; GO:0015698 inorganic anion transport; GO:0015700 arsenite transport; GO:0034220 ion transmembrane transport; GO:0042221 response to chemical; GO:0042946 glucoside transport; GO:0046685 response to arsenic-containing substance; GO:0050896 response to stimulus; GO:0051179 localization; GO:005123…	GO:0000325 plant-type vacuole; GO:0005622 intracellular; GO:0005623 cell; GO:0005737 cytoplasm; GO:0005773 vacuole; GO:0005774 vacuolar membrane; GO:0005911 cell-cell junction; GO:0009506 plasmodesma; GO:0016020 membrane; GO:0030054 cell junction; GO:0031090 organelle membrane; GO:0043226 organelle; GO:0043227 membrane-bounded organelle; GO:0043229 intracellular organelle; GO:0043231 intracellula…	GO:0003824 catalytic activity; GO:0005215 transporter activity; GO:0008324 cation transmembrane transporter activity; GO:0008490 arsenite secondary active transmembrane transporter activity; GO:0008509 anion transmembrane transporter activity; GO:0015075 ion transmembrane transporter activity; GO:0015103 inorganic anion transmembrane transporter activity; GO:0015105 arsenite transmembrane transpo…	PF00005	ABC transporter	Q	KOG0054	Multidrug resistance-associated protein/mitoxantrone resistance protein, ABC superfamily
A0A1U8DRS8	Ferrochelatase OS=Capsicum annuum OX=4072 GN=T459_21457 PE=3 SV=1	T459_21457	54.6	1.157	1.023	0.92	0.923	1.024	0.96							0.746	0.864	0.861	1.168	1.154	1.187	1.066	0.450664			0.704	0.00197887	chloroplast	K01772	hemH, FECH; protoporphyrin/coproporphyrin ferrochelatase [EC:4.99.1.1 4.99.1.9]	map00860 Porphyrin and chlorophyll metabolism; map01100 Metabolic pathways; map01110 Biosynthesis of secondary metabolites	GO:0006725 cellular aromatic compound metabolic process; GO:0006778 porphyrin-containing compound metabolic process; GO:0006779 porphyrin-containing compound biosynthetic process; GO:0006783 heme biosynthetic process; GO:0006807 nitrogen compound metabolic process; GO:0006950 response to stress; GO:0006979 response to oxidative stress; GO:0008152 metabolic process; GO:0009058 biosynthetic process…	GO:0005622 intracellular; GO:0005623 cell; GO:0005737 cytoplasm; GO:0005739 mitochondrion; GO:0009507 chloroplast; GO:0009536 plastid; GO:0043226 organelle; GO:0043227 membrane-bounded organelle; GO:0043229 intracellular organelle; GO:0043231 intracellular membrane-bounded organelle;	GO:0003824 catalytic activity; GO:0004325 ferrochelatase activity; GO:0016829 lyase activity;	PF00762	Ferrochelatase	H	KOG1321	Protoheme ferro-lyase (ferrochelatase)
A0A1U8EHS4	Glucuronoxylan 4-O-methyltransferase 2 OS=Capsicum annuum OX=4072 GN=T459_26129 PE=4 SV=1	T459_26129	33.9	1.106	1.072	1.104	0.877	0.846	0.999	1.013	0.918	0.939	1.046	1.046	1.047	1.07	1.033	1.017	0.981	0.946	0.933	1.206	0.0211846	0.914	0.0384648	1.091	0.0148051	nucleus	K18801	GXM; glucuronoxylan 4-O-methyltransferase [EC:2.1.1.112]
A0A1U8GQ63	Mediator of RNA polymerase II transcription subunit 32 OS=Capsicum annuum OX=4072 GN=T459_00679 PE=4 SV=1	T459_00679	15.4	0.985	0.927	1.014	1.019	1.077	0.984	1.078	1.059	0.993	0.973	1.002	0.904							0.95	0.240835	1.087	0.100807			chloroplast				GO:0000302 response to reactive oxygen species; GO:0006950 response to stress; GO:0006979 response to oxidative stress; GO:0007275 multicellular organism development; GO:0009266 response to temperature stimulus; GO:0009409 response to cold; GO:0009628 response to abiotic stimulus; GO:0009631 cold acclimation; GO:0009636 response to toxic substance; GO:0010035 response to inorganic substance; GO:0…	GO:0005622 intracellular; GO:0005623 cell; GO:0005634 nucleus; GO:0005654 nucleoplasm; GO:0016592 mediator complex; GO:0031974 membrane-enclosed lumen; GO:0031981 nuclear lumen; GO:0032991 protein-containing complex; GO:0043226 organelle; GO:0043227 membrane-bounded organelle; GO:0043229 intracellular organelle; GO:0043231 intracellular membrane-bounded organelle; GO:0043233 organelle lumen; GO:0…
A0A2G2Z7P3	Photosystem II CP47 reaction center protein OS=Capsicum annuum OX=4072 GN=T459_16080 PE=3 SV=1	T459_16080	58.3	1.028	1.031	1.012	0.965	0.981	0.972	1.006	0.982	1.023	1.005	0.995	0.993	1.14	1.098	1.094	0.874	0.905	0.908	1.052	0.00240699	1.006	0.661645	1.24	0.000277966	cytoplasm	K02704	psbB; photosystem II CP47 chlorophyll apoprotein	map00195 Photosynthesis; map01100 Metabolic pathways	GO:0006091 generation of precursor metabolites and energy; GO:0008152 metabolic process; GO:0009987 cellular process; GO:0010207 photosystem II assembly; GO:0015979 photosynthesis; GO:0016043 cellular component organization; GO:0019684 photosynthesis, light reaction; GO:0022607 cellular component assembly; GO:0034622 cellular protein-containing complex assembly; GO:0043933 protein-containing comp…	GO:0005622 intracellular; GO:0005623 cell; GO:0005737 cytoplasm; GO:0009507 chloroplast; GO:0009532 plastid stroma; GO:0009534 chloroplast thylakoid; GO:0009535 chloroplast thylakoid membrane; GO:0009536 plastid; GO:0009570 chloroplast stroma; GO:0009579 thylakoid; GO:0010287 plastoglobule; GO:0016020 membrane; GO:0031976 plastid thylakoid; GO:0031984 organelle subcompartment; GO:0034357 photosyn…
A0A2G2YS29	Peptidylprolyl isomerase OS=Capsicum annuum OX=4072 GN=T459_23279 PE=4 SV=1	T459_23279	16	0.968	0.942	0.947	1.05	1.048	1.042	1.06	1.048	1.018	0.997	0.984	0.928	1.154	1.143	1.106	0.874	0.866	0.877	0.91	0.000397657	1.075	0.0451173	1.3	4.01323e-05	extracellular	K09569	FKBP2; FK506-binding protein 2 [EC:5.2.1.8]		GO:0000413 protein peptidyl-prolyl isomerization; GO:0006457 protein folding; GO:0006464 cellular protein modification process; GO:0006807 nitrogen compound metabolic process; GO:0008152 metabolic process; GO:0009987 cellular process; GO:0018193 peptidyl-amino acid modification; GO:0018208 peptidyl-proline modification; GO:0019538 protein metabolic process; GO:0036211 protein modification process…	GO:0005622 intracellular; GO:0005623 cell; GO:0005737 cytoplasm; GO:0005773 vacuole; GO:0005783 endoplasmic reticulum; GO:0005794 Golgi apparatus; GO:0005829 cytosol; GO:0012505 endomembrane system; GO:0043226 organelle; GO:0043227 membrane-bounded organelle; GO:0043229 intracellular organelle; GO:0043231 intracellular membrane-bounded organelle;	GO:0003755 peptidyl-prolyl cis-trans isomerase activity; GO:0003824 catalytic activity; GO:0005488 binding; GO:0005527 macrolide binding; GO:0005528 FK506 binding; GO:0008144 drug binding; GO:0016853 isomerase activity; GO:0016859 cis-trans isomerase activity; GO:0097159 organic cyclic compound binding; GO:0140096 catalytic activity, acting on a protein; GO:1901363 heterocyclic compound binding;	PF00254	FKBP-type peptidyl-prolyl cis-trans isomerase	O	KOG0549	FKBP-type peptidyl-prolyl cis-trans isomerase
A0A1U8F4S8	Osmotin-like protein OS=Capsicum annuum OX=4072 GN=T459_28171 PE=4 SV=1	T459_28171	27.3	0.986	0.994	0.941	1.042	1.006	1.036	1.007	1.017	0.979	1.035	0.994	1.016	1.108	1.216	1.14	0.88	0.833	0.835	0.947	0.0546734	0.986	0.443113	1.359	0.000731197	chloroplast							PF00314	Thaumatin family	O	KOG0800	FOG: Predicted E3 ubiquitin ligase
A0A2G2Y491	2-oxoisovalerate dehydrogenase subunit alpha 1, mitochondrial OS=Capsicum annuum OX=4072 GN=T459_28990 PE=4 SV=1	T459_28990	51.7	0.995	0.962	1.003	1.003	1	1.022	0.98	1.038	1.03	0.975	0.938	0.953	1.017	1.052	0.968	0.988	0.99	0.964	0.979	0.20621	1.064	0.0445158	1.032	0.289459	chloroplast	K00166	BCKDHA, bkdA1; 2-oxoisovalerate dehydrogenase E1 component alpha subunit [EC:1.2.4.4]	map00280 Valine, leucine and isoleucine degradation; map00640 Propanoate metabolism; map01100 Metabolic pathways; map01110 Biosynthesis of secondary metabolites	GO:0006082 organic acid metabolic process; GO:0006520 cellular amino acid metabolic process; GO:0006807 nitrogen compound metabolic process; GO:0008152 metabolic process; GO:0009056 catabolic process; GO:0009063 cellular amino acid catabolic process; GO:0009081 branched-chain amino acid metabolic process; GO:0009083 branched-chain amino acid catabolic process; GO:0009987 cellular process; GO:0016…	GO:0005622 intracellular; GO:0005623 cell; GO:0005737 cytoplasm; GO:0005739 mitochondrion; GO:0005759 mitochondrial matrix; GO:0017086 3-methyl-2-oxobutanoate dehydrogenase (lipoamide) complex; GO:0031974 membrane-enclosed lumen; GO:0032991 protein-containing complex; GO:0043226 organelle; GO:0043227 membrane-bounded organelle; GO:0043229 intracellular organelle; GO:0043231 intracellular membrane…	GO:0003824 catalytic activity; GO:0003826 alpha-ketoacid dehydrogenase activity; GO:0016491 oxidoreductase activity;			C	KOG1182	Branched chain alpha-keto acid dehydrogenase complex, alpha subunit
A0A1U8EPE0	40S ribosomal protein S9 OS=Capsicum annuum OX=4072 GN=T459_27355 PE=3 SV=1	T459_27355	22.9	1.295	1.341	1.267	0.701	0.683	0.717	1.002	1.04	1.014	0.968	0.969	1.015	1.089	1.134	1.087	0.901	0.858	0.88	1.858	8.94903e-06	1.035	0.143028	1.254	0.000329824	cytoplasm	K02997	RP-S9e, RPS9; small subunit ribosomal protein S9e	map03010 Ribosome				PF01479	S4 domain	J	KOG3301	Ribosomal protein S4
A0A1U8FM01	MOSC domain-containing protein OS=Capsicum annuum OX=4072 GN=T459_06008 PE=4 SV=1	T459_06008	34.1	0.96	0.947	0.987	1.086	1.062	0.964	1.031	1.03	1.033	0.952	0.946	0.964	1.13	1.139	1.198	0.895	0.857	0.815	0.93	0.137382	1.081	0.000154729	1.351	0.000770978	chloroplast							PF03476; PF03473	MOSC N-terminal beta barrel domain; MOSC domain	S	KOG2362	Uncharacterized Fe-S protein
A0A1U8E2G8	Syntaxin-32 OS=Capsicum annuum OX=4072 GN=T459_21710 PE=3 SV=1	T459_21710	37.8	1.064	1.046	0.994	0.961	0.942	0.959	1.022	1.021	1.031	1.071	0.964	0.947	1.072	1.07	1.077	0.94	0.994	0.906	1.085	0.0195205	1.031	0.454584	1.133	0.00956435	Golgi apparatus	K08490	STX5; syntaxin 5	map04130 SNARE interactions in vesicular transport	GO:0006810 transport; GO:0006888 endoplasmic reticulum to Golgi vesicle-mediated transport; GO:0006906 vesicle fusion; GO:0006996 organelle organization; GO:0009987 cellular process; GO:0016043 cellular component organization; GO:0016050 vesicle organization; GO:0016192 vesicle-mediated transport; GO:0022406 membrane docking; GO:0046907 intracellular transport; GO:0048193 Golgi vesicle transport;…	GO:0000139 Golgi membrane; GO:0005622 intracellular; GO:0005623 cell; GO:0005737 cytoplasm; GO:0005794 Golgi apparatus; GO:0012505 endomembrane system; GO:0016020 membrane; GO:0016021 integral component of membrane; GO:0031090 organelle membrane; GO:0031201 SNARE complex; GO:0031224 intrinsic component of membrane; GO:0031984 organelle subcompartment; GO:0032991 protein-containing complex; GO:004…	GO:0000149 SNARE binding; GO:0005488 binding; GO:0005515 protein binding;			U	KOG0812	SNARE protein SED5/Syntaxin 5
A0A1U8HHJ0	nuclear pore complex protein NUP1 isoform X1(predicted) OS=Capsicum annuum OX=4072 GN=T459_19127 PE=4 SV=1	T459_19127	84.8	0.964	0.988	0.941	1.05	1.049	1.054	1.022	1.079	1.051	0.986	0.952	0.99							0.918	0.00365828	1.077	0.0211776			nucleus
A0A1U8GCJ3	AP-4 complex subunit mu OS=Capsicum annuum OX=4072 GN=T459_12792 PE=3 SV=1	T459_12792	50.6	1.034	1.022	1.048	0.94	0.977	0.962	1.028	0.994	0.981	0.997	1.007	0.984	1.124	1.08	1.036	0.936	0.946	0.943	1.078	0.00487324	1.005	0.769025	1.147	0.00453771	chloroplast	K12402	AP4M1; AP-4 complex subunit mu-1		GO:0006605 protein targeting; GO:0006810 transport; GO:0006886 intracellular protein transport; GO:0006892 post-Golgi vesicle-mediated transport; GO:0006895 Golgi to endosome transport; GO:0006896 Golgi to vacuole transport; GO:0007034 vacuolar transport; GO:0007041 lysosomal transport; GO:0008104 protein localization; GO:0015031 protein transport; GO:0015833 peptide transport; GO:0016192 vesicle…	GO:0005622 intracellular; GO:0005623 cell; GO:0005737 cytoplasm; GO:0005768 endosome; GO:0005769 early endosome; GO:0005794 Golgi apparatus; GO:0005802 trans-Golgi network; GO:0012505 endomembrane system; GO:0016020 membrane; GO:0030117 membrane coat; GO:0030119 AP-type membrane coat adaptor complex; GO:0030124 AP-4 adaptor complex; GO:0031410 cytoplasmic vesicle; GO:0031982 vesicle; GO:0031984 o…				U	KOG0937	Adaptor complexes medium subunit family
A0A2G2ZQS4	Protein CutA, chloroplastic OS=Capsicum annuum OX=4072 GN=T459_12754 PE=4 SV=1	T459_12754	13.2	0.956	0.855	0.862	1.05	1.156	1.128	1.049	0.819	0.81	1.156	1.125	1.046	1.36	0.948	1.165	0.932	0.894	0.716	0.802	0.00861616	0.805	0.067081	1.366	0.0812718	extracellular	K03926	cutA; periplasmic divalent cation tolerance protein		GO:0009987 cellular process; GO:0016043 cellular component organization; GO:0022607 cellular component assembly; GO:0043933 protein-containing complex subunit organization; GO:0044085 cellular component biogenesis; GO:0051259 protein complex oligomerization; GO:0051260 protein homooligomerization; GO:0065003 protein-containing complex assembly; GO:0070206 protein trimerization; GO:0070207 protein…	GO:0005622 intracellular; GO:0005623 cell; GO:0005737 cytoplasm; GO:0009507 chloroplast; GO:0009536 plastid; GO:0043226 organelle; GO:0043227 membrane-bounded organelle; GO:0043229 intracellular organelle; GO:0043231 intracellular membrane-bounded organelle;	GO:0005488 binding; GO:0005507 copper ion binding; GO:0043167 ion binding; GO:0043169 cation binding; GO:0046872 metal ion binding; GO:0046914 transition metal ion binding;	PF03091	CutA1 divalent ion tolerance protein	P	KOG3338	Divalent cation tolerance-related protein
A0A2G3A470	AAA domain-containing protein OS=Capsicum annuum OX=4072 GN=T459_04131 PE=3 SV=1	T459_04131	60.9	1.024	1.033	0.969	1.029	1.019	0.98	1.098	0.893	0.981	1	0.968	1.017	0.989	0.94	0.898	1.033	1.058	1.015	0.999	0.974831	0.996	0.905977	0.91	0.0354925	cytoplasm	K17681	ATAD3A_B; ATPase family AAA domain-containing protein 3A/B					PF00004	ATPase family associated with various cellular activities (AAA)	O	KOG0742	AAA+-type ATPase
A0A2G2YZA2	Knot1 domain-containing protein OS=Capsicum annuum OX=4072 GN=T459_18600 PE=4 SV=1	T459_18600	15	1.029	1.064	0.95	0.926	1.064	0.973	0.954	1.003	0.975	1.053	1.024	0.996	1.135	1.11	1.056	0.94	0.889	0.883	1.027	0.633511	0.954	0.0960052	1.217	0.00251369	chloroplast							PF00304	Gamma-thionin family
A0A1U8FKB4	HAUS-augmin3 domain-containing protein OS=Capsicum annuum OX=4072 GN=T459_18367 PE=4 SV=1	T459_18367	69.9	0.997	0.958	0.983	1.009	1.012	0.959	0.939	1.052	0.984	0.916	1.1	1.014	0.942	0.874	1.068	1.005	0.968	1.148	0.986	0.540801	0.982	0.803103	0.924	0.365069	nucleus	K16586	HAUS3; HAUS augmin-like complex subunit 3		GO:0000226 microtubule cytoskeleton organization; GO:0006996 organelle organization; GO:0007010 cytoskeleton organization; GO:0007017 microtubule-based process; GO:0007049 cell cycle; GO:0007051 spindle organization; GO:0009987 cellular process; GO:0016043 cellular component organization; GO:0022402 cell cycle process; GO:0022607 cellular component assembly; GO:0044085 cellular component biogenes…	GO:0005622 intracellular; GO:0005623 cell; GO:0005634 nucleus; GO:0005737 cytoplasm; GO:0005819 spindle; GO:0005856 cytoskeleton; GO:0009524 phragmoplast; GO:0015630 microtubule cytoskeleton; GO:0043226 organelle; GO:0043227 membrane-bounded organelle; GO:0043228 non-membrane-bounded organelle; GO:0043229 intracellular organelle; GO:0043231 intracellular membrane-bounded organelle; GO:0043232 int…
A0A1U8FZ82	Hexosyltransferase OS=Capsicum annuum OX=4072 GN=T459_09536 PE=3 SV=1	T459_09536	38.2	1.044	1.036	1.093	0.935	1.037	0.86	0.949	1.054	1.143	1.067	0.928	0.867	0.916	1.177	1.041	1.03	0.959	0.887	1.12	0.109221	1.099	0.305994	1.09	0.382797	chloroplast	K20854	HPGT, B3GALT9_10_11; hydroxyproline O-galactosyltransferase HPGT [EC:2.4.1.-]		GO:0006029 proteoglycan metabolic process; GO:0006464 cellular protein modification process; GO:0006486 protein glycosylation; GO:0006493 protein O-linked glycosylation; GO:0006807 nitrogen compound metabolic process; GO:0008152 metabolic process; GO:0009058 biosynthetic process; GO:0009059 macromolecule biosynthetic process; GO:0009100 glycoprotein metabolic process; GO:0009101 glycoprotein bios…	GO:0005622 intracellular; GO:0005623 cell; GO:0005737 cytoplasm; GO:0005768 endosome; GO:0005794 Golgi apparatus; GO:0005802 trans-Golgi network; GO:0012505 endomembrane system; GO:0031410 cytoplasmic vesicle; GO:0031982 vesicle; GO:0031984 organelle subcompartment; GO:0043226 organelle; GO:0043227 membrane-bounded organelle; GO:0043229 intracellular organelle; GO:0043231 intracellular membrane-b…	GO:0003824 catalytic activity; GO:0008378 galactosyltransferase activity; GO:0016740 transferase activity; GO:0016757 transferase activity, transferring glycosyl groups; GO:0016758 transferase activity, transferring hexosyl groups; GO:1990714 hydroxyproline O-galactosyltransferase activity;			G	KOG2288	Galactosyltransferases
A0A1U8FFI1	Nascent polypeptide-associated complex subunit alpha-like protein 3 OS=Capsicum annuum OX=4072 GN=T459_26407 PE=4 SV=1	T459_26407	21.6	0.935	0.95	0.874	1.084	1.086	1.09	1.014	1.045	1.078	0.952	0.971	0.988	1.152	1.075	1.12	0.894	0.902	0.808	0.846	0.00282361	1.078	0.0225938	1.285	0.00343798	nucleus	K03626	EGD2, NACA; nascent polypeptide-associated complex subunit alpha							K	KOG2239	Transcription factor containing NAC and TS-N domains
A0A1U8EV97	Carboxypeptidase OS=Capsicum annuum OX=4072 GN=T459_29444 PE=3 SV=1	T459_29444	56.2	1.015	1.039	1.048	0.955	0.955	0.977	0.986	0.991	0.985	1.022	1.023	0.985	0.998	1.008	1.028	0.97	0.985	1.002	1.074	0.00417492	0.978	0.148016	1.026	0.114681	chloroplast	K16298	SCPL-IV; serine carboxypeptidase-like clade IV [EC:3.4.16.-]		GO:0006508 proteolysis; GO:0006807 nitrogen compound metabolic process; GO:0008152 metabolic process; GO:0009056 catabolic process; GO:0009057 macromolecule catabolic process; GO:0009987 cellular process; GO:0019538 protein metabolic process; GO:0030163 protein catabolic process; GO:0043170 macromolecule metabolic process; GO:0044237 cellular metabolic process; GO:0044238 primary metabolic proces…	GO:0005576 extracellular region; GO:0005622 intracellular; GO:0005623 cell; GO:0005737 cytoplasm; GO:0005773 vacuole; GO:0005777 peroxisome; GO:0005783 endoplasmic reticulum; GO:0005789 endoplasmic reticulum membrane; GO:0005829 cytosol; GO:0012505 endomembrane system; GO:0016020 membrane; GO:0031984 organelle subcompartment; GO:0042175 nuclear outer membrane-endoplasmic reticulum membrane networ…	GO:0003824 catalytic activity; GO:0004180 carboxypeptidase activity; GO:0004185 serine-type carboxypeptidase activity; GO:0008233 peptidase activity; GO:0008236 serine-type peptidase activity; GO:0008238 exopeptidase activity; GO:0016787 hydrolase activity; GO:0017171 serine hydrolase activity; GO:0070008 serine-type exopeptidase activity; GO:0070011 peptidase activity, acting on L-amino acid pep…	PF00450	Serine carboxypeptidase	O	KOG1282	Serine carboxypeptidases (lysosomal cathepsin A)
A0A2G2Y1U7	putative transferase At1g60990, chloroplastic isoform X1(predicted) OS=Capsicum annuum OX=4072 GN=T459_32394 PE=4 SV=1	T459_32394	44.6	1.045	1.029	1.016	0.952	0.966	0.962	1.014	1.015	1.019	1.014	0.92	0.96	1.07	1.11	1.099	0.945	0.926	0.86	1.073	0.00158805	1.053	0.13533	1.201	0.00391503	chloroplast				GO:0006790 sulfur compound metabolic process; GO:0008152 metabolic process; GO:0009987 cellular process; GO:0016043 cellular component organization; GO:0016226 iron-sulfur cluster assembly; GO:0022607 cellular component assembly; GO:0031163 metallo-sulfur cluster assembly; GO:0044085 cellular component biogenesis; GO:0044237 cellular metabolic process; GO:0051186 cofactor metabolic process; GO:00…	GO:0005622 intracellular; GO:0005623 cell; GO:0005737 cytoplasm; GO:0005739 mitochondrion; GO:0009507 chloroplast; GO:0009536 plastid; GO:0043226 organelle; GO:0043227 membrane-bounded organelle; GO:0043229 intracellular organelle; GO:0043231 intracellular membrane-bounded organelle;	GO:0003824 catalytic activity; GO:0016491 oxidoreductase activity;	PF01571; PF08669	Aminomethyltransferase folate-binding domain; Glycine cleavage T-protein C-terminal barrel domain	E	KOG2770	Aminomethyl transferase
A0A2G2Z460	ATP-dependent zinc metalloprotease FTSH 8, chloroplastic OS=Capsicum annuum OX=4072 GN=T459_20256 PE=3 SV=1	T459_20256	70.7	0.994	0.975	0.998	0.997	1.034	1.012	1.002	0.984	0.98	1.026	1.009	1.007	1.132	1.1	1.114	0.886	0.881	0.89	0.975	0.119832	0.975	0.0487889	1.259	1.26379e-05	chloroplast	K03798	ftsH, hflB; cell division protease FtsH [EC:3.4.24.-]		GO:0006091 generation of precursor metabolites and energy; GO:0006508 proteolysis; GO:0006807 nitrogen compound metabolic process; GO:0006996 organelle organization; GO:0008152 metabolic process; GO:0009056 catabolic process; GO:0009057 macromolecule catabolic process; GO:0009314 response to radiation; GO:0009416 response to light stimulus; GO:0009628 response to abiotic stimulus; GO:0009642 resp…	GO:0005622 intracellular; GO:0005623 cell; GO:0005737 cytoplasm; GO:0009507 chloroplast; GO:0009526 plastid envelope; GO:0009534 chloroplast thylakoid; GO:0009535 chloroplast thylakoid membrane; GO:0009536 plastid; GO:0009579 thylakoid; GO:0009941 chloroplast envelope; GO:0016020 membrane; GO:0031967 organelle envelope; GO:0031975 envelope; GO:0031976 plastid thylakoid; GO:0031977 thylakoid lumen…	GO:0003824 catalytic activity; GO:0004176 ATP-dependent peptidase activity; GO:0008233 peptidase activity; GO:0008237 metallopeptidase activity; GO:0016462 pyrophosphatase activity; GO:0016787 hydrolase activity; GO:0016817 hydrolase activity, acting on acid anhydrides; GO:0016818 hydrolase activity, acting on acid anhydrides, in phosphorus-containing anhydrides; GO:0016887 ATPase activity; GO:00…	PF00004; PF01434	ATPase family associated with various cellular activities (AAA); Peptidase family M41	O	KOG0731	AAA+-type ATPase containing the peptidase M41 domain
A0A1U8F9C0	protein LSM14 homolog A-A-like isoform X2(predicted) OS=Capsicum annuum OX=4072 GN=T459_17615 PE=4 SV=1	T459_17615	70	0.905	0.97	0.949	1.057	1.031	1.076	1.018	0.982	0.985	1.047	1.011	0.965	0.982	0.904	0.819	1.118	1.104	1.08	0.893	0.00889272	0.987	0.666012	0.819	0.0194018	nucleus	K18749	LSM14, RAP55, SCD6; protein LSM14					PF12701; PF09532	Scd6-like Sm domain; FDF domain	U	KOG1073	Uncharacterized mRNA-associated protein RAP55
A0A2G2YMX9	Beta-fructofuranosidase, insoluble isoenzyme CWINV4 OS=Capsicum annuum OX=4072 GN=T459_26196 PE=3 SV=1	T459_26196	59.4	1.004	0.989	1.096	0.964	0.964	0.988	1.078	0.981	1.069	0.984	0.867	1.03	1.144	1.037	1.193	0.873	0.914	0.85	1.059	0.161696	1.086	0.232194	1.279	0.00625894	cytoplasm	K01193	INV, sacA; beta-fructofuranosidase [EC:3.2.1.26]	map00052 Galactose metabolism; map00500 Starch and sucrose metabolism; map01100 Metabolic pathways		GO:0005618 cell wall; GO:0005623 cell; GO:0030312 external encapsulating structure; GO:0071944 cell periphery;		PF00251; PF08244	Glycosyl hydrolases family 32 N-terminal domain; Glycosyl hydrolases family 32 C terminal	G	KOG0228	Beta-fructofuranosidase (invertase)
A0A2G3ANQ5	Putative plastid-lipid-associated protein 3, chloroplastic OS=Capsicum annuum OX=4072 GN=T459_03746 PE=4 SV=1	T459_03746	97.1	1.005	0.982	0.988	1.035	1.033	0.991	0.938	0.968	1.03	1.018	1.052	0.998	1.014	1.106	1.128	0.822	1.018	0.921	0.973	0.153986	0.957	0.23049	1.176	0.0774202	chloroplast
A0A1U8F839	Abscisic acid receptor PYL10 OS=Capsicum annuum OX=4072 GN=T459_30587 PE=4 SV=1	T459_30587	26.3	0.996	1.087	0.998	1.011	0.978	0.935	0.959	1.038	0.892	0.938	1.087	1.072	1.13	1.112	1.028	0.956	0.881	0.905	1.054	0.229109	0.933	0.341509	1.193	0.00968835	nucleus	K14496	PYL; abscisic acid receptor PYR/PYL family	map04016 MAPK signaling pathway - plant; map04075 Plant hormone signal transduction	GO:0001101 response to acid chemical; GO:0006950 response to stress; GO:0006970 response to osmotic stress; GO:0007154 cell communication; GO:0007165 signal transduction; GO:0007275 multicellular organism development; GO:0009266 response to temperature stimulus; GO:0009409 response to cold; GO:0009414 response to water deprivation; GO:0009415 response to water; GO:0009628 response to abiotic stim…	GO:0005622 intracellular; GO:0005623 cell; GO:0005634 nucleus; GO:0005737 cytoplasm; GO:0005829 cytosol; GO:0043226 organelle; GO:0043227 membrane-bounded organelle; GO:0043229 intracellular organelle; GO:0043231 intracellular membrane-bounded organelle;	GO:0005488 binding; GO:0008289 lipid binding; GO:0010427 abscisic acid binding; GO:0019840 isoprenoid binding; GO:0031406 carboxylic acid binding; GO:0033293 monocarboxylic acid binding; GO:0036094 small molecule binding; GO:0042562 hormone binding; GO:0043167 ion binding; GO:0043168 anion binding; GO:0043177 organic acid binding; GO:0043178 alcohol binding;
A0A1U8EW32	lipase-like(predicted) OS=Capsicum annuum OX=4072 GN=T459_27781 PE=4 SV=1	T459_27781	52.7	1.168	0.996	0.949	0.977	0.961	1.029	0.99	0.97	0.958	1.017	1.033	1.051	0.871	0.978	0.881	1.07	1.061	1.145	1.049	0.537541	0.941	0.0107415	0.833	0.0141843	cytoplasm
A0A1U8EWT3	Putative cinnamyl alcohol dehydrogenase 1 OS=Capsicum annuum OX=4072 GN=T459_30690 PE=3 SV=1	T459_30690	38.5	0.978	0.964	1.001	1.018	1	1.012	0.97	1.009	1	1.015	1.023	1.006	1.026	1.032	1.074	0.954	0.958	0.954	0.971	0.0741017	0.979	0.16713	1.093	0.00357975	chloroplast	K00083	CAD; cinnamyl-alcohol dehydrogenase [EC:1.1.1.195]	map00940 Phenylpropanoid biosynthesis; map01100 Metabolic pathways; map01110 Biosynthesis of secondary metabolites				PF08240	Alcohol dehydrogenase GroES-like domain	Q	KOG1603	Copper chaperone
A0A2G2YQ49	DnaJ protein P58IPK-like protein OS=Capsicum annuum OX=4072 GN=T459_22658 PE=4 SV=1	T459_22658	40.8	0.984	0.964	0.961	1.026	1.031	1.041	1.073	1.018	1.028	0.975	0.872	0.988	1.033	0.986	1.01	0.976	0.987	1.016	0.939	0.0018156	1.1	0.0865039	1.017	0.408379	cytoplasm	K09523	DNAJC3; DnaJ homolog subfamily C member 3	map04141 Protein processing in endoplasmic reticulum	GO:0035821 modulation of process of other organism; GO:0043900 regulation of multi-organism process; GO:0043902 positive regulation of multi-organism process; GO:0043903 regulation of interspecies interactions between organisms; GO:0044403 symbiotic process; GO:0044419 interspecies interaction between organisms; GO:0044788 modulation by host of viral process; GO:0044794 positive regulation by hos…	GO:0005622 intracellular; GO:0005623 cell; GO:0005737 cytoplasm; GO:0005783 endoplasmic reticulum; GO:0005788 endoplasmic reticulum lumen; GO:0005886 plasma membrane; GO:0012505 endomembrane system; GO:0016020 membrane; GO:0031974 membrane-enclosed lumen; GO:0043226 organelle; GO:0043227 membrane-bounded organelle; GO:0043229 intracellular organelle; GO:0043231 intracellular membrane-bounded orga…		PF00226	DnaJ domain	O	KOG0550	Molecular chaperone (DnaJ superfamily)
A0A2G2YF02	nuclear speckle splicing regulatory protein 1 isoform X2(predicted) OS=Capsicum annuum OX=4072 GN=T459_27815 PE=4 SV=1	T459_27815	91.7	1	1.018	1.022	0.998	0.982	0.95	1.083	1.13	1.099	0.904	0.895	0.916	1.088	1.082	1.058	0.936	0.939	0.909	1.038	0.0814145	1.22	0.0001495	1.159	0.000383104	nucleus	K20892	RAY1; beta-arabinofuranosyltransferase [EC:2.4.2.-]
A0A1U8GHK4	Pyrophosphate--fructose 6-phosphate 1-phosphotransferase subunit alpha OS=Capsicum annuum OX=4072 GN=PFP-ALPHA PE=3 SV=1	PFP-ALPHA	67.5	0.94	0.962	0.976	1.046	1.042	1.04	1.002	0.97	0.99	0.994	1.039	1.043	0.965	0.959	0.981	1.056	1.02	1.059	0.92	0.00166414	0.963	0.106411	0.927	0.0053201	cytoplasm	K00895	pfp, PFP; diphosphate-dependent phosphofructokinase [EC:2.7.1.90]	map00010 Glycolysis / Gluconeogenesis; map00030 Pentose phosphate pathway; map00051 Fructose and mannose metabolism; map01100 Metabolic pathways; map01110 Biosynthesis of secondary metabolites	GO:0005975 carbohydrate metabolic process; GO:0006793 phosphorus metabolic process; GO:0006796 phosphate-containing compound metabolic process; GO:0008152 metabolic process; GO:0009743 response to carbohydrate; GO:0009744 response to sucrose; GO:0009746 response to hexose; GO:0009749 response to glucose; GO:0009750 response to fructose; GO:0009987 cellular process; GO:0010033 response to organic …	GO:0005622 intracellular; GO:0005623 cell; GO:0005737 cytoplasm; GO:0005829 cytosol;	GO:0003824 catalytic activity; GO:0008443 phosphofructokinase activity; GO:0016301 kinase activity; GO:0016740 transferase activity; GO:0016772 transferase activity, transferring phosphorus-containing groups; GO:0016773 phosphotransferase activity, alcohol group as acceptor; GO:0019200 carbohydrate kinase activity; GO:0047334 diphosphate-fructose-6-phosphate 1-phosphotransferase activity;	PF00365	Phosphofructokinase	F	KOG2440	Pyrophosphate-dependent phosphofructo-1-kinase
A0A2G2Y9P0	Metallophos domain-containing protein OS=Capsicum annuum OX=4072 GN=T459_30696 PE=4 SV=1	T459_30696	60.1	1.121	1.06	1.052	0.938	0.926	0.91	0.985	0.896	1.089	1.082	0.926	1.005	0.992	1.062	1.002	1.016	1.004	0.932	1.165	0.00220932	0.986	0.83994	1.035	0.36737	plasma membrane	K23362	MPPE1, PGAP5; ethanolamine phosphate phosphodiesterase [EC:3.1.-.-]		GO:0006139 nucleobase-containing compound metabolic process; GO:0006259 DNA metabolic process; GO:0006281 DNA repair; GO:0006464 cellular protein modification process; GO:0006497 protein lipidation; GO:0006505 GPI anchor metabolic process; GO:0006506 GPI anchor biosynthetic process; GO:0006629 lipid metabolic process; GO:0006643 membrane lipid metabolic process; GO:0006644 phospholipid metabolic …	GO:0005622 intracellular; GO:0005623 cell; GO:0005737 cytoplasm; GO:0005783 endoplasmic reticulum; GO:0012505 endomembrane system; GO:0016020 membrane; GO:0043226 organelle; GO:0043227 membrane-bounded organelle; GO:0043229 intracellular organelle; GO:0043231 intracellular membrane-bounded organelle;		PF00149	Calcineurin-like phosphoesterase	L	KOG3662	Cell division control protein/predicted DNA repair exonuclease
A0A2G2ZNL2	dNK domain-containing protein OS=Capsicum annuum OX=4072 GN=T459_12022 PE=4 SV=1	T459_12022	65	1.112	0.966	1.112	0.94	1.01	0.866													1.133	0.126286					chloroplast				GO:0006139 nucleobase-containing compound metabolic process; GO:0006213 pyrimidine nucleoside metabolic process; GO:0006220 pyrimidine nucleotide metabolic process; GO:0006725 cellular aromatic compound metabolic process; GO:0006753 nucleoside phosphate metabolic process; GO:0006793 phosphorus metabolic process; GO:0006796 phosphate-containing compound metabolic process; GO:0006807 nitrogen compo…	GO:0005622 intracellular; GO:0005623 cell; GO:0005634 nucleus; GO:0005737 cytoplasm; GO:0005829 cytosol; GO:0043226 organelle; GO:0043227 membrane-bounded organelle; GO:0043229 intracellular organelle; GO:0043231 intracellular membrane-bounded organelle;	GO:0003824 catalytic activity; GO:0004137 deoxycytidine kinase activity; GO:0005488 binding; GO:0005515 protein binding; GO:0008144 drug binding; GO:0016301 kinase activity; GO:0016740 transferase activity; GO:0016772 transferase activity, transferring phosphorus-containing groups; GO:0019136 deoxynucleoside kinase activity; GO:0019205 nucleobase-containing compound kinase activity; GO:0019206 nu…	PF01712	Deoxynucleoside kinase	F	KOG4235	Mitochondrial thymidine kinase 2/deoxyguanosine kinase
A0A1U8EC90	Magnesium-protoporphyrin IX monomethyl ester [oxidative] cyclase, chloroplastic OS=Capsicum annuum OX=4072 GN=T459_32698 PE=3 SV=1	T459_32698	46.6	1.046	1.15	1.159	0.873	0.875	0.889	0.895	0.985	1.493	0.742	1.169	0.721	1.002	0.986	0.989	1.022	1.004	1.004	1.272	0.0020085	1.282	0.32594	0.983	0.084137	chloroplast	K04035	E1.14.13.81, acsF, chlE; magnesium-protoporphyrin IX monomethyl ester (oxidative) cyclase [EC:1.14.13.81]	map00860 Porphyrin and chlorophyll metabolism; map01100 Metabolic pathways; map01110 Biosynthesis of secondary metabolites	GO:0006725 cellular aromatic compound metabolic process; GO:0006778 porphyrin-containing compound metabolic process; GO:0006779 porphyrin-containing compound biosynthetic process; GO:0006807 nitrogen compound metabolic process; GO:0006996 organelle organization; GO:0008152 metabolic process; GO:0009058 biosynthetic process; GO:0009657 plastid organization; GO:0009658 chloroplast organization; GO:…	GO:0005622 intracellular; GO:0005623 cell; GO:0005737 cytoplasm; GO:0009507 chloroplast; GO:0009526 plastid envelope; GO:0009528 plastid inner membrane; GO:0009534 chloroplast thylakoid; GO:0009535 chloroplast thylakoid membrane; GO:0009536 plastid; GO:0009579 thylakoid; GO:0009706 chloroplast inner membrane; GO:0009941 chloroplast envelope; GO:0016020 membrane; GO:0019866 organelle inner membran…	GO:0003676 nucleic acid binding; GO:0003677 DNA binding; GO:0003824 catalytic activity; GO:0004497 monooxygenase activity; GO:0005488 binding; GO:0016491 oxidoreductase activity; GO:0016705 oxidoreductase activity, acting on paired donors, with incorporation or reduction of molecular oxygen; GO:0016709 oxidoreductase activity, acting on paired donors, with incorporation or reduction of molecular …	PF02915	Rubrerythrin
A0A1U8G399	2-hydroxyisoflavanone dehydratase OS=Capsicum annuum OX=4072 GN=T459_08128 PE=4 SV=1	T459_08128	35.4	1.008	1.01	1.01	1.01	0.996	0.987	0.998	1	1.02	1.013	1.009	0.963	1.063	1.098	1.107	0.938	0.892	0.905	1.012	0.15801	1.011	0.560544	1.195	0.000783101	nucleus	K13258	HIDH; 2-hydroxyisoflavanone dehydratase [EC:4.2.1.105]	map00943 Isoflavonoid biosynthesis; map01100 Metabolic pathways; map01110 Biosynthesis of secondary metabolites	GO:0006725 cellular aromatic compound metabolic process; GO:0008152 metabolic process; GO:0009056 catabolic process; GO:0009058 biosynthetic process; GO:0009698 phenylpropanoid metabolic process; GO:0009699 phenylpropanoid biosynthetic process; GO:0009717 isoflavonoid biosynthetic process; GO:0009987 cellular process; GO:0018130 heterocycle biosynthetic process; GO:0019438 aromatic compound biosy…		GO:0003824 catalytic activity; GO:0016787 hydrolase activity; GO:0016788 hydrolase activity, acting on ester bonds; GO:0016829 lyase activity; GO:0016835 carbon-oxygen lyase activity; GO:0016836 hydro-lyase activity; GO:0033987 2-hydroxyisoflavanone dehydratase activity; GO:0052689 carboxylic ester hydrolase activity;	PF07859	alpha/beta hydrolase fold	V	KOG1515	Arylacetamide deacetylase
A0A2G3A5A5	Cytochrome 86B1 OS=Capsicum annuum OX=4072 GN=T459_04484 PE=3 SV=1	T459_04484	64.4	0.997	0.969	0.989	1.018	1.025	1.037	1.021	1.051	0.959	1.007	0.96	1.009							0.959	0.0145338	1.018	0.601844			chloroplast	K15402	CYP86B1; fatty acid omega-hydroxylase [EC:1.14.-.-]	map00073 Cutin, suberine and wax biosynthesis	GO:0000038 very long-chain fatty acid metabolic process; GO:0006082 organic acid metabolic process; GO:0006629 lipid metabolic process; GO:0006631 fatty acid metabolic process; GO:0006633 fatty acid biosynthetic process; GO:0006725 cellular aromatic compound metabolic process; GO:0008152 metabolic process; GO:0008610 lipid biosynthetic process; GO:0009058 biosynthetic process; GO:0009698 phenylpr…	GO:0005622 intracellular; GO:0005623 cell; GO:0005737 cytoplasm; GO:0005783 endoplasmic reticulum; GO:0012505 endomembrane system; GO:0043226 organelle; GO:0043227 membrane-bounded organelle; GO:0043229 intracellular organelle; GO:0043231 intracellular membrane-bounded organelle;		PF00067	Cytochrome P450	Q	KOG0157	Cytochrome P450 CYP4/CYP19/CYP26 subfamilies
A0A2G3AA70	Protein ELF4-LIKE 2 OS=Capsicum annuum OX=4072 GN=T459_06259 PE=4 SV=1	T459_06259	12.7	0.96	0.985	1.101	0.967	1.038	0.954													1.029	0.60359					nucleus							PF07011	Protein of unknown function (DUF1313)
A0A2G2Z3M4	pentatricopeptide repeat-containing protein At2g20710, mitochondrial isoform X1(predicted) OS=Capsicum annuum OX=4072 GN=T459_20149 PE=4 SV=1	T459_20149	44.8	1.045	1.03	1.026	1.027	0.976	0.902	0.875	0.806	0.821	1.147	1.201	1.151	0.826	0.912	0.748	1.15	1.178	1.113	1.067	0.155526	0.715	0.000315511	0.722	0.00529289	cytoplasm				GO:0006139 nucleobase-containing compound metabolic process; GO:0006725 cellular aromatic compound metabolic process; GO:0006807 nitrogen compound metabolic process; GO:0008152 metabolic process; GO:0009451 RNA modification; GO:0009987 cellular process; GO:0016070 RNA metabolic process; GO:0034641 cellular nitrogen compound metabolic process; GO:0043170 macromolecule metabolic process; GO:0043412…	GO:0005622 intracellular; GO:0005623 cell; GO:0043226 organelle; GO:0043227 membrane-bounded organelle; GO:0043229 intracellular organelle; GO:0043231 intracellular membrane-bounded organelle;	GO:0003676 nucleic acid binding; GO:0003723 RNA binding; GO:0003824 catalytic activity; GO:0004518 nuclease activity; GO:0004519 endonuclease activity; GO:0005488 binding; GO:0016787 hydrolase activity; GO:0016788 hydrolase activity, acting on ester bonds; GO:0097159 organic cyclic compound binding; GO:1901363 heterocyclic compound binding;			S	KOG4197	FOG: PPR repeat
A0A1U8FWN9	Glucan endo-1,3-beta-glucosidase, basic vacuolar isoform OS=Capsicum annuum OX=4072 GN=T459_10460 PE=3 SV=1	T459_10460	40.6							0.973	1.052	1.346	0.966	0.813	0.858	1.034	1.086	1.092	0.938	0.906	0.946			1.278	0.0966437	1.151	0.0029684	chloroplast				GO:0000272 polysaccharide catabolic process; GO:0002215 defense response to nematode; GO:0002376 immune system process; GO:0005975 carbohydrate metabolic process; GO:0005976 polysaccharide metabolic process; GO:0006073 cellular glucan metabolic process; GO:0006074 (1->3)-beta-D-glucan metabolic process; GO:0006076 (1->3)-beta-D-glucan catabolic process; GO:0006950 response to stress; GO:0006952 d…	GO:0005618 cell wall; GO:0005622 intracellular; GO:0005623 cell; GO:0005737 cytoplasm; GO:0005773 vacuole; GO:0005774 vacuolar membrane; GO:0005886 plasma membrane; GO:0016020 membrane; GO:0030312 external encapsulating structure; GO:0031090 organelle membrane; GO:0031224 intrinsic component of membrane; GO:0031225 anchored component of membrane; GO:0031226 intrinsic component of plasma membrane;…	GO:0003824 catalytic activity; GO:0004553 hydrolase activity, hydrolyzing O-glycosyl compounds; GO:0005488 binding; GO:0008422 beta-glucosidase activity; GO:0015926 glucosidase activity; GO:0016787 hydrolase activity; GO:0016798 hydrolase activity, acting on glycosyl bonds; GO:0030246 carbohydrate binding; GO:0030247 polysaccharide binding; GO:0042973 glucan endo-1,3-beta-D-glucosidase activity;	PF00332	Glycosyl hydrolases family 17
A0A2G2ZF66	Mg-protoporphyrin IX chelatase OS=Capsicum annuum OX=4072 GN=T459_13655 PE=3 SV=1	T459_13655	83.9	1.099	1.032	1.036	0.941	0.986	0.889	1.124	1.02	0.958	0.988	0.947	0.972	0.99	0.97	1.013	1.084	1.038	0.914	1.125	0.0311487	1.067	0.260999	0.979	0.742722	chloroplast	K03404	chlD, bchD; magnesium chelatase subunit D [EC:6.6.1.1]	map00860 Porphyrin and chlorophyll metabolism; map01100 Metabolic pathways; map01110 Biosynthesis of secondary metabolites		GO:0005622 intracellular; GO:0005623 cell; GO:0005737 cytoplasm; GO:0009507 chloroplast; GO:0009532 plastid stroma; GO:0009534 chloroplast thylakoid; GO:0009536 plastid; GO:0009570 chloroplast stroma; GO:0009579 thylakoid; GO:0010007 magnesium chelatase complex; GO:0031976 plastid thylakoid; GO:0031984 organelle subcompartment; GO:0032991 protein-containing complex; GO:0043226 organelle; GO:00432…		PF01078; PF13519	Magnesium chelatase, subunit ChlI; von Willebrand factor type A domain
A0A1U8EDM0	DNA damage-inducible protein 1(predicted) OS=Capsicum annuum OX=4072 GN=T459_24649 PE=4 SV=1	T459_24649	44.9	0.953	0.95	0.949	1.031	1.035	1.047	1.04	1.042	1.043	0.979	0.988	0.944	1.114	1.092	1.014	0.934	0.946	0.936	0.916	5.29096e-05	1.074	0.00696867	1.143	0.00992592	cytoplasm	K11885	DDI1; DNA damage-inducible protein 1					PF00240; PF00627	Ubiquitin family; UBA/TS-N domain	L	KOG0012	DNA damage inducible protein
A0A2G2YC10	Putative lipid phosphate phosphatase 3, chloroplastic OS=Capsicum annuum OX=4072 GN=T459_26775 PE=4 SV=1	T459_26775	36.7	1.001	0.984	0.982	1.027	0.97	1.03	0.873	0.897	0.978	1.017	1.049	1.188	0.903	0.998	1.029	0.87	0.945	1.259	0.98	0.390643	0.844	0.0455693	0.953	0.773002	endoplasmic reticulum	K18693	DPP1, DPPL, PLPP4_5; diacylglycerol diphosphate phosphatase / phosphatidate phosphatase [EC:3.1.3.81 3.1.3.4]	map00561 Glycerolipid metabolism; map00564 Glycerophospholipid metabolism; map01110 Biosynthesis of secondary metabolites	GO:0006793 phosphorus metabolic process; GO:0006796 phosphate-containing compound metabolic process; GO:0008152 metabolic process; GO:0009987 cellular process; GO:0016311 dephosphorylation; GO:0044237 cellular metabolic process;	GO:0005623 cell; GO:0005886 plasma membrane; GO:0005887 integral component of plasma membrane; GO:0016020 membrane; GO:0016021 integral component of membrane; GO:0031224 intrinsic component of membrane; GO:0031226 intrinsic component of plasma membrane; GO:0071944 cell periphery;	GO:0003824 catalytic activity; GO:0003993 acid phosphatase activity; GO:0008195 phosphatidate phosphatase activity; GO:0016787 hydrolase activity; GO:0016788 hydrolase activity, acting on ester bonds; GO:0016791 phosphatase activity; GO:0042578 phosphoric ester hydrolase activity;			I	KOG3030	Lipid phosphate phosphatase and related enzymes of the PAP2 family
Q9SEG8	Agamous-like MADS-box protein AGL3 OS=Capsicum annuum OX=4072 GN=MADS1 PE=2 SV=1	MADS1	28.2	1.112	1.06	1.07	0.86	0.949	0.954													1.173	0.011954					nucleus	K09264	K09264; MADS-box transcription factor, plant					PF00319	SRF-type transcription factor (DNA-binding and dimerisation domain)	K	KOG0014	MADS box transcription factor
K4FZR6	Succinate--CoA ligase [ADP-forming] subunit alpha, mitochondrial OS=Capsicum annuum OX=4072 GN=SCS PE=2 SV=1	SCS	34.2	0.925	0.919	0.935	1.09	1.088	1.04	1.031	1.025	1.01	0.98	1	0.988	1.039	1.102	0.989	0.956	0.98	0.9	0.864	0.000821291	1.033	0.0186222	1.104	0.0708914	chloroplast	K01899	LSC1; succinyl-CoA synthetase alpha subunit [EC:6.2.1.4 6.2.1.5]	map00020 Citrate cycle (TCA cycle); map00640 Propanoate metabolism; map01100 Metabolic pathways; map01110 Biosynthesis of secondary metabolites; map01200 Carbon metabolism	GO:0006082 organic acid metabolic process; GO:0006091 generation of precursor metabolites and energy; GO:0006099 tricarboxylic acid cycle; GO:0006101 citrate metabolic process; GO:0006104 succinyl-CoA metabolic process; GO:0006105 succinate metabolic process; GO:0006139 nucleobase-containing compound metabolic process; GO:0006163 purine nucleotide metabolic process; GO:0006637 acyl-CoA metabolic …	GO:0005618 cell wall; GO:0005622 intracellular; GO:0005623 cell; GO:0005737 cytoplasm; GO:0005739 mitochondrion; GO:0005759 mitochondrial matrix; GO:0030312 external encapsulating structure; GO:0031974 membrane-enclosed lumen; GO:0043226 organelle; GO:0043227 membrane-bounded organelle; GO:0043229 intracellular organelle; GO:0043231 intracellular membrane-bounded organelle; GO:0043233 organelle l…	GO:0003824 catalytic activity; GO:0004774 succinate-CoA ligase activity; GO:0004775 succinate-CoA ligase (ADP-forming) activity; GO:0004776 succinate-CoA ligase (GDP-forming) activity; GO:0005488 binding; GO:0005507 copper ion binding; GO:0016874 ligase activity; GO:0016877 ligase activity, forming carbon-sulfur bonds; GO:0016878 acid-thiol ligase activity; GO:0043167 ion binding; GO:0043169 cati…	PF02629; PF00549	CoA binding domain; CoA-ligase	C	KOG1255	Succinyl-CoA synthetase, alpha subunit
E3UT59	AGAMOUS-LIKE1 OS=Capsicum annuum OX=4072 GN=AGL1 PE=2 SV=1	AGL1	29.3	0.923	1.06	0.999	0.899	1.09	1.033	0.97	1.171	0.983	0.918	0.971	0.995	0.877	0.818	0.995	0.966	1.081	1.264	0.987	0.875633	1.083	0.304347	0.812	0.101627	nucleus	K09264	K09264; MADS-box transcription factor, plant		GO:0000003 reproduction; GO:0003002 regionalization; GO:0003006 developmental process involved in reproduction; GO:0006355 regulation of transcription, DNA-templated; GO:0007275 multicellular organism development; GO:0007389 pattern specification process; GO:0009653 anatomical structure morphogenesis; GO:0009791 post-embryonic development; GO:0009889 regulation of biosynthetic process; GO:0009908…	GO:0005622 intracellular; GO:0005623 cell; GO:0005634 nucleus; GO:0043226 organelle; GO:0043227 membrane-bounded organelle; GO:0043229 intracellular organelle; GO:0043231 intracellular membrane-bounded organelle;	GO:0003700 DNA-binding transcription factor activity; GO:0140110 transcription regulator activity;	PF00319	SRF-type transcription factor (DNA-binding and dimerisation domain)	K	KOG0014	MADS box transcription factor
B9VRK7	Chitinase OS=Capsicum annuum OX=4072 GN=T459_33510 PE=2 SV=1	T459_33510	34.6	1.075	1.213	1.013	0.947	0.849	0.91	1.107	1.105	1.13	0.918	0.896	0.854	1.258	1.327	1.215	0.762	0.788	0.691	1.22	0.03345	1.253	0.000547622	1.696	0.000355457	extracellular	K20547	CHIB; basic endochitinase B [EC:3.2.1.14]	map00520 Amino sugar and nucleotide sugar metabolism; map01100 Metabolic pathways; map04016 MAPK signaling pathway - plant				PF00187; PF00182	Chitin recognition protein; Chitinase class I	O	KOG4742	Predicted chitinase
B5LAT5	Dihydrolipoamide acetyltransferase component of pyruvate dehydrogenase complex OS=Capsicum annuum OX=4072 GN=T459_02338 PE=2 SV=1	T459_02338	55	0.976	0.977	0.974	1.024	1.058	1.024	0.98	0.932	0.922	1.07	1.054	1.076	0.967	0.995	0.986	0.983	1.039	1.016	0.942	0.00560889	0.886	0.00353444	0.97	0.17521	chloroplast	K09699	DBT, bkdB; 2-oxoisovalerate dehydrogenase E2 component (dihydrolipoyl transacylase) [EC:2.3.1.168]	map00280 Valine, leucine and isoleucine degradation; map00640 Propanoate metabolism; map01100 Metabolic pathways; map01110 Biosynthesis of secondary metabolites	GO:0006950 response to stress; GO:0007154 cell communication; GO:0009267 cellular response to starvation; GO:0009314 response to radiation; GO:0009416 response to light stimulus; GO:0009605 response to external stimulus; GO:0009628 response to abiotic stimulus; GO:0009642 response to light intensity; GO:0009646 response to absence of light; GO:0009743 response to carbohydrate; GO:0009744 response…	GO:0005622 intracellular; GO:0005623 cell; GO:0005737 cytoplasm; GO:0005739 mitochondrion; GO:0005759 mitochondrial matrix; GO:0005947 mitochondrial alpha-ketoglutarate dehydrogenase complex; GO:0009295 nucleoid; GO:0030062 mitochondrial tricarboxylic acid cycle enzyme complex; GO:0031974 membrane-enclosed lumen; GO:0032991 protein-containing complex; GO:0042645 mitochondrial nucleoid; GO:0043226…	GO:0003824 catalytic activity; GO:0004147 dihydrolipoamide branched chain acyltransferase activity; GO:0005488 binding; GO:0005515 protein binding; GO:0008270 zinc ion binding; GO:0016407 acetyltransferase activity; GO:0016417 S-acyltransferase activity; GO:0016740 transferase activity; GO:0016746 transferase activity, transferring acyl groups; GO:0016747 transferase activity, transferring acyl g…	PF00364; PF00198	Biotin-requiring enzyme; 2-oxoacid dehydrogenases acyltransferase (catalytic domain)	I	KOG0558	Dihydrolipoamide transacylase (alpha-keto acid dehydrogenase E2 subunit)
E3UT60	AGAMOUS-LIKE2 OS=Capsicum annuum OX=4072 GN=AGL2 PE=2 SV=1	AGL2	28.6	0.886	1.015	0.888	1.064	1.191	0.963	0.892	0.972	0.889	1.028	1.057	1.166	0.918	0.911	0.979	1.124	0.982	1.092	0.867	0.136693	0.847	0.0261805	0.878	0.0516934	nucleus	K09264	K09264; MADS-box transcription factor, plant		GO:0000003 reproduction; GO:0003002 regionalization; GO:0003006 developmental process involved in reproduction; GO:0007275 multicellular organism development; GO:0007389 pattern specification process; GO:0009653 anatomical structure morphogenesis; GO:0009791 post-embryonic development; GO:0009908 flower development; GO:0010093 specification of floral organ identity; GO:0010097 specification of st…	GO:0005622 intracellular; GO:0005623 cell; GO:0005634 nucleus; GO:0043226 organelle; GO:0043227 membrane-bounded organelle; GO:0043229 intracellular organelle; GO:0043231 intracellular membrane-bounded organelle;		PF00319	SRF-type transcription factor (DNA-binding and dimerisation domain)	K	KOG0014	MADS box transcription factor
A0A1U8F749	Ubiquitin-40S ribosomal protein S27a OS=Capsicum annuum OX=4072 GN=T459_31412 PE=4 SV=1	T459_31412	17.7	0.972	0.968	0.978	1.01	1.053	1.032	0.995	0.963	1.002	1.002	0.983	1.045	0.886	0.878	0.936	1.124	1.12	1.118	0.943	0.00905646	0.977	0.347611	0.803	0.00039381	cytoplasm,nucleus	K02977	RP-S27Ae, RPS27A; small subunit ribosomal protein S27Ae	map03010 Ribosome				PF00240; PF01599	Ubiquitin family; Ribosomal protein S27a	J	KOG0004	Ubiquitin/40S ribosomal protein S27a fusion
B7S5L0	Peptide-methionine (R)-S-oxide reductase OS=Capsicum annuum OX=4072 GN=MsrB1 PE=2 SV=1	MsrB1	20.3	0.944	0.993	0.928	1.066	1.026	1.055	1.054	1.026	1.03	1.046	0.931	0.94	1.01	1.006	0.95	1.055	0.998	0.994	0.91	0.0156153	1.066	0.162511	0.973	0.383708	chloroplast	K07305	msrB; peptide-methionine (R)-S-oxide reductase [EC:1.8.4.12]							O	KOG0856	Predicted pilin-like transcription factor
F2X8C7	Glyoxal oxidase-related protein OS=Capsicum annuum OX=4072 GN=T459_09426 PE=2 SV=1	T459_09426	62.7	0.796	0.774	0.798	1.212	1.208	1.204	0.988	0.983	0.966	1.016	1.039	1.038							0.653	1.80165e-06	0.95	0.00661866			chloroplast							PF09118	Domain of unknown function (DUF1929)
B5LAS6	Acetyl-coenzyme A carboxylase carboxyl transferase subunit alpha OS=Capsicum annuum OX=4072 GN=T459_23141 PE=2 SV=1	T459_23141	84.5	0.988	0.948	0.933	1.048	1.032	1.03	0.982	0.953	0.98	1.026	1.04	1.018	0.932	0.916	0.92	1.083	1.068	1.114	0.923	0.0107043	0.945	0.00804177	0.848	0.000253501	chloroplast	K01962	accA; acetyl-CoA carboxylase carboxyl transferase subunit alpha [EC:6.4.1.2 2.1.3.15]	map00061 Fatty acid biosynthesis; map00620 Pyruvate metabolism; map00640 Propanoate metabolism; map01100 Metabolic pathways; map01110 Biosynthesis of secondary metabolites; map01200 Carbon metabolism; map01212 Fatty acid metabolism		GO:0005622 intracellular; GO:0005623 cell; GO:0005737 cytoplasm; GO:0009507 chloroplast; GO:0009526 plastid envelope; GO:0009532 plastid stroma; GO:0009536 plastid; GO:0009570 chloroplast stroma; GO:0009941 chloroplast envelope; GO:0016020 membrane; GO:0031967 organelle envelope; GO:0031975 envelope; GO:0043226 organelle; GO:0043227 membrane-bounded organelle; GO:0043229 intracellular organelle; …
E7CBE9	Floral homeotic protein GLOBOSA OS=Capsicum annuum OX=4072 GN=T459_16853 PE=2 SV=1	T459_16853	25.1	0.941	0.947	0.959	1.007	1.073	1.084													0.9	0.0114115					nucleus	K09264	K09264; MADS-box transcription factor, plant		GO:0000003 reproduction; GO:0003002 regionalization; GO:0003006 developmental process involved in reproduction; GO:0007275 multicellular organism development; GO:0007389 pattern specification process; GO:0009653 anatomical structure morphogenesis; GO:0009791 post-embryonic development; GO:0009908 flower development; GO:0010093 specification of floral organ identity; GO:0010097 specification of st…			PF00319	SRF-type transcription factor (DNA-binding and dimerisation domain)	K	KOG0014	MADS box transcription factor
B6C6Q9	Nascent polypeptide-associated complex subunit beta OS=Capsicum annuum OX=4072 GN=T459_19229 PE=2 SV=1	T459_19229	17.7	0.961	1.017	0.956	0.996	1.059	1.017	1.137	1.119	1.115	0.889	0.847	0.868	0.934	1.174	1.114	0.924	0.912	0.952	0.955	0.160594	1.295	7.04317e-05	1.156	0.117062	cytoplasm	K01527	EGD1, BTF3; nascent polypeptide-associated complex subunit beta		GO:0006950 response to stress; GO:0006970 response to osmotic stress; GO:0009628 response to abiotic stimulus; GO:0009651 response to salt stress; GO:0050896 response to stimulus;					K	KOG2240	RNA polymerase II general transcription factor BTF3 and related proteins
A0A0G2RJN8	Oligopeptidase B OS=Capsicum annuum OX=4072 GN=OPB PE=2 SV=1	OPB	80.7	1.02	1.084	1.053	0.931	0.955	0.946	0.972	0.952	0.994	1.036	1.033	1.005	0.913	0.934	0.977	1.048	1.047	1.068	1.115	0.00473899	0.949	0.0298243	0.893	0.00556797	chloroplast	K01354	ptrB; oligopeptidase B [EC:3.4.21.83]					PF02897; PF00326	Prolyl oligopeptidase, N-terminal beta-propeller domain; Prolyl oligopeptidase family	O	KOG2237	Predicted serine protease
A0A075B8I5	ABA-responsive protein 1 OS=Capsicum annuum OX=4072 GN=ABR1 PE=2 SV=1	ABR1	31.7	0.923	0.927	0.926	1.099	1.133	1.052	1.039	1.094	1.072	0.946	0.921	0.906	1.232	1.084	1.112	0.886	0.827	0.873	0.845	0.00147807	1.156	0.00178874	1.326	0.00319126	nucleus							PF02893	GRAM domain
F8RJ00	Early light-induced protein, chloroplastic OS=Capsicum annuum OX=4072 GN=ELIP PE=2 SV=1	ELIP	17	1.091	0.97	1.117	0.888	1.004	0.935	0.99	0.941	1.04	1.034	0.993	1.008							1.124	0.107549	0.979	0.519497			chloroplast				GO:0006810 transport; GO:0006950 response to stress; GO:0009266 response to temperature stimulus; GO:0009314 response to radiation; GO:0009408 response to heat; GO:0009409 response to cold; GO:0009411 response to UV; GO:0009416 response to light stimulus; GO:0009628 response to abiotic stimulus; GO:0009637 response to blue light; GO:0009639 response to red or far red light; GO:0009642 response to…	GO:0005622 intracellular; GO:0005623 cell; GO:0005737 cytoplasm; GO:0009507 chloroplast; GO:0009534 chloroplast thylakoid; GO:0009535 chloroplast thylakoid membrane; GO:0009536 plastid; GO:0009579 thylakoid; GO:0016020 membrane; GO:0031976 plastid thylakoid; GO:0031984 organelle subcompartment; GO:0034357 photosynthetic membrane; GO:0042651 thylakoid membrane; GO:0043226 organelle; GO:0043227 mem…
B1PDK0	Peptidyl-prolyl cis-trans isomerase OS=Capsicum annuum OX=4072 GN=T459_32100 PE=2 SV=1	T459_32100	18.1	0.92	0.931	0.904	1.098	1.084	1.094	0.959	1.02	0.981	1.01	1.029	1.009	0.91	0.887	0.851	1.152	1.116	1.107	0.841	5.01543e-05	0.971	0.196482	0.785	0.0004558	chloroplast	K01802	E5.2.1.8; peptidylprolyl isomerase [EC:5.2.1.8]		GO:0000413 protein peptidyl-prolyl isomerization; GO:0006464 cellular protein modification process; GO:0006807 nitrogen compound metabolic process; GO:0007154 cell communication; GO:0007165 signal transduction; GO:0008152 metabolic process; GO:0009987 cellular process; GO:0018193 peptidyl-amino acid modification; GO:0018208 peptidyl-proline modification; GO:0019538 protein metabolic process; GO:0…	GO:0005576 extracellular region; GO:0005622 intracellular; GO:0005623 cell; GO:0005737 cytoplasm; GO:0005773 vacuole; GO:0005774 vacuolar membrane; GO:0005794 Golgi apparatus; GO:0005829 cytosol; GO:0005886 plasma membrane; GO:0005911 cell-cell junction; GO:0009506 plasmodesma; GO:0009507 chloroplast; GO:0009536 plastid; GO:0012505 endomembrane system; GO:0016020 membrane; GO:0030054 cell junctio…	GO:0003755 peptidyl-prolyl cis-trans isomerase activity; GO:0003824 catalytic activity; GO:0005488 binding; GO:0008144 drug binding; GO:0016018 cyclosporin A binding; GO:0016853 isomerase activity; GO:0016859 cis-trans isomerase activity; GO:0033218 amide binding; GO:0042277 peptide binding; GO:0140096 catalytic activity, acting on a protein;	PF00160	Cyclophilin type peptidyl-prolyl cis-trans isomerase/CLD	O	KOG0865	Cyclophilin type peptidyl-prolyl cis-trans isomerase
A0A1U8FRB4	Developmental protein SEPALLATA 2 OS=Capsicum annuum OX=4072 GN=T459_06749 PE=2 SV=1	T459_06749	28.4	0.974	0.972	0.946	1.018	1.048	1.049	0.981	0.952	0.95	1.057	1.052	1.013	0.924	1.016	0.977	1.04	0.967	1.082	0.928	0.00548123	0.923	0.0094162	0.944	0.25498	nucleus	K09264	K09264; MADS-box transcription factor, plant		GO:0000003 reproduction; GO:0003006 developmental process involved in reproduction; GO:0006355 regulation of transcription, DNA-templated; GO:0007275 multicellular organism development; GO:0009791 post-embryonic development; GO:0009889 regulation of biosynthetic process; GO:0009908 flower development; GO:0010468 regulation of gene expression; GO:0010556 regulation of macromolecule biosynthetic pr…	GO:0005622 intracellular; GO:0005623 cell; GO:0005634 nucleus; GO:0043226 organelle; GO:0043227 membrane-bounded organelle; GO:0043229 intracellular organelle; GO:0043231 intracellular membrane-bounded organelle;	GO:0003700 DNA-binding transcription factor activity; GO:0140110 transcription regulator activity;	PF00319	SRF-type transcription factor (DNA-binding and dimerisation domain)	K	KOG0014	MADS box transcription factor
A1YWL8	Squamosa promoter-binding-like protein OS=Capsicum annuum OX=4072 GN=T459_05565 PE=2 SV=1	T459_05565	15.7	0.855	0.798	0.825	1.314	1.112	1.105													0.702	0.00427838					nucleus							PF03110	SBP domain
A0A1U8H9S4	Histone H2B OS=Capsicum annuum OX=4072 GN=T459_18103 PE=2 SV=1	T459_18103	15.9	0.962	0.976	0.99	1.009	1.036	1.015	1.053	1.028	1.005	0.951	0.967	0.99	1.129	1.142	1.084	0.888	0.855	0.874	0.957	0.0186205	1.061	0.0290405	1.282	0.000208473	nucleus	K11252	H2B; histone H2B					PF00125	Core histone H2A/H2B/H3/H4	B	KOG1744	Histone H2B
D7PF27	Stress-related protein OS=Capsicum annuum OX=4072 GN=SRP1 PE=2 SV=1	SRP1	24.8	1.029	1.043	0.959	1.018	0.952	1.015	0.963	0.933	1.056	1.018	1.055	1.056	1.042	1.077	0.952	1.009	0.949	0.981	1.015	0.679988	0.943	0.202443	1.045	0.353494	nucleus				GO:0006996 organelle organization; GO:0009987 cellular process; GO:0010876 lipid localization; GO:0016043 cellular component organization; GO:0019915 lipid storage; GO:0032502 developmental process; GO:0033036 macromolecule localization; GO:0034389 lipid droplet organization; GO:0040007 growth; GO:0040008 regulation of growth; GO:0045927 positive regulation of growth; GO:0048518 positive regulati…	GO:0005622 intracellular; GO:0005623 cell; GO:0005737 cytoplasm; GO:0005773 vacuole; GO:0005811 lipid droplet; GO:0043226 organelle; GO:0043227 membrane-bounded organelle; GO:0043228 non-membrane-bounded organelle; GO:0043229 intracellular organelle; GO:0043231 intracellular membrane-bounded organelle; GO:0043232 intracellular non-membrane-bounded organelle;
B5LAS5	4-coumarate--CoA ligase 1 OS=Capsicum annuum OX=4072 GN=T459_10634 PE=2 SV=1	T459_10634	59.6	1.068	1.053	1.119	0.905	0.933	0.911	0.959	0.983	1.01	1.025	0.989	1.005	0.982	1.049	1.029	0.958	1.076	0.952	1.179	0.0013376	0.978	0.282614	1.025	0.593456	chloroplast	K01904	4CL; 4-coumarate--CoA ligase [EC:6.2.1.12]	map00130 Ubiquinone and other terpenoid-quinone biosynthesis; map00940 Phenylpropanoid biosynthesis; map01100 Metabolic pathways; map01110 Biosynthesis of secondary metabolites	GO:0006725 cellular aromatic compound metabolic process; GO:0008152 metabolic process; GO:0009058 biosynthetic process; GO:0009698 phenylpropanoid metabolic process; GO:0009699 phenylpropanoid biosynthetic process; GO:0009987 cellular process; GO:0019438 aromatic compound biosynthetic process; GO:0019748 secondary metabolic process; GO:0044237 cellular metabolic process; GO:0044249 cellular biosy…	GO:0005622 intracellular; GO:0005623 cell; GO:0005737 cytoplasm;	GO:0003824 catalytic activity; GO:0016207 4-coumarate-CoA ligase activity; GO:0016405 CoA-ligase activity; GO:0016874 ligase activity; GO:0016877 ligase activity, forming carbon-sulfur bonds; GO:0016878 acid-thiol ligase activity;	PF13193	Domain of unknown function (DUF4009)	I	KOG1176	Acyl-CoA synthetase
B5LAV3	2-isopropylmalate synthase B OS=Capsicum annuum OX=4072 GN=T459_16615 PE=2 SV=1	T459_16615	65.5	0.986	0.972	1.013	0.996	0.982	1.038	0.991	0.964	0.971	1.024	1.001	1.044	0.965	0.917	0.949	1.042	1.068	1.022	0.985	0.509083	0.953	0.0316657	0.904	0.0068193	mitochondria	K01649	leuA, IMS; 2-isopropylmalate synthase [EC:2.3.3.13]	map00290 Valine, leucine and isoleucine biosynthesis; map00620 Pyruvate metabolism; map01100 Metabolic pathways; map01110 Biosynthesis of secondary metabolites; map01210 2-Oxocarboxylic acid metabolism; map01230 Biosynthesis of amino acids	GO:0001101 response to acid chemical; GO:0006082 organic acid metabolic process; GO:0006520 cellular amino acid metabolic process; GO:0006551 leucine metabolic process; GO:0006790 sulfur compound metabolic process; GO:0006807 nitrogen compound metabolic process; GO:0006950 response to stress; GO:0008152 metabolic process; GO:0008652 cellular amino acid biosynthetic process; GO:0009058 biosyntheti…	GO:0005622 intracellular; GO:0005623 cell; GO:0005737 cytoplasm; GO:0009507 chloroplast; GO:0009526 plastid envelope; GO:0009532 plastid stroma; GO:0009536 plastid; GO:0009570 chloroplast stroma; GO:0009941 chloroplast envelope; GO:0031967 organelle envelope; GO:0031975 envelope; GO:0043226 organelle; GO:0043227 membrane-bounded organelle; GO:0043229 intracellular organelle; GO:0043231 intracellu…	GO:0003824 catalytic activity; GO:0003852 2-isopropylmalate synthase activity; GO:0010177 2-(2'-methylthio)ethylmalate synthase activity; GO:0016740 transferase activity; GO:0016746 transferase activity, transferring acyl groups; GO:0046912 transferase activity, transferring acyl groups, acyl groups converted into alkyl on transfer;	PF00682; PF08502	HMGL-like; LeuA allosteric (dimerisation) domain	E	KOG2367	Alpha-isopropylmalate synthase/homocitrate synthase
A0A075VSL0	50S ribosomal protein L2, chloroplastic OS=Capsicum annuum OX=4072 GN=orf172 PE=4 SV=1	orf172	19.5	1.093	1.068	1.071	0.935	0.904	0.934	0.995	1.055	0.966	0.976	1.063	0.952	1.066	0.905	1.084	1.075	0.947	0.932	1.166	0.000319368	1.008	0.845649	1.034	0.680462	chloroplast	K02886	RP-L2, MRPL2, rplB; large subunit ribosomal protein L2	map03010 Ribosome	GO:0002181 cytoplasmic translation; GO:0006412 translation; GO:0006518 peptide metabolic process; GO:0006807 nitrogen compound metabolic process; GO:0008152 metabolic process; GO:0009058 biosynthetic process; GO:0009059 macromolecule biosynthetic process; GO:0009987 cellular process; GO:0010467 gene expression; GO:0019538 protein metabolic process; GO:0034641 cellular nitrogen compound metabolic …	GO:0005622 intracellular; GO:0005623 cell; GO:0005737 cytoplasm; GO:0005829 cytosol; GO:0005840 ribosome; GO:0009507 chloroplast; GO:0009526 plastid envelope; GO:0009532 plastid stroma; GO:0009536 plastid; GO:0009570 chloroplast stroma; GO:0009941 chloroplast envelope; GO:0015934 large ribosomal subunit; GO:0016020 membrane; GO:0022625 cytosolic large ribosomal subunit; GO:0022626 cytosolic ribos…	GO:0003676 nucleic acid binding; GO:0003723 RNA binding; GO:0003729 mRNA binding; GO:0003735 structural constituent of ribosome; GO:0005198 structural molecule activity; GO:0005488 binding; GO:0097159 organic cyclic compound binding; GO:1901363 heterocyclic compound binding;	PF00181	Ribosomal Proteins L2, RNA binding domain	J	KOG0438	Mitochondrial/chloroplast ribosomal protein L2
Q8H6D8	Desiccation protectant protein Lea14-like protein OS=Capsicum annuum OX=4072 GN=LEA1 PE=2 SV=1	LEA1	19.3	0.936	0.942	0.938	1.032	1.056	1.032	1.058	1.096	1.05	0.96	0.938	0.93	1.114	1.142	1.136	0.903	0.874	0.878	0.903	0.000202887	1.133	0.00155261	1.278	4.24774e-05	cytoplasm				GO:0006950 response to stress; GO:0006952 defense response; GO:0009314 response to radiation; GO:0009416 response to light stimulus; GO:0009605 response to external stimulus; GO:0009607 response to biotic stimulus; GO:0009611 response to wounding; GO:0009620 response to fungus; GO:0009628 response to abiotic stimulus; GO:0009642 response to light intensity; GO:0009644 response to high light inten…	GO:0005576 extracellular region; GO:0005622 intracellular; GO:0005623 cell; GO:0005737 cytoplasm; GO:0005829 cytosol; GO:0005886 plasma membrane; GO:0016020 membrane; GO:0048046 apoplast; GO:0071944 cell periphery;		PF03168	Late embryogenesis abundant protein
A0A1U8FK99	Peptidyl-prolyl cis-trans isomerase CYP26-2, chloroplastic OS=Capsicum annuum OX=4072 GN=T459_10837 PE=4 SV=1	T459_10837	34.5	0.877	1.04	1.103	0.884	1.047	1.052													1.012	0.908938					chloroplast	K03768	PPIB, ppiB; peptidyl-prolyl cis-trans isomerase B (cyclophilin B) [EC:5.2.1.8]		GO:0000413 protein peptidyl-prolyl isomerization; GO:0006464 cellular protein modification process; GO:0006807 nitrogen compound metabolic process; GO:0007275 multicellular organism development; GO:0008152 metabolic process; GO:0009987 cellular process; GO:0018193 peptidyl-amino acid modification; GO:0018208 peptidyl-proline modification; GO:0019538 protein metabolic process; GO:0022622 root syst…	GO:0005622 intracellular; GO:0005623 cell; GO:0005737 cytoplasm; GO:0005783 endoplasmic reticulum; GO:0005911 cell-cell junction; GO:0009506 plasmodesma; GO:0009507 chloroplast; GO:0009536 plastid; GO:0012505 endomembrane system; GO:0030054 cell junction; GO:0043226 organelle; GO:0043227 membrane-bounded organelle; GO:0043229 intracellular organelle; GO:0043231 intracellular membrane-bounded orga…	GO:0003755 peptidyl-prolyl cis-trans isomerase activity; GO:0003824 catalytic activity; GO:0016853 isomerase activity; GO:0016859 cis-trans isomerase activity; GO:0140096 catalytic activity, acting on a protein;	PF00160	Cyclophilin type peptidyl-prolyl cis-trans isomerase/CLD	O	KOG0865	Cyclophilin type peptidyl-prolyl cis-trans isomerase
A0A2G2XTF7	E3 ubiquitin-protein ligase UPL6 OS=Capsicum annuum OX=4072 GN=T459_01329 PE=4 SV=1	T459_01329	117.4	0.774	0.969	1.349	0.864	1.207	0.836	0.893	0.975	1.025	1.089	1.029	0.993							1.064	0.815813	0.93	0.203525			cytoplasm	K10589	UBE3C; ubiquitin-protein ligase E3 C [EC:2.3.2.26]	map04120 Ubiquitin mediated proteolysis	GO:0006464 cellular protein modification process; GO:0006807 nitrogen compound metabolic process; GO:0008152 metabolic process; GO:0009987 cellular process; GO:0016567 protein ubiquitination; GO:0019538 protein metabolic process; GO:0032446 protein modification by small protein conjugation; GO:0036211 protein modification process; GO:0043170 macromolecule metabolic process; GO:0043412 macromolecu…	GO:0005622 intracellular; GO:0005623 cell; GO:0005737 cytoplasm;	GO:0003824 catalytic activity; GO:0004842 ubiquitin-protein transferase activity; GO:0016740 transferase activity; GO:0019787 ubiquitin-like protein transferase activity; GO:0061630 ubiquitin protein ligase activity; GO:0061659 ubiquitin-like protein ligase activity; GO:0140096 catalytic activity, acting on a protein;	PF00632	HECT-domain (ubiquitin-transferase)	O	KOG0942	E3 ubiquitin protein ligase
Q1W4A2	Xyloglucan endotransglucosylase/hydrolase OS=Capsicum annuum OX=4072 GN=T459_20400 PE=2 SV=1	T459_20400	32.6							1.043	1.253	1.218	0.759	0.893	0.845									1.407	0.0101648			extracellular	K08235	E2.4.1.207; xyloglucan:xyloglucosyl transferase [EC:2.4.1.207]					PF00722	Glycosyl hydrolases family 16
A0A2G2YUY1	Glucan endo-1,3-beta-glucosidase 12 OS=Capsicum annuum OX=4072 GN=T459_24299 PE=3 SV=1	T459_24299	61.3	0.968	0.99	0.924	0.993	1.072	1.02	0.976	1.001	0.96	1.052	0.975	1.004	1.139	1.106	1.159	0.851	0.943	0.81	0.934	0.0879985	0.969	0.284782	1.307	0.0045015	chloroplast					GO:0005623 cell; GO:0005886 plasma membrane; GO:0016020 membrane; GO:0031224 intrinsic component of membrane; GO:0031225 anchored component of membrane; GO:0031226 intrinsic component of plasma membrane; GO:0046658 anchored component of plasma membrane; GO:0071944 cell periphery;	GO:0003824 catalytic activity; GO:0004553 hydrolase activity, hydrolyzing O-glycosyl compounds; GO:0005488 binding; GO:0016787 hydrolase activity; GO:0016798 hydrolase activity, acting on glycosyl bonds; GO:0030246 carbohydrate binding; GO:0030247 polysaccharide binding;	PF00332; PF07983	Glycosyl hydrolases family 17; X8 domain
A0A2G2YQF9	40S ribosomal protein S23 OS=Capsicum annuum OX=4072 GN=T459_22765 PE=3 SV=1	T459_22765	15.1	0.984	0.964	0.982	0.991	0.985	1.069	1.003	0.981	0.923	1.025	0.98	1.032	1.089	1.004	0.975	0.95	0.986	0.975	0.962	0.235441	0.957	0.21143	1.054	0.213307	cytoplasm	K02973	RP-S23e, RPS23; small subunit ribosomal protein S23e	map03010 Ribosome						J	KOG1749	40S ribosomal protein S23
B5LAV0	Putative hydroxycinnamoyl transferase OS=Capsicum annuum OX=4072 GN=T459_10609 PE=2 SV=1	T459_10609	48.1	0.933	0.96	0.942	1.062	1.062	1.084	1.004	1.015	0.974	0.972	0.956	1.098	1.201	1.103	1.107	0.911	0.872	0.875	0.884	0.000334068	0.989	0.849435	1.283	0.0013291	cytoplasm	K13065	E2.3.1.133, HCT; shikimate O-hydroxycinnamoyltransferase [EC:2.3.1.133]	map00940 Phenylpropanoid biosynthesis; map00941 Flavonoid biosynthesis; map00945 Stilbenoid, diarylheptanoid and gingerol biosynthesis; map01100 Metabolic pathways; map01110 Biosynthesis of secondary metabolites	GO:0006725 cellular aromatic compound metabolic process; GO:0008152 metabolic process; GO:0009058 biosynthetic process; GO:0009698 phenylpropanoid metabolic process; GO:0009699 phenylpropanoid biosynthetic process; GO:0009808 lignin metabolic process; GO:0009809 lignin biosynthetic process; GO:0009889 regulation of biosynthetic process; GO:0009891 positive regulation of biosynthetic process; GO:0…	GO:0005622 intracellular; GO:0005623 cell; GO:0005737 cytoplasm; GO:0005829 cytosol; GO:0016020 membrane;	GO:0003824 catalytic activity; GO:0008374 O-acyltransferase activity; GO:0016740 transferase activity; GO:0016746 transferase activity, transferring acyl groups; GO:0016747 transferase activity, transferring acyl groups other than amino-acyl groups; GO:0047172 shikimate O-hydroxycinnamoyltransferase activity; GO:0047205 quinate O-hydroxycinnamoyltransferase activity; GO:0050734 hydroxycinnamoyltr…
Q712P2	Calmodulin OS=Capsicum annuum OX=4072 GN=calmodulin 3 PE=2 SV=1	calmodulin	16.9	0.913	0.824	0.926	1.066	1.234	1.043	0.874	0.88	0.852	1.177	1.118	1.056	0.993	1.023	1.005	0.959	0.965	0.95	0.797	0.0246402	0.778	0.00158441	1.051	0.00698454	nucleus	K02183	CALM; calmodulin	map04016 MAPK signaling pathway - plant; map04070 Phosphatidylinositol signaling system; map04626 Plant-pathogen interaction				PF13499	EF-hand domain pair	T	KOG0027	Calmodulin and related proteins (EF-Hand superfamily)
Q42493	Fibrillin OS=Capsicum annuum OX=4072 GN=pap1 PE=2 SV=1	pap1	35.2	0.905	0.881	0.925	1.075	1.092	1.069	1.069	1.07	1.06	0.947	0.961	0.935	1.108	1.113	1.135	0.906	0.887	0.867	0.838	0.000331419	1.125	0.000153662	1.262	9.32716e-05	cytoplasm,nucleus				GO:0001101 response to acid chemical; GO:0006950 response to stress; GO:0009266 response to temperature stimulus; GO:0009314 response to radiation; GO:0009409 response to cold; GO:0009414 response to water deprivation; GO:0009415 response to water; GO:0009416 response to light stimulus; GO:0009628 response to abiotic stimulus; GO:0009642 response to light intensity; GO:0009644 response to high li…	GO:0005622 intracellular; GO:0005623 cell; GO:0005634 nucleus; GO:0005737 cytoplasm; GO:0005739 mitochondrion; GO:0009507 chloroplast; GO:0009526 plastid envelope; GO:0009532 plastid stroma; GO:0009534 chloroplast thylakoid; GO:0009535 chloroplast thylakoid membrane; GO:0009536 plastid; GO:0009570 chloroplast stroma; GO:0009579 thylakoid; GO:0010287 plastoglobule; GO:0010319 stromule; GO:0016020 …
Q6RJY1	60S ribosomal protein L12 OS=Capsicum annuum OX=4072 GN=T459_18183 PE=2 SV=1	T459_18183	17.7	0.967	0.989	0.987	1.013	1.019	1.043	1.122	1.086	1.043	0.93	0.93	0.91	1.104	1.027	1.058	0.979	0.872	0.875	0.957	0.0186003	1.174	0.00201992	1.17	0.0220427	cytoplasm	K02870	RP-L12e, RPL12; large subunit ribosomal protein L12e	map03010 Ribosome				PF03946; PF00298	Ribosomal protein L11, N-terminal domain; Ribosomal protein L11, RNA binding domain	J	KOG0886	40S ribosomal protein S2
A0A1U8G339	MAP kinase kinase 5 OS=Capsicum annuum OX=4072 GN=MAPKK5 PE=2 SV=1	MAPKK5	41.7	0.989	0.993	0.957	1.08	1.027	0.942	0.997	1.019	1.008	0.972	0.97	1.008	0.973	1.066	0.928	1.02	1.011	1.01	0.964	0.443943	1.025	0.149597	0.976	0.554463	chloroplast	K13413	MKK4_5; mitogen-activated protein kinase kinase 4/5 [EC:2.7.12.2]	map04016 MAPK signaling pathway - plant; map04075 Plant hormone signal transduction; map04626 Plant-pathogen interaction	GO:0000003 reproduction; GO:0001932 regulation of protein phosphorylation; GO:0001934 positive regulation of protein phosphorylation; GO:0002376 immune system process; GO:0003006 developmental process involved in reproduction; GO:0006464 cellular protein modification process; GO:0006468 protein phosphorylation; GO:0006521 regulation of cellular amino acid metabolic process; GO:0006793 phosphorus …	GO:0005622 intracellular; GO:0005623 cell; GO:0005634 nucleus; GO:0005737 cytoplasm; GO:0009507 chloroplast; GO:0009532 plastid stroma; GO:0009536 plastid; GO:0009570 chloroplast stroma; GO:0043226 organelle; GO:0043227 membrane-bounded organelle; GO:0043229 intracellular organelle; GO:0043231 intracellular membrane-bounded organelle;	GO:0003824 catalytic activity; GO:0004672 protein kinase activity; GO:0004674 protein serine/threonine kinase activity; GO:0016301 kinase activity; GO:0016740 transferase activity; GO:0016772 transferase activity, transferring phosphorus-containing groups; GO:0016773 phosphotransferase activity, alcohol group as acceptor; GO:0140096 catalytic activity, acting on a protein;	PF00069	Protein kinase domain	T	KOG0581	Mitogen-activated protein kinase kinase (MAP2K)
B5LAX7	Candidate cinnamic acid 4-hydroxylase OS=Capsicum annuum OX=4072 GN=T459_18415 PE=2 SV=1	T459_18415	58	1.044	1.019	1.025	0.951	0.991	0.967	1.014	0.986	1.017	1.003	0.96	1.005	1.076	1.06	1.083	0.927	0.919	0.932	1.062	0.0129832	1.017	0.409034	1.159	4.0885e-05	cytoplasm	K00487	CYP73A; trans-cinnamate 4-monooxygenase [EC:1.14.14.91]	map00130 Ubiquinone and other terpenoid-quinone biosynthesis; map00940 Phenylpropanoid biosynthesis; map00941 Flavonoid biosynthesis; map00945 Stilbenoid, diarylheptanoid and gingerol biosynthesis; map01100 Metabolic pathways; map01110 Biosynthesis of secondary metabolites	GO:0006725 cellular aromatic compound metabolic process; GO:0006732 coenzyme metabolic process; GO:0006733 oxidoreduction coenzyme metabolic process; GO:0006743 ubiquinone metabolic process; GO:0006744 ubiquinone biosynthetic process; GO:0007275 multicellular organism development; GO:0008152 metabolic process; GO:0009058 biosynthetic process; GO:0009108 coenzyme biosynthetic process; GO:0009555 p…	GO:0005618 cell wall; GO:0005622 intracellular; GO:0005623 cell; GO:0005737 cytoplasm; GO:0005773 vacuole; GO:0005774 vacuolar membrane; GO:0005783 endoplasmic reticulum; GO:0005794 Golgi apparatus; GO:0005886 plasma membrane; GO:0005911 cell-cell junction; GO:0009505 plant-type cell wall; GO:0009506 plasmodesma; GO:0012505 endomembrane system; GO:0016020 membrane; GO:0030054 cell junction; GO:00…	GO:0003824 catalytic activity; GO:0004497 monooxygenase activity; GO:0005488 binding; GO:0005515 protein binding; GO:0016491 oxidoreductase activity; GO:0016705 oxidoreductase activity, acting on paired donors, with incorporation or reduction of molecular oxygen; GO:0016709 oxidoreductase activity, acting on paired donors, with incorporation or reduction of molecular oxygen, NAD(P)H as one donor,…	PF00067	Cytochrome P450	Q	KOG0156	Cytochrome P450 CYP2 subfamily
A0A023JGF9	DIN1 OS=Capsicum annuum OX=4072 GN=T459_06129 PE=2 SV=1	T459_06129	19.4	0.959	0.876	1.054	1.056	1.093	1.055	0.936	1.069	1.049	0.977	0.993	0.974	0.907	1.019	1.01	1.068	1.011	0.992	0.902	0.123934	1.037	0.450596	0.956	0.351137	chloroplast				GO:0001101 response to acid chemical; GO:0006950 response to stress; GO:0006979 response to oxidative stress; GO:0007568 aging; GO:0009611 response to wounding; GO:0009719 response to endogenous stimulus; GO:0009725 response to hormone; GO:0009753 response to jasmonic acid; GO:0010033 response to organic substance; GO:0032502 developmental process; GO:0042221 response to chemical; GO:0050896 resp…	GO:0005622 intracellular; GO:0005623 cell; GO:0005737 cytoplasm; GO:0009507 chloroplast; GO:0009536 plastid; GO:0043226 organelle; GO:0043227 membrane-bounded organelle; GO:0043229 intracellular organelle; GO:0043231 intracellular membrane-bounded organelle;	GO:0003824 catalytic activity; GO:0004792 thiosulfate sulfurtransferase activity; GO:0016740 transferase activity; GO:0016782 transferase activity, transferring sulfur-containing groups; GO:0016783 sulfurtransferase activity;	PF00581	Rhodanese-like domain	P	KOG1530	Rhodanese-related sulfurtransferase
A0A1D5AHY8	Pvr4 OS=Capsicum annuum OX=4072 GN=Pvr4 PE=2 SV=1	Pvr4	199.4	1.162	1.16	1.137	0.817	0.885	0.844	1.066	0.916	1.042	0.932	0.982	1.068	0.824	0.942	1.08	1.039	1.026	1.092	1.359	0.000223952	1.014	0.838956	0.901	0.245035	cytoplasm	K13459	RPS2; disease resistance protein RPS2	map04626 Plant-pathogen interaction				PF00931	NB-ARC domain	T	KOG4658	Apoptotic ATPase
Q5EDD1	Calcium-dependent protein kinase 32 OS=Capsicum annuum OX=4072 GN=CDPK4 PE=2 SV=1	CDPK4	59.4	1.102	1.048	1.074	0.902	0.879	0.944	0.942	0.888	0.964	1.048	1.04	1.096	0.911	0.964	0.931	1.065	1.046	1.053	1.183	0.00268735	0.878	0.0112219	0.887	0.00223976	chloroplast	K13412	CPK; calcium-dependent protein kinase [EC:2.7.11.1]	map04626 Plant-pathogen interaction	GO:0001101 response to acid chemical; GO:0006464 cellular protein modification process; GO:0006468 protein phosphorylation; GO:0006793 phosphorus metabolic process; GO:0006796 phosphate-containing compound metabolic process; GO:0006807 nitrogen compound metabolic process; GO:0007154 cell communication; GO:0007165 signal transduction; GO:0008152 metabolic process; GO:0009719 response to endogenous…	GO:0005622 intracellular; GO:0005623 cell; GO:0005634 nucleus; GO:0005737 cytoplasm; GO:0005886 plasma membrane; GO:0016020 membrane; GO:0043226 organelle; GO:0043227 membrane-bounded organelle; GO:0043229 intracellular organelle; GO:0043231 intracellular membrane-bounded organelle; GO:0071944 cell periphery;	GO:0003824 catalytic activity; GO:0004672 protein kinase activity; GO:0004674 protein serine/threonine kinase activity; GO:0004683 calmodulin-dependent protein kinase activity; GO:0005488 binding; GO:0005515 protein binding; GO:0005516 calmodulin binding; GO:0009931 calcium-dependent protein serine/threonine kinase activity; GO:0010857 calcium-dependent protein kinase activity; GO:0016301 kinase …	PF00069; PF13833; PF13499	Protein kinase domain; EF-hand domain pair; EF-hand domain pair	T	KOG0032	Ca2+/calmodulin-dependent protein kinase, EF-Hand protein superfamily
A0A2G2ZJY6	F-box protein PP2-B10-like(predicted) OS=Capsicum annuum OX=4072 GN=T459_15314 PE=4 SV=1	T459_15314	32.9	0.573	0.633	0.635	1.456	1.38	1.334	0.943	0.959	0.932	1.151	1.068	0.961							0.441	4.20211e-05	0.891	0.100886			chloroplast
A0A023JGD7	Ribulose bisphosphate carboxylase small chain OS=Capsicum annuum OX=4072 GN=T459_04234 PE=2 SV=1	T459_04234	20.5	0.91	0.906	0.859	1.102	1.118	1.099	0.927	0.889	0.9	1.105	1.075	1.074	1.008	1.066	1.028	0.989	0.99	0.926	0.806	0.000361447	0.835	0.000311745	1.068	0.0750047	chloroplast	K01602	rbcS; ribulose-bisphosphate carboxylase small chain [EC:4.1.1.39]	map00630 Glyoxylate and dicarboxylate metabolism; map00710 Carbon fixation in photosynthetic organisms; map01100 Metabolic pathways; map01110 Biosynthesis of secondary metabolites; map01200 Carbon metabolism		GO:0005622 intracellular; GO:0005623 cell; GO:0005737 cytoplasm; GO:0009507 chloroplast; GO:0009536 plastid; GO:0043226 organelle; GO:0043227 membrane-bounded organelle; GO:0043229 intracellular organelle; GO:0043231 intracellular membrane-bounded organelle;		PF00101	Ribulose bisphosphate carboxylase, small chain
Q2VT57	Cold-inducible protein OS=Capsicum annuum OX=4072 GN=T459_15194 PE=2 SV=1	T459_15194	11.9	1.062	1.134	1.145	0.736	0.962	0.898	1.326	1.043	1.181	0.833	0.804	0.78	0.935	0.999	1.026	0.978	1.008	1.062	1.287	0.0368131	1.469	0.00614061	0.971	0.466107	nucleus
J7HAS6	50S ribosomal protein L33, chloroplastic OS=Capsicum annuum OX=4072 GN=rpl33 PE=3 SV=1	rpl33	7.7	0.952	0.893	0.792	1.176	1.131	1.064							1.169	1.062	1.085	0.894	0.818	0.984	0.782	0.015609			1.23	0.0263142	cytoplasm	K02913	RP-L33, MRPL33, rpmG; large subunit ribosomal protein L33	map03010 Ribosome		GO:0005622 intracellular; GO:0005623 cell; GO:0005737 cytoplasm; GO:0009507 chloroplast; GO:0009536 plastid; GO:0043226 organelle; GO:0043227 membrane-bounded organelle; GO:0043229 intracellular organelle; GO:0043231 intracellular membrane-bounded organelle;
J7H9I9	Photosystem I P700 chlorophyll a apoprotein A2 OS=Capsicum annuum OX=4072 GN=psaB PE=3 SV=1	psaB	82.3	1.039	1.076	1.039	0.912	0.968	0.962	1	1.01	1	1.014	1.038	0.969	0.99	1.016	1.022	0.983	1.015	1.022	1.11	0.00932526	0.996	0.881413	1.003	0.870207	mitochondria	K02690	psaB; photosystem I P700 chlorophyll a apoprotein A2	map00195 Photosynthesis; map01100 Metabolic pathways
Q49HP3	SKP1-like protein 1B OS=Capsicum annuum OX=4072 GN=T459_32156 PE=2 SV=1	T459_32156	17.5	0.984	0.936	0.998	1.045	1.03	1.049	0.929	0.964	0.983	1.052	1.031	1.094	0.948	0.998	1.01	1.032	1.041	0.978	0.934	0.027585	0.905	0.0143749	0.969	0.314888	nucleus	K03094	SKP1, CBF3D; S-phase kinase-associated protein 1	map04120 Ubiquitin mediated proteolysis; map04141 Protein processing in endoplasmic reticulum				PF03931; PF01466	Skp1 family, tetramerisation domain; Skp1 family, dimerisation domain	O	KOG1724	SCF ubiquitin ligase, Skp1 component
Q42393	Sn-1 protein OS=Capsicum annuum OX=4072 GN=Sn-1 PE=4 SV=1	Sn-1	16.8	0.995	0.985	0.954	1.028	1.01	1.032	1.087	1.057	1.044	0.93	0.97	0.954	1.173	1.176	1.184	0.825	0.836	0.85	0.956	0.0337222	1.117	0.00293726	1.407	2.97555e-06	cytoplasm					GO:0005622 intracellular; GO:0005623 cell; GO:0005737 cytoplasm; GO:0009507 chloroplast; GO:0009536 plastid; GO:0043226 organelle; GO:0043227 membrane-bounded organelle; GO:0043229 intracellular organelle; GO:0043231 intracellular membrane-bounded organelle;		PF00407	Pathogenesis-related protein Bet v I family
A0A2G2YYD6	Photosystem II CP43 reaction center protein OS=Capsicum annuum OX=4072 GN=T459_16087 PE=3 SV=1	T459_16087	51.9	1.041	1.009	1.016	0.948	0.97	0.985	1.015	1.011	1.029	0.953	0.994	0.99	1.098	1.14	1.092	0.892	0.946	0.896	1.056	0.0200876	1.04	0.0520499	1.218	0.00105199	plasma membrane	K02705	psbC; photosystem II CP43 chlorophyll apoprotein	map00195 Photosynthesis; map01100 Metabolic pathways
F2YL87	Lipoxygenase OS=Capsicum annuum OX=4072 GN=LOX PE=2 SV=1	LOX	101	1.158	1.132	1.122	0.853	0.864	0.868	0.99	0.959	0.953	1.064	1.03	1.027	1.012	1.001	0.996	1.013	0.995	0.98	1.32	1.33897e-05	0.93	0.0112695	1.007	0.543487	chloroplast	K00454	LOX2S; lipoxygenase [EC:1.13.11.12]	map00591 Linoleic acid metabolism; map00592 alpha-Linolenic acid metabolism; map01100 Metabolic pathways; map01110 Biosynthesis of secondary metabolites	GO:0006082 organic acid metabolic process; GO:0006629 lipid metabolic process; GO:0006631 fatty acid metabolic process; GO:0006690 icosanoid metabolic process; GO:0008152 metabolic process; GO:0009987 cellular process; GO:0010597 green leaf volatile biosynthetic process; GO:0019372 lipoxygenase pathway; GO:0019752 carboxylic acid metabolic process; GO:0032787 monocarboxylic acid metabolic process…	GO:0005622 intracellular; GO:0005623 cell; GO:0005737 cytoplasm; GO:0009507 chloroplast; GO:0009532 plastid stroma; GO:0009534 chloroplast thylakoid; GO:0009536 plastid; GO:0009570 chloroplast stroma; GO:0009579 thylakoid; GO:0031976 plastid thylakoid; GO:0031984 organelle subcompartment; GO:0043226 organelle; GO:0043227 membrane-bounded organelle; GO:0043229 intracellular organelle; GO:0043231 i…	GO:0003824 catalytic activity; GO:0016165 linoleate 13S-lipoxygenase activity; GO:0016491 oxidoreductase activity; GO:0016701 oxidoreductase activity, acting on single donors with incorporation of molecular oxygen; GO:0016702 oxidoreductase activity, acting on single donors with incorporation of molecular oxygen, incorporation of two atoms of oxygen; GO:0051213 dioxygenase activity;	PF01477; PF00305	PLAT/LH2 domain; Lipoxygenase
A0A089FZ95	Dehydroascorbate reductase OS=Capsicum annuum OX=4072 GN=DHAR PE=2 SV=1	DHAR	23.6	0.935	0.931	0.904	1.103	1.064	1.052	1.044	1.028	1.005	0.993	0.977	0.947	1.132	1.161	1.115	0.887	0.871	0.862	0.861	0.00107637	1.055	0.0396126	1.301	5.37272e-05	cytoplasm	K21888	DHAR; glutathione dehydrogenase/transferase [EC:1.8.5.1 2.5.1.18]	map00053 Ascorbate and aldarate metabolism; map00480 Glutathione metabolism; map01100 Metabolic pathways	GO:0000302 response to reactive oxygen species; GO:0001101 response to acid chemical; GO:0005975 carbohydrate metabolic process; GO:0005996 monosaccharide metabolic process; GO:0006082 organic acid metabolic process; GO:0006464 cellular protein modification process; GO:0006518 peptide metabolic process; GO:0006575 cellular modified amino acid metabolic process; GO:0006732 coenzyme metabolic proce…	GO:0005576 extracellular region; GO:0005622 intracellular; GO:0005623 cell; GO:0005737 cytoplasm; GO:0005739 mitochondrion; GO:0005773 vacuole; GO:0005777 peroxisome; GO:0005829 cytosol; GO:0005886 plasma membrane; GO:0009507 chloroplast; GO:0009532 plastid stroma; GO:0009536 plastid; GO:0009570 chloroplast stroma; GO:0016020 membrane; GO:0042579 microbody; GO:0043226 organelle; GO:0043227 membra…	GO:0003824 catalytic activity; GO:0004364 glutathione transferase activity; GO:0005488 binding; GO:0005507 copper ion binding; GO:0015036 disulfide oxidoreductase activity; GO:0015037 peptide disulfide oxidoreductase activity; GO:0015038 glutathione disulfide oxidoreductase activity; GO:0016209 antioxidant activity; GO:0016491 oxidoreductase activity; GO:0016667 oxidoreductase activity, acting on…	PF13417	Glutathione S-transferase, N-terminal domain	P	KOG1422	Intracellular Cl- channel CLIC, contains GST domain
J7H3X7	30S ribosomal protein S8, chloroplastic OS=Capsicum annuum OX=4072 GN=rps8 PE=3 SV=1	rps8	15.8													1.18	0.979	1.028	0.909	0.92	0.996					1.128	0.13303	cytoplasm	K02994	RP-S8, rpsH; small subunit ribosomal protein S8	map03010 Ribosome		GO:0005622 intracellular; GO:0005623 cell; GO:0005737 cytoplasm; GO:0005829 cytosol; GO:0005840 ribosome; GO:0009507 chloroplast; GO:0009526 plastid envelope; GO:0009532 plastid stroma; GO:0009536 plastid; GO:0009570 chloroplast stroma; GO:0009941 chloroplast envelope; GO:0015935 small ribosomal subunit; GO:0016020 membrane; GO:0022626 cytosolic ribosome; GO:0022627 cytosolic small ribosomal subu…	GO:0003735 structural constituent of ribosome; GO:0005198 structural molecule activity;	PF00410	Ribosomal protein S8	J	KOG1754	40S ribosomal protein S15/S22
C0LF68	Glutathione S-transferase (Fragment) OS=Capsicum annuum OX=4072 GN=GST PE=2 SV=1	GST	24.9	1.032	0.996	0.994	1	1.007	0.98	1.088	1.071	1.09	0.922	0.942	0.918	1.148	1.144	1.12	0.873	0.886	0.862	1.012	0.474214	1.168	9.04961e-05	1.302	1.83884e-05	chloroplast	K00799	GST, gst; glutathione S-transferase [EC:2.5.1.18]	map00480 Glutathione metabolism; map01100 Metabolic pathways	GO:0001101 response to acid chemical; GO:0006518 peptide metabolic process; GO:0006575 cellular modified amino acid metabolic process; GO:0006749 glutathione metabolic process; GO:0006790 sulfur compound metabolic process; GO:0006807 nitrogen compound metabolic process; GO:0006950 response to stress; GO:0008152 metabolic process; GO:0009056 catabolic process; GO:0009266 response to temperature st…	GO:0005622 intracellular; GO:0005623 cell; GO:0005737 cytoplasm;	GO:0003824 catalytic activity; GO:0004364 glutathione transferase activity; GO:0016740 transferase activity; GO:0016765 transferase activity, transferring alkyl or aryl (other than methyl) groups;	PF02798; PF00043	Glutathione S-transferase, N-terminal domain; Glutathione S-transferase, C-terminal domain	O	KOG0406	Glutathione S-transferase
B5LAV8	Putative acyl-carrier-protein S-malonyltransferase/ transferase OS=Capsicum annuum OX=4072 GN=T459_03364 PE=2 SV=1	T459_03364	40.7	0.929	1.022	0.988	1.032	1.053	0.982	1.064	1.008	0.991	1.016	1.057	0.937	1.031	1.01	1.022	0.945	0.992	0.95	0.958	0.28427	1.018	0.682493	1.061	0.0227445	chloroplast	K00645	fabD, MCAT, MCT1; [acyl-carrier-protein] S-malonyltransferase [EC:2.3.1.39]	map00061 Fatty acid biosynthesis; map01100 Metabolic pathways; map01212 Fatty acid metabolism				PF00698	Acyl transferase domain	I	KOG2926	Malonyl-CoA:ACP transacylase
A0A172QZV1	NAC domain-containing protein 45 OS=Capsicum annuum OX=4072 GN=T459_09731 PE=2 SV=1	T459_09731	69.9	0.972	1.11	0.989	0.95	1.037	0.948	1.092	1.082	0.982	1.062	0.948	0.844	1.174	1.143	1.069	0.892	0.884	0.852	1.046	0.433654	1.106	0.235915	1.288	0.00126002	nucleus				GO:0002230 positive regulation of defense response to virus by host; GO:0002237 response to molecule of bacterial origin; GO:0002376 immune system process; GO:0002682 regulation of immune system process; GO:0002697 regulation of immune effector process; GO:0002831 regulation of response to biotic stimulus; GO:0006355 regulation of transcription, DNA-templated; GO:0006950 response to stress; GO:00…	GO:0005622 intracellular; GO:0005623 cell; GO:0005634 nucleus; GO:0005737 cytoplasm; GO:0005886 plasma membrane; GO:0016020 membrane; GO:0043226 organelle; GO:0043227 membrane-bounded organelle; GO:0043229 intracellular organelle; GO:0043231 intracellular membrane-bounded organelle; GO:0071944 cell periphery;	GO:0001067 regulatory region nucleic acid binding; GO:0003676 nucleic acid binding; GO:0003677 DNA binding; GO:0003700 DNA-binding transcription factor activity; GO:0003712 transcription coregulator activity; GO:0003713 transcription coactivator activity; GO:0005488 binding; GO:0005515 protein binding; GO:0043621 protein self-association; GO:0097159 organic cyclic compound binding; GO:0140110 tra…
J7H3T5	50S ribosomal protein L20, chloroplastic OS=Capsicum annuum OX=4072 GN=rpl20 PE=3 SV=1	rpl20	18	0.998	1.014	1.026	0.965	0.986	1.016													1.024	0.232832					chloroplast	K02887	RP-L20, MRPL20, rplT; large subunit ribosomal protein L20	map03010 Ribosome	GO:0000027 ribosomal large subunit assembly; GO:0006996 organelle organization; GO:0009987 cellular process; GO:0016043 cellular component organization; GO:0022607 cellular component assembly; GO:0022613 ribonucleoprotein complex biogenesis; GO:0022618 ribonucleoprotein complex assembly; GO:0034622 cellular protein-containing complex assembly; GO:0042254 ribosome biogenesis; GO:0042255 ribosome a…	GO:0005622 intracellular; GO:0005623 cell; GO:0005737 cytoplasm; GO:0009507 chloroplast; GO:0009526 plastid envelope; GO:0009532 plastid stroma; GO:0009536 plastid; GO:0009570 chloroplast stroma; GO:0009941 chloroplast envelope; GO:0031967 organelle envelope; GO:0031975 envelope; GO:0043226 organelle; GO:0043227 membrane-bounded organelle; GO:0043229 intracellular organelle; GO:0043231 intracellu…	GO:0003735 structural constituent of ribosome; GO:0005198 structural molecule activity;			J	KOG4707	Mitochondrial/chloroplast ribosomal protein L20
A0A2G2Y4E8	Cysteine proteinase inhibitor 1 OS=Capsicum annuum OX=4072 GN=T459_29061 PE=3 SV=1	T459_29061	12.9	0.942	0.897	0.929	1.082	1.078	1.078	1.043	1.021	1.07	1.006	0.988	0.944	1.15	1.179	1.152	0.88	0.825	0.813	0.855	0.000425348	1.067	0.0497228	1.382	0.000223921	extracellular	K13899	CST3; cystatin-C
A0A2G3ALJ3	Cytochrome f OS=Capsicum annuum OX=4072 GN=petA PE=3 SV=1	petA	35.2	1.056	1.076	1.034	0.941	0.92	0.966	1.025	1.026	0.998	0.978	1.004	0.972	1.133	1.12	1.094	0.915	0.889	0.866	1.12	0.00338382	1.032	0.0780661	1.254	0.00028214	mitochondria	K02634	petA; apocytochrome f	map00195 Photosynthesis; map01100 Metabolic pathways	GO:0006091 generation of precursor metabolites and energy; GO:0008152 metabolic process; GO:0009767 photosynthetic electron transport chain; GO:0009987 cellular process; GO:0015979 photosynthesis; GO:0019684 photosynthesis, light reaction; GO:0022900 electron transport chain; GO:0044237 cellular metabolic process; GO:0055114 oxidation-reduction process;	GO:0005622 intracellular; GO:0005623 cell; GO:0005737 cytoplasm; GO:0009507 chloroplast; GO:0009512 cytochrome b6f complex; GO:0009534 chloroplast thylakoid; GO:0009535 chloroplast thylakoid membrane; GO:0009536 plastid; GO:0009579 thylakoid; GO:0016020 membrane; GO:0031976 plastid thylakoid; GO:0031984 organelle subcompartment; GO:0032991 protein-containing complex; GO:0034357 photosynthetic mem…		PF01333	Apocytochrome F, C-terminal
A0A1U8DZA9	40S ribosomal protein S16 OS=Capsicum annuum OX=4072 GN=T459_02663 PE=3 SV=1	T459_02663	17	1.035	1.074	1.094	0.931	0.926	0.918	1.074	1.001	1.02	0.991	0.954	0.951	1.051	1.035	1.071	1.028	0.942	0.972	1.154	0.00104119	1.069	0.0562503	1.073	0.06039	cytoplasm	K02960	RP-S16e, RPS16; small subunit ribosomal protein S16e	map03010 Ribosome	GO:0000462 maturation of SSU-rRNA from tricistronic rRNA transcript (SSU-rRNA, 5.8S rRNA, LSU-rRNA); GO:0006139 nucleobase-containing compound metabolic process; GO:0006364 rRNA processing; GO:0006396 RNA processing; GO:0006412 translation; GO:0006518 peptide metabolic process; GO:0006725 cellular aromatic compound metabolic process; GO:0006807 nitrogen compound metabolic process; GO:0008152 meta…	GO:0005618 cell wall; GO:0005622 intracellular; GO:0005623 cell; GO:0005634 nucleus; GO:0005730 nucleolus; GO:0005737 cytoplasm; GO:0005829 cytosol; GO:0005840 ribosome; GO:0005844 polysome; GO:0005911 cell-cell junction; GO:0009506 plasmodesma; GO:0009507 chloroplast; GO:0009536 plastid; GO:0015935 small ribosomal subunit; GO:0016020 membrane; GO:0022626 cytosolic ribosome; GO:0022627 cytosolic …	GO:0003676 nucleic acid binding; GO:0003723 RNA binding; GO:0003729 mRNA binding; GO:0003735 structural constituent of ribosome; GO:0005198 structural molecule activity; GO:0005488 binding; GO:0097159 organic cyclic compound binding; GO:1901363 heterocyclic compound binding;			J	KOG1753	40S ribosomal protein S16
A0A023JGD5	MAF1 OS=Capsicum annuum OX=4072 GN=T459_13043 PE=2 SV=1	T459_13043	15.3	1.015	0.936	0.888	0.928	1.152	1.087	1.082	1.215	1.139	0.927	0.841	0.808	1.009	1.109	1.191	0.739	1.046	0.915	0.896	0.229809	1.334	0.00545248	1.226	0.132422	nucleus				GO:0000278 mitotic cell cycle; GO:0007049 cell cycle; GO:0007275 multicellular organism development; GO:0009791 post-embryonic development; GO:0009987 cellular process; GO:0022622 root system development; GO:0032501 multicellular organismal process; GO:0032502 developmental process; GO:0048364 root development; GO:0048527 lateral root development; GO:0048528 post-embryonic root development; GO:00…	GO:0005622 intracellular; GO:0005623 cell; GO:0005634 nucleus; GO:0005635 nuclear envelope; GO:0005640 nuclear outer membrane; GO:0005737 cytoplasm; GO:0005794 Golgi apparatus; GO:0005829 cytosol; GO:0005886 plasma membrane; GO:0012505 endomembrane system; GO:0016020 membrane; GO:0016363 nuclear matrix; GO:0019867 outer membrane; GO:0031090 organelle membrane; GO:0031965 nuclear membrane; GO:0031…		PF13943	WPP domain
A0A2G2ZM25	Protein CER1-like 2 OS=Capsicum annuum OX=4072 GN=T459_11480 PE=4 SV=1	T459_11480	43.1	0.83	0.827	0.831	1.188	1.166	1.168	0.839	0.884	0.783	1.226	1.186	1.155	0.834	0.841	0.789	1.169	1.153	1.141	0.706	5.83211e-07	0.703	0.000828669	0.712	8.80487e-05	nucleus	K15404	K15404, CER1; aldehyde decarbonylase [EC:4.1.99.5]	map00073 Cutin, suberine and wax biosynthesis; map01110 Biosynthesis of secondary metabolites				PF12076	WAX2 C-terminal domain
Q6RJY8	Putative lesion-inducing protein OS=Capsicum annuum OX=4072 GN=T459_16638 PE=2 SV=1	T459_16638	17.3	0.993	0.892	0.86	1.074	1.068	1.122	1	0.956	0.919	1.054	1.073	1.004	0.999	0.953	0.962	1.049	1.022	1.023	0.841	0.0189419	0.918	0.0531122	0.942	0.0230017	plasma membrane
A0A2G2Z9Q2	Putative staphylococcal-like nuclease CAN1 OS=Capsicum annuum OX=4072 GN=T459_16789 PE=4 SV=1	T459_16789	37.1	1.085	1.044	1.048	0.972	0.899	0.958	0.88	0.929	0.903	1.07	1.162	1.059							1.123	0.0124035	0.824	0.00440549			nucleus				GO:0006139 nucleobase-containing compound metabolic process; GO:0006401 RNA catabolic process; GO:0006725 cellular aromatic compound metabolic process; GO:0006807 nitrogen compound metabolic process; GO:0008152 metabolic process; GO:0009056 catabolic process; GO:0009057 macromolecule catabolic process; GO:0009987 cellular process; GO:0016070 RNA metabolic process; GO:0019439 aromatic compound cat…	GO:0005622 intracellular; GO:0005623 cell; GO:0005634 nucleus; GO:0005737 cytoplasm; GO:0043226 organelle; GO:0043227 membrane-bounded organelle; GO:0043229 intracellular organelle; GO:0043231 intracellular membrane-bounded organelle;	GO:0003824 catalytic activity; GO:0004518 nuclease activity; GO:0016787 hydrolase activity; GO:0016788 hydrolase activity, acting on ester bonds;	PF00565	Staphylococcal nuclease homologue
A0A1U8GX11	Elongation factor 1-alpha OS=Capsicum annuum OX=4072 GN=T459_16486 PE=3 SV=1	T459_16486	49.2	0.99	0.995	1.006	0.983	1.118	0.984	1.024	1.042	1.006	0.965	0.966	0.976	1.093	1.032	1.042	0.967	0.989	0.921	0.97	0.535376	1.057	0.00690968	1.101	0.0250212	cytoplasm	K03231	EEF1A; elongation factor 1-alpha	map03013 RNA transport	GO:0006412 translation; GO:0006414 translational elongation; GO:0006518 peptide metabolic process; GO:0006807 nitrogen compound metabolic process; GO:0008152 metabolic process; GO:0009058 biosynthetic process; GO:0009059 macromolecule biosynthetic process; GO:0009987 cellular process; GO:0010467 gene expression; GO:0019538 protein metabolic process; GO:0034641 cellular nitrogen compound metabolic…	GO:0005622 intracellular; GO:0005623 cell; GO:0005737 cytoplasm;	GO:0003676 nucleic acid binding; GO:0003723 RNA binding; GO:0003746 translation elongation factor activity; GO:0003824 catalytic activity; GO:0003924 GTPase activity; GO:0005488 binding; GO:0008135 translation factor activity, RNA binding; GO:0016462 pyrophosphatase activity; GO:0016787 hydrolase activity; GO:0016817 hydrolase activity, acting on acid anhydrides; GO:0016818 hydrolase activity, ac…	PF00009; PF03144; PF03143	Elongation factor Tu GTP binding domain; Elongation factor Tu domain 2; Elongation factor Tu C-terminal domain	J	KOG0052	Translation elongation factor EF-1 alpha/Tu
Q9ATJ3	Hydroxycinnamoyl-CoA: serotonin N-(Hydroxycinnamoyl)transferase OS=Capsicum annuum OX=4072 GN=CASHT PE=2 SV=1	CASHT	28.2							0.955	0.963	0.829	1.067	1.122	1.069	1.058	0.986	0.944	1.013	0.989	1.018			0.843	0.0281951	0.989	0.751234	cytoplasm	K22246	THT; tyramine N-feruloyltransferase [EC:2.3.1.110]							E	KOG3216	Diamine acetyltransferase
B5LAU5	3-hydroxyacyl-[acyl-carrier-protein] dehydratase FabZ OS=Capsicum annuum OX=4072 GN=T459_32044 PE=2 SV=1	T459_32044	24	0.954	0.972	0.944	1.07	1.05	1.038	1.032	1.044	1.045	0.966	0.948	0.958	1.12	1.112	1.116	0.898	0.892	0.858	0.909	0.00147772	1.087	0.000251915	1.264	8.18096e-05	chloroplast	K02372	fabZ; 3-hydroxyacyl-[acyl-carrier-protein] dehydratase [EC:4.2.1.59]	map00061 Fatty acid biosynthesis; map00780 Biotin metabolism; map01100 Metabolic pathways; map01212 Fatty acid metabolism				PF07977	FabA-like domain
A0A1U8E1T0	Histone H4 OS=Capsicum annuum OX=4072 GN=T459_01439 PE=3 SV=1	T459_01439	11.4	1.026	1.025	1.06	0.989	0.966	0.939	1.037	1.027	1.038	1.006	0.965	0.936	1.08	1.112	1.062	0.88	0.93	0.948	1.075	0.0177067	1.067	0.036717	1.18	0.00313099	nucleus	K11254	H4; histone H4		GO:0006323 DNA packaging; GO:0006325 chromatin organization; GO:0006333 chromatin assembly or disassembly; GO:0006334 nucleosome assembly; GO:0006996 organelle organization; GO:0009987 cellular process; GO:0016043 cellular component organization; GO:0022607 cellular component assembly; GO:0031497 chromatin assembly; GO:0034622 cellular protein-containing complex assembly; GO:0034728 nucleosome or…	GO:0000228 nuclear chromosome; GO:0000785 chromatin; GO:0000786 nucleosome; GO:0000788 nuclear nucleosome; GO:0000790 nuclear chromatin; GO:0005622 intracellular; GO:0005623 cell; GO:0005634 nucleus; GO:0005694 chromosome; GO:0031974 membrane-enclosed lumen; GO:0031981 nuclear lumen; GO:0032991 protein-containing complex; GO:0032993 protein-DNA complex; GO:0043226 organelle; GO:0043227 membrane-b…	GO:0003676 nucleic acid binding; GO:0003677 DNA binding; GO:0005488 binding; GO:0005515 protein binding; GO:0042393 histone binding; GO:0097159 organic cyclic compound binding; GO:1901363 heterocyclic compound binding;			B	KOG3467	Histone H4
A0A023JGD8	Stress-induced protein 21 OS=Capsicum annuum OX=4072 GN=T459_12390 PE=2 SV=1	T459_12390	37.7	0.984	0.964	0.94	1.032	1.043	1.021	1.138	1.01	1.126	0.894	0.96	0.926	1.08	1.051	1.025	0.962	0.954	0.974	0.933	0.00880082	1.178	0.0199092	1.092	0.00566957	nucleus	K20557	VIP1; transcription factor VIP1	map04016 MAPK signaling pathway - plant
Q2HPE5	CAPIP2 OS=Capsicum annuum OX=4072 GN=CAPIP2 PE=2 SV=1	CAPIP2	21.8	1.05	0.997	1.034	0.971	0.981	0.986	1.029	1.031	1.044	0.966	0.961	0.973	1.047	1.128	1.151	0.915	0.839	0.872	1.049	0.0417376	1.07	0.000301008	1.267	0.00347762	chloroplast							PF06232	Embryo-specific protein 3, (ATS3)
A0A2G2XTT1	Helicase ATP-binding domain-containing protein OS=Capsicum annuum OX=4072 GN=T459_23291 PE=4 SV=1	T459_23291	10.3	0.972	1.054	0.947	1.071	0.938	1.025	1.028	0.954	1.027	1.01	1.05	0.939	0.936	0.901	0.909	1.266	0.97	1.024	0.98	0.714844	1.003	0.9309	0.842	0.114797	mitochondria	K12823	DDX5, DBP2; ATP-dependent RNA helicase DDX5/DBP2 [EC:3.6.4.13]	map03040 Spliceosome						A	KOG0331	ATP-dependent RNA helicase
A0A075W1C1	ATP synthase protein MI25 OS=Capsicum annuum OX=4072 GN=orf25 PE=4 SV=1	orf25	22	1.13	1.16	1.12	0.858	0.868	0.94	0.928	0.96	0.912	1.114	1.046	1.042	0.848	0.852	0.817	1.133	1.159	1.162	1.279	0.00127646	0.874	0.00710182	0.729	3.40038e-05	chloroplast									C	KOG4669	NADH dehydrogenase subunit 4L and related proteins
Q2VT56	Probable glutathione-S-transferase OS=Capsicum annuum OX=4072 GN=T459_23080 PE=2 SV=1	T459_23080	25.4	1.01	1.077	0.999	0.977	0.952	0.97	1.004	1.007	0.999	0.952	1.038	1.061							1.065	0.0659248	0.987	0.726488			cytoplasm	K00799	GST, gst; glutathione S-transferase [EC:2.5.1.18]	map00480 Glutathione metabolism; map01100 Metabolic pathways	GO:0001101 response to acid chemical; GO:0006518 peptide metabolic process; GO:0006575 cellular modified amino acid metabolic process; GO:0006749 glutathione metabolic process; GO:0006790 sulfur compound metabolic process; GO:0006807 nitrogen compound metabolic process; GO:0006950 response to stress; GO:0008152 metabolic process; GO:0009056 catabolic process; GO:0009266 response to temperature st…	GO:0005622 intracellular; GO:0005623 cell; GO:0005737 cytoplasm;	GO:0003824 catalytic activity; GO:0004364 glutathione transferase activity; GO:0016740 transferase activity; GO:0016765 transferase activity, transferring alkyl or aryl (other than methyl) groups;	PF02798; PF00043	Glutathione S-transferase, N-terminal domain; Glutathione S-transferase, C-terminal domain	O	KOG0406	Glutathione S-transferase
K7QJC5	1,2-dihydroxy-3-keto-5-methylthiopentene dioxygenase OS=Capsicum annuum OX=4072 GN=ARD PE=2 SV=1	ARD	23.4	0.964	0.97	0.962	1.04	1.049	1.022	1.024	1.05	1.028	0.953	0.942	0.983	1.092	1.104	1.078	0.881	0.919	0.888	0.931	0.000890597	1.078	0.00731829	1.218	0.000177005	cytoplasm	K08967	mtnD, mtnZ, ADI1; 1,2-dihydroxy-3-keto-5-methylthiopentene dioxygenase [EC:1.13.11.53 1.13.11.54]	map00270 Cysteine and methionine metabolism; map01100 Metabolic pathways	GO:0000096 sulfur amino acid metabolic process; GO:0006082 organic acid metabolic process; GO:0006520 cellular amino acid metabolic process; GO:0006555 methionine metabolic process; GO:0006790 sulfur compound metabolic process; GO:0006807 nitrogen compound metabolic process; GO:0008152 metabolic process; GO:0009066 aspartate family amino acid metabolic process; GO:0009987 cellular process; GO:001…		GO:0003824 catalytic activity; GO:0005488 binding; GO:0005506 iron ion binding; GO:0010297 heteropolysaccharide binding; GO:0010309 acireductone dioxygenase [iron(II)-requiring] activity; GO:0016491 oxidoreductase activity; GO:0016701 oxidoreductase activity, acting on single donors with incorporation of molecular oxygen; GO:0016702 oxidoreductase activity, acting on single donors with incorporat…	PF03079	ARD/ARD' family	E	KOG2107	Uncharacterized conserved protein, contains double-stranded beta-helix domain
A0A2G3AIM5	DNA-directed RNA polymerase subunit beta OS=Capsicum annuum OX=4072 GN=T459_01964 PE=4 SV=1	T459_01964	38.7	0.986	1.065	1.221	0.908	0.895	0.929													1.198	0.0496735					cytoplasm	K03046	rpoC; DNA-directed RNA polymerase subunit beta' [EC:2.7.7.6]	map03020 RNA polymerase		GO:0000428 DNA-directed RNA polymerase complex; GO:0005622 intracellular; GO:0005623 cell; GO:0005634 nucleus; GO:0005730 nucleolus; GO:0005736 RNA polymerase I complex; GO:0005737 cytoplasm; GO:0009507 chloroplast; GO:0009536 plastid; GO:0030880 RNA polymerase complex; GO:0031974 membrane-enclosed lumen; GO:0031981 nuclear lumen; GO:0032991 protein-containing complex; GO:0043226 organelle; GO:00…		PF00623	RNA polymerase Rpb1, domain 2
J7H721	30S ribosomal protein S15, chloroplastic OS=Capsicum annuum OX=4072 GN=rps15 PE=3 SV=1	rps15	10.4	0.976	1.038	1.036	0.992	0.989	0.974													1.032	0.210632					cytoplasm,nucleus	K02956	RP-S15, MRPS15, rpsO; small subunit ribosomal protein S15	map03010 Ribosome		GO:0000312 plastid small ribosomal subunit; GO:0000313 organellar ribosome; GO:0000314 organellar small ribosomal subunit; GO:0005622 intracellular; GO:0005623 cell; GO:0005737 cytoplasm; GO:0005840 ribosome; GO:0009507 chloroplast; GO:0009532 plastid stroma; GO:0009536 plastid; GO:0009547 plastid ribosome; GO:0009570 chloroplast stroma; GO:0015935 small ribosomal subunit; GO:0032991 protein-cont…		PF00312	Ribosomal protein S15	J	KOG2815	Mitochondrial/choloroplast ribosomal protein S15
A0A1U8GKB4	Histone H3 OS=Capsicum annuum OX=4072 GN=T459_12717 PE=3 SV=1	T459_12717	15.4	1.087	1.069	1.063	0.97	0.944	0.873	1.184	1.009	1.048	0.888	0.91	0.971	1.07	1.136	1.169	0.887	0.963	0.787	1.155	0.0108826	1.17	0.047564	1.28	0.0176877	nucleus	K11253	H3; histone H3		GO:0006323 DNA packaging; GO:0006325 chromatin organization; GO:0006333 chromatin assembly or disassembly; GO:0006334 nucleosome assembly; GO:0006996 organelle organization; GO:0009987 cellular process; GO:0016043 cellular component organization; GO:0022607 cellular component assembly; GO:0031497 chromatin assembly; GO:0034622 cellular protein-containing complex assembly; GO:0034728 nucleosome or…	GO:0000785 chromatin; GO:0000786 nucleosome; GO:0005622 intracellular; GO:0005623 cell; GO:0005634 nucleus; GO:0005694 chromosome; GO:0032991 protein-containing complex; GO:0032993 protein-DNA complex; GO:0043226 organelle; GO:0043227 membrane-bounded organelle; GO:0043228 non-membrane-bounded organelle; GO:0043229 intracellular organelle; GO:0043231 intracellular membrane-bounded organelle; GO:0…	GO:0003676 nucleic acid binding; GO:0003677 DNA binding; GO:0003682 chromatin binding; GO:0005488 binding; GO:0031490 chromatin DNA binding; GO:0031491 nucleosome binding; GO:0031492 nucleosomal DNA binding; GO:0044877 protein-containing complex binding; GO:0097159 organic cyclic compound binding; GO:1901363 heterocyclic compound binding;	PF00125	Core histone H2A/H2B/H3/H4	B	KOG1745	Histones H3 and H4
A0A1U8E9M2	40S ribosomal protein S28 OS=Capsicum annuum OX=4072 GN=T459_32756 PE=3 SV=1	T459_32756	7.5	1.059	0.997	1.055	0.934	1.002	0.958	1.209	1.185	1.155	0.806	0.828	0.83	1.186	1.138	1.172	0.82	0.797	0.901	1.075	0.0630715	1.44	2.31824e-05	1.388	0.00108127	cytoplasm	K02979	RP-S28e, RPS28; small subunit ribosomal protein S28e	map03010 Ribosome		GO:0005622 intracellular; GO:0005623 cell; GO:0005737 cytoplasm;				J	KOG3502	40S ribosomal protein S28
Q6RJX7	Induced stolon tip protein LRP OS=Capsicum annuum OX=4072 GN=T459_26393 PE=2 SV=1	T459_26393	11.1	1.158	0.977	1.042	0.943	0.868	1.019													1.123	0.164215					cytoplasm				GO:0006464 cellular protein modification process; GO:0006468 protein phosphorylation; GO:0006793 phosphorus metabolic process; GO:0006796 phosphate-containing compound metabolic process; GO:0006807 nitrogen compound metabolic process; GO:0007154 cell communication; GO:0007165 signal transduction; GO:0007166 cell surface receptor signaling pathway; GO:0007167 enzyme linked receptor protein signali…	GO:0005623 cell; GO:0005886 plasma membrane; GO:0016020 membrane; GO:0071944 cell periphery;	GO:0003824 catalytic activity; GO:0004672 protein kinase activity; GO:0004674 protein serine/threonine kinase activity; GO:0004675 transmembrane receptor protein serine/threonine kinase activity; GO:0004888 transmembrane signaling receptor activity; GO:0016301 kinase activity; GO:0016740 transferase activity; GO:0016772 transferase activity, transferring phosphorus-containing groups; GO:0016773 p…			S	KOG0619	FOG: Leucine rich repeat
Q39467	Sn-2 protein OS=Capsicum annuum OX=4072 GN=Sn-2 PE=4 SV=1	Sn-2	16.7	1.113	0.998	1.074	0.901	0.952	0.967	1.121	1.088	1.137	0.895	0.89	0.881	1.31	1.227	1.233	0.78	0.728	0.738	1.129	0.0349106	1.255	7.94382e-05	1.679	6.43533e-05	cytoplasm					GO:0005622 intracellular; GO:0005623 cell; GO:0005737 cytoplasm; GO:0009507 chloroplast; GO:0009536 plastid; GO:0043226 organelle; GO:0043227 membrane-bounded organelle; GO:0043229 intracellular organelle; GO:0043231 intracellular membrane-bounded organelle;		PF00407	Pathogenesis-related protein Bet v I family
Q9LM08	Pepper esterase OS=Capsicum annuum OX=4072 GN=PepEST PE=2 SV=1	PepEST	36.5	1.173	1.111	1.131	0.8	0.859	0.931	1.101	0.919	1.058	0.92	0.891	1.118	1.047	1.03	1.078	0.936	0.904	1.015	1.319	0.00396426	1.051	0.594326	1.105	0.0517912	cytoplasm							PF07859	alpha/beta hydrolase fold	V	KOG1515	Arylacetamide deacetylase
I3WWC8	Chalcone synthase OS=Capsicum annuum OX=4072 GN=T459_15321 PE=2 SV=1	T459_15321	44.3	1.02	0.991	1.025	0.993	1.042	0.935	0.995	0.963	0.858	1.052	1.01	1.128	1.022	0.933	0.907	1.018	0.985	1.045	1.022	0.527527	0.883	0.0855823	0.939	0.183846	cytoplasm	K00660	CHS; chalcone synthase [EC:2.3.1.74]	map00941 Flavonoid biosynthesis; map01100 Metabolic pathways; map01110 Biosynthesis of secondary metabolites; map04712 Circadian rhythm - plant	GO:0008152 metabolic process; GO:0009058 biosynthetic process; GO:0009812 flavonoid metabolic process; GO:0009813 flavonoid biosynthetic process; GO:0071704 organic substance metabolic process; GO:1901576 organic substance biosynthetic process;		GO:0003824 catalytic activity; GO:0016210 naringenin-chalcone synthase activity; GO:0016740 transferase activity; GO:0016746 transferase activity, transferring acyl groups; GO:0016747 transferase activity, transferring acyl groups other than amino-acyl groups;	PF00195; PF02797	Chalcone and stilbene synthases, N-terminal domain; Chalcone and stilbene synthases, C-terminal domain
A0A2G2XTU5	DCD domain-containing protein OS=Capsicum annuum OX=4072 GN=T459_32908 PE=4 SV=1	T459_32908	68.6	0.978	1.011	1.016	0.969	1.015	0.989	1	0.964	1.066	0.988	1.01	0.978	0.981	1.056	1.003	1.003	0.986	0.98	1.011	0.582381	1.018	0.607166	1.024	0.368249	nucleus							PF10539	Development and cell death domain
S5U252	ER luminal-binding protein OS=Capsicum annuum OX=4072 GN=BLP5 PE=2 SV=1	BLP5	73.5	0.94	0.932	0.927	1.086	1.054	1.066	1.01	0.992	0.994	0.995	1.014	1.005	1.014	1.02	1	0.998	0.971	0.964	0.873	0.000146298	0.994	0.489689	1.034	0.0483526	endoplasmic reticulum	K09490	HSPA5, BIP; heat shock 70kDa protein 5	map03060 Protein export; map04141 Protein processing in endoplasmic reticulum	GO:0006508 proteolysis; GO:0006511 ubiquitin-dependent protein catabolic process; GO:0006807 nitrogen compound metabolic process; GO:0006950 response to stress; GO:0008152 metabolic process; GO:0009056 catabolic process; GO:0009057 macromolecule catabolic process; GO:0009719 response to endogenous stimulus; GO:0009725 response to hormone; GO:0009735 response to cytokinin; GO:0009987 cellular proc…	GO:0005618 cell wall; GO:0005622 intracellular; GO:0005623 cell; GO:0005634 nucleus; GO:0005654 nucleoplasm; GO:0005730 nucleolus; GO:0005737 cytoplasm; GO:0005773 vacuole; GO:0005774 vacuolar membrane; GO:0005783 endoplasmic reticulum; GO:0005794 Golgi apparatus; GO:0005829 cytosol; GO:0005886 plasma membrane; GO:0005911 cell-cell junction; GO:0009506 plasmodesma; GO:0009507 chloroplast; GO:0009…				O	KOG0100	Molecular chaperones GRP78/BiP/KAR2, HSP70 superfamily
Q6RW44	60S ribosomal protein L32 OS=Capsicum annuum OX=4072 GN=T459_05141 PE=2 SV=1	T459_05141	15.6	0.997	1.032	0.992	1.011	0.992	1.008	0.994	0.944	0.974	1.014	1.048	1.051	1.023	0.991	0.992	0.987	0.999	0.97	1.003	0.827644	0.935	0.0241258	1.017	0.282383	cytoplasm	K02912	RP-L32e, RPL32; large subunit ribosomal protein L32e	map03010 Ribosome		GO:0005622 intracellular; GO:0005623 cell; GO:0005634 nucleus; GO:0005730 nucleolus; GO:0005737 cytoplasm; GO:0005829 cytosol; GO:0005840 ribosome; GO:0005844 polysome; GO:0015934 large ribosomal subunit; GO:0022625 cytosolic large ribosomal subunit; GO:0022626 cytosolic ribosome; GO:0031974 membrane-enclosed lumen; GO:0031981 nuclear lumen; GO:0032991 protein-containing complex; GO:0042788 polys…	GO:0003735 structural constituent of ribosome; GO:0005198 structural molecule activity;			J	KOG0878	60S ribosomal protein L32
B5LAW5	Dihydrolipoyl dehydrogenase 2, chloroplastic OS=Capsicum annuum OX=4072 GN=T459_34594 PE=2 SV=1	T459_34594	60.5	0.962	0.973	0.922	1.054	1.045	1.031	0.989	1.021	1.034	0.956	0.965	0.975	1.037	1.037	1.036	0.956	0.943	0.941	0.913	0.00652058	1.051	0.0260534	1.095	5.25384e-05	chloroplast	K00382	DLD, lpd, pdhD; dihydrolipoamide dehydrogenase [EC:1.8.1.4]	map00010 Glycolysis / Gluconeogenesis; map00020 Citrate cycle (TCA cycle); map00260 Glycine, serine and threonine metabolism; map00280 Valine, leucine and isoleucine degradation; map00310 Lysine degradation; map00380 Tryptophan metabolism; map00620 Pyruvate metabolism; map00630 Glyoxylate and dicarboxylate metabolism; map00640 Propanoate metabolism; map01100 Metabolic pathways; map01110 Biosynthe…				PF07992; PF02852	Pyridine nucleotide-disulphide oxidoreductase; Pyridine nucleotide-disulphide oxidoreductase, dimerisation domain	C	KOG1335	Dihydrolipoamide dehydrogenase
B5LAW2	Pyruvate dehydrogenase E1 component subunit alpha OS=Capsicum annuum OX=4072 GN=T459_19252 PE=2 SV=1	T459_19252	47.6	0.946	0.945	0.92	1.053	1.047	1.071	0.988	0.994	0.982	1.001	1.036	0.966	0.965	0.982	0.945	1.009	1.032	1.032	0.886	0.000449229	0.987	0.569775	0.941	0.0105492	chloroplast	K00161	PDHA, pdhA; pyruvate dehydrogenase E1 component alpha subunit [EC:1.2.4.1]	map00010 Glycolysis / Gluconeogenesis; map00020 Citrate cycle (TCA cycle); map00620 Pyruvate metabolism; map01100 Metabolic pathways; map01110 Biosynthesis of secondary metabolites; map01200 Carbon metabolism		GO:0005622 intracellular; GO:0005623 cell; GO:0005737 cytoplasm; GO:0009507 chloroplast; GO:0009526 plastid envelope; GO:0009532 plastid stroma; GO:0009536 plastid; GO:0009570 chloroplast stroma; GO:0009941 chloroplast envelope; GO:0031967 organelle envelope; GO:0031975 envelope; GO:0043226 organelle; GO:0043227 membrane-bounded organelle; GO:0043229 intracellular organelle; GO:0043231 intracellu…				C	KOG0225	Pyruvate dehydrogenase E1, alpha subunit
A0A088D9X5	T-complex protein 1 subunit zeta OS=Capsicum annuum OX=4072 GN=TCP PE=2 SV=1	TCP	58.9	1.004	1.011	0.998	0.998	0.98	1.007	1.004	0.994	0.989	0.984	1.01	1.01	0.97	0.95	0.962	1.037	1.04	1.036	1.009	0.347509	0.994	0.595401	0.926	0.000234855	cytoplasm	K09498	CCT6; T-complex protein 1 subunit zeta		GO:0006457 protein folding; GO:0006458 'de novo' protein folding; GO:0009987 cellular process; GO:0010035 response to inorganic substance; GO:0010038 response to metal ion; GO:0010043 response to zinc ion; GO:0042221 response to chemical; GO:0046686 response to cadmium ion; GO:0050896 response to stimulus; GO:0061077 chaperone-mediated protein folding;	GO:0005622 intracellular; GO:0005623 cell; GO:0005737 cytoplasm; GO:0005829 cytosol; GO:0005832 chaperonin-containing T-complex; GO:0016020 membrane; GO:0032991 protein-containing complex; GO:0101031 chaperone complex;	GO:0005488 binding; GO:0005515 protein binding; GO:0044183 protein folding chaperone; GO:0051082 unfolded protein binding;			O	KOG0359	Chaperonin complex component, TCP-1 zeta subunit (CCT6)
A0A075W230	NADH dehydrogenase [ubiquinone] iron-sulfur protein 3 OS=Capsicum annuum OX=4072 GN=nad9 PE=3 SV=1	nad9	22.6	1.123	1.121	1.097	0.914	0.88	0.886	0.967	0.976	0.966	1.083	1.049	0.987	0.964	1.01	0.974	1.037	1.023	1.09	1.247	9.19097e-05	0.933	0.0656955	0.936	0.0506092	nucleus	K03936	NDUFS3; NADH dehydrogenase (ubiquinone) Fe-S protein 3 [EC:7.1.1.2 1.6.99.3]	map00190 Oxidative phosphorylation; map01100 Metabolic pathways						C	KOG1713	NADH-ubiquinone oxidoreductase, NDUFS3/30 kDa subunit
J7H3V0	30S ribosomal protein S3, chloroplastic OS=Capsicum annuum OX=4072 GN=rps3 PE=3 SV=1	rps3	25.1	1.105	1.321	1.167	0.849	0.785	0.779	1.007	0.95	0.918	0.96	1.044	1.126	0.907	0.95	0.87	1.113	1.098	1.066	1.489	0.00265346	0.919	0.192517	0.832	0.00292059	extracellular	K02982	RP-S3, rpsC; small subunit ribosomal protein S3	map03010 Ribosome	GO:0002181 cytoplasmic translation; GO:0006412 translation; GO:0006518 peptide metabolic process; GO:0006807 nitrogen compound metabolic process; GO:0008152 metabolic process; GO:0009058 biosynthetic process; GO:0009059 macromolecule biosynthetic process; GO:0009987 cellular process; GO:0010467 gene expression; GO:0019538 protein metabolic process; GO:0034641 cellular nitrogen compound metabolic …	GO:0000313 organellar ribosome; GO:0000315 organellar large ribosomal subunit; GO:0005622 intracellular; GO:0005623 cell; GO:0005737 cytoplasm; GO:0005739 mitochondrion; GO:0005759 mitochondrial matrix; GO:0005761 mitochondrial ribosome; GO:0005762 mitochondrial large ribosomal subunit; GO:0005829 cytosol; GO:0005840 ribosome; GO:0009507 chloroplast; GO:0009536 plastid; GO:0015934 large ribosomal…	GO:0003735 structural constituent of ribosome; GO:0005198 structural molecule activity;	PF00189	Ribosomal protein S3, C-terminal domain	J	KOG1711	Mitochondrial/chloroplast ribosomal protein L22
Q8W4V6	Defensin OS=Capsicum annuum OX=4072 GN=T459_19053 PE=2 SV=1	T459_19053	8.7	1.394	1.344	1.416	0.59	0.622	0.636													2.248	7.45936e-06					extracellular				GO:0006950 response to stress; GO:0006952 defense response; GO:0050896 response to stimulus;	GO:0005618 cell wall; GO:0005623 cell; GO:0005886 plasma membrane; GO:0009505 plant-type cell wall; GO:0016020 membrane; GO:0030312 external encapsulating structure; GO:0071944 cell periphery;		PF00304	Gamma-thionin family
A0A2G2WVL9	Protein DETOXIFICATION(predicted) OS=Capsicum annuum OX=4072 GN=T459_24714 PE=4 SV=1	T459_24714	12.2	1.099	1.086	1.11	0.92	0.92	0.87	1.19	1.169	1.063	0.828	0.893	0.871	1.057	1.099	1.113	0.933	0.911	0.898	1.216	0.000572413	1.32	0.00261379	1.192	0.000779514	chloroplast	K03327	TC.MATE, SLC47A, norM, mdtK, dinF; multidrug resistance protein, MATE family		GO:0002229 defense response to oomycetes; GO:0002239 response to oomycetes; GO:0006810 transport; GO:0006855 drug transmembrane transport; GO:0006950 response to stress; GO:0006952 defense response; GO:0009605 response to external stimulus; GO:0009607 response to biotic stimulus; GO:0009636 response to toxic substance; GO:0015893 drug transport; GO:0042221 response to chemical; GO:0042493 respons…		GO:0005215 transporter activity; GO:0022857 transmembrane transporter activity;			V	KOG1347	Uncharacterized membrane protein, predicted efflux pump
B5LAU3	Enoyl-[acyl-carrier-protein] reductase [NADH], chloroplastic OS=Capsicum annuum OX=4072 GN=T459_26635 PE=2 SV=1	T459_26635	41.7	0.934	0.917	0.918	1.065	1.062	1.066	1.016	1.033	1.06	0.944	0.97	0.948	1.046	1.075	1.05	0.914	0.958	0.925	0.867	1.93333e-05	1.086	0.00521346	1.134	0.00159622	chloroplast	K00208	fabI; enoyl-[acyl-carrier protein] reductase I [EC:1.3.1.9 1.3.1.10]	map00061 Fatty acid biosynthesis; map00780 Biotin metabolism; map01100 Metabolic pathways; map01212 Fatty acid metabolism	GO:0006082 organic acid metabolic process; GO:0006629 lipid metabolic process; GO:0006631 fatty acid metabolic process; GO:0006633 fatty acid biosynthetic process; GO:0008152 metabolic process; GO:0008610 lipid biosynthetic process; GO:0009058 biosynthetic process; GO:0009987 cellular process; GO:0016053 organic acid biosynthetic process; GO:0019752 carboxylic acid metabolic process; GO:0032787 m…	GO:0005622 intracellular; GO:0005623 cell; GO:0005737 cytoplasm; GO:0005829 cytosol; GO:0005835 fatty acid synthase complex; GO:0009507 chloroplast; GO:0009526 plastid envelope; GO:0009532 plastid stroma; GO:0009536 plastid; GO:0009570 chloroplast stroma; GO:0009579 thylakoid; GO:0009941 chloroplast envelope; GO:0031967 organelle envelope; GO:0031975 envelope; GO:0032991 protein-containing comple…	GO:0003824 catalytic activity; GO:0005488 binding; GO:0005507 copper ion binding; GO:0016491 oxidoreductase activity; GO:0016627 oxidoreductase activity, acting on the CH-CH group of donors; GO:0016628 oxidoreductase activity, acting on the CH-CH group of donors, NAD or NADP as acceptor; GO:0016631 enoyl-[acyl-carrier-protein] reductase activity; GO:0043167 ion binding; GO:0043169 cation binding;…	PF13561	Enoyl-(Acyl carrier protein) reductase	Q	KOG0725	Reductases with broad range of substrate specificities
X2F617	Heat stress transcription factor A-2b OS=Capsicum annuum OX=4072 GN=HSFA6B PE=2 SV=1	HSFA6B	41.2	0.979	0.953	0.928	1.016	1.072	1.059													0.909	0.0129886					nucleus	K09419	HSFF; heat shock transcription factor, other eukaryote		GO:0006355 regulation of transcription, DNA-templated; GO:0006950 response to stress; GO:0009266 response to temperature stimulus; GO:0009314 response to radiation; GO:0009408 response to heat; GO:0009416 response to light stimulus; GO:0009628 response to abiotic stimulus; GO:0009642 response to light intensity; GO:0009644 response to high light intensity; GO:0009889 regulation of biosynthetic pr…		GO:0003700 DNA-binding transcription factor activity; GO:0005488 binding; GO:0005515 protein binding; GO:0042802 identical protein binding; GO:0140110 transcription regulator activity;	PF00447	HSF-type DNA-binding	K	KOG0627	Heat shock transcription factor
B2CZJ9	PR5-like protein OS=Capsicum annuum OX=4072 GN=T459_00327 PE=2 SV=1	T459_00327	27.1	1.123	1.139	1.1	0.87	0.86	0.887	1.048	0.995	1.105	0.928	0.991	0.969	1.116	1.127	1.138	0.895	0.811	0.881	1.285	5.04235e-05	1.09	0.0754201	1.307	0.000986422	chloroplast				GO:0002376 immune system process; GO:0006950 response to stress; GO:0006952 defense response; GO:0006955 immune response; GO:0006970 response to osmotic stress; GO:0009605 response to external stimulus; GO:0009607 response to biotic stimulus; GO:0009617 response to bacterium; GO:0009620 response to fungus; GO:0009628 response to abiotic stimulus; GO:0009651 response to salt stress; GO:0009814 def…	GO:0005622 intracellular; GO:0005623 cell; GO:0005737 cytoplasm;		PF00314	Thaumatin family
A0A2G2ZEU2	60S ribosomal protein L23 OS=Capsicum annuum OX=4072 GN=T459_15820 PE=3 SV=1	T459_15820	13.4	0.984	0.99	0.998	0.994	0.996	1.034	0.963	0.948	0.96	1.032	1.038	1.065	1.044	1.076	1.002	0.974	0.986	0.981	0.983	0.270667	0.916	0.00123854	1.062	0.047304	cytoplasm	K02894	RP-L23e, RPL23; large subunit ribosomal protein L23e	map03010 Ribosome				PF00238	Ribosomal protein L14p/L23e	J	KOG0901	60S ribosomal protein L14/L17/L23
Q9M517	TMV-induced protein I OS=Capsicum annuum OX=4072 GN=TinI PE=2 SV=1	TinI	19.8	1.051	1.104	1.04	0.95	0.908	0.953	1.102	1.072	1.103	0.906	0.936	0.89	1.108	1.112	1.105	0.908	0.906	0.875	1.137	0.00608854	1.199	0.000479264	1.237	6.23766e-05	chloroplast				GO:0001101 response to acid chemical; GO:0006950 response to stress; GO:0006970 response to osmotic stress; GO:0009266 response to temperature stimulus; GO:0009409 response to cold; GO:0009414 response to water deprivation; GO:0009415 response to water; GO:0009628 response to abiotic stimulus; GO:0009651 response to salt stress; GO:0010035 response to inorganic substance; GO:0042221 response to c…	GO:0005622 intracellular; GO:0005623 cell; GO:0005737 cytoplasm; GO:0005773 vacuole; GO:0005774 vacuolar membrane; GO:0005783 endoplasmic reticulum; GO:0005886 plasma membrane; GO:0009507 chloroplast; GO:0009534 chloroplast thylakoid; GO:0009535 chloroplast thylakoid membrane; GO:0009536 plastid; GO:0009579 thylakoid; GO:0012505 endomembrane system; GO:0016020 membrane; GO:0031090 organelle membr…		PF01477	PLAT/LH2 domain
A0A1U8DSX2	Mitogen-activated protein kinase OS=Capsicum annuum OX=4072 GN=MAPK4-2 PE=2 SV=1	MAPK4-2	42.9	0.966	1.007	1.002	1.041	1.071	1.009	0.953	0.967	0.992	0.993	0.999	1.024	0.979	0.98	0.986	1	1.026	1.035	0.953	0.0918202	0.966	0.0795235	0.962	0.021801	cytoplasm	K20600	MPK4; mitogen-activated protein kinase 4 [EC:2.7.11.24]	map04016 MAPK signaling pathway - plant; map04626 Plant-pathogen interaction	GO:0000003 reproduction; GO:0000165 MAPK cascade; GO:0000226 microtubule cytoskeleton organization; GO:0000278 mitotic cell cycle; GO:0000280 nuclear division; GO:0000281 mitotic cytokinesis; GO:0000910 cytokinesis; GO:0000911 cytokinesis by cell plate formation; GO:0001101 response to acid chemical; GO:0002376 immune system process; GO:0006464 cellular protein modification process; GO:0006468 pr…	GO:0005622 intracellular; GO:0005623 cell; GO:0005634 nucleus; GO:0005737 cytoplasm; GO:0005829 cytosol; GO:0005856 cytoskeleton; GO:0009504 cell plate; GO:0043226 organelle; GO:0043227 membrane-bounded organelle; GO:0043228 non-membrane-bounded organelle; GO:0043229 intracellular organelle; GO:0043231 intracellular membrane-bounded organelle; GO:0043232 intracellular non-membrane-bounded organel…	GO:0003824 catalytic activity; GO:0004672 protein kinase activity; GO:0004674 protein serine/threonine kinase activity; GO:0004707 MAP kinase activity; GO:0016301 kinase activity; GO:0016740 transferase activity; GO:0016772 transferase activity, transferring phosphorus-containing groups; GO:0016773 phosphotransferase activity, alcohol group as acceptor; GO:0140096 catalytic activity, acting on a …	PF00069	Protein kinase domain	T	KOG0660	Mitogen-activated protein kinase
Q6S021	Eukaryotic translation initiation factor 5A OS=Capsicum annuum OX=4072 GN=eIF5A2 PE=2 SV=1	eIF5A2	17.4	0.99	0.973	0.948	1.044	1.039	1.051	1.081	1.064	0.998	0.95	0.956	0.955	1.022	1	1.01	1.04	0.977	0.942	0.929	0.00475435	1.099	0.0188859	1.025	0.442672	cytoplasm	K03263	EIF5A; translation initiation factor 5A					PF01287	Eukaryotic elongation factor 5A hypusine, DNA-binding OB fold	J	KOG3271	Translation initiation factor 5A (eIF-5A)
Q2TPB3	Eukaryotic translation initiation factor 4E OS=Capsicum annuum OX=4072 GN=T459_11130 PE=2 SV=1	T459_11130	25.9	1.03	0.996	0.912	0.991	1.059	1.065	1.007	1.023	1.165	0.913	0.978	0.921	1.086	0.988	1.009	1.016	1.025	0.933	0.943	0.240337	1.136	0.0688647	1.037	0.43381	cytoplasm	K03259	EIF4E; translation initiation factor 4E	map03013 RNA transport	GO:0009605 response to external stimulus; GO:0009607 response to biotic stimulus; GO:0009615 response to virus; GO:0043207 response to external biotic stimulus; GO:0050896 response to stimulus; GO:0051704 multi-organism process; GO:0051707 response to other organism;	GO:0000932 P-body; GO:0005622 intracellular; GO:0005623 cell; GO:0005634 nucleus; GO:0005730 nucleolus; GO:0005737 cytoplasm; GO:0005845 mRNA cap binding complex; GO:0010494 cytoplasmic stress granule; GO:0031974 membrane-enclosed lumen; GO:0031981 nuclear lumen; GO:0032991 protein-containing complex; GO:0034518 RNA cap binding complex; GO:0035770 ribonucleoprotein granule; GO:0036464 cytoplasmic…		PF01652	Eukaryotic initiation factor 4E	J	KOG1670	Translation initiation factor 4F, cap-binding subunit (eIF-4E) and related cap-binding proteins
B5LAV7	Long chain acyl-CoA synthetase 9, chloroplastic OS=Capsicum annuum OX=4072 GN=T459_19479 PE=2 SV=1	T459_19479	79.8	1.095	1.088	1.032	0.919	0.993	0.902	0.96	0.936	0.979	1.044	1.047	0.998	0.846	0.95	0.908	1.105	1.124	1.072	1.143	0.0185906	0.931	0.0239594	0.819	0.00534327	chloroplast	K01897	ACSL, fadD; long-chain acyl-CoA synthetase [EC:6.2.1.3]	map00061 Fatty acid biosynthesis; map00071 Fatty acid degradation; map01100 Metabolic pathways; map01212 Fatty acid metabolism; map04146 Peroxisome	GO:0001676 long-chain fatty acid metabolic process; GO:0006082 organic acid metabolic process; GO:0006629 lipid metabolic process; GO:0006631 fatty acid metabolic process; GO:0008152 metabolic process; GO:0009987 cellular process; GO:0019752 carboxylic acid metabolic process; GO:0032787 monocarboxylic acid metabolic process; GO:0043436 oxoacid metabolic process; GO:0044237 cellular metabolic proc…	GO:0005622 intracellular; GO:0005623 cell; GO:0005737 cytoplasm; GO:0005783 endoplasmic reticulum; GO:0005794 Golgi apparatus; GO:0009507 chloroplast; GO:0009526 plastid envelope; GO:0009536 plastid; GO:0009941 chloroplast envelope; GO:0012505 endomembrane system; GO:0031967 organelle envelope; GO:0031975 envelope; GO:0043226 organelle; GO:0043227 membrane-bounded organelle; GO:0043229 intracellu…	GO:0003824 catalytic activity; GO:0004467 long-chain fatty acid-CoA ligase activity; GO:0015645 fatty acid ligase activity; GO:0016405 CoA-ligase activity; GO:0016874 ligase activity; GO:0016877 ligase activity, forming carbon-sulfur bonds; GO:0016878 acid-thiol ligase activity;			I	KOG1180	Acyl-CoA synthetase
A0A1U8E1Q7	MAP kinase kinase 2-1 OS=Capsicum annuum OX=4072 GN=MAPKK2-1 PE=2 SV=1	MAPKK2-1	39.4	0.99	0.962	1.012	0.999	1.03	1.037	0.964	0.99	0.96	0.988	1.012	1.014	1.043	0.993	0.989	1.025	0.943	1.026	0.967	0.142771	0.967	0.0571142	1.01	0.758633	cytoplasm	K20603	MKK2; mitogen-activated protein kinase kinase 2 [EC:2.7.12.2]	map04016 MAPK signaling pathway - plant	GO:0000165 MAPK cascade; GO:0000187 activation of MAPK activity; GO:0000302 response to reactive oxygen species; GO:0001101 response to acid chemical; GO:0001932 regulation of protein phosphorylation; GO:0001934 positive regulation of protein phosphorylation; GO:0002237 response to molecule of bacterial origin; GO:0002376 immune system process; GO:0003002 regionalization; GO:0006464 cellular prot…	GO:0005622 intracellular; GO:0005623 cell; GO:0005737 cytoplasm; GO:0005886 plasma membrane; GO:0016020 membrane; GO:0071944 cell periphery;	GO:0003824 catalytic activity; GO:0004672 protein kinase activity; GO:0004674 protein serine/threonine kinase activity; GO:0004708 MAP kinase kinase activity; GO:0004712 protein serine/threonine/tyrosine kinase activity; GO:0016301 kinase activity; GO:0016740 transferase activity; GO:0016772 transferase activity, transferring phosphorus-containing groups; GO:0016773 phosphotransferase activity, a…	PF00069	Protein kinase domain	T	KOG0581	Mitogen-activated protein kinase kinase (MAP2K)
J7HAV1	Photosystem I iron-sulfur center OS=Capsicum annuum OX=4072 GN=psaC PE=3 SV=1	psaC	9	0.994	0.979	0.972	1.053	0.966	1.021	0.979	1.017	0.998	1.013	0.992	1.01	1.115	1.056	1.078	0.907	0.901	0.951	0.969	0.298117	0.993	0.610072	1.178	0.00215156	chloroplast	K02691	psaC; photosystem I subunit VII	map00195 Photosynthesis; map01100 Metabolic pathways	GO:0008152 metabolic process; GO:0009987 cellular process; GO:0015979 photosynthesis; GO:0044237 cellular metabolic process;	GO:0005622 intracellular; GO:0005623 cell; GO:0005737 cytoplasm; GO:0009507 chloroplast; GO:0009521 photosystem; GO:0009522 photosystem I; GO:0009532 plastid stroma; GO:0009533 chloroplast stromal thylakoid; GO:0009534 chloroplast thylakoid; GO:0009535 chloroplast thylakoid membrane; GO:0009536 plastid; GO:0009570 chloroplast stroma; GO:0009579 thylakoid; GO:0016020 membrane; GO:0031976 plastid t…
Q5J0W3	Lipocalin protein OS=Capsicum annuum OX=4072 GN=T459_24503 PE=2 SV=1	T459_24503	21.3	0.906	0.943	0.973	1.09	0.968	1.125	1.035	1.1	1.004	0.986	0.895	0.989	1.167	1.126	1.114	0.88	0.868	0.859	0.887	0.0772005	1.094	0.101127	1.307	6.95437e-05	cytoplasm	K03098	APOD; apolipoprotein D and lipocalin family protein		GO:0000003 reproduction; GO:0001101 response to acid chemical; GO:0003006 developmental process involved in reproduction; GO:0006873 cellular ion homeostasis; GO:0006875 cellular metal ion homeostasis; GO:0006883 cellular sodium ion homeostasis; GO:0006950 response to stress; GO:0006970 response to osmotic stress; GO:0006972 hyperosmotic response; GO:0007275 multicellular organism development; GO…	GO:0005622 intracellular; GO:0005623 cell; GO:0005737 cytoplasm; GO:0005739 mitochondrion; GO:0005773 vacuole; GO:0005774 vacuolar membrane; GO:0005783 endoplasmic reticulum; GO:0005794 Golgi apparatus; GO:0005886 plasma membrane; GO:0005911 cell-cell junction; GO:0009506 plasmodesma; GO:0009507 chloroplast; GO:0009526 plastid envelope; GO:0009536 plastid; GO:0009898 cytoplasmic side of plasma me…		PF08212	Lipocalin-like domain	M	KOG4824	Apolipoprotein D/Lipocalin
Q94KB0	Importin subunit alpha OS=Capsicum annuum OX=4072 GN=T459_33094 PE=2 SV=1	T459_33094	59.3	1	0.965	1.001	1.002	1.014	1.019	0.957	0.94	1.009	1.034	1.008	1.032	0.879	0.961	0.877	1.054	1.096	1.089	0.977	0.150954	0.945	0.0679425	0.839	0.0055493	nucleus	K15042	KPNA1_5_6; importin subunit alpha-5/6/7		GO:0006606 protein import into nucleus; GO:0006607 NLS-bearing protein import into nucleus; GO:0006810 transport; GO:0006886 intracellular protein transport; GO:0006913 nucleocytoplasmic transport; GO:0008104 protein localization; GO:0009605 response to external stimulus; GO:0009607 response to biotic stimulus; GO:0009608 response to symbiont; GO:0015031 protein transport; GO:0015833 peptide tran…	GO:0005622 intracellular; GO:0005623 cell; GO:0005634 nucleus; GO:0005635 nuclear envelope; GO:0005643 nuclear pore; GO:0005654 nucleoplasm; GO:0005737 cytoplasm; GO:0005829 cytosol; GO:0012505 endomembrane system; GO:0031967 organelle envelope; GO:0031974 membrane-enclosed lumen; GO:0031975 envelope; GO:0031981 nuclear lumen; GO:0032991 protein-containing complex; GO:0043226 organelle; GO:004322…	GO:0005048 signal sequence binding; GO:0005215 transporter activity; GO:0005488 binding; GO:0008139 nuclear localization sequence binding; GO:0033218 amide binding; GO:0042277 peptide binding;			U	KOG0166	Karyopherin (importin) alpha
A0A088DA02	Spermidine synthase OS=Capsicum annuum OX=4072 GN=SPS PE=2 SV=1	SPS	37.6	0.946	0.943	0.961	1.036	1.051	1.031	0.992	1.021	1.018	0.97	1.023	0.98	1.034	1.096	1.007	0.957	0.973	0.942	0.914	0.000396195	1.02	0.355601	1.092	0.0303667	cytoplasm	K00797	speE, SRM; spermidine synthase [EC:2.5.1.16]	map00270 Cysteine and methionine metabolism; map00330 Arginine and proline metabolism; map00480 Glutathione metabolism; map01100 Metabolic pathways	GO:0006576 cellular biogenic amine metabolic process; GO:0006595 polyamine metabolic process; GO:0006596 polyamine biosynthetic process; GO:0006807 nitrogen compound metabolic process; GO:0008152 metabolic process; GO:0009058 biosynthetic process; GO:0009308 amine metabolic process; GO:0009309 amine biosynthetic process; GO:0009987 cellular process; GO:0034641 cellular nitrogen compound metabolic…		GO:0003824 catalytic activity; GO:0004766 spermidine synthase activity; GO:0016740 transferase activity; GO:0016765 transferase activity, transferring alkyl or aryl (other than methyl) groups;	PF01564	Spermine/spermidine synthase	H	KOG1562	Spermidine synthase
A0A2G2XJB1	Mitochondrial import inner membrane translocase subunit TIM22-1 OS=Capsicum annuum OX=4072 GN=T459_28518 PE=4 SV=1	T459_28518	17.5	0.964	0.987	0.94	1.019	1.036	1.061							0.987	1.04	0.983	1.068	0.976	0.956	0.928	0.0149407			1.003	0.919181	chloroplast	K17790	TIM22; mitochondrial import inner membrane translocase subunit TIM22		GO:0000003 reproduction; GO:0003006 developmental process involved in reproduction; GO:0007275 multicellular organism development; GO:0008104 protein localization; GO:0009790 embryo development; GO:0009791 post-embryonic development; GO:0009793 embryo development ending in seed dormancy; GO:0010154 fruit development; GO:0022414 reproductive process; GO:0032501 multicellular organismal process; GO…					U	KOG3225	Mitochondrial import inner membrane translocase, subunit TIM22
B5LAS7	Biotin carboxylase OS=Capsicum annuum OX=4072 GN=T459_21137 PE=2 SV=1	T459_21137	58.4	0.958	0.951	0.956	1.031	1.062	1.06	1.008	1.014	1.01	0.96	0.999	1.01	1.043	0.965	1.055	0.97	1	0.99	0.909	0.000621344	1.021	0.243246	1.035	0.318154	chloroplast	K01961	accC; acetyl-CoA carboxylase, biotin carboxylase subunit [EC:6.4.1.2 6.3.4.14]	map00061 Fatty acid biosynthesis; map00620 Pyruvate metabolism; map00640 Propanoate metabolism; map01100 Metabolic pathways; map01110 Biosynthesis of secondary metabolites; map01200 Carbon metabolism; map01212 Fatty acid metabolism				PF00289; PF02786; PF02785	Carbamoyl-phosphate synthase L chain, N-terminal domain; Carbamoyl-phosphate synthase L chain, ATP binding domain; Biotin carboxylase C-terminal domain	EI	KOG0238	3-Methylcrotonyl-CoA carboxylase, biotin-containing subunit/Propionyl-CoA carboxylase, alpha chain/Acetyl-CoA carboxylase, biotin carboxylase subunit
A0A2G3AAW3	Ribulose bisphosphate carboxylase small chain OS=Capsicum annuum OX=4072 GN=T459_06486 PE=3 SV=1	T459_06486	20.4	0.892	0.951	0.874	1.076	1.107	1.107	1.077	0.989	1.014	0.966	0.973	0.989	1.13	1.14	1.174	0.832	0.9	0.837	0.826	0.00211068	1.052	0.129338	1.341	0.000452312	chloroplast	K01602	rbcS; ribulose-bisphosphate carboxylase small chain [EC:4.1.1.39]	map00630 Glyoxylate and dicarboxylate metabolism; map00710 Carbon fixation in photosynthetic organisms; map01100 Metabolic pathways; map01110 Biosynthesis of secondary metabolites; map01200 Carbon metabolism		GO:0005622 intracellular; GO:0005623 cell; GO:0005737 cytoplasm; GO:0009507 chloroplast; GO:0009536 plastid; GO:0043226 organelle; GO:0043227 membrane-bounded organelle; GO:0043229 intracellular organelle; GO:0043231 intracellular membrane-bounded organelle;		PF00101	Ribulose bisphosphate carboxylase, small chain
A0EPI4	ERD15 OS=Capsicum annuum OX=4072 GN=T459_13605 PE=2 SV=1	T459_13605	18.2	0.915	0.975	0.912	1.086	1.059	1.06	1	1.03	0.97	1.02	1.031	0.956	1.011	1.084	1.071	0.987	1.012	0.846	0.874	0.00440093	0.998	0.946804	1.113	0.142015	chloroplast				GO:0001101 response to acid chemical; GO:0006950 response to stress; GO:0009314 response to radiation; GO:0009414 response to water deprivation; GO:0009415 response to water; GO:0009416 response to light stimulus; GO:0009605 response to external stimulus; GO:0009607 response to biotic stimulus; GO:0009617 response to bacterium; GO:0009628 response to abiotic stimulus; GO:0009642 response to light…	GO:0005622 intracellular; GO:0005623 cell; GO:0005737 cytoplasm;
Q06AC9	NEDD8-conjugating enzyme Ubc12 OS=Capsicum annuum OX=4072 GN=E2 PE=2 SV=1	E2	21	0.998	0.952	0.976	0.998	1.027	1.038	0.994	1	0.993	1.005	1.016	0.989	1.036	1.071	0.99	0.988	0.959	0.978	0.955	0.0635033	0.992	0.401711	1.059	0.080916	cytoplasm	K10579	UBE2M, UBC12; ubiquitin-conjugating enzyme E2 M	map04120 Ubiquitin mediated proteolysis				PF00179	Ubiquitin-conjugating enzyme	O	KOG0420	Ubiquitin-protein ligase
B5LAT9	Caffeoyl-CoA O-methyltransferase 6 OS=Capsicum annuum OX=4072 GN=T459_33541 PE=2 SV=1	T459_33541	27.8	0.826	0.848	0.905	1.114	1.157	1.146	1.006	0.993	0.982	1.027	0.997	0.972	1.146	1.11	1.136	0.888	0.858	0.876	0.755	0.000663386	0.995	0.795346	1.294	4.85957e-05	cytoplasm	K00588	E2.1.1.104; caffeoyl-CoA O-methyltransferase [EC:2.1.1.104]	map00940 Phenylpropanoid biosynthesis; map00941 Flavonoid biosynthesis; map00945 Stilbenoid, diarylheptanoid and gingerol biosynthesis; map01100 Metabolic pathways; map01110 Biosynthesis of secondary metabolites				PF01596	O-methyltransferase	Q	KOG1663	O-methyltransferase
B5LAW6	S-adenosylmethionine synthase OS=Capsicum annuum OX=4072 GN=T459_22567 PE=2 SV=1	T459_22567	42.6	0.965	0.93	0.943	1.046	1.035	1.054	1.053	1.031	1.006	0.957	0.976	0.977	0.996	1.033	0.985	1.012	1.026	0.978	0.905	0.00114823	1.062	0.0155585	0.999	0.975232	cytoskeleton	K00789	metK; S-adenosylmethionine synthetase [EC:2.5.1.6]	map00270 Cysteine and methionine metabolism; map01100 Metabolic pathways; map01110 Biosynthesis of secondary metabolites; map01230 Biosynthesis of amino acids		GO:0005622 intracellular; GO:0005623 cell; GO:0005737 cytoplasm; GO:0005829 cytosol;	GO:0003824 catalytic activity; GO:0004478 methionine adenosyltransferase activity; GO:0016740 transferase activity; GO:0016765 transferase activity, transferring alkyl or aryl (other than methyl) groups;	PF00438; PF02772; PF02773	S-adenosylmethionine synthetase, N-terminal domain; S-adenosylmethionine synthetase, central domain; S-adenosylmethionine synthetase, C-terminal domain	H	KOG1506	S-adenosylmethionine synthetase
Q6RVW5	Auxin-repressed 12.5 kDa protein OS=Capsicum annuum OX=4072 GN=T459_05568 PE=2 SV=1	T459_05568	8.3	0.81	0.867	0.942	1.104	1.125	1.156													0.774	0.00480932					cytoplasm
B2CZJ8	Pto kinase interactor 1 OS=Capsicum annuum OX=4072 GN=T459_31417 PE=2 SV=1	T459_31417	38.5	0.947	1.053	1.031	0.941	0.976	1.058	1.007	1.054	1.07	0.912	0.981	0.97	1.103	1.09	1.098	0.905	0.902	0.912	1.019	0.711898	1.094	0.0368742	1.21	2.29492e-06	cytoplasm	K13436	PTI1; pto-interacting protein 1 [EC:2.7.11.1]	map04626 Plant-pathogen interaction	GO:0006464 cellular protein modification process; GO:0006468 protein phosphorylation; GO:0006793 phosphorus metabolic process; GO:0006796 phosphate-containing compound metabolic process; GO:0006807 nitrogen compound metabolic process; GO:0007154 cell communication; GO:0007165 signal transduction; GO:0007166 cell surface receptor signaling pathway; GO:0007167 enzyme linked receptor protein signali…	GO:0005623 cell; GO:0005886 plasma membrane; GO:0016020 membrane; GO:0071944 cell periphery;	GO:0003824 catalytic activity; GO:0004672 protein kinase activity; GO:0004674 protein serine/threonine kinase activity; GO:0004675 transmembrane receptor protein serine/threonine kinase activity; GO:0004888 transmembrane signaling receptor activity; GO:0016301 kinase activity; GO:0016740 transferase activity; GO:0016772 transferase activity, transferring phosphorus-containing groups; GO:0016773 p…	PF07714	Protein tyrosine kinase	T	KOG1187	Serine/threonine protein kinase
I6VW44	Pathogenesis-related protein 4 OS=Capsicum annuum OX=4072 GN=PR4 PE=2 SV=1	PR4	15.9	0.949	0.969	0.859	1.083	1.092	1.055	1.053	1.082	1.049	0.914	0.959	0.953	1.346	1.229	1.122	0.739	0.881	0.775	0.86	0.0168606	1.127	0.00265813	1.544	0.00427034	extracellular				GO:0006950 response to stress; GO:0006952 defense response; GO:0050896 response to stimulus;			PF00967	Barwin family	S	KOG4742	Predicted chitinase
A4ZYP3	Tubulin beta chain OS=Capsicum annuum OX=4072 GN=T459_13399 PE=2 SV=1	T459_13399	50.4	0.978	0.988	1	1.022	1.019	1.006	0.905	0.958	0.922	1.056	1.059	1.059	0.889	0.897	0.887	1.132	1.116	1.112	0.973	0.0285954	0.877	0.00145178	0.796	3.729e-06	nucleus	K07375	TUBB; tubulin beta	map04145 Phagosome		GO:0005622 intracellular; GO:0005623 cell; GO:0005856 cytoskeleton; GO:0043226 organelle; GO:0043228 non-membrane-bounded organelle; GO:0043229 intracellular organelle; GO:0043232 intracellular non-membrane-bounded organelle;		PF00091; PF03953	Tubulin/FtsZ family, GTPase domain; Tubulin C-terminal domain	Z	KOG1375	Beta tubulin
Q9SML6	Endoglucanase OS=Capsicum annuum OX=4072 GN=eg2 PE=3 SV=1	eg2	54.5	0.888	1.087	1.021	1.045	1.04	0.885													1.009	0.924962					extracellular							PF00759	Glycosyl hydrolase family 9
Q96547	Endoglucanase OS=Capsicum annuum OX=4072 GN=ccel3 PE=2 SV=1	ccel3	53.6	1.012	0.972	1.2	0.958	0.946	0.916	1.01	0.986	1.022	1.09	0.902	0.996	1.111	1.202	1.045	0.898	0.9	0.858	1.129	0.149792	1.01	0.828661	1.264	0.00580213	chloroplast	K01179	E3.2.1.4; endoglucanase [EC:3.2.1.4]	map00500 Starch and sucrose metabolism; map01100 Metabolic pathways	GO:0009825 multidimensional cell growth; GO:0009987 cellular process; GO:0016043 cellular component organization; GO:0016049 cell growth; GO:0040007 growth; GO:0042545 cell wall modification; GO:0042547 cell wall modification involved in multidimensional cell growth; GO:0045229 external encapsulating structure organization; GO:0071554 cell wall organization or biogenesis; GO:0071555 cell wall org…	GO:0005622 intracellular; GO:0005623 cell; GO:0005737 cytoplasm; GO:0009507 chloroplast; GO:0009536 plastid; GO:0043226 organelle; GO:0043227 membrane-bounded organelle; GO:0043229 intracellular organelle; GO:0043231 intracellular membrane-bounded organelle;	GO:0003824 catalytic activity; GO:0004553 hydrolase activity, hydrolyzing O-glycosyl compounds; GO:0008810 cellulase activity; GO:0016787 hydrolase activity; GO:0016798 hydrolase activity, acting on glycosyl bonds;	PF00759	Glycosyl hydrolase family 9
J7H6V9	30S ribosomal protein S4, chloroplastic OS=Capsicum annuum OX=4072 GN=rps4 PE=3 SV=1	rps4	23.4	1.05	1.088	1.064	0.92	0.942	0.942							1.04	1.06	1.082	0.851	1.022	0.954	1.142	0.000523142			1.126	0.0910472	nucleus	K02986	RP-S4, rpsD; small subunit ribosomal protein S4	map03010 Ribosome	GO:0006417 regulation of translation; GO:0006450 regulation of translational fidelity; GO:0009889 regulation of biosynthetic process; GO:0009891 positive regulation of biosynthetic process; GO:0009893 positive regulation of metabolic process; GO:0010468 regulation of gene expression; GO:0010556 regulation of macromolecule biosynthetic process; GO:0010557 positive regulation of macromolecule biosy…	GO:0005622 intracellular; GO:0005623 cell; GO:0005737 cytoplasm; GO:0005840 ribosome; GO:0009507 chloroplast; GO:0009532 plastid stroma; GO:0009536 plastid; GO:0009570 chloroplast stroma; GO:0015935 small ribosomal subunit; GO:0016020 membrane; GO:0032991 protein-containing complex; GO:0043226 organelle; GO:0043227 membrane-bounded organelle; GO:0043228 non-membrane-bounded organelle; GO:0043229 …	GO:0003676 nucleic acid binding; GO:0003723 RNA binding; GO:0003735 structural constituent of ribosome; GO:0005198 structural molecule activity; GO:0005488 binding; GO:0019843 rRNA binding; GO:0097159 organic cyclic compound binding; GO:1901363 heterocyclic compound binding;	PF01479	S4 domain	J	KOG3301	Ribosomal protein S4
K4FXE7	Triose phosphate isomerase cytosolic isoform-like protein OS=Capsicum annuum OX=4072 GN=TPI PE=2 SV=1	TPI	27.1	0.945	0.96	0.943	1.052	1.063	1.032	1.027	1.029	1.034	0.971	0.971	0.975	1.119	1.083	1.091	0.882	0.919	0.935	0.905	0.000644697	1.059	1.90956e-05	1.204	0.000743018	cytoplasm	K01803	TPI, tpiA; triosephosphate isomerase (TIM) [EC:5.3.1.1]	map00010 Glycolysis / Gluconeogenesis; map00051 Fructose and mannose metabolism; map00562 Inositol phosphate metabolism; map00710 Carbon fixation in photosynthetic organisms; map01100 Metabolic pathways; map01110 Biosynthesis of secondary metabolites; map01200 Carbon metabolism; map01230 Biosynthesis of amino acids	GO:0005975 carbohydrate metabolic process; GO:0005996 monosaccharide metabolic process; GO:0006006 glucose metabolic process; GO:0006066 alcohol metabolic process; GO:0006071 glycerol metabolic process; GO:0006081 cellular aldehyde metabolic process; GO:0006082 organic acid metabolic process; GO:0006090 pyruvate metabolic process; GO:0006091 generation of precursor metabolites and energy; GO:0006…	GO:0005576 extracellular region; GO:0005618 cell wall; GO:0005622 intracellular; GO:0005623 cell; GO:0005737 cytoplasm; GO:0005739 mitochondrion; GO:0005773 vacuole; GO:0005774 vacuolar membrane; GO:0005829 cytosol; GO:0005886 plasma membrane; GO:0005911 cell-cell junction; GO:0009506 plasmodesma; GO:0009507 chloroplast; GO:0009532 plastid stroma; GO:0009536 plastid; GO:0009570 chloroplast stroma…	GO:0003824 catalytic activity; GO:0004807 triose-phosphate isomerase activity; GO:0005488 binding; GO:0005507 copper ion binding; GO:0016853 isomerase activity; GO:0016860 intramolecular oxidoreductase activity; GO:0016861 intramolecular oxidoreductase activity, interconverting aldoses and ketoses; GO:0043167 ion binding; GO:0043169 cation binding; GO:0046872 metal ion binding; GO:0046914 transit…	PF00121	Triosephosphate isomerase	G	KOG1643	Triosephosphate isomerase
A0A1X8VER0	Alpha,alpha-trehalose-phosphate synthase [UDP-forming] 1 OS=Capsicum annuum OX=4072 GN=TPS PE=2 SV=1	TPS	104.6	0.966	1.006	1.022	1.038	0.91	1.064	0.944	0.909	0.982	0.991	1.079	1.098	0.944	0.902	1.001	1.016	1.099	1.043	0.994	0.94228	0.895	0.0461927	0.902	0.0518693	chloroplast	K16055	TPS; trehalose 6-phosphate synthase/phosphatase [EC:2.4.1.15 3.1.3.12]	map00500 Starch and sucrose metabolism; map01100 Metabolic pathways						G	KOG1050	Trehalose-6-phosphate synthase component TPS1 and related subunits
B5LAT8	Putative cinnamyl alcohol dehydrogenase OS=Capsicum annuum OX=4072 GN=T459_33509 PE=2 SV=1	T459_33509	39	0.895	0.918	0.948	1.099	1.085	1.077	0.963	0.955	0.926	1.025	1.034	1.09	1.031	1.05	1.012	0.955	0.961	0.937	0.847	0.0007031	0.903	0.0108441	1.084	0.00350118	cytoplasm	K00083	CAD; cinnamyl-alcohol dehydrogenase [EC:1.1.1.195]	map00940 Phenylpropanoid biosynthesis; map01100 Metabolic pathways; map01110 Biosynthesis of secondary metabolites				PF08240	Alcohol dehydrogenase GroES-like domain	Q	KOG0023	Alcohol dehydrogenase, class V
B5LAU9	Glutamine synthetase OS=Capsicum annuum OX=4072 GN=T459_02814 PE=2 SV=1	T459_02814	47.6	0.886	0.942	0.908	1.078	1.068	1.074	0.946	0.917	0.944	1.019	1.086	1.065	0.99	1.023	1.025	0.994	0.946	1.063	0.85	0.000822842	0.885	0.00472536	1.012	0.741278	chloroplast	K01915	glnA, GLUL; glutamine synthetase [EC:6.3.1.2]	map00220 Arginine biosynthesis; map00250 Alanine, aspartate and glutamate metabolism; map00630 Glyoxylate and dicarboxylate metabolism; map00910 Nitrogen metabolism; map01100 Metabolic pathways; map01230 Biosynthesis of amino acids	GO:0006082 organic acid metabolic process; GO:0006520 cellular amino acid metabolic process; GO:0006536 glutamate metabolic process; GO:0006541 glutamine metabolic process; GO:0006807 nitrogen compound metabolic process; GO:0006950 response to stress; GO:0006970 response to osmotic stress; GO:0007568 aging; GO:0008152 metabolic process; GO:0009064 glutamine family amino acid metabolic process; GO…	GO:0005576 extracellular region; GO:0005622 intracellular; GO:0005623 cell; GO:0005737 cytoplasm; GO:0005739 mitochondrion; GO:0005829 cytosol; GO:0005840 ribosome; GO:0009507 chloroplast; GO:0009526 plastid envelope; GO:0009532 plastid stroma; GO:0009534 chloroplast thylakoid; GO:0009535 chloroplast thylakoid membrane; GO:0009536 plastid; GO:0009570 chloroplast stroma; GO:0009579 thylakoid; GO:0…	GO:0003824 catalytic activity; GO:0004356 glutamate-ammonia ligase activity; GO:0016211 ammonia ligase activity; GO:0016874 ligase activity; GO:0016879 ligase activity, forming carbon-nitrogen bonds; GO:0016880 acid-ammonia (or amide) ligase activity;	PF03951; PF00120	Glutamine synthetase, beta-Grasp domain; Glutamine synthetase, catalytic domain	E	KOG0683	Glutamine synthetase
J7H6W5	ATP synthase subunit beta, chloroplastic OS=Capsicum annuum OX=4072 GN=atpB PE=3 SV=1	atpB	53.6	0.981	0.997	0.998	1.011	1.029	1.005	1.085	1.026	1.041	0.95	0.93	0.973	1.156	1.153	1.204	0.876	0.825	0.831	0.977	0.0638899	1.105	0.00939397	1.387	0.000154323	chloroplast	K02112	ATPF1B, atpD; F-type H+/Na+-transporting ATPase subunit beta [EC:7.1.2.2 7.2.2.1]	map00190 Oxidative phosphorylation; map00195 Photosynthesis; map01100 Metabolic pathways	GO:0002376 immune system process; GO:0006950 response to stress; GO:0006952 defense response; GO:0006955 immune response; GO:0009266 response to temperature stimulus; GO:0009409 response to cold; GO:0009605 response to external stimulus; GO:0009607 response to biotic stimulus; GO:0009620 response to fungus; GO:0009628 response to abiotic stimulus; GO:0009814 defense response, incompatible interac…	GO:0005618 cell wall; GO:0005622 intracellular; GO:0005623 cell; GO:0005737 cytoplasm; GO:0009507 chloroplast; GO:0009526 plastid envelope; GO:0009532 plastid stroma; GO:0009534 chloroplast thylakoid; GO:0009535 chloroplast thylakoid membrane; GO:0009536 plastid; GO:0009544 chloroplast ATP synthase complex; GO:0009570 chloroplast stroma; GO:0009579 thylakoid; GO:0010287 plastoglobule; GO:0010319 …	GO:0005488 binding; GO:0008270 zinc ion binding; GO:0043167 ion binding; GO:0043169 cation binding; GO:0046872 metal ion binding; GO:0046914 transition metal ion binding;	PF02874; PF00006	ATP synthase alpha/beta family, beta-barrel domain; ATP synthase alpha/beta family, nucleotide-binding domain	C	KOG1758	Mitochondrial F1F0-ATP synthase, subunit delta/ATP16
[truncated: 8,079 more rows]
