# Supplementary material for: Proteomic analysis of differential anther development from sterile/fertile lines in Capsicum annuum L
Source: PeerJ. 2022 May 27;10:e13168. doi: 10.7717/peerj.13168 (PMC9150696; doi:10.7717/peerj.13168)
Supplement: Supplemental Information 4 — DAPs in the meiosis stage were mainly enriched in the protein processing in endoplasmic reticulum, proteomic regulatory subunits, and heat shock proteins pathways. [file peerj-10-13168-s004.xlsx]

## Sheet: BY_JSvsKY_JS
Protein accession	Protein description	Gene name	BY_JS/KY_JS Ratio	BY_JS/KY_JS P value	Regulated Type	MW [kDa]	BY_JS_1	BY_JS_2	BY_JS_3	KY_JS_1	KY_JS_2	KY_JS_3	BY_SF_1	BY_SF_2	BY_SF_3	KY_SF_1	KY_SF_2	KY_SF_3	BY_SH_1	BY_SH_2	BY_SH_3	KY_SH_1	KY_SH_2	KY_SH_3	Subcellular localization	KEGG KO No.	KEGG Gene	KEGG pathway	Biological Process	Cellular Component	Molecular Function	Pfam ID	Domain description	KOG category	KOG NO.	KOG description
A0A2G2Y361	Phosphatidylserine decarboxylase proenzyme 2 OS=Capsicum annuum OX=4072 GN=PSD2 PE=3 SV=1	PSD2	1.336	0.000210706	Up	71.9	1.189	1.105	1.148	0.846	0.862	0.868	0.894	0.964	0.93	1.044	1.084	1.087	0.819	0.831	0.853	1.132	1.195	1.171	nucleus	K01613	psd, PISD; phosphatidylserine decarboxylase [EC:4.1.1.65]	map00564 Glycerophospholipid metabolism; map01100 Metabolic pathways; map01110 Biosynthesis of secondary metabolites				PF00168; PF13833	C2 domain; EF-hand domain pair	I	KOG2419	Phosphatidylserine decarboxylase
A0A2G3A664	BSD domain-containing protein OS=Capsicum annuum OX=4072 GN=T459_04821 PE=4 SV=1	T459_04821	1.485	2.78986e-05	Up	43.6	1.204	1.179	1.205	0.798	0.832	0.786	1.151	1.16	1.067	0.886	0.881	0.867	0.938	0.966	0.903	1.116	1.034	1.049	chloroplast	K04079	HSP90A, htpG; molecular chaperone HtpG	map04141 Protein processing in endoplasmic reticulum; map04626 Plant-pathogen interaction						O	KOG0019	Molecular chaperone (HSP90 family)
A0A1U8GD38	Cryptochrome-1 OS=Capsicum annuum OX=4072 GN=T459_11927 PE=4 SV=1	T459_11927	1.43	0.00348208	Up	76.9	1.247	1.096	1.19	0.754	0.844	0.872	0.996	0.892	1.171	0.935	0.969	1.039							chloroplast	K12118	CRY1; cryptochrome 1	map04712 Circadian rhythm - plant	GO:0000302 response to reactive oxygen species; GO:0000304 response to singlet oxygen; GO:0001101 response to acid chemical; GO:0001558 regulation of cell growth; GO:0002682 regulation of immune system process; GO:0002684 positive regulation of immune system process; GO:0002831 regulation of response to biotic stimulus; GO:0002833 positive regulation of response to biotic stimulus; GO:0006139 nuc…	GO:0005622 intracellular; GO:0005623 cell; GO:0005634 nucleus; GO:0005654 nucleoplasm; GO:0005737 cytoplasm; GO:0016604 nuclear body; GO:0031974 membrane-enclosed lumen; GO:0031981 nuclear lumen; GO:0043226 organelle; GO:0043227 membrane-bounded organelle; GO:0043229 intracellular organelle; GO:0043231 intracellular membrane-bounded organelle; GO:0043233 organelle lumen; GO:0070013 intracellular …	GO:0000166 nucleotide binding; GO:0003824 catalytic activity; GO:0004672 protein kinase activity; GO:0005488 binding; GO:0005515 protein binding; GO:0005524 ATP binding; GO:0008144 drug binding; GO:0009881 photoreceptor activity; GO:0009882 blue light photoreceptor activity; GO:0016301 kinase activity; GO:0016740 transferase activity; GO:0016772 transferase activity, transferring phosphorus-conta…	PF00875; PF03441	DNA photolyase; FAD binding domain of DNA photolyase	LT	KOG0133	Deoxyribodipyrimidine photolyase/cryptochrome
A0A1U8FIW0	Oxalate--CoA ligase OS=Capsicum annuum OX=4072 GN=T459_09338 PE=4 SV=1	T459_09338	0.657	1.61748e-05	Down	56.3	0.776	0.792	0.813	1.231	1.208	1.187	0.788	0.888	0.847	1.048	1.059	1.179	0.953	1.038	0.95	1.04	1.044	0.997	cytoplasm	K22133	AAE3; oxalate---CoA ligase [EC:6.2.1.8]	map00630 Glyoxylate and dicarboxylate metabolism; map01100 Metabolic pathways	GO:0000003 reproduction; GO:0003006 developmental process involved in reproduction; GO:0006082 organic acid metabolic process; GO:0006950 response to stress; GO:0006952 defense response; GO:0007275 multicellular organism development; GO:0008152 metabolic process; GO:0009056 catabolic process; GO:0009605 response to external stimulus; GO:0009607 response to biotic stimulus; GO:0009620 response to …	GO:0005576 extracellular region; GO:0005622 intracellular; GO:0005623 cell; GO:0005737 cytoplasm; GO:0005911 cell-cell junction; GO:0009506 plasmodesma; GO:0009507 chloroplast; GO:0009532 plastid stroma; GO:0009536 plastid; GO:0009570 chloroplast stroma; GO:0030054 cell junction; GO:0043226 organelle; GO:0043227 membrane-bounded organelle; GO:0043229 intracellular organelle; GO:0043231 intracellu…	GO:0003824 catalytic activity; GO:0016405 CoA-ligase activity; GO:0016874 ligase activity; GO:0016877 ligase activity, forming carbon-sulfur bonds; GO:0016878 acid-thiol ligase activity; GO:0050203 oxalate-CoA ligase activity;	PF13193	Domain of unknown function (DUF4009)	I	KOG1176	Acyl-CoA synthetase
A0A1U8EK12	60S ribosomal protein L21-2 OS=Capsicum annuum OX=4072 GN=T459_26449 PE=4 SV=1	T459_26449	1.317	0.000279136	Up	18.6	1.147	1.102	1.164	0.842	0.86	0.89													cytoplasm	K02889	RP-L21e, RPL21; large subunit ribosomal protein L21e	map03010 Ribosome	GO:0006412 translation; GO:0006518 peptide metabolic process; GO:0006807 nitrogen compound metabolic process; GO:0008152 metabolic process; GO:0009058 biosynthetic process; GO:0009059 macromolecule biosynthetic process; GO:0009987 cellular process; GO:0010467 gene expression; GO:0019538 protein metabolic process; GO:0034641 cellular nitrogen compound metabolic process; GO:0034645 cellular macromo…	GO:0005622 intracellular; GO:0005623 cell; GO:0005737 cytoplasm; GO:0005829 cytosol; GO:0005840 ribosome; GO:0015934 large ribosomal subunit; GO:0022625 cytosolic large ribosomal subunit; GO:0022626 cytosolic ribosome; GO:0032991 protein-containing complex; GO:0043226 organelle; GO:0043228 non-membrane-bounded organelle; GO:0043229 intracellular organelle; GO:0043232 intracellular non-membrane-bo…	GO:0003735 structural constituent of ribosome; GO:0005198 structural molecule activity;			J	KOG1732	60S ribosomal protein L21
A0A2G2ZDA8	beta-glucosidase BoGH3B-like isoform X1(predicted) OS=Capsicum annuum OX=4072 GN=T459_18032 PE=4 SV=1	T459_18032	0.714	6.44154e-05	Down	72	0.859	0.814	0.831	1.167	1.192	1.146	0.932	0.907	0.947	1.07	1.004	1.093	1.169	1.132	1.138	0.859	0.864	0.892	cytoplasm	K05349	bglX; beta-glucosidase [EC:3.2.1.21]	map00460 Cyanoamino acid metabolism; map00500 Starch and sucrose metabolism; map00940 Phenylpropanoid biosynthesis; map01100 Metabolic pathways; map01110 Biosynthesis of secondary metabolites				PF00933; PF01915	Glycosyl hydrolase family 3 N terminal domain; Glycosyl hydrolase family 3 C-terminal domain
A0A1U8G218	N-alpha-acetyltransferase 16, NatA auxiliary subunit(predicted) OS=Capsicum annuum OX=4072 GN=T459_10891 PE=4 SV=1	T459_10891	1.352	5.51421e-06	Up	102.5	1.142	1.169	1.144	0.859	0.854	0.843	0.933	0.984	0.948	1.048	1.05	1.04	0.849	0.855	0.862	1.16	1.148	1.144	cytoplasm	K20792	NAA15_16; N-alpha-acetyltransferase 15/16, NatA auxiliary subunit							B	KOG1156	N-terminal acetyltransferase
A0A1U8EF12	O-acyltransferase WSD1-like(predicted) OS=Capsicum annuum OX=4072 GN=T459_25086 PE=4 SV=1	T459_25086	1.36	9.35882e-06	Up	58.5	1.171	1.156	1.143	0.84	0.847	0.864	1.019	0.992	1.045	0.964	1.005	0.989	0.989	0.944	0.953	1.088	1.033	1.02	cytoplasm				GO:0006629 lipid metabolic process; GO:0006638 neutral lipid metabolic process; GO:0006639 acylglycerol metabolic process; GO:0006641 triglyceride metabolic process; GO:0008152 metabolic process; GO:0008610 lipid biosynthetic process; GO:0009058 biosynthetic process; GO:0009987 cellular process; GO:0010025 wax biosynthetic process; GO:0010166 wax metabolic process; GO:0019432 triglyceride biosynt…	GO:0005622 intracellular; GO:0005623 cell; GO:0005737 cytoplasm; GO:0005783 endoplasmic reticulum; GO:0005886 plasma membrane; GO:0012505 endomembrane system; GO:0016020 membrane; GO:0043226 organelle; GO:0043227 membrane-bounded organelle; GO:0043229 intracellular organelle; GO:0043231 intracellular membrane-bounded organelle; GO:0071944 cell periphery;	GO:0003824 catalytic activity; GO:0004144 diacylglycerol O-acyltransferase activity; GO:0008374 O-acyltransferase activity; GO:0016411 acylglycerol O-acyltransferase activity; GO:0016740 transferase activity; GO:0016746 transferase activity, transferring acyl groups; GO:0016747 transferase activity, transferring acyl groups other than amino-acyl groups; GO:0047196 long-chain-alcohol O-fatty-acylt…	PF03007	Wax ester synthase-like Acyl-CoA acyltransferase domain
A0A1U8EPE0	40S ribosomal protein S9 OS=Capsicum annuum OX=4072 GN=T459_27355 PE=3 SV=1	T459_27355	1.858	8.94903e-06	Up	22.9	1.295	1.341	1.267	0.701	0.683	0.717	1.002	1.04	1.014	0.968	0.969	1.015	1.089	1.134	1.087	0.901	0.858	0.88	cytoplasm	K02997	RP-S9e, RPS9; small subunit ribosomal protein S9e	map03010 Ribosome				PF01479	S4 domain	J	KOG3301	Ribosomal protein S4
F2X8C7	Glyoxal oxidase-related protein OS=Capsicum annuum OX=4072 GN=T459_09426 PE=2 SV=1	T459_09426	0.653	1.80165e-06	Down	62.7	0.796	0.774	0.798	1.212	1.208	1.204	0.988	0.983	0.966	1.016	1.039	1.038							chloroplast							PF09118	Domain of unknown function (DUF1929)
A1YWL8	Squamosa promoter-binding-like protein OS=Capsicum annuum OX=4072 GN=T459_05565 PE=2 SV=1	T459_05565	0.702	0.00427838	Down	15.7	0.855	0.798	0.825	1.314	1.112	1.105													nucleus							PF03110	SBP domain
A0A1D5AHY8	Pvr4 OS=Capsicum annuum OX=4072 GN=Pvr4 PE=2 SV=1	Pvr4	1.359	0.000223952	Up	199.4	1.162	1.16	1.137	0.817	0.885	0.844	1.066	0.916	1.042	0.932	0.982	1.068	0.824	0.942	1.08	1.039	1.026	1.092	cytoplasm	K13459	RPS2; disease resistance protein RPS2	map04626 Plant-pathogen interaction				PF00931	NB-ARC domain	T	KOG4658	Apoptotic ATPase
A0A2G2ZJY6	F-box protein PP2-B10-like(predicted) OS=Capsicum annuum OX=4072 GN=T459_15314 PE=4 SV=1	T459_15314	0.441	4.20211e-05	Down	32.9	0.573	0.633	0.635	1.456	1.38	1.334	0.943	0.959	0.932	1.151	1.068	0.961							chloroplast
F2YL87	Lipoxygenase OS=Capsicum annuum OX=4072 GN=LOX PE=2 SV=1	LOX	1.32	1.33897e-05	Up	101	1.158	1.132	1.122	0.853	0.864	0.868	0.99	0.959	0.953	1.064	1.03	1.027	1.012	1.001	0.996	1.013	0.995	0.98	chloroplast	K00454	LOX2S; lipoxygenase [EC:1.13.11.12]	map00591 Linoleic acid metabolism; map00592 alpha-Linolenic acid metabolism; map01100 Metabolic pathways; map01110 Biosynthesis of secondary metabolites	GO:0006082 organic acid metabolic process; GO:0006629 lipid metabolic process; GO:0006631 fatty acid metabolic process; GO:0006690 icosanoid metabolic process; GO:0008152 metabolic process; GO:0009987 cellular process; GO:0010597 green leaf volatile biosynthetic process; GO:0019372 lipoxygenase pathway; GO:0019752 carboxylic acid metabolic process; GO:0032787 monocarboxylic acid metabolic process…	GO:0005622 intracellular; GO:0005623 cell; GO:0005737 cytoplasm; GO:0009507 chloroplast; GO:0009532 plastid stroma; GO:0009534 chloroplast thylakoid; GO:0009536 plastid; GO:0009570 chloroplast stroma; GO:0009579 thylakoid; GO:0031976 plastid thylakoid; GO:0031984 organelle subcompartment; GO:0043226 organelle; GO:0043227 membrane-bounded organelle; GO:0043229 intracellular organelle; GO:0043231 i…	GO:0003824 catalytic activity; GO:0016165 linoleate 13S-lipoxygenase activity; GO:0016491 oxidoreductase activity; GO:0016701 oxidoreductase activity, acting on single donors with incorporation of molecular oxygen; GO:0016702 oxidoreductase activity, acting on single donors with incorporation of molecular oxygen, incorporation of two atoms of oxygen; GO:0051213 dioxygenase activity;	PF01477; PF00305	PLAT/LH2 domain; Lipoxygenase
A0A2G2ZM25	Protein CER1-like 2 OS=Capsicum annuum OX=4072 GN=T459_11480 PE=4 SV=1	T459_11480	0.706	5.83211e-07	Down	43.1	0.83	0.827	0.831	1.188	1.166	1.168	0.839	0.884	0.783	1.226	1.186	1.155	0.834	0.841	0.789	1.169	1.153	1.141	nucleus	K15404	K15404, CER1; aldehyde decarbonylase [EC:4.1.99.5]	map00073 Cutin, suberine and wax biosynthesis; map01110 Biosynthesis of secondary metabolites				PF12076	WAX2 C-terminal domain
Q9LM08	Pepper esterase OS=Capsicum annuum OX=4072 GN=PepEST PE=2 SV=1	PepEST	1.319	0.00396426	Up	36.5	1.173	1.111	1.131	0.8	0.859	0.931	1.101	0.919	1.058	0.92	0.891	1.118	1.047	1.03	1.078	0.936	0.904	1.015	cytoplasm							PF07859	alpha/beta hydrolase fold	V	KOG1515	Arylacetamide deacetylase
J7H3V0	30S ribosomal protein S3, chloroplastic OS=Capsicum annuum OX=4072 GN=rps3 PE=3 SV=1	rps3	1.489	0.00265346	Up	25.1	1.105	1.321	1.167	0.849	0.785	0.779	1.007	0.95	0.918	0.96	1.044	1.126	0.907	0.95	0.87	1.113	1.098	1.066	extracellular	K02982	RP-S3, rpsC; small subunit ribosomal protein S3	map03010 Ribosome	GO:0002181 cytoplasmic translation; GO:0006412 translation; GO:0006518 peptide metabolic process; GO:0006807 nitrogen compound metabolic process; GO:0008152 metabolic process; GO:0009058 biosynthetic process; GO:0009059 macromolecule biosynthetic process; GO:0009987 cellular process; GO:0010467 gene expression; GO:0019538 protein metabolic process; GO:0034641 cellular nitrogen compound metabolic …	GO:0000313 organellar ribosome; GO:0000315 organellar large ribosomal subunit; GO:0005622 intracellular; GO:0005623 cell; GO:0005737 cytoplasm; GO:0005739 mitochondrion; GO:0005759 mitochondrial matrix; GO:0005761 mitochondrial ribosome; GO:0005762 mitochondrial large ribosomal subunit; GO:0005829 cytosol; GO:0005840 ribosome; GO:0009507 chloroplast; GO:0009536 plastid; GO:0015934 large ribosomal…	GO:0003735 structural constituent of ribosome; GO:0005198 structural molecule activity;	PF00189	Ribosomal protein S3, C-terminal domain	J	KOG1711	Mitochondrial/chloroplast ribosomal protein L22
Q8W4V6	Defensin OS=Capsicum annuum OX=4072 GN=T459_19053 PE=2 SV=1	T459_19053	2.248	7.45936e-06	Up	8.7	1.394	1.344	1.416	0.59	0.622	0.636													extracellular				GO:0006950 response to stress; GO:0006952 defense response; GO:0050896 response to stimulus;	GO:0005618 cell wall; GO:0005623 cell; GO:0005886 plasma membrane; GO:0009505 plant-type cell wall; GO:0016020 membrane; GO:0030312 external encapsulating structure; GO:0071944 cell periphery;		PF00304	Gamma-thionin family
B5LAT9	Caffeoyl-CoA O-methyltransferase 6 OS=Capsicum annuum OX=4072 GN=T459_33541 PE=2 SV=1	T459_33541	0.755	0.000663386	Down	27.8	0.826	0.848	0.905	1.114	1.157	1.146	1.006	0.993	0.982	1.027	0.997	0.972	1.146	1.11	1.136	0.888	0.858	0.876	cytoplasm	K00588	E2.1.1.104; caffeoyl-CoA O-methyltransferase [EC:2.1.1.104]	map00940 Phenylpropanoid biosynthesis; map00941 Flavonoid biosynthesis; map00945 Stilbenoid, diarylheptanoid and gingerol biosynthesis; map01100 Metabolic pathways; map01110 Biosynthesis of secondary metabolites				PF01596	O-methyltransferase	Q	KOG1663	O-methyltransferase
R9WWV8	Anther-specific protein OS=Capsicum annuum OX=4072 GN=T459_03276 PE=2 SV=1	T459_03276	0.524	5.05572e-06	Down	43.8	0.709	0.665	0.689	1.328	1.307	1.3	1.083	1.046	1.081	0.922	0.946	0.94							cytoplasm				GO:0006725 cellular aromatic compound metabolic process; GO:0007275 multicellular organism development; GO:0008152 metabolic process; GO:0009058 biosynthetic process; GO:0009555 pollen development; GO:0009653 anatomical structure morphogenesis; GO:0009987 cellular process; GO:0010208 pollen wall assembly; GO:0010584 pollen exine formation; GO:0010927 cellular component assembly involved in morpho…	GO:0005622 intracellular; GO:0005623 cell; GO:0005737 cytoplasm; GO:0005783 endoplasmic reticulum; GO:0012505 endomembrane system; GO:0043226 organelle; GO:0043227 membrane-bounded organelle; GO:0043229 intracellular organelle; GO:0043231 intracellular membrane-bounded organelle;	GO:0003824 catalytic activity; GO:0016740 transferase activity; GO:0016746 transferase activity, transferring acyl groups; GO:0016747 transferase activity, transferring acyl groups other than amino-acyl groups; GO:0090439 tetraketide alpha-pyrone synthase activity;	PF00195; PF02797	Chalcone and stilbene synthases, N-terminal domain; Chalcone and stilbene synthases, C-terminal domain
A0A1U8HCV5	Lysine-specific histone demethylase 1-like protein 2 OS=Capsicum annuum OX=4072 GN=T459_20673 PE=4 SV=1	T459_20673	1.408	0.00390596	Up	84	1.091	1.296	1.124	0.858	0.834	0.801													nucleus	K11450	KDM1A, AOF2, LSD1; [histone H3]-N6,N6-dimethyl-L-lysine4 FAD-dependent demethylase [EC:1.14.99.66]		GO:0006325 chromatin organization; GO:0006464 cellular protein modification process; GO:0006479 protein methylation; GO:0006807 nitrogen compound metabolic process; GO:0006996 organelle organization; GO:0008152 metabolic process; GO:0008213 protein alkylation; GO:0009987 cellular process; GO:0016043 cellular component organization; GO:0016569 covalent chromatin modification; GO:0016570 histone mo…			PF04433; PF01593	SWIRM domain; Flavin containing amine oxidoreductase	Q	KOG0029	Amine oxidase
A0A2G2XW83	ATP synthase subunit alpha, chloroplastic OS=Capsicum annuum OX=4072 GN=T459_34395 PE=4 SV=1	T459_34395	0.768	0.0167071	Down	20.9	0.847	0.796	0.966	1.18	1.162	1.054	0.984	0.895	1.084	0.957	0.994	1.092							chloroplast	K02111	ATPF1A, atpA; F-type H+/Na+-transporting ATPase subunit alpha [EC:7.1.2.2 7.2.2.1]	map00190 Oxidative phosphorylation; map00195 Photosynthesis; map01100 Metabolic pathways				PF00006	ATP synthase alpha/beta family, nucleotide-binding domain	C	KOG1353	F0F1-type ATP synthase, alpha subunit
A0A2G2ZVK3	Exportin-T OS=Capsicum annuum OX=4072 GN=T459_08108 PE=3 SV=1	T459_08108	1.339	0.00557044	Up	111.6	1.132	1.173	1.132	0.768	0.907	0.892													nucleus	K14288	XPOT; exportin-T	map03013 RNA transport	GO:0000003 reproduction; GO:0003006 developmental process involved in reproduction; GO:0006403 RNA localization; GO:0006405 RNA export from nucleus; GO:0006409 tRNA export from nucleus; GO:0006611 protein export from nucleus; GO:0006810 transport; GO:0006886 intracellular protein transport; GO:0006913 nucleocytoplasmic transport; GO:0007275 multicellular organism development; GO:0008104 protein l…	GO:0005622 intracellular; GO:0005623 cell; GO:0005634 nucleus; GO:0005635 nuclear envelope; GO:0005643 nuclear pore; GO:0005737 cytoplasm; GO:0005829 cytosol; GO:0012505 endomembrane system; GO:0016363 nuclear matrix; GO:0031967 organelle envelope; GO:0031974 membrane-enclosed lumen; GO:0031975 envelope; GO:0031981 nuclear lumen; GO:0032991 protein-containing complex; GO:0034399 nuclear periphery…	GO:0000049 tRNA binding; GO:0003676 nucleic acid binding; GO:0003723 RNA binding; GO:0005049 nuclear export signal receptor activity; GO:0005488 binding; GO:0005515 protein binding; GO:0008536 Ran GTPase binding; GO:0017016 Ras GTPase binding; GO:0019899 enzyme binding; GO:0031267 small GTPase binding; GO:0051020 GTPase binding; GO:0097159 organic cyclic compound binding; GO:0140104 molecular car…			JUY	KOG2021	Nuclear mRNA export factor receptor LOS1/Exportin-t (importin beta superfamily)
A0A2G2YXM2	Putative ripening-related protein 1 OS=Capsicum annuum OX=4072 GN=T459_21766 PE=4 SV=1	T459_21766	1.326	0.000964341	Up	52.5	1.104	1.109	1.21	0.881	0.844	0.856	1.015	1.012	1.008	0.919	0.964	1.088							plasma membrane				GO:0001505 regulation of neurotransmitter levels; GO:0007154 cell communication; GO:0007165 signal transduction; GO:0009987 cellular process; GO:0010646 regulation of cell communication; GO:0019722 calcium-mediated signaling; GO:0019932 second-messenger-mediated signaling; GO:0023051 regulation of signaling; GO:0023052 signaling; GO:0030100 regulation of endocytosis; GO:0030334 regulation of cell…	GO:0005622 intracellular; GO:0005623 cell; GO:0005737 cytoplasm; GO:0005768 endosome; GO:0005783 endoplasmic reticulum; GO:0005789 endoplasmic reticulum membrane; GO:0008021 synaptic vesicle; GO:0012505 endomembrane system; GO:0012506 vesicle membrane; GO:0016020 membrane; GO:0016021 integral component of membrane; GO:0030133 transport vesicle; GO:0030658 transport vesicle membrane; GO:0030659 cy…	GO:0005488 binding; GO:0005509 calcium ion binding; GO:0043167 ion binding; GO:0043169 cation binding; GO:0046872 metal ion binding;
A0A2G2ZAQ3	Transcription initiation factor TFIID subunit 5 OS=Capsicum annuum OX=4072 GN=T459_17138 PE=4 SV=1	T459_17138	1.32	9.84851e-05	Up	74.3	1.166	1.126	1.147	0.855	0.894	0.856	0.991	1.053	0.979	1.083	0.989	0.889	0.93	0.95	0.995	1.049	1.063	1.019	nucleus	K03130	TAF5; transcription initiation factor TFIID subunit 5	map03022 Basal transcription factors	GO:0006139 nucleobase-containing compound metabolic process; GO:0006351 transcription, DNA-templated; GO:0006352 DNA-templated transcription, initiation; GO:0006355 regulation of transcription, DNA-templated; GO:0006366 transcription by RNA polymerase II; GO:0006367 transcription initiation from RNA polymerase II promoter; GO:0006725 cellular aromatic compound metabolic process; GO:0006807 nitrog…	GO:0000123 histone acetyltransferase complex; GO:0000228 nuclear chromosome; GO:0000428 DNA-directed RNA polymerase complex; GO:0000785 chromatin; GO:0000790 nuclear chromatin; GO:0005622 intracellular; GO:0005623 cell; GO:0005634 nucleus; GO:0005654 nucleoplasm; GO:0005667 transcription regulator complex; GO:0005669 transcription factor TFIID complex; GO:0005694 chromosome; GO:0005856 cytoskelet…	GO:0001067 regulatory region nucleic acid binding; GO:0003676 nucleic acid binding; GO:0003677 DNA binding; GO:0003700 DNA-binding transcription factor activity; GO:0005488 binding; GO:0005515 protein binding; GO:0042802 identical protein binding; GO:0046983 protein dimerization activity; GO:0097159 organic cyclic compound binding; GO:0140110 transcription regulator activity; GO:1901363 heterocyc…			K	KOG0263	Transcription initiation factor TFIID, subunit TAF5 (also component of histone acetyltransferase SAGA)
A0A1U8G5S4	Pathogenesis-related protein STH-21 OS=Capsicum annuum OX=4072 GN=T459_07760 PE=4 SV=1	T459_07760	1.375	0.00524273	Up	17.3	1.155	1.155	1.167	0.942	0.78	0.806													cytoplasm							PF00407	Pathogenesis-related protein Bet v I family
A0A2G2ZI38	LOW QUALITY PROTEIN: WD repeat-containing protein 26-like(predicted) OS=Capsicum annuum OX=4072 GN=T459_14682 PE=4 SV=1	T459_14682	1.485	0.00164573	Up	29.3	1.114	1.237	1.236	0.745	0.848	0.823	1.028	1.015	0.829	1.009	0.989	1.137	0.829	0.818	0.94	1.079	1.225	1.111	nucleus	K22382	WDR26; WD repeat-containing protein 26							S	KOG0293	WD40 repeat-containing protein
A0A2G2YDY4	TPR_REGION domain-containing protein OS=Capsicum annuum OX=4072 GN=T459_27450 PE=4 SV=1	T459_27450	1.319	0.00284834	Up	53.5	1.154	1.09	1.171	0.921	0.812	0.856	0.944	0.861	0.859	1.045	1.147	1.16	0.864	0.926	0.912	1.116	1.102	1.112	cytoplasm									S	KOG2610	Uncharacterized conserved protein
A0A2G3AAE1	nucleolar protein 6(predicted) OS=Capsicum annuum OX=4072 GN=T459_06329 PE=3 SV=1	T459_06329	1.31	0.00366661	Up	40.4	1.218	1.056	1.132	0.84	0.877	0.883	1.009	0.875	0.897	1.016	1.214	0.993							cytoplasm	K14544	UTP22, NOL6; U3 small nucleolar RNA-associated protein 22	map03008 Ribosome biogenesis in eukaryotes				PF03813	Nrap protein	J	KOG2054	Nucleolar RNA-associated protein (NRAP)
A0A2G2Z667	Proteasome activator subunit 4 OS=Capsicum annuum OX=4072 GN=T459_20976 PE=4 SV=1	T459_20976	1.407	0.000768425	Up	95.3	1.196	1.1	1.213	0.797	0.848	0.849	0.997	0.972	1.005	1.012	0.956	1.064	0.844	0.795	0.759	1.147	1.267	1.19	endoplasmic reticulum	K06699	PSME4; proteasome activator subunit 4	map03050 Proteasome	GO:0006508 proteolysis; GO:0006807 nitrogen compound metabolic process; GO:0008152 metabolic process; GO:0009056 catabolic process; GO:0009057 macromolecule catabolic process; GO:0009893 positive regulation of metabolic process; GO:0009987 cellular process; GO:0010498 proteasomal protein catabolic process; GO:0010499 proteasomal ubiquitin-independent protein catabolic process; GO:0010604 positive…	GO:0000502 proteasome complex; GO:0005622 intracellular; GO:0005623 cell; GO:0005634 nucleus; GO:0005737 cytoplasm; GO:0005829 cytosol; GO:0005839 proteasome core complex; GO:0032991 protein-containing complex; GO:0043226 organelle; GO:0043227 membrane-bounded organelle; GO:0043229 intracellular organelle; GO:0043231 intracellular membrane-bounded organelle; GO:1902494 catalytic complex; GO:19053…	GO:0005488 binding; GO:0005515 protein binding; GO:0008047 enzyme activator activity; GO:0016504 peptidase activator activity; GO:0030234 enzyme regulator activity; GO:0042393 histone binding; GO:0044877 protein-containing complex binding; GO:0061134 peptidase regulator activity; GO:0070577 lysine-acetylated histone binding; GO:0070628 proteasome binding; GO:0098772 molecular function regulator; …			S	KOG1851	Uncharacterized conserved protein
A0A2G3APD0	Serine/threonine-protein kinase CTR1 OS=Capsicum annuum OX=4072 GN=T459_03885 PE=4 SV=1	T459_03885	1.429	0.000754499	Up	80.9	1.163	1.118	1.251	0.807	0.857	0.808	0.947	1.046	1.061	1.03	0.919	1.004							nucleus				GO:0001666 response to hypoxia; GO:0006082 organic acid metabolic process; GO:0006464 cellular protein modification process; GO:0006468 protein phosphorylation; GO:0006629 lipid metabolic process; GO:0006720 isoprenoid metabolic process; GO:0006721 terpenoid metabolic process; GO:0006793 phosphorus metabolic process; GO:0006796 phosphate-containing compound metabolic process; GO:0006807 nitrogen …	GO:0005622 intracellular; GO:0005623 cell; GO:0005737 cytoplasm; GO:0005783 endoplasmic reticulum; GO:0005789 endoplasmic reticulum membrane; GO:0012505 endomembrane system; GO:0016020 membrane; GO:0031984 organelle subcompartment; GO:0042175 nuclear outer membrane-endoplasmic reticulum membrane network; GO:0043226 organelle; GO:0043227 membrane-bounded organelle; GO:0043229 intracellular organel…	GO:0003824 catalytic activity; GO:0004672 protein kinase activity; GO:0004674 protein serine/threonine kinase activity; GO:0004712 protein serine/threonine/tyrosine kinase activity; GO:0016301 kinase activity; GO:0016740 transferase activity; GO:0016772 transferase activity, transferring phosphorus-containing groups; GO:0016773 phosphotransferase activity, alcohol group as acceptor; GO:0140096 ca…	PF13426; PF07714	PAS domain; Protein tyrosine kinase	T	KOG0192	Tyrosine kinase specific for activated (GTP-bound) p21cdc42Hs
A0A2G2YY00	Adaptin_N domain-containing protein OS=Capsicum annuum OX=4072 GN=T459_21915 PE=4 SV=1	T459_21915	1.323	0.00493589	Up	23	1.215	1.057	1.149	0.833	0.912	0.84							0.798	1.013	0.84	1.107	1.138	1.108	chloroplast						GO:0005488 binding; GO:0005515 protein binding; GO:0019899 enzyme binding; GO:0019900 kinase binding; GO:0019901 protein kinase binding; GO:0043424 protein histidine kinase binding;			U	KOG1061	Vesicle coat complex AP-1/AP-2/AP-4, beta subunit
A0A2G2Y1U4	UDP-glucose:glycoprotein glucosyltransferase OS=Capsicum annuum OX=4072 GN=T459_32398 PE=4 SV=1	T459_32398	1.327	7.52966e-05	Up	137.8	1.13	1.121	1.152	0.831	0.86	0.874	0.971	0.948	0.96	1.066	1.068	1.006	0.924	0.902	0.886	1.12	1.073	1.063	chloroplast	K11718	HUGT; UDP-glucose:glycoprotein glucosyltransferase [EC:2.4.1.-]	map04141 Protein processing in endoplasmic reticulum	GO:0001101 response to acid chemical; GO:0002218 activation of innate immune response; GO:0002253 activation of immune response; GO:0002376 immune system process; GO:0002682 regulation of immune system process; GO:0002684 positive regulation of immune system process; GO:0006011 UDP-glucose metabolic process; GO:0006139 nucleobase-containing compound metabolic process; GO:0006457 protein folding; …	GO:0005622 intracellular; GO:0005623 cell; GO:0005737 cytoplasm; GO:0005783 endoplasmic reticulum; GO:0012505 endomembrane system; GO:0043226 organelle; GO:0043227 membrane-bounded organelle; GO:0043229 intracellular organelle; GO:0043231 intracellular membrane-bounded organelle;	GO:0003824 catalytic activity; GO:0003980 UDP-glucose:glycoprotein glucosyltransferase activity; GO:0005488 binding; GO:0005515 protein binding; GO:0008194 UDP-glycosyltransferase activity; GO:0016740 transferase activity; GO:0016757 transferase activity, transferring glycosyl groups; GO:0016758 transferase activity, transferring hexosyl groups; GO:0035251 UDP-glucosyltransferase activity; GO:004…			G	KOG1879	UDP-glucose:glycoprotein glucosyltransferase
A0A2G3AHL9	pollen-specific leucine-rich repeat extensin-like protein 2 isoform X2(predicted) OS=Capsicum annuum OX=4072 GN=T459_01609 PE=4 SV=1	T459_01609	0.693	8.57325e-06	Down	37.3	0.828	0.802	0.829	1.197	1.181	1.17	0.757	0.766	0.748	1.315	1.181	1.233	1.225	1.2	1.146	0.816	0.843	0.785	extracellular
A0A1U8FDM6	Bet_v_1 domain-containing protein OS=Capsicum annuum OX=4072 GN=T459_19581 PE=4 SV=1	T459_19581	0.756	0.000743245	Down	17.8	0.814	0.847	0.894	1.154	1.121	1.104	1.014	1.05	1.005	0.994	0.966	0.978	1.087	1.084	1.1	0.928	0.917	0.888	cytoplasm					GO:0005622 intracellular; GO:0005623 cell; GO:0005737 cytoplasm; GO:0009507 chloroplast; GO:0009536 plastid; GO:0043226 organelle; GO:0043227 membrane-bounded organelle; GO:0043229 intracellular organelle; GO:0043231 intracellular membrane-bounded organelle;		PF00407	Pathogenesis-related protein Bet v I family
A0A2G3AD03	Acetyl-coenzyme A synthetase OS=Capsicum annuum OX=4072 GN=T459_07227 PE=3 SV=1	T459_07227	1.335	0.000204897	Up	86.7	1.118	1.154	1.17	0.841	0.89	0.847	0.924	1.018	0.948	1.022	1.062	1.026	0.882	0.872	0.904	1.118	1.134	1.076	cytoplasm	K01895	ACSS1_2, acs; acetyl-CoA synthetase [EC:6.2.1.1]	map00010 Glycolysis / Gluconeogenesis; map00620 Pyruvate metabolism; map00630 Glyoxylate and dicarboxylate metabolism; map00640 Propanoate metabolism; map01100 Metabolic pathways; map01110 Biosynthesis of secondary metabolites; map01200 Carbon metabolism	GO:0006082 organic acid metabolic process; GO:0006083 acetate metabolic process; GO:0008152 metabolic process; GO:0009987 cellular process; GO:0016999 antibiotic metabolic process; GO:0017144 drug metabolic process; GO:0019752 carboxylic acid metabolic process; GO:0032787 monocarboxylic acid metabolic process; GO:0043436 oxoacid metabolic process; GO:0044237 cellular metabolic process; GO:0044281…	GO:0005622 intracellular; GO:0005623 cell; GO:0005737 cytoplasm; GO:0005777 peroxisome; GO:0005829 cytosol; GO:0009507 chloroplast; GO:0009514 glyoxysome; GO:0009532 plastid stroma; GO:0009536 plastid; GO:0009570 chloroplast stroma; GO:0042579 microbody; GO:0043226 organelle; GO:0043227 membrane-bounded organelle; GO:0043229 intracellular organelle; GO:0043231 intracellular membrane-bounded organ…	GO:0003824 catalytic activity; GO:0003987 acetate-CoA ligase activity; GO:0016405 CoA-ligase activity; GO:0016874 ligase activity; GO:0016877 ligase activity, forming carbon-sulfur bonds; GO:0016878 acid-thiol ligase activity;	PF13193	Domain of unknown function (DUF4009)	I	KOG1175	Acyl-CoA synthetase
A0A1U8FTI5	Exocyst subunit Exo70 family protein OS=Capsicum annuum OX=4072 GN=T459_08171 PE=3 SV=1	T459_08171	1.374	0.00088671	Up	69.6	1.147	1.194	1.134	0.799	0.893	0.838	0.867	0.891	1.003	1.165	1.083	0.994	1.011	0.925	1.09	0.959	1.006	1.016	nucleus	K07195	EXOC7, EXO70; exocyst complex component 7							U	KOG2344	Exocyst component protein and related proteins
A0A2G2ZF41	Cullin-1 OS=Capsicum annuum OX=4072 GN=T459_18583 PE=3 SV=1	T459_18583	1.361	0.000293075	Up	86.1	1.148	1.184	1.101	0.866	0.833	0.823	0.963	0.913	0.962	1.055	1.037	1.072	0.797	0.762	0.894	1.13	1.138	1.16	cytoplasm	K03347	CUL1, CDC53; cullin 1	map04120 Ubiquitin mediated proteolysis; map04141 Protein processing in endoplasmic reticulum				PF10557	Cullin protein neddylation domain	D	KOG2166	Cullins
A0A2G3A016	Putative 6-phosphogluconolactonase 4, chloroplastic OS=Capsicum annuum OX=4072 GN=T459_09678 PE=4 SV=1	T459_09678	1.305	0.000331875	Up	36.2	1.139	1.114	1.146	0.866	0.837	0.902	1.209	1.17	1.136	0.804	0.835	0.831	1.208	1.106	1.173	0.812	0.833	0.767	mitochondria	K01057	PGLS, pgl, devB; 6-phosphogluconolactonase [EC:3.1.1.31]	map00030 Pentose phosphate pathway; map01100 Metabolic pathways; map01110 Biosynthesis of secondary metabolites; map01200 Carbon metabolism	GO:0002229 defense response to oomycetes; GO:0002239 response to oomycetes; GO:0006081 cellular aldehyde metabolic process; GO:0006082 organic acid metabolic process; GO:0006098 pentose-phosphate shunt; GO:0006139 nucleobase-containing compound metabolic process; GO:0006725 cellular aromatic compound metabolic process; GO:0006732 coenzyme metabolic process; GO:0006733 oxidoreduction coenzyme meta…	GO:0005622 intracellular; GO:0005623 cell; GO:0005737 cytoplasm; GO:0005773 vacuole; GO:0005774 vacuolar membrane; GO:0005777 peroxisome; GO:0005829 cytosol; GO:0009507 chloroplast; GO:0009532 plastid stroma; GO:0009536 plastid; GO:0009570 chloroplast stroma; GO:0016020 membrane; GO:0031090 organelle membrane; GO:0042579 microbody; GO:0043226 organelle; GO:0043227 membrane-bounded organelle; GO:0…	GO:0003824 catalytic activity; GO:0016787 hydrolase activity; GO:0016788 hydrolase activity, acting on ester bonds; GO:0017057 6-phosphogluconolactonase activity; GO:0052689 carboxylic ester hydrolase activity;	PF01182	Glucosamine-6-phosphate isomerases/6-phosphogluconolactonase	G	KOG3147	6-phosphogluconolactonase - like protein
A0A2G2Z950	Heat shock protein 82 OS=Capsicum annuum OX=4072 GN=T459_16580 PE=3 SV=1	T459_16580	1.349	0.00143522	Up	80.3	1.136	1.216	1.081	0.872	0.85	0.822	1.087	1.13	0.986	0.919	0.966	0.922	0.837	0.914	0.812	1.153	1.136	1.126	cytoplasm	K04079	HSP90A, htpG; molecular chaperone HtpG	map04141 Protein processing in endoplasmic reticulum; map04626 Plant-pathogen interaction	GO:0002376 immune system process; GO:0006457 protein folding; GO:0006950 response to stress; GO:0006952 defense response; GO:0006955 immune response; GO:0009605 response to external stimulus; GO:0009607 response to biotic stimulus; GO:0009617 response to bacterium; GO:0009814 defense response, incompatible interaction; GO:0009816 defense response to bacterium, incompatible interaction; GO:0009987…			PF02518	Histidine kinase-, DNA gyrase B-, and HSP90-like ATPase	O	KOG0019	Molecular chaperone (HSP90 family)
A0A2G3A9L0	Gamma-tubulin complex component OS=Capsicum annuum OX=4072 GN=T459_06055 PE=3 SV=1	T459_06055	1.379	0.00527612	Up	80.6	1.054	1.284	1.142	0.85	0.842	0.832	0.886	0.935	0.86	1.188	1.072	1.065	0.767	0.86	0.646	1.303	1.087	1.341	nucleus	K16569	TUBGCP2, GCP2; gamma-tubulin complex component 2					PF04130	Spc97 / Spc98 family	Z	KOG2001	Gamma-tubulin complex, DGRIP84/SPC97 component
A0A2G2YV19	Sucrose synthase OS=Capsicum annuum OX=4072 GN=T459_24403 PE=3 SV=1	T459_24403	1.361	1.29955e-05	Up	92.4	1.14	1.158	1.149	0.845	0.828	0.86	0.99	1.01	0.988	1.007	1.006	0.994	0.959	0.959	0.976	1.05	1.046	1.044	cytoplasm	K00695	E2.4.1.13; sucrose synthase [EC:2.4.1.13]	map00500 Starch and sucrose metabolism; map01100 Metabolic pathways	GO:0000003 reproduction; GO:0001101 response to acid chemical; GO:0001666 response to hypoxia; GO:0003006 developmental process involved in reproduction; GO:0006950 response to stress; GO:0006970 response to osmotic stress; GO:0007275 multicellular organism development; GO:0009266 response to temperature stimulus; GO:0009409 response to cold; GO:0009413 response to flooding; GO:0009414 response t…	GO:0005622 intracellular; GO:0005623 cell; GO:0005737 cytoplasm; GO:0005773 vacuole; GO:0005829 cytosol; GO:0005886 plasma membrane; GO:0005911 cell-cell junction; GO:0009506 plasmodesma; GO:0016020 membrane; GO:0030054 cell junction; GO:0043226 organelle; GO:0043227 membrane-bounded organelle; GO:0043229 intracellular organelle; GO:0043231 intracellular membrane-bounded organelle; GO:0055044 sym…	GO:0003824 catalytic activity; GO:0008194 UDP-glycosyltransferase activity; GO:0016157 sucrose synthase activity; GO:0016740 transferase activity; GO:0016757 transferase activity, transferring glycosyl groups; GO:0016758 transferase activity, transferring hexosyl groups; GO:0035251 UDP-glucosyltransferase activity; GO:0046527 glucosyltransferase activity;			M	KOG0853	Glycosyltransferase
A0A2G2YKY5	SWIRM domain-containing protein OS=Capsicum annuum OX=4072 GN=T459_25488 PE=4 SV=1	T459_25488	1.368	0.0011811	Up	87.7	1.102	1.201	1.157	0.802	0.886	0.841	0.842	0.864	1.021	1.152	1.066	1.056	0.933	0.875	0.867	1.084	1.168	1.077	chloroplast	K11450	KDM1A, AOF2, LSD1; [histone H3]-N6,N6-dimethyl-L-lysine4 FAD-dependent demethylase [EC:1.14.99.66]		GO:0006325 chromatin organization; GO:0006464 cellular protein modification process; GO:0006476 protein deacetylation; GO:0006479 protein methylation; GO:0006807 nitrogen compound metabolic process; GO:0006996 organelle organization; GO:0007275 multicellular organism development; GO:0008152 metabolic process; GO:0008213 protein alkylation; GO:0009987 cellular process; GO:0016043 cellular componen…	GO:0005622 intracellular; GO:0005623 cell; GO:0005634 nucleus; GO:0043226 organelle; GO:0043227 membrane-bounded organelle; GO:0043229 intracellular organelle; GO:0043231 intracellular membrane-bounded organelle;		PF04433; PF01593	SWIRM domain; Flavin containing amine oxidoreductase	Q	KOG0029	Amine oxidase
A0A2G2ZSE8	Floral homeotic protein PMADS 1 OS=Capsicum annuum OX=4072 GN=T459_13327 PE=4 SV=1	T459_13327	0.709	0.00566775	Down	17.2	0.808	0.807	0.877	1.284	1.055	1.175	0.876	0.789	0.883	1.195	1.181	1.078	1.01	0.892	1.061	0.94	1.045	1.059	nucleus	K09264	K09264; MADS-box transcription factor, plant		GO:0000003 reproduction; GO:0003002 regionalization; GO:0003006 developmental process involved in reproduction; GO:0006355 regulation of transcription, DNA-templated; GO:0007275 multicellular organism development; GO:0007389 pattern specification process; GO:0009653 anatomical structure morphogenesis; GO:0009791 post-embryonic development; GO:0009889 regulation of biosynthetic process; GO:0009908…	GO:0005622 intracellular; GO:0005623 cell; GO:0005634 nucleus; GO:0043226 organelle; GO:0043227 membrane-bounded organelle; GO:0043229 intracellular organelle; GO:0043231 intracellular membrane-bounded organelle;	GO:0003700 DNA-binding transcription factor activity; GO:0140110 transcription regulator activity;	PF00319	SRF-type transcription factor (DNA-binding and dimerisation domain)	K	KOG0014	MADS box transcription factor
A0A2G2YG67	ENTH domain-containing protein OS=Capsicum annuum OX=4072 GN=T459_28202 PE=4 SV=1	T459_28202	0.672	0.00051632	Down	38.2	0.78	0.845	0.789	1.224	1.128	1.241							0.916	0.8	0.806	1.11	1.188	1.184	nucleus	K12471	EPN; epsin	map04144 Endocytosis				PF01417	ENTH domain	F	KOG2056	Equilibrative nucleoside transporter protein
A0A1U8F691	Fumarylacetoacetase OS=Capsicum annuum OX=4072 GN=T459_29092 PE=3 SV=1	T459_29092	0.686	0.000254518	Down	45.8	0.805	0.83	0.814	1.256	1.178	1.136	0.988	1.002	1.02	0.982	1.01	1.004	1.074	1.082	1.065	0.918	0.928	0.942	cytoplasm	K01555	FAH, fahA; fumarylacetoacetase [EC:3.7.1.2]	map00350 Tyrosine metabolism; map01100 Metabolic pathways	GO:0006082 organic acid metabolic process; GO:0006520 cellular amino acid metabolic process; GO:0006570 tyrosine metabolic process; GO:0006572 tyrosine catabolic process; GO:0006725 cellular aromatic compound metabolic process; GO:0006807 nitrogen compound metabolic process; GO:0008152 metabolic process; GO:0008219 cell death; GO:0009056 catabolic process; GO:0009063 cellular amino acid catabolic…	GO:0005622 intracellular; GO:0005623 cell; GO:0005737 cytoplasm; GO:0005829 cytosol;	GO:0003824 catalytic activity; GO:0004334 fumarylacetoacetase activity; GO:0016787 hydrolase activity; GO:0016822 hydrolase activity, acting on acid carbon-carbon bonds; GO:0016823 hydrolase activity, acting on acid carbon-carbon bonds, in ketonic substances;	PF09298	Domain of unknown function (DUF1969)	G	KOG2843	Fumarylacetoacetase
A0A2G2YJ34	26S proteasome non-ATPase regulatory subunit 2 homolog OS=Capsicum annuum OX=4072 GN=T459_24858 PE=3 SV=1	T459_24858	1.379	1.39175e-05	Up	97.9	1.169	1.14	1.15	0.82	0.839	0.849	0.935	0.937	0.915	1.072	1.056	1.079	0.828	0.85	0.824	1.186	1.199	1.178	plasma membrane	K03028	PSMD2, RPN1; 26S proteasome regulatory subunit N1	map03050 Proteasome	GO:0001101 response to acid chemical; GO:0002376 immune system process; GO:0006508 proteolysis; GO:0006511 ubiquitin-dependent protein catabolic process; GO:0006807 nitrogen compound metabolic process; GO:0006950 response to stress; GO:0006952 defense response; GO:0006955 immune response; GO:0008152 metabolic process; GO:0009056 catabolic process; GO:0009057 macromolecule catabolic process; GO:00…	GO:0000502 proteasome complex; GO:0005622 intracellular; GO:0005623 cell; GO:0005634 nucleus; GO:0005737 cytoplasm; GO:0005829 cytosol; GO:0005838 proteasome regulatory particle; GO:0005886 plasma membrane; GO:0005911 cell-cell junction; GO:0008540 proteasome regulatory particle, base subcomplex; GO:0009506 plasmodesma; GO:0016020 membrane; GO:0022624 proteasome accessory complex; GO:0030054 cell…	GO:0005488 binding; GO:0005515 protein binding; GO:0032182 ubiquitin-like protein binding; GO:0043130 ubiquitin binding;			O	KOG2005	26S proteasome regulatory complex, subunit RPN1/PSMD2
A0A1U8E6C0	Putative aminopeptidase-like protein AC3.5-like(predicted) OS=Capsicum annuum OX=4072 GN=T459_22581 PE=4 SV=1	T459_22581	0.709	0.00013145	Down	12.1	0.822	0.843	0.828	1.221	1.131	1.162													nucleus
A0A2G3AF34	Inhibitor I9 domain-containing protein OS=Capsicum annuum OX=4072 GN=T459_00733 PE=4 SV=1	T459_00733	0.683	0.0011332	Down	24.1	0.844	0.778	0.806	1.203	1.253	1.098													mitochondria	K15333	TRM3, TARBP1; tRNA guanosine-2'-O-methyltransferase [EC:2.1.1.34]					PF05922	Peptidase inhibitor I9
A0A1U8G3I1	Zinc finger CCCH domain-containing protein 32 OS=Capsicum annuum OX=4072 GN=T459_08379 PE=4 SV=1	T459_08379	0.755	0.00186085	Down	46.3	0.866	0.911	0.809	1.13	1.18	1.114	1.01	1.014	0.9	1.054	0.994	1.036	0.928	0.808	0.781	1.083	1.299	1.105	nucleus						GO:0003676 nucleic acid binding; GO:0003723 RNA binding; GO:0003729 mRNA binding; GO:0005488 binding; GO:0097159 organic cyclic compound binding; GO:1901363 heterocyclic compound binding;			S	KOG1677	CCCH-type Zn-finger protein
A0A2G2Z1D1	3-hydroxyisobutyryl-CoA hydrolase-like protein 4, mitochondrial OS=Capsicum annuum OX=4072 GN=T459_19344 PE=3 SV=1	T459_19344	0.678	1.54307e-05	Down	41.4	0.812	0.799	0.822	1.207	1.218	1.166	0.841	0.862	0.84	1.165	1.168	1.175	0.874	0.826	0.892	1.13	1.132	1.166	cytoplasm	K05605	HIBCH; 3-hydroxyisobutyryl-CoA hydrolase [EC:3.1.2.4]	map00280 Valine, leucine and isoleucine degradation; map00410 beta-Alanine metabolism; map00640 Propanoate metabolism; map01100 Metabolic pathways; map01200 Carbon metabolism		GO:0005622 intracellular; GO:0005623 cell; GO:0005737 cytoplasm; GO:0005829 cytosol; GO:0016020 membrane;				I	KOG1684	Enoyl-CoA hydratase
A0A2G2ZKH9	Cytochrome P450 77A1 OS=Capsicum annuum OX=4072 GN=T459_15498 PE=3 SV=1	T459_15498	1.605	4.59725e-06	Up	48.5	1.256	1.208	1.236	0.758	0.768	0.78	1.054	0.956	1.085	0.99	0.972	0.949	1.028	1.017	0.989	1.005	0.988	0.982	cytoplasm	K21995	CYP77A4; unsaturated fatty acid epoxidase [EC:1.14.-.-]		GO:0006082 organic acid metabolic process; GO:0006629 lipid metabolic process; GO:0006631 fatty acid metabolic process; GO:0008152 metabolic process; GO:0009058 biosynthetic process; GO:0009059 macromolecule biosynthetic process; GO:0009987 cellular process; GO:0010143 cutin biosynthetic process; GO:0019395 fatty acid oxidation; GO:0019748 secondary metabolic process; GO:0019752 carboxylic acid m…	GO:0016020 membrane;	GO:0003824 catalytic activity; GO:0004497 monooxygenase activity; GO:0016491 oxidoreductase activity; GO:0016705 oxidoreductase activity, acting on paired donors, with incorporation or reduction of molecular oxygen; GO:0016709 oxidoreductase activity, acting on paired donors, with incorporation or reduction of molecular oxygen, NAD(P)H as one donor, and incorporation of one atom of oxygen; GO:005…	PF00067	Cytochrome P450	Q	KOG0156	Cytochrome P450 CYP2 subfamily
A0A1U8GJD6	Gibberellin-regulated protein 10 OS=Capsicum annuum OX=4072 GN=T459_13021 PE=4 SV=1	T459_13021	0.603	0.0139133	Down	9.7	0.906	0.72	0.634	1.243	1.114	1.393	0.808	0.935	0.765	1.185	1.178	1.131	1.124	1.127	1.014	0.927	0.939	0.882	extracellular					GO:0005618 cell wall; GO:0005623 cell; GO:0030312 external encapsulating structure; GO:0071944 cell periphery;
A0A1U8G7H2	UDP-glucose 4-epimerase OS=Capsicum annuum OX=4072 GN=T459_00351 PE=3 SV=1	T459_00351	0.647	2.76255e-05	Down	39.2	0.816	0.772	0.772	1.198	1.233	1.219	0.949	1.028	0.996	0.992	0.993	1.015	1.056	1.13	1.059	0.903	0.88	0.922	cytoplasm	K01784	galE, GALE; UDP-glucose 4-epimerase [EC:5.1.3.2]	map00052 Galactose metabolism; map00520 Amino sugar and nucleotide sugar metabolism; map01100 Metabolic pathways	GO:0007275 multicellular organism development; GO:0009555 pollen development; GO:0032501 multicellular organismal process; GO:0032502 developmental process; GO:0048229 gametophyte development; GO:0048856 anatomical structure development;	GO:0005622 intracellular; GO:0005623 cell; GO:0005737 cytoplasm; GO:0005829 cytosol; GO:0005886 plasma membrane; GO:0016020 membrane; GO:0071944 cell periphery;	GO:0003824 catalytic activity; GO:0003978 UDP-glucose 4-epimerase activity; GO:0016853 isomerase activity; GO:0016854 racemase and epimerase activity; GO:0016857 racemase and epimerase activity, acting on carbohydrates and derivatives; GO:0050373 UDP-arabinose 4-epimerase activity;			Q	KOG1371	UDP-glucose 4-epimerase/UDP-sulfoquinovose synthase
A0A2G2ZK80	AB hydrolase-1 domain-containing protein OS=Capsicum annuum OX=4072 GN=T459_15401 PE=4 SV=1	T459_15401	1.515	0.000631087	Up	36.1	1.225	1.26	1.1	0.804	0.786	0.776	1.142	1.171	1.297	0.886	0.79	0.877	1.032	1.125	1.182	0.889	0.901	0.972	cytoplasm							PF12697	Alpha/beta hydrolase family	I	KOG4178	Soluble epoxide hydrolase
A0A1U8FJK4	Protein ASPARTIC PROTEASE IN GUARD CELL 1 OS=Capsicum annuum OX=4072 GN=T459_17610 PE=3 SV=1	T459_17610	0.48	4.06129e-06	Down	52.7	0.65	0.665	0.628	1.321	1.344	1.381	0.983	0.933	0.996	1.075	1.035	0.974	1.253	1.19	1.179	0.781	0.728	0.885	chloroplast	K22683	APF2; aspartyl protease family protein [EC:3.4.23.-]		GO:0001101 response to acid chemical; GO:0002376 immune system process; GO:0006508 proteolysis; GO:0006807 nitrogen compound metabolic process; GO:0006950 response to stress; GO:0006952 defense response; GO:0006955 immune response; GO:0008152 metabolic process; GO:0009056 catabolic process; GO:0009057 macromolecule catabolic process; GO:0009414 response to water deprivation; GO:0009415 response t…	GO:0005622 intracellular; GO:0005623 cell; GO:0005737 cytoplasm; GO:0005783 endoplasmic reticulum; GO:0012505 endomembrane system; GO:0043226 organelle; GO:0043227 membrane-bounded organelle; GO:0043229 intracellular organelle; GO:0043231 intracellular membrane-bounded organelle;	GO:0003824 catalytic activity; GO:0004175 endopeptidase activity; GO:0004190 aspartic-type endopeptidase activity; GO:0008233 peptidase activity; GO:0016787 hydrolase activity; GO:0070001 aspartic-type peptidase activity; GO:0070011 peptidase activity, acting on L-amino acid peptides; GO:0140096 catalytic activity, acting on a protein;			O	KOG1339	Aspartyl protease
A0A1U8DUW6	Nucleolar protein 56 OS=Capsicum annuum OX=4072 GN=T459_33078 PE=4 SV=1	T459_33078	1.332	0.000221259	Up	62	1.148	1.174	1.127	0.886	0.831	0.872	0.965	0.954	0.899	1.09	1.039	1.059	0.94	0.92	0.887	1.086	1.099	1.092	cytoplasm	K14564	NOP56; nucleolar protein 56	map03008 Ribosome biogenesis in eukaryotes				PF08156	NOP5NT (NUC127) domain	AJ	KOG2573	Ribosome biogenesis protein - Nop56p/Sik1p
A0A1U8GAI6	Thioredoxin-like protein CDSP32, chloroplastic OS=Capsicum annuum OX=4072 GN=T459_13440 PE=4 SV=1	T459_13440	0.752	0.000306546	Down	33.6	0.89	0.848	0.838	1.124	1.178	1.122	1.022	1.055	1.037	0.932	1.037	0.959	1.054	1.077	1.063	0.936	0.923	0.942	chloroplast				GO:0001101 response to acid chemical; GO:0006950 response to stress; GO:0006979 response to oxidative stress; GO:0008152 metabolic process; GO:0009414 response to water deprivation; GO:0009415 response to water; GO:0009628 response to abiotic stimulus; GO:0009636 response to toxic substance; GO:0009987 cellular process; GO:0010035 response to inorganic substance; GO:0019725 cellular homeostasis; …	GO:0005622 intracellular; GO:0005623 cell; GO:0005737 cytoplasm; GO:0009507 chloroplast; GO:0009526 plastid envelope; GO:0009532 plastid stroma; GO:0009536 plastid; GO:0009570 chloroplast stroma; GO:0009941 chloroplast envelope; GO:0031967 organelle envelope; GO:0031975 envelope; GO:0043226 organelle; GO:0043227 membrane-bounded organelle; GO:0043229 intracellular organelle; GO:0043231 intracellu…	GO:0003824 catalytic activity; GO:0004791 thioredoxin-disulfide reductase activity; GO:0015035 protein disulfide oxidoreductase activity; GO:0015036 disulfide oxidoreductase activity; GO:0016209 antioxidant activity; GO:0016491 oxidoreductase activity; GO:0016651 oxidoreductase activity, acting on NAD(P)H; GO:0016667 oxidoreductase activity, acting on a sulfur group of donors; GO:0016668 oxidored…	PF00085	Thioredoxin	O	KOG0907	Thioredoxin
A0A2G2YNR0	Fe(2+) transport protein 3, chloroplastic OS=Capsicum annuum OX=4072 GN=T459_26480 PE=3 SV=1	T459_26480	0.325	5.13818e-05	Down	37.5	0.478	0.516	0.482	1.548	1.354	1.634							0.483	0.504	0.417	1.691	1.465	1.432	plasma membrane	K14709	SLC39A1_2_3, ZIP1_2_3; solute carrier family 39 (zinc transporter), member 1/2/3		GO:0000041 transition metal ion transport; GO:0006810 transport; GO:0006811 ion transport; GO:0006812 cation transport; GO:0006826 iron ion transport; GO:0006829 zinc ion transport; GO:0009605 response to external stimulus; GO:0009607 response to biotic stimulus; GO:0009624 response to nematode; GO:0010035 response to inorganic substance; GO:0010038 response to metal ion; GO:0010043 response to z…	GO:0005622 intracellular; GO:0005623 cell; GO:0005737 cytoplasm; GO:0005773 vacuole; GO:0005774 vacuolar membrane; GO:0005886 plasma membrane; GO:0016020 membrane; GO:0031090 organelle membrane; GO:0043226 organelle; GO:0043227 membrane-bounded organelle; GO:0043229 intracellular organelle; GO:0043231 intracellular membrane-bounded organelle; GO:0071944 cell periphery; GO:0098588 bounding membran…	GO:0005215 transporter activity; GO:0005381 iron ion transmembrane transporter activity; GO:0005385 zinc ion transmembrane transporter activity; GO:0008324 cation transmembrane transporter activity; GO:0015075 ion transmembrane transporter activity; GO:0015318 inorganic molecular entity transmembrane transporter activity; GO:0022857 transmembrane transporter activity; GO:0022890 inorganic cation …			P	KOG1558	Fe2+/Zn2+ regulated transporter
A0A2G2Z021	Knot1 domain-containing protein OS=Capsicum annuum OX=4072 GN=T459_18763 PE=3 SV=1	T459_18763	0.259	2.75196e-05	Down	11.1	0.365	0.425	0.445	1.54	1.588	1.647													extracellular							PF00304	Gamma-thionin family
A0A2G3A110	DNA-directed RNA polymerase subunit beta OS=Capsicum annuum OX=4072 GN=T459_10020 PE=3 SV=1	T459_10020	1.347	0.000110171	Up	137.7	1.167	1.17	1.126	0.842	0.883	0.845	0.87	0.918	0.915	1.102	1.114	1.106	0.826	0.822	0.837	1.152	1.176	1.187	cytoplasm	K16252	NRPD2, NRPE2; DNA-directed RNA polymerase IV and V subunit 2 [EC:2.7.7.6]		GO:0002682 regulation of immune system process; GO:0006139 nucleobase-containing compound metabolic process; GO:0006259 DNA metabolic process; GO:0006304 DNA modification; GO:0006305 DNA alkylation; GO:0006306 DNA methylation; GO:0006396 RNA processing; GO:0006725 cellular aromatic compound metabolic process; GO:0006807 nitrogen compound metabolic process; GO:0006950 response to stress; GO:000695…	GO:0000228 nuclear chromosome; GO:0000418 RNA polymerase IV complex; GO:0000419 RNA polymerase V complex; GO:0000428 DNA-directed RNA polymerase complex; GO:0000785 chromatin; GO:0000790 nuclear chromatin; GO:0000792 heterochromatin; GO:0005622 intracellular; GO:0005623 cell; GO:0005634 nucleus; GO:0005654 nucleoplasm; GO:0005694 chromosome; GO:0005720 nuclear heterochromatin; GO:0005730 nucleolu…	GO:0003824 catalytic activity; GO:0003899 DNA-directed 5'-3' RNA polymerase activity; GO:0016740 transferase activity; GO:0016772 transferase activity, transferring phosphorus-containing groups; GO:0016779 nucleotidyltransferase activity; GO:0034062 5'-3' RNA polymerase activity; GO:0097747 RNA polymerase activity; GO:0140098 catalytic activity, acting on RNA;	PF04561; PF04565; PF04566; PF04567; PF00562; PF04560	RNA polymerase Rpb2, domain 2; RNA polymerase Rpb2, domain 3; RNA polymerase Rpb2, domain 4; RNA polymerase Rpb2, domain 5; RNA polymerase Rpb2, domain 6; RNA polymerase Rpb2, domain 7	K	KOG0214	RNA polymerase II, second largest subunit
A0A1U8FZR8	pentatricopeptide repeat-containing protein At3g02490, mitochondrial-like(predicted) OS=Capsicum annuum OX=4072 GN=T459_06795 PE=4 SV=1	T459_06795	1.305	2.02012e-05	Up	74	1.138	1.133	1.12	0.852	0.864	0.883	0.924	0.972	0.999	1.062	1.046	1.064	0.82	0.893	0.884	1.127	1.175	1.143	chloroplast				GO:0006139 nucleobase-containing compound metabolic process; GO:0006396 RNA processing; GO:0006725 cellular aromatic compound metabolic process; GO:0006807 nitrogen compound metabolic process; GO:0008152 metabolic process; GO:0008380 RNA splicing; GO:0009451 RNA modification; GO:0009987 cellular process; GO:0010467 gene expression; GO:0016070 RNA metabolic process; GO:0034641 cellular nitrogen co…	GO:0005622 intracellular; GO:0005623 cell; GO:0005737 cytoplasm; GO:0005739 mitochondrion; GO:0043226 organelle; GO:0043227 membrane-bounded organelle; GO:0043229 intracellular organelle; GO:0043231 intracellular membrane-bounded organelle;	GO:0003676 nucleic acid binding; GO:0003723 RNA binding; GO:0003824 catalytic activity; GO:0004518 nuclease activity; GO:0004519 endonuclease activity; GO:0005488 binding; GO:0016787 hydrolase activity; GO:0016788 hydrolase activity, acting on ester bonds; GO:0097159 organic cyclic compound binding; GO:1901363 heterocyclic compound binding;			S	KOG4197	FOG: PPR repeat
A0A2G2YER6	Vignain OS=Capsicum annuum OX=4072 GN=T459_27722 PE=3 SV=1	T459_27722	0.534	1.72947e-06	Down	45.2	0.686	0.7	0.704	1.284	1.336	1.293	0.999	0.966	0.972	1.048	1.025	1.063							endoplasmic reticulum	K16292	CEP, CYSEP; KDEL-tailed cysteine endopeptidase [EC:3.4.22.-]			GO:0005622 intracellular; GO:0005623 cell; GO:0005737 cytoplasm; GO:0005783 endoplasmic reticulum; GO:0005788 endoplasmic reticulum lumen; GO:0012505 endomembrane system; GO:0031974 membrane-enclosed lumen; GO:0043226 organelle; GO:0043227 membrane-bounded organelle; GO:0043229 intracellular organelle; GO:0043231 intracellular membrane-bounded organelle; GO:0043233 organelle lumen; GO:0070013 int…		PF08246; PF00112	Cathepsin propeptide inhibitor domain (I29); Papain family cysteine protease	O	KOG1543	Cysteine proteinase Cathepsin L
A0A2G3AIE5	beta-glucosidase BoGH3B-like(predicted) OS=Capsicum annuum OX=4072 GN=T459_01893 PE=4 SV=1	T459_01893	2.082	0.00717868	Up	37.5	1.469	1.263	1.323	0.604	0.513	0.831													extracellular	K05349	bglX; beta-glucosidase [EC:3.2.1.21]	map00460 Cyanoamino acid metabolism; map00500 Starch and sucrose metabolism; map00940 Phenylpropanoid biosynthesis; map01100 Metabolic pathways; map01110 Biosynthesis of secondary metabolites	GO:0000272 polysaccharide catabolic process; GO:0005975 carbohydrate metabolic process; GO:0005976 polysaccharide metabolic process; GO:0008152 metabolic process; GO:0009056 catabolic process; GO:0009057 macromolecule catabolic process; GO:0009251 glucan catabolic process; GO:0016052 carbohydrate catabolic process; GO:0043170 macromolecule metabolic process; GO:0044042 glucan metabolic process; G…	GO:0005623 cell; GO:0005886 plasma membrane; GO:0016020 membrane; GO:0042597 periplasmic space; GO:0071944 cell periphery;	GO:0003824 catalytic activity; GO:0004553 hydrolase activity, hydrolyzing O-glycosyl compounds; GO:0008422 beta-glucosidase activity; GO:0015926 glucosidase activity; GO:0016787 hydrolase activity; GO:0016798 hydrolase activity, acting on glycosyl bonds;	PF00933; PF01915	Glycosyl hydrolase family 3 N terminal domain; Glycosyl hydrolase family 3 C-terminal domain
A0A1U8F588	Cytochrome OS=Capsicum annuum OX=4072 GN=T459_30270 PE=3 SV=1	T459_30270	1.347	0.000170686	Up	57	1.168	1.165	1.099	0.865	0.84	0.843	1.022	0.997	1.024	1	0.941	0.994	1.014	1.013	1.031	0.977	0.949	0.999	chloroplast	K20562	CYP736A; biphenyl-4-hydroxylase		GO:0008152 metabolic process; GO:0009058 biosynthetic process; GO:0009719 response to endogenous stimulus; GO:0009725 response to hormone; GO:0009733 response to auxin; GO:0010033 response to organic substance; GO:0019748 secondary metabolic process; GO:0042221 response to chemical; GO:0044550 secondary metabolite biosynthetic process; GO:0050896 response to stimulus;	GO:0005622 intracellular; GO:0005623 cell; GO:0005737 cytoplasm; GO:0005783 endoplasmic reticulum; GO:0005789 endoplasmic reticulum membrane; GO:0012505 endomembrane system; GO:0016020 membrane; GO:0031090 organelle membrane; GO:0031984 organelle subcompartment; GO:0042175 nuclear outer membrane-endoplasmic reticulum membrane network; GO:0043226 organelle; GO:0043227 membrane-bounded organelle; G…		PF00067	Cytochrome P450	Q	KOG0156	Cytochrome P450 CYP2 subfamily
A0A1U8DVF8	60S ribosomal protein L3 OS=Capsicum annuum OX=4072 GN=T459_32459 PE=3 SV=1	T459_32459	1.438	0.000454192	Up	44.3	1.197	1.224	1.116	0.787	0.838	0.834	1.055	1.035	1.016	0.939	0.997	0.972	0.892	0.918	0.891	1.143	1.136	1.069	cytoplasm	K02925	RP-L3e, RPL3; large subunit ribosomal protein L3e	map03010 Ribosome						J	KOG0746	60S ribosomal protein L3 and related proteins
A0A1U8FN56	Pyridoxal phosphate homeostasis protein OS=Capsicum annuum OX=4072 GN=T459_05916 PE=3 SV=1	T459_05916	0.746	0.00459958	Down	30.3	0.874	0.909	0.784	1.092	1.154	1.194	0.99	1.07	0.961	1.008	1.032	0.993	0.99	1.052	1.025	1.009	1.006	0.985	chloroplast	K06997	yggS, PROSC; PLP dependent protein					PF01168	Alanine racemase, N-terminal domain	E	KOG3157	Proline synthetase co-transcribed protein
A0A2G2YK70	Pentatricopeptide repeat-containing protein, mitochondrial OS=Capsicum annuum OX=4072 GN=T459_25241 PE=4 SV=1	T459_25241	1.344	8.38731e-05	Up	45.9	1.152	1.117	1.173	0.844	0.844	0.873	0.994	1.056	1.061	0.974	0.883	1.04	0.784	0.82	0.78	1.29	1.188	1.14	chloroplast				GO:0006139 nucleobase-containing compound metabolic process; GO:0006725 cellular aromatic compound metabolic process; GO:0006807 nitrogen compound metabolic process; GO:0008152 metabolic process; GO:0009451 RNA modification; GO:0009987 cellular process; GO:0016070 RNA metabolic process; GO:0034641 cellular nitrogen compound metabolic process; GO:0043170 macromolecule metabolic process; GO:0043412…	GO:0005622 intracellular; GO:0005623 cell; GO:0043226 organelle; GO:0043227 membrane-bounded organelle; GO:0043229 intracellular organelle; GO:0043231 intracellular membrane-bounded organelle;	GO:0003676 nucleic acid binding; GO:0003723 RNA binding; GO:0003824 catalytic activity; GO:0004518 nuclease activity; GO:0004519 endonuclease activity; GO:0005488 binding; GO:0016787 hydrolase activity; GO:0016788 hydrolase activity, acting on ester bonds; GO:0097159 organic cyclic compound binding; GO:1901363 heterocyclic compound binding;			S	KOG4197	FOG: PPR repeat
A0A2G2YEX8	Alpha-glucan water dikinase, chloroplastic OS=Capsicum annuum OX=4072 GN=T459_27784 PE=4 SV=1	T459_27784	1.339	0.000105718	Up	144.3	1.168	1.128	1.129	0.83	0.875	0.852	0.963	0.952	0.994	1.012	1.04	1.039	0.921	0.886	0.883	1.142	1.125	1.068	cytoplasm	K08244	R1; alpha-glucan, water dikinase [EC:2.7.9.4]		GO:0000272 polysaccharide catabolic process; GO:0005975 carbohydrate metabolic process; GO:0005976 polysaccharide metabolic process; GO:0005982 starch metabolic process; GO:0005983 starch catabolic process; GO:0006073 cellular glucan metabolic process; GO:0006793 phosphorus metabolic process; GO:0006796 phosphate-containing compound metabolic process; GO:0006950 response to stress; GO:0008152 met…	GO:0005622 intracellular; GO:0005623 cell; GO:0005737 cytoplasm; GO:0005739 mitochondrion; GO:0009507 chloroplast; GO:0009526 plastid envelope; GO:0009532 plastid stroma; GO:0009536 plastid; GO:0009570 chloroplast stroma; GO:0009941 chloroplast envelope; GO:0031967 organelle envelope; GO:0031975 envelope; GO:0043226 organelle; GO:0043227 membrane-bounded organelle; GO:0043229 intracellular organe…	GO:0003824 catalytic activity; GO:0016301 kinase activity; GO:0016740 transferase activity; GO:0016772 transferase activity, transferring phosphorus-containing groups; GO:0016781 phosphotransferase activity, paired acceptors; GO:0050521 alpha-glucan, water dikinase activity;
A0A2G3AN14	putative late blight resistance protein homolog R1A-3(predicted) OS=Capsicum annuum OX=4072 GN=T459_03491 PE=3 SV=1	T459_03491	1.362	0.00143071	Up	105.5	1.105	1.202	1.146	0.832	0.896	0.807	1.043	0.925	1.058	0.964	0.948	1.013	1.005	1.068	0.944	1.03	0.973	0.99	plasma membrane							PF00931	NB-ARC domain	T	KOG4658	Apoptotic ATPase
A0A1U8GZM4	26S proteasome non-ATPase regulatory subunit 13-like protein B OS=Capsicum annuum OX=4072 GN=T459_15237 PE=4 SV=1	T459_15237	1.316	1.06394e-05	Up	44.1	1.147	1.145	1.114	0.858	0.863	0.868	1.011	0.962	1	1.015	1.013	1.048	0.87	0.919	0.85	1.156	1.17	1.108	cytoplasm	K03039	PSMD13, RPN9; 26S proteasome regulatory subunit N9	map03050 Proteasome	GO:0006508 proteolysis; GO:0006511 ubiquitin-dependent protein catabolic process; GO:0006807 nitrogen compound metabolic process; GO:0008152 metabolic process; GO:0009056 catabolic process; GO:0009057 macromolecule catabolic process; GO:0009987 cellular process; GO:0016043 cellular component organization; GO:0019538 protein metabolic process; GO:0019941 modification-dependent protein catabolic pr…	GO:0000502 proteasome complex; GO:0005622 intracellular; GO:0005623 cell; GO:0005634 nucleus; GO:0005737 cytoplasm; GO:0005829 cytosol; GO:0005838 proteasome regulatory particle; GO:0008541 proteasome regulatory particle, lid subcomplex; GO:0022624 proteasome accessory complex; GO:0032991 protein-containing complex; GO:0043226 organelle; GO:0043227 membrane-bounded organelle; GO:0043229 intracell…	GO:0005198 structural molecule activity;	PF01399	PCI domain	O	KOG2908	26S proteasome regulatory complex, subunit RPN9/PSMD13
A0A1U8GFH3	acid phosphatase 1-like(predicted) OS=Capsicum annuum OX=4072 GN=T459_11037 PE=4 SV=1	T459_11037	0.695	0.000457684	Down	29.5	0.838	0.809	0.83	1.228	1.223	1.111													chloroplast				GO:0001101 response to acid chemical; GO:0002213 defense response to insect; GO:0006793 phosphorus metabolic process; GO:0006796 phosphate-containing compound metabolic process; GO:0006950 response to stress; GO:0006952 defense response; GO:0006979 response to oxidative stress; GO:0008152 metabolic process; GO:0009605 response to external stimulus; GO:0009607 response to biotic stimulus; GO:00096…	GO:0005622 intracellular; GO:0005623 cell; GO:0005737 cytoplasm; GO:0005773 vacuole; GO:0005829 cytosol; GO:0005840 ribosome; GO:0022626 cytosolic ribosome; GO:0032991 protein-containing complex; GO:0043226 organelle; GO:0043227 membrane-bounded organelle; GO:0043228 non-membrane-bounded organelle; GO:0043229 intracellular organelle; GO:0043231 intracellular membrane-bounded organelle; GO:0043232…	GO:0003824 catalytic activity; GO:0003993 acid phosphatase activity; GO:0005488 binding; GO:0005515 protein binding; GO:0008134 transcription factor binding; GO:0016787 hydrolase activity; GO:0016788 hydrolase activity, acting on ester bonds; GO:0016791 phosphatase activity; GO:0042578 phosphoric ester hydrolase activity;
A0A1U8H3F0	Omega-3 fatty acid desaturase, chloroplastic OS=Capsicum annuum OX=4072 GN=T459_16317 PE=4 SV=1	T459_16317	1.403	0.00106525	Up	50.1	1.2	1.207	1.1	0.86	0.849	0.79	1.158	1.145	0.966	0.957	0.941	0.846	0.999	1.077	1.006	0.972	1.014	0.942	chloroplast	K10257	FAD3, FAD7, FAD8, desB; acyl-lipid omega-3 desaturase [EC:1.14.19.25 1.14.19.35 1.14.19.36]		GO:0006082 organic acid metabolic process; GO:0006629 lipid metabolic process; GO:0006631 fatty acid metabolic process; GO:0006633 fatty acid biosynthetic process; GO:0006950 response to stress; GO:0008152 metabolic process; GO:0008610 lipid biosynthetic process; GO:0009058 biosynthetic process; GO:0009266 response to temperature stimulus; GO:0009409 response to cold; GO:0009628 response to abiot…	GO:0005622 intracellular; GO:0005623 cell; GO:0005737 cytoplasm; GO:0009507 chloroplast; GO:0009526 plastid envelope; GO:0009536 plastid; GO:0009941 chloroplast envelope; GO:0016020 membrane; GO:0031090 organelle membrane; GO:0031967 organelle envelope; GO:0031975 envelope; GO:0042170 plastid membrane; GO:0043226 organelle; GO:0043227 membrane-bounded organelle; GO:0043229 intracellular organelle…	GO:0003824 catalytic activity; GO:0016491 oxidoreductase activity; GO:0016705 oxidoreductase activity, acting on paired donors, with incorporation or reduction of molecular oxygen; GO:0042389 omega-3 fatty acid desaturase activity;	PF00487	Fatty acid desaturase
A0A1U8F6F3	C2 domain-containing protein OS=Capsicum annuum OX=4072 GN=T459_30219 PE=4 SV=1	T459_30219	0.712	0.00168507	Down	18.7	0.847	0.779	0.872	1.189	1.218	1.102	0.936	0.929	0.929	1.034	1.019	1.058	0.851	0.897	1.059	1.015	1.062	1.076	nucleus				GO:0002682 regulation of immune system process; GO:0002684 positive regulation of immune system process; GO:0002831 regulation of response to biotic stimulus; GO:0002833 positive regulation of response to biotic stimulus; GO:0006950 response to stress; GO:0006970 response to osmotic stress; GO:0009611 response to wounding; GO:0009628 response to abiotic stimulus; GO:0009651 response to salt stres…	GO:0005622 intracellular; GO:0005623 cell; GO:0005634 nucleus; GO:0005737 cytoplasm; GO:0005829 cytosol; GO:0005886 plasma membrane; GO:0016020 membrane; GO:0043226 organelle; GO:0043227 membrane-bounded organelle; GO:0043229 intracellular organelle; GO:0043231 intracellular membrane-bounded organelle; GO:0071944 cell periphery;	GO:0005096 GTPase activator activity; GO:0005488 binding; GO:0005543 phospholipid binding; GO:0008047 enzyme activator activity; GO:0008289 lipid binding; GO:0030234 enzyme regulator activity; GO:0030695 GTPase regulator activity; GO:0043167 ion binding; GO:0043168 anion binding; GO:0060589 nucleoside-triphosphatase regulator activity; GO:0098772 molecular function regulator;	PF00168	C2 domain	S	KOG1030	Predicted Ca2+-dependent phospholipid-binding protein
A0A1U8FXJ4	DNA-directed RNA polymerase subunit OS=Capsicum annuum OX=4072 GN=T459_06135 PE=3 SV=1	T459_06135	1.305	0.000553137	Up	205.2	1.17	1.106	1.133	0.835	0.888	0.89	0.979	0.964	0.982	1.036	1.014	1.005	0.878	0.916	0.933	1.082	1.123	1.1	nucleus	K03006	RPB1, POLR2A; DNA-directed RNA polymerase II subunit RPB1 [EC:2.7.7.6]	map03020 RNA polymerase	GO:0006139 nucleobase-containing compound metabolic process; GO:0006725 cellular aromatic compound metabolic process; GO:0006807 nitrogen compound metabolic process; GO:0008152 metabolic process; GO:0009058 biosynthetic process; GO:0009059 macromolecule biosynthetic process; GO:0009987 cellular process; GO:0016070 RNA metabolic process; GO:0018130 heterocycle biosynthetic process; GO:0019438 arom…	GO:0000428 DNA-directed RNA polymerase complex; GO:0005622 intracellular; GO:0005623 cell; GO:0005634 nucleus; GO:0005654 nucleoplasm; GO:0005665 RNA polymerase II, core complex; GO:0005737 cytoplasm; GO:0005773 vacuole; GO:0005911 cell-cell junction; GO:0009506 plasmodesma; GO:0009507 chloroplast; GO:0009536 plastid; GO:0016591 RNA polymerase II, holoenzyme; GO:0030054 cell junction; GO:0030880 …	GO:0003676 nucleic acid binding; GO:0003677 DNA binding; GO:0003824 catalytic activity; GO:0003899 DNA-directed 5'-3' RNA polymerase activity; GO:0005488 binding; GO:0016740 transferase activity; GO:0016772 transferase activity, transferring phosphorus-containing groups; GO:0016779 nucleotidyltransferase activity; GO:0034062 5'-3' RNA polymerase activity; GO:0097159 organic cyclic compound bindin…	PF04997; PF00623; PF04983; PF05000; PF04998; PF04992; PF04990	RNA polymerase Rpb1, domain 1; RNA polymerase Rpb1, domain 2; RNA polymerase Rpb1, domain 3; RNA polymerase Rpb1, domain 4; RNA polymerase Rpb1, domain 5; RNA polymerase Rpb1, domain 6; RNA polymerase Rpb1, domain 7	K	KOG0260	RNA polymerase II, large subunit
A0A1U8GTV8	LRR receptor-like serine/threonine-protein kinase FLS2(predicted) OS=Capsicum annuum OX=4072 GN=T459_14847 PE=4 SV=1	T459_14847	0.699	3.1152e-05	Down	45.4	0.798	0.82	0.845	1.171	1.186	1.168	1.091	1.107	1.076	0.877	0.869	0.929							vacuolar membrane									S	KOG0619	FOG: Leucine rich repeat
A0A1U8FB32	Heparanase-like protein 3 OS=Capsicum annuum OX=4072 GN=T459_19018 PE=4 SV=1	T459_19018	0.715	2.99005e-05	Down	59.6	0.817	0.84	0.846	1.194	1.148	1.159	1.054	1.024	1.037	0.954	0.994	0.976	1.108	1.12	1.15	0.868	0.9	0.844	plasma membrane	K07964	HPSE; heparanase [EC:3.2.1.166]	map00531 Glycosaminoglycan degradation; map01100 Metabolic pathways		GO:0005618 cell wall; GO:0005623 cell; GO:0009505 plant-type cell wall; GO:0030312 external encapsulating structure; GO:0071944 cell periphery;	GO:0003824 catalytic activity; GO:0004553 hydrolase activity, hydrolyzing O-glycosyl compounds; GO:0004566 beta-glucuronidase activity; GO:0016787 hydrolase activity; GO:0016798 hydrolase activity, acting on glycosyl bonds;	PF03662	Glycosyl hydrolase family 79, N-terminal domain
A0A2G2Z850	Phosphoinositide phospholipase C OS=Capsicum annuum OX=4072 GN=T459_16234 PE=4 SV=1	T459_16234	1.338	5.63286e-05	Up	66.7	1.192	1.138	1.155	0.856	0.867	0.882	0.927	0.961	1.155	1.035	0.932	0.996	0.872	0.92	1.045	0.966	1.011	1.189	mitochondria	K05857	PLCD; phosphatidylinositol phospholipase C, delta [EC:3.1.4.11]	map00562 Inositol phosphate metabolism; map01100 Metabolic pathways; map04070 Phosphatidylinositol signaling system; map04933 AGE-RAGE signaling pathway in diabetic complications				PF09279; PF00168	Phosphoinositide-specific phospholipase C, efhand-like; C2 domain	I	KOG0169	Phosphoinositide-specific phospholipase C
A0A1U8EV24	ABC1 domain-containing protein OS=Capsicum annuum OX=4072 GN=T459_30089 PE=4 SV=1	T459_30089	1.408	0.00826444	Up	85.9	1.152	1.154	1.205	0.856	0.914	0.723	0.928	0.87	0.87	1.178	1.039	1.117							chloroplast				GO:0000302 response to reactive oxygen species; GO:0006629 lipid metabolic process; GO:0006643 membrane lipid metabolic process; GO:0006950 response to stress; GO:0006979 response to oxidative stress; GO:0007275 multicellular organism development; GO:0007568 aging; GO:0007623 circadian rhythm; GO:0008152 metabolic process; GO:0008610 lipid biosynthetic process; GO:0009058 biosynthetic process; GO…	GO:0005622 intracellular; GO:0005623 cell; GO:0005737 cytoplasm; GO:0009507 chloroplast; GO:0009526 plastid envelope; GO:0009536 plastid; GO:0009941 chloroplast envelope; GO:0031967 organelle envelope; GO:0031975 envelope; GO:0043226 organelle; GO:0043227 membrane-bounded organelle; GO:0043229 intracellular organelle; GO:0043231 intracellular membrane-bounded organelle;	GO:0005215 transporter activity;			S	KOG1235	Predicted unusual protein kinase
A0A2G2YPR7	Polyadenylate-binding protein OS=Capsicum annuum OX=4072 GN=T459_22515 PE=3 SV=1	T459_22515	0.71	1.49319e-05	Down	67.6	0.814	0.833	0.849	1.184	1.173	1.159													chloroplast	K13126	PABPC; polyadenylate-binding protein	map03013 RNA transport; map03015 mRNA surveillance pathway; map03018 RNA degradation				PF00076	RNA recognition motif. (a.k.a. RRM, RBD, or RNP domain)	AJ	KOG0123	Polyadenylate-binding protein (RRM superfamily)
A0A1U8E5R9	Metallothionein-like protein type 2 OS=Capsicum annuum OX=4072 GN=T459_22986 PE=4 SV=1	T459_22986	1.508	1.41545e-05	Up	8.2	1.194	1.218	1.198	0.786	0.822	0.786	1.422	1.363	1.348	0.608	0.631	0.647							chloroplast									S	KOG4738	Predicted metallothionein
A0A2G3A8V6	alpha-farnesene synthase-like(predicted) OS=Capsicum annuum OX=4072 GN=T459_05726 PE=3 SV=1	T459_05726	1.44	0.00064098	Up	49.5	1.13	1.26	1.154	0.809	0.803	0.849							0.927	0.957	0.876	1.038	1.105	1.103	chloroplast	K14173	AFS1; alpha-farnesene synthase [EC:4.2.3.46]	map00909 Sesquiterpenoid and triterpenoid biosynthesis; map01110 Biosynthesis of secondary metabolites	GO:0006629 lipid metabolic process; GO:0006720 isoprenoid metabolic process; GO:0008152 metabolic process; GO:0008299 isoprenoid biosynthetic process; GO:0008610 lipid biosynthetic process; GO:0009058 biosynthetic process; GO:0009987 cellular process; GO:0042214 terpene metabolic process; GO:0044237 cellular metabolic process; GO:0044238 primary metabolic process; GO:0044249 cellular biosynthetic…		GO:0003824 catalytic activity; GO:0010333 terpene synthase activity; GO:0010334 sesquiterpene synthase activity; GO:0016829 lyase activity; GO:0016835 carbon-oxygen lyase activity; GO:0016838 carbon-oxygen lyase activity, acting on phosphates;	PF01397; PF03936	Terpene synthase, N-terminal domain; Terpene synthase family, metal binding domain
A0A2G2ZA81	tubulin--tyrosine ligase-like protein 12(predicted) OS=Capsicum annuum OX=4072 GN=T459_16969 PE=4 SV=1	T459_16969	1.306	0.00980753	Up	94.8	1.088	1.188	1.14	0.796	0.865	0.954	0.998	0.982	1.052	1.012	0.962	1	0.914	0.885	0.963	1.108	1.001	1.134	nucleus	K16609	TTLL12; tubulin--tyrosine ligase-like protein 12							O	KOG2155	Tubulin-tyrosine ligase-related protein
A0A2G2YXR7	Eukaryotic translation initiation factor 3 subunit L(predicted) OS=Capsicum annuum OX=4072 GN=T459_21698 PE=4 SV=1	T459_21698	1.99	0.000325178	Up	33.6	1.277	1.399	1.319	0.712	0.6	0.696	0.805	1.051	0.842	1.277	1.065	0.964	0.923	0.992	0.863	0.918	1.113	1.197	nucleus	K15029	EIF3L; translation initiation factor 3 subunit L							J	KOG3677	RNA polymerase I-associated factor - PAF67
A0A2G3A9I3	Putative splicing factor 3A subunit 1 OS=Capsicum annuum OX=4072 GN=T459_06000 PE=4 SV=1	T459_06000	1.462	0.00286612	Up	87.3	1.267	1.134	1.165	0.855	0.847	0.737													cytoplasm	K12825	SF3A1, SAP114; splicing factor 3A subunit 1	map03040 Spliceosome	GO:0000245 spliceosomal complex assembly; GO:0000375 RNA splicing, via transesterification reactions; GO:0000377 RNA splicing, via transesterification reactions with bulged adenosine as nucleophile; GO:0000381 regulation of alternative mRNA splicing, via spliceosome; GO:0000389 mRNA 3'-splice site recognition; GO:0000398 mRNA splicing, via spliceosome; GO:0006139 nucleobase-containing compound me…	GO:0005622 intracellular; GO:0005623 cell; GO:0005634 nucleus; GO:0005681 spliceosomal complex; GO:0005684 U2-type spliceosomal complex; GO:0005686 U2 snRNP; GO:0030532 small nuclear ribonucleoprotein complex; GO:0032991 protein-containing complex; GO:0043226 organelle; GO:0043227 membrane-bounded organelle; GO:0043229 intracellular organelle; GO:0043231 intracellular membrane-bounded organelle; …	GO:0003676 nucleic acid binding; GO:0003723 RNA binding; GO:0005488 binding; GO:0097159 organic cyclic compound binding; GO:1901363 heterocyclic compound binding;	PF00240	Ubiquitin family	A	KOG0007	Splicing factor 3a, subunit 1
A0A2G2ZRJ0	MRG domain-containing protein OS=Capsicum annuum OX=4072 GN=T459_13041 PE=4 SV=1	T459_13041	1.428	0.0011993	Up	37.1	1.13	1.262	1.14	0.82	0.791	0.862													nucleus	K11339	MORF4L1, MRG15, EAF3; mortality factor 4-like protein 1		GO:0006325 chromatin organization; GO:0006338 chromatin remodeling; GO:0006342 chromatin silencing; GO:0006355 regulation of transcription, DNA-templated; GO:0006464 cellular protein modification process; GO:0006473 protein acetylation; GO:0006475 internal protein amino acid acetylation; GO:0006476 protein deacetylation; GO:0006807 nitrogen compound metabolic process; GO:0006996 organelle organiz…	GO:0000123 histone acetyltransferase complex; GO:0005622 intracellular; GO:0005623 cell; GO:0005634 nucleus; GO:0005654 nucleoplasm; GO:0031248 protein acetyltransferase complex; GO:0031974 membrane-enclosed lumen; GO:0031981 nuclear lumen; GO:0032991 protein-containing complex; GO:0035267 NuA4 histone acetyltransferase complex; GO:0043189 H4/H2A histone acetyltransferase complex; GO:0043226 orga…	GO:0003682 chromatin binding; GO:0005488 binding; GO:1990188 euchromatin binding;			BK	KOG3001	Dosage compensation regulatory complex/histone acetyltransferase complex, subunit MSL-3/MRG15/EAF3, and related CHROMO domain-containing proteins
A0A1U8H1U6	Iron-sulfur protein NUBPL OS=Capsicum annuum OX=4072 GN=T459_18485 PE=3 SV=1	T459_18485	0.637	0.000711978	Down	32.1	0.711	0.804	0.822	1.233	1.253	1.184	1.037	1.033	1.101	1.045	0.882	0.911							mitochondria	K03593	mrp, NUBPL; ATP-binding protein involved in chromosome partitioning							D	KOG3022	Predicted ATPase, nucleotide-binding
A0A2G2YC21	Importin N-terminal domain-containing protein OS=Capsicum annuum OX=4072 GN=T459_26785 PE=4 SV=1	T459_26785	1.362	0.0057195	Up	9.9	1.205	1.056	1.201	0.793	0.902	0.847	0.977	0.998	1.008	1.066	1.018	0.94							chloroplast				GO:0006810 transport; GO:0008104 protein localization; GO:0015031 protein transport; GO:0015833 peptide transport; GO:0033036 macromolecule localization; GO:0042886 amide transport; GO:0045184 establishment of protein localization; GO:0051179 localization; GO:0051234 establishment of localization; GO:0071702 organic substance transport; GO:0071705 nitrogen compound transport;	GO:0001650 fibrillar center; GO:0005622 intracellular; GO:0005623 cell; GO:0005634 nucleus; GO:0005635 nuclear envelope; GO:0005730 nucleolus; GO:0005737 cytoplasm; GO:0005829 cytosol; GO:0012505 endomembrane system; GO:0031967 organelle envelope; GO:0031974 membrane-enclosed lumen; GO:0031975 envelope; GO:0031981 nuclear lumen; GO:0043226 organelle; GO:0043227 membrane-bounded organelle; GO:0043…	GO:0005215 transporter activity;			UY	KOG1993	Nuclear transport receptor KAP120 (importin beta superfamily)
A0A1U8GIC5	SPX domain-containing membrane protein OS=Capsicum annuum OX=4072 GN=T459_00392 PE=4 SV=1	T459_00392	1.346	0.00129359	Up	78.2	1.099	1.144	1.198	0.842	0.818	0.897	0.943	0.952	0.991	1.06	1.092	1.004	0.905	0.884	0.89	1.109	1.089	1.068	plasma membrane				GO:0006810 transport; GO:0006811 ion transport; GO:0006817 phosphate ion transport; GO:0006820 anion transport; GO:0015698 inorganic anion transport; GO:0051179 localization; GO:0051234 establishment of localization;	GO:0000325 plant-type vacuole; GO:0005622 intracellular; GO:0005623 cell; GO:0005737 cytoplasm; GO:0005773 vacuole; GO:0005774 vacuolar membrane; GO:0009705 plant-type vacuole membrane; GO:0016020 membrane; GO:0031090 organelle membrane; GO:0043226 organelle; GO:0043227 membrane-bounded organelle; GO:0043229 intracellular organelle; GO:0043231 intracellular membrane-bounded organelle; GO:0098588 …		PF03105	SPX domain	P	KOG2325	Predicted transporter/transmembrane protein
A0A2G2ZJ86	FCP1 homology domain-containing protein OS=Capsicum annuum OX=4072 GN=T459_15067 PE=4 SV=1	T459_15067	1.32	0.000282172	Up	25.9	1.16	1.138	1.119	0.869	0.89	0.829							0.845	1.003	0.93	1.053	1.019	1.154	chloroplast	K15731	CTDSP; carboxy-terminal domain RNA polymerase II polypeptide A small phosphatase [EC:3.1.3.16]		GO:0006464 cellular protein modification process; GO:0006470 protein dephosphorylation; GO:0006793 phosphorus metabolic process; GO:0006796 phosphate-containing compound metabolic process; GO:0006807 nitrogen compound metabolic process; GO:0008152 metabolic process; GO:0009987 cellular process; GO:0016311 dephosphorylation; GO:0019538 protein metabolic process; GO:0036211 protein modification pro…		GO:0003824 catalytic activity; GO:0004721 phosphoprotein phosphatase activity; GO:0016787 hydrolase activity; GO:0016788 hydrolase activity, acting on ester bonds; GO:0016791 phosphatase activity; GO:0042578 phosphoric ester hydrolase activity; GO:0140096 catalytic activity, acting on a protein;			K	KOG1605	TFIIF-interacting CTD phosphatase, including NLI-interacting factor (involved in RNA polymerase II regulation)
A0A2G3AJ31	importin beta-like SAD2 homolog(predicted) OS=Capsicum annuum OX=4072 GN=T459_02055 PE=4 SV=1	T459_02055	1.32	0.000200048	Up	114.7	1.083	1.153	1.137	0.865	0.837	0.854	1.059	1.067	0.954	0.996	0.986	0.947							nucleus
A0A2G3A546	Twinkle-like protein, chloroplastic/mitochondrial OS=Capsicum annuum OX=4072 GN=T459_04424 PE=4 SV=1	T459_04424	1.342	1.84921e-05	Up	42.7	1.166	1.124	1.151	0.865	0.851	0.848	0.87	1.03	0.945	0.995	1.079	1.085	0.713	0.846	0.811	1.254	1.192	1.185	chloroplast	K17680	PEO1; twinkle protein [EC:3.6.4.12]		GO:0006139 nucleobase-containing compound metabolic process; GO:0006259 DNA metabolic process; GO:0006260 DNA replication; GO:0006261 DNA-dependent DNA replication; GO:0006269 DNA replication, synthesis of RNA primer; GO:0006725 cellular aromatic compound metabolic process; GO:0006753 nucleoside phosphate metabolic process; GO:0006793 phosphorus metabolic process; GO:0006796 phosphate-containing …		GO:0003676 nucleic acid binding; GO:0003677 DNA binding; GO:0003678 DNA helicase activity; GO:0003697 single-stranded DNA binding; GO:0003824 catalytic activity; GO:0003896 DNA primase activity; GO:0003899 DNA-directed 5'-3' RNA polymerase activity; GO:0004386 helicase activity; GO:0005488 binding; GO:0008094 DNA-dependent ATPase activity; GO:0016462 pyrophosphatase activity; GO:0016740 transfera…	PF13662	Toprim domain
A0A2G3AIK1	Peptidase A1 domain-containing protein OS=Capsicum annuum OX=4072 GN=T459_01943 PE=3 SV=1	T459_01943	1.32	0.000132409	Up	47.9	1.096	1.159	1.156	0.869	0.852	0.864	1.147	1.139	1.129	0.878	0.861	0.905	1.23	1.268	1.174	0.782	0.752	0.804	vacuolar membrane									O	KOG1339	Aspartyl protease
A0A2G3AA58	Cold shock domain-containing protein 3 OS=Capsicum annuum OX=4072 GN=T459_06218 PE=4 SV=1	T459_06218	0.763	0.000395158	Down	22.8	0.837	0.9	0.881	1.128	1.172	1.132	0.989	0.933	0.909	1.056	1.019	1.049	0.692	0.758	0.688	1.305	1.312	1.244	cytoplasm	K09250	CNBP; cellular nucleic acid-binding protein		GO:0000902 cell morphogenesis; GO:0001101 response to acid chemical; GO:0006139 nucleobase-containing compound metabolic process; GO:0006725 cellular aromatic compound metabolic process; GO:0006807 nitrogen compound metabolic process; GO:0006950 response to stress; GO:0006970 response to osmotic stress; GO:0006996 organelle organization; GO:0008152 metabolic process; GO:0009266 response to temper…	GO:0005622 intracellular; GO:0005623 cell; GO:0005634 nucleus; GO:0005737 cytoplasm; GO:0043226 organelle; GO:0043227 membrane-bounded organelle; GO:0043229 intracellular organelle; GO:0043231 intracellular membrane-bounded organelle;	GO:0003676 nucleic acid binding; GO:0003677 DNA binding; GO:0003690 double-stranded DNA binding; GO:0003697 single-stranded DNA binding; GO:0003723 RNA binding; GO:0003729 mRNA binding; GO:0005488 binding; GO:0097159 organic cyclic compound binding; GO:1901363 heterocyclic compound binding;	PF00313; PF00098	'Cold-shock' DNA-binding domain; Zinc knuckle	J	KOG3070	Predicted RNA-binding protein containing PIN domain and invovled in translation or RNA processing
A0A2G2Y1T4	UDP-glucose:glycoprotein glucosyltransferase OS=Capsicum annuum OX=4072 GN=T459_32399 PE=4 SV=1	T459_32399	1.308	0.000565743	Up	71.5	1.113	1.18	1.12	0.856	0.904	0.85	0.939	0.98	0.947	1.029	1.071	0.938	0.942	0.871	0.89	1.082	1.056	1.086	endoplasmic reticulum	K11718	HUGT; UDP-glucose:glycoprotein glucosyltransferase [EC:2.4.1.-]	map04141 Protein processing in endoplasmic reticulum	GO:0001101 response to acid chemical; GO:0002218 activation of innate immune response; GO:0002253 activation of immune response; GO:0002376 immune system process; GO:0002682 regulation of immune system process; GO:0002684 positive regulation of immune system process; GO:0006011 UDP-glucose metabolic process; GO:0006139 nucleobase-containing compound metabolic process; GO:0006457 protein folding; …	GO:0005622 intracellular; GO:0005623 cell; GO:0005737 cytoplasm; GO:0005783 endoplasmic reticulum; GO:0012505 endomembrane system; GO:0043226 organelle; GO:0043227 membrane-bounded organelle; GO:0043229 intracellular organelle; GO:0043231 intracellular membrane-bounded organelle;	GO:0003824 catalytic activity; GO:0003980 UDP-glucose:glycoprotein glucosyltransferase activity; GO:0005488 binding; GO:0005515 protein binding; GO:0008194 UDP-glycosyltransferase activity; GO:0016740 transferase activity; GO:0016757 transferase activity, transferring glycosyl groups; GO:0016758 transferase activity, transferring hexosyl groups; GO:0035251 UDP-glucosyltransferase activity; GO:004…	PF06427	UDP-glucose:Glycoprotein Glucosyltransferase	G	KOG1879	UDP-glucose:glycoprotein glucosyltransferase
A0A1U8H680	F-box domain-containing protein OS=Capsicum annuum OX=4072 GN=T459_15961 PE=4 SV=1	T459_15961	1.319	0.000467563	Up	43	1.19	1.128	1.097	0.865	0.879	0.846													nucleus							PF00646	F-box domain
A0A2G2Y5H7	LOB domain-containing protein 6 OS=Capsicum annuum OX=4072 GN=T459_29430 PE=4 SV=1	T459_29430	0.752	8.04683e-05	Down	16.2	0.872	0.851	0.855	1.155	1.108	1.166													mitochondria
A0A2G3A716	40S ribosomal protein S4 OS=Capsicum annuum OX=4072 GN=T459_05137 PE=3 SV=1	T459_05137	1.46	1.37095e-05	Up	34.9	1.182	1.224	1.166	0.812	0.82	0.815	0.995	0.98	0.993	1.035	1.045	0.968	0.981	1.003	0.979	0.933	1.064	0.987	cytoplasm	K02987	RP-S4e, RPS4; small subunit ribosomal protein S4e	map03010 Ribosome	GO:0006412 translation; GO:0006518 peptide metabolic process; GO:0006807 nitrogen compound metabolic process; GO:0008152 metabolic process; GO:0009058 biosynthetic process; GO:0009059 macromolecule biosynthetic process; GO:0009987 cellular process; GO:0010467 gene expression; GO:0019538 protein metabolic process; GO:0034641 cellular nitrogen compound metabolic process; GO:0034645 cellular macromo…	GO:0005622 intracellular; GO:0005623 cell; GO:0005634 nucleus; GO:0005730 nucleolus; GO:0005737 cytoplasm; GO:0005773 vacuole; GO:0005774 vacuolar membrane; GO:0005829 cytosol; GO:0005840 ribosome; GO:0005886 plasma membrane; GO:0009507 chloroplast; GO:0009536 plastid; GO:0015935 small ribosomal subunit; GO:0016020 membrane; GO:0022626 cytosolic ribosome; GO:0022627 cytosolic small ribosomal subu…	GO:0003676 nucleic acid binding; GO:0003723 RNA binding; GO:0003729 mRNA binding; GO:0003735 structural constituent of ribosome; GO:0005198 structural molecule activity; GO:0005488 binding; GO:0097159 organic cyclic compound binding; GO:1901363 heterocyclic compound binding;	PF08071; PF01479	RS4NT (NUC023) domain; S4 domain	J	KOG0378	40S ribosomal protein S4
A0A2G3A0S7	Serine protease inhibitor 1 OS=Capsicum annuum OX=4072 GN=T459_09951 PE=4 SV=1	T459_09951	0.738	0.00708322	Down	24.5	0.851	0.846	0.854	1.112	1.057	1.287	1.396	1.327	1.285	0.661	0.646	0.728	1.297	1.327	1.277	0.698	0.688	0.666	extracellular							PF00197	Trypsin and protease inhibitor
A0A2G2YY94	protein TSS(predicted) OS=Capsicum annuum OX=4072 GN=T459_21991 PE=4 SV=1	T459_21991	1.429	0.00503012	Up	207.5	1.3	1.15	1.083	0.877	0.815	0.781	1.038	1.065	1.027	1.042	0.896	0.941							nucleus	K03255	TIF31, CLU1; protein TIF31							S	KOG1839	Uncharacterized protein CLU1/cluA/TIF31 involved in mitochondrial morphology/distribution, also found associated with eIF-3
A0A1U8ENQ4	Leucine carboxyl methyltransferase 1 homolog OS=Capsicum annuum OX=4072 GN=T459_03253 PE=3 SV=1	T459_03253	1.302	0.0104644	Up	39.3	1.107	1.133	1.156	0.808	0.829	0.971	1.009	1.03	0.962	1.014	0.967	1.024	0.906	0.986	1.164	0.918	1.006	1.026	cytoplasm	K15451	PPM2, LCMT2, TYW4; tRNA wybutosine-synthesizing protein 4 [EC:2.1.1.290 2.3.1.231]		GO:0008152 metabolic process; GO:0009966 regulation of signal transduction; GO:0009968 negative regulation of signal transduction; GO:0010646 regulation of cell communication; GO:0010648 negative regulation of cell communication; GO:0023051 regulation of signaling; GO:0023057 negative regulation of signaling; GO:0032259 methylation; GO:0048519 negative regulation of biological process; GO:0048523…	GO:0005622 intracellular; GO:0005623 cell; GO:0005737 cytoplasm; GO:0005829 cytosol;	GO:0003824 catalytic activity; GO:0008168 methyltransferase activity; GO:0008757 S-adenosylmethionine-dependent methyltransferase activity; GO:0016740 transferase activity; GO:0016741 transferase activity, transferring one-carbon groups;			O	KOG2918	Carboxymethyl transferase
A0A1U8FW28	AB hydrolase-1 domain-containing protein OS=Capsicum annuum OX=4072 GN=T459_06340 PE=4 SV=1	T459_06340	0.751	0.00723217	Down	36.8	0.786	0.939	0.851	1.116	1.202	1.114													cytoplasm							PF00561	alpha/beta hydrolase fold	S	KOG1454	Predicted hydrolase/acyltransferase (alpha/beta hydrolase superfamily)
A0A2G2YU19	Polygalacturonase OS=Capsicum annuum OX=4072 GN=T459_24062 PE=3 SV=1	T459_24062	0.72	0.00182218	Down	36	0.87	0.874	0.77	1.14	1.149	1.205													nucleus	K01213	E3.2.1.67; galacturan 1,4-alpha-galacturonidase [EC:3.2.1.67]	map00040 Pentose and glucuronate interconversions; map01100 Metabolic pathways				PF00295	Glycosyl hydrolases family 28
A0A1U8FW14	Mitochondrial import receptor subunit TOM5-like protein OS=Capsicum annuum OX=4072 GN=T459_10436 PE=4 SV=1	T459_10436	0.718	0.000138115	Down	6.3	0.863	0.808	0.839	1.173	1.136	1.187	1.156	1.144	1.068	0.938	0.885	0.821	1.116	1.137	1.153	0.918	0.846	0.843	cytoplasm					GO:0005622 intracellular; GO:0005623 cell; GO:0005737 cytoplasm; GO:0005739 mitochondrion; GO:0009536 plastid; GO:0043226 organelle; GO:0043227 membrane-bounded organelle; GO:0043229 intracellular organelle; GO:0043231 intracellular membrane-bounded organelle;
A0A1U8H431	TPT domain-containing protein OS=Capsicum annuum OX=4072 GN=T459_16894 PE=4 SV=1	T459_16894	0.748	0.0013043	Down	38.3	0.881	0.813	0.877	1.196	1.097	1.142	0.945	0.854	0.722	1.183	1.107	1.192							plasma membrane	K15285	SLC35E3; solute carrier family 35, member E3		GO:0006810 transport; GO:0006811 ion transport; GO:0006820 anion transport; GO:0015711 organic anion transport; GO:0015780 nucleotide-sugar transmembrane transport; GO:0015783 GDP-fucose transmembrane transport; GO:0015786 UDP-glucose transmembrane transport; GO:0015931 nucleobase-containing compound transport; GO:0034220 ion transmembrane transport; GO:0051179 localization; GO:0051234 establishm…	GO:0005622 intracellular; GO:0005623 cell; GO:0005737 cytoplasm; GO:0005794 Golgi apparatus; GO:0012505 endomembrane system; GO:0043226 organelle; GO:0043227 membrane-bounded organelle; GO:0043229 intracellular organelle; GO:0043231 intracellular membrane-bounded organelle;	GO:0005215 transporter activity; GO:0005338 nucleotide-sugar transmembrane transporter activity; GO:0005457 GDP-fucose transmembrane transporter activity; GO:0005459 UDP-galactose transmembrane transporter activity; GO:0005460 UDP-glucose transmembrane transporter activity; GO:0008509 anion transmembrane transporter activity; GO:0008514 organic anion transmembrane transporter activity; GO:0015075…			EG	KOG1441	Glucose-6-phosphate/phosphate and phosphoenolpyruvate/phosphate antiporter
A0A2G3AMT6	Prolyl endopeptidase OS=Capsicum annuum OX=4072 GN=T459_03422 PE=4 SV=1	T459_03422	1.316	0.0374372	Up	82	1.262	0.962	1.188	0.823	0.914	0.855							0.886	1.024	0.864	1.054	1.079	1.099	cytoplasm	K01322	PREP; prolyl oligopeptidase [EC:3.4.21.26]		GO:0006508 proteolysis; GO:0006807 nitrogen compound metabolic process; GO:0008152 metabolic process; GO:0019538 protein metabolic process; GO:0043170 macromolecule metabolic process; GO:0044238 primary metabolic process; GO:0071704 organic substance metabolic process; GO:1901564 organonitrogen compound metabolic process;	GO:0005622 intracellular; GO:0005623 cell; GO:0005634 nucleus; GO:0005737 cytoplasm; GO:0005829 cytosol; GO:0043226 organelle; GO:0043227 membrane-bounded organelle; GO:0043229 intracellular organelle; GO:0043231 intracellular membrane-bounded organelle;	GO:0003824 catalytic activity; GO:0004175 endopeptidase activity; GO:0005488 binding; GO:0008233 peptidase activity; GO:0016787 hydrolase activity; GO:0033218 amide binding; GO:0042277 peptide binding; GO:0070011 peptidase activity, acting on L-amino acid peptides; GO:0140096 catalytic activity, acting on a protein;	PF02897; PF00326	Prolyl oligopeptidase, N-terminal beta-propeller domain; Prolyl oligopeptidase family	O	KOG2237	Predicted serine protease
A0A2G2YJP2	TF-B3 domain-containing protein(predicted) OS=Capsicum annuum OX=4072 GN=T459_24915 PE=4 SV=1	T459_24915	0.685	7.31834e-06	Down	51	0.828	0.807	0.807	1.21	1.181	1.174													plasma membrane
A0A1U8EYM1	Tyrosine aminotransferase OS=Capsicum annuum OX=4072 GN=T459_31139 PE=3 SV=1	T459_31139	1.353	0.00811943	Up	47.1	1.054	1.254	1.144	0.796	0.856	0.9													cytoplasm	K00815	TAT; tyrosine aminotransferase [EC:2.6.1.5]	map00130 Ubiquinone and other terpenoid-quinone biosynthesis; map00270 Cysteine and methionine metabolism; map00350 Tyrosine metabolism; map00360 Phenylalanine metabolism; map00400 Phenylalanine, tyrosine and tryptophan biosynthesis; map00950 Isoquinoline alkaloid biosynthesis; map00960 Tropane, piperidine and pyridine alkaloid biosynthesis; map01100 Metabolic pathways; map01110 Biosynthesis of s…	GO:0006082 organic acid metabolic process; GO:0006520 cellular amino acid metabolic process; GO:0006570 tyrosine metabolic process; GO:0006572 tyrosine catabolic process; GO:0006725 cellular aromatic compound metabolic process; GO:0006766 vitamin metabolic process; GO:0006775 fat-soluble vitamin metabolic process; GO:0006807 nitrogen compound metabolic process; GO:0008152 metabolic process; GO:00…	GO:0005622 intracellular; GO:0005623 cell; GO:0005737 cytoplasm; GO:0005829 cytosol;	GO:0003824 catalytic activity; GO:0004838 L-tyrosine:2-oxoglutarate aminotransferase activity; GO:0008483 transaminase activity; GO:0016740 transferase activity; GO:0016769 transferase activity, transferring nitrogenous groups; GO:0070547 L-tyrosine aminotransferase activity;	PF00155	Aminotransferase class I and II	E	KOG0259	Tyrosine aminotransferase
A0A2G3AC89	Beta-galactosidase OS=Capsicum annuum OX=4072 GN=T459_06948 PE=3 SV=1	T459_06948	0.707	0.0022993	Down	91.3	0.899	0.801	0.787	1.11	1.22	1.19	1.065	1.032	1.04	0.963	0.958	0.941	1.256	1.197	1.209	0.775	0.753	0.806	chloroplast					GO:0005618 cell wall; GO:0005622 intracellular; GO:0005623 cell; GO:0005737 cytoplasm; GO:0005773 vacuole; GO:0030312 external encapsulating structure; GO:0043226 organelle; GO:0043227 membrane-bounded organelle; GO:0043229 intracellular organelle; GO:0043231 intracellular membrane-bounded organelle; GO:0071944 cell periphery;	GO:0003824 catalytic activity; GO:0004553 hydrolase activity, hydrolyzing O-glycosyl compounds; GO:0004565 beta-galactosidase activity; GO:0015925 galactosidase activity; GO:0016787 hydrolase activity; GO:0016798 hydrolase activity, acting on glycosyl bonds;	PF01301; PF02140	Glycosyl hydrolases family 35; Galactose binding lectin domain	G	KOG0496	Beta-galactosidase
A0A2G3AJW2	Tetraketide alpha-pyrone reductase 2 OS=Capsicum annuum OX=4072 GN=T459_02423 PE=4 SV=1	T459_02423	0.592	9.31536e-05	Down	34.7	0.778	0.746	0.696	1.251	1.265	1.235	1.031	0.984	1.004	1.012	0.943	1.006							chloroplast				GO:0006725 cellular aromatic compound metabolic process; GO:0007275 multicellular organism development; GO:0008152 metabolic process; GO:0009058 biosynthetic process; GO:0009555 pollen development; GO:0009653 anatomical structure morphogenesis; GO:0009987 cellular process; GO:0010208 pollen wall assembly; GO:0010584 pollen exine formation; GO:0010927 cellular component assembly involved in morpho…	GO:0005622 intracellular; GO:0005623 cell; GO:0005737 cytoplasm; GO:0005829 cytosol;				V	KOG1502	Flavonol reductase/cinnamoyl-CoA reductase
A0A1U8EPG9	NADH-ubiquinone oxidoreductase(predicted) OS=Capsicum annuum OX=4072 GN=T459_27633 PE=4 SV=1	T459_27633	0.761	0.00294981	Down	10.9	0.83	0.889	0.876	1.221	1.084	1.107	0.978	1.031	1.066	0.994	0.98	0.956	0.96	1.174	1.058	0.954	0.926	0.94	nucleus					GO:0005622 intracellular; GO:0005623 cell; GO:0005737 cytoplasm; GO:0005739 mitochondrion; GO:0005740 mitochondrial envelope; GO:0005743 mitochondrial inner membrane; GO:0016020 membrane; GO:0019866 organelle inner membrane; GO:0031090 organelle membrane; GO:0031966 mitochondrial membrane; GO:0031967 organelle envelope; GO:0031975 envelope; GO:0043226 organelle; GO:0043227 membrane-bounded organe…
A0A1U8EPD5	MLP-like protein OS=Capsicum annuum OX=4072 GN=T459_27606 PE=4 SV=1	T459_27606	0.555	2.26587e-06	Down	17	0.697	0.722	0.709	1.28	1.253	1.299	0.882	0.911	0.891	1.114	1.104	1.088	1.12	1.092	1.064	0.907	0.896	0.891	chloroplast					GO:0016020 membrane;		PF00407	Pathogenesis-related protein Bet v I family
A0A1U8FI50	leucine--tRNA ligase, cytoplasmic-like(predicted) OS=Capsicum annuum OX=4072 GN=T459_04622 PE=3 SV=1	T459_04622	1.33	0.000497163	Up	122.6	1.105	1.177	1.144	0.825	0.866	0.885	0.987	0.966	0.967	1.011	0.989	1.09	0.857	0.919	0.896	1.102	1.112	1.11	cytoplasm	K01869	LARS, leuS; leucyl-tRNA synthetase [EC:6.1.1.4]	map00970 Aminoacyl-tRNA biosynthesis	GO:0001101 response to acid chemical; GO:0006082 organic acid metabolic process; GO:0006139 nucleobase-containing compound metabolic process; GO:0006399 tRNA metabolic process; GO:0006412 translation; GO:0006418 tRNA aminoacylation for protein translation; GO:0006425 glutaminyl-tRNA aminoacylation; GO:0006429 leucyl-tRNA aminoacylation; GO:0006438 valyl-tRNA aminoacylation; GO:0006518 peptide met…	GO:0000323 lytic vacuole; GO:0005622 intracellular; GO:0005623 cell; GO:0005634 nucleus; GO:0005654 nucleoplasm; GO:0005737 cytoplasm; GO:0005764 lysosome; GO:0005773 vacuole; GO:0005783 endoplasmic reticulum; GO:0005829 cytosol; GO:0005911 cell-cell junction; GO:0009506 plasmodesma; GO:0009507 chloroplast; GO:0009536 plastid; GO:0012505 endomembrane system; GO:0016604 nuclear body; GO:0017101 am…	GO:0003824 catalytic activity; GO:0004812 aminoacyl-tRNA ligase activity; GO:0004819 glutamine-tRNA ligase activity; GO:0004823 leucine-tRNA ligase activity; GO:0004832 valine-tRNA ligase activity; GO:0005096 GTPase activator activity; GO:0008047 enzyme activator activity; GO:0016874 ligase activity; GO:0016875 ligase activity, forming carbon-oxygen bonds; GO:0030234 enzyme regulator activity; GO…	PF08264	Anticodon-binding domain of tRNA	J	KOG0437	Leucyl-tRNA synthetase
A0A2G2Z450	myb-like protein X(predicted) OS=Capsicum annuum OX=4072 GN=T459_20246 PE=4 SV=1	T459_20246	0.757	3.32989e-05	Down	99.9	0.873	0.86	0.836	1.132	1.122	1.141	0.968	0.91	0.878	1.032	1.072	1.089	1.01	0.972	1.012	0.976	0.994	1.02	nucleus
A0A2G3A5F5	CBS domain-containing protein CBSX1, chloroplastic OS=Capsicum annuum OX=4072 GN=T459_04588 PE=4 SV=1	T459_04588	1.304	0.00101241	Up	26	1.192	1.123	1.084	0.848	0.869	0.889	1.018	1.04	1.067	0.899	0.952	1.031							chloroplast				GO:0009987 cellular process; GO:0019725 cellular homeostasis; GO:0042592 homeostatic process; GO:0045454 cell redox homeostasis; GO:0050789 regulation of biological process; GO:0050794 regulation of cellular process; GO:0065007 biological regulation; GO:0065008 regulation of biological quality;	GO:0005622 intracellular; GO:0005623 cell; GO:0005737 cytoplasm; GO:0009507 chloroplast; GO:0009536 plastid; GO:0043226 organelle; GO:0043227 membrane-bounded organelle; GO:0043229 intracellular organelle; GO:0043231 intracellular membrane-bounded organelle;		PF00571	CBS domain
A0A2G2Y8J8	AAA domain-containing protein(predicted) OS=Capsicum annuum OX=4072 GN=T459_30520 PE=4 SV=1	T459_30520	1.36	0.000278341	Up	39.6	1.121	1.129	1.209	0.837	0.862	0.845													cytoskeleton				GO:0006508 proteolysis; GO:0006807 nitrogen compound metabolic process; GO:0008152 metabolic process; GO:0019538 protein metabolic process; GO:0043170 macromolecule metabolic process; GO:0044238 primary metabolic process; GO:0071704 organic substance metabolic process; GO:1901564 organonitrogen compound metabolic process;	GO:0005622 intracellular; GO:0005623 cell; GO:0005737 cytoplasm; GO:0005739 mitochondrion; GO:0009507 chloroplast; GO:0009526 plastid envelope; GO:0009536 plastid; GO:0009941 chloroplast envelope; GO:0031967 organelle envelope; GO:0031975 envelope; GO:0043226 organelle; GO:0043227 membrane-bounded organelle; GO:0043229 intracellular organelle; GO:0043231 intracellular membrane-bounded organelle;	GO:0003824 catalytic activity; GO:0004176 ATP-dependent peptidase activity; GO:0008233 peptidase activity; GO:0008237 metallopeptidase activity; GO:0016462 pyrophosphatase activity; GO:0016787 hydrolase activity; GO:0016817 hydrolase activity, acting on acid anhydrides; GO:0016818 hydrolase activity, acting on acid anhydrides, in phosphorus-containing anhydrides; GO:0016887 ATPase activity; GO:00…			O	KOG0731	AAA+-type ATPase containing the peptidase M41 domain
A0A1U8GXB5	Calcium-dependent protein kinase 7 OS=Capsicum annuum OX=4072 GN=T459_25889 PE=4 SV=1	T459_25889	1.405	0.0128148	Up	60	1.172	1.1	1.236	0.841	0.724	0.931													chloroplast	K13412	CPK; calcium-dependent protein kinase [EC:2.7.11.1]	map04626 Plant-pathogen interaction	GO:0001101 response to acid chemical; GO:0006464 cellular protein modification process; GO:0006468 protein phosphorylation; GO:0006793 phosphorus metabolic process; GO:0006796 phosphate-containing compound metabolic process; GO:0006807 nitrogen compound metabolic process; GO:0007154 cell communication; GO:0007165 signal transduction; GO:0008152 metabolic process; GO:0009719 response to endogenous…	GO:0005622 intracellular; GO:0005623 cell; GO:0005634 nucleus; GO:0005737 cytoplasm; GO:0005886 plasma membrane; GO:0016020 membrane; GO:0043226 organelle; GO:0043227 membrane-bounded organelle; GO:0043229 intracellular organelle; GO:0043231 intracellular membrane-bounded organelle; GO:0071944 cell periphery;	GO:0003824 catalytic activity; GO:0004672 protein kinase activity; GO:0004674 protein serine/threonine kinase activity; GO:0004683 calmodulin-dependent protein kinase activity; GO:0005488 binding; GO:0005515 protein binding; GO:0005516 calmodulin binding; GO:0009931 calcium-dependent protein serine/threonine kinase activity; GO:0010857 calcium-dependent protein kinase activity; GO:0016301 kinase …	PF00069; PF13499	Protein kinase domain; EF-hand domain pair	T	KOG0032	Ca2+/calmodulin-dependent protein kinase, EF-Hand protein superfamily
A0A1U8HFN5	Defensin-like protein OS=Capsicum annuum OX=4072 GN=T459_18762 PE=3 SV=1	T459_18762	0.303	1.79722e-06	Down	11.9	0.479	0.463	0.456	1.61	1.487	1.517													extracellular							PF00304	Gamma-thionin family
A0A2G2ZV48	Transmembrane emp24 domain-containing protein p24beta3 OS=Capsicum annuum OX=4072 GN=T459_07953 PE=3 SV=1	T459_07953	1.348	0.000102963	Up	24.9	1.139	1.168	1.14	0.847	0.881	0.83	1.005	1.017	1.044	0.991	0.978	0.972	0.98	0.938	0.993	0.996	1.062	1.038	cytoplasm	K20347	TMED2, EMP24; p24 family protein beta-1			GO:0005622 intracellular; GO:0005623 cell; GO:0005737 cytoplasm; GO:0005773 vacuole; GO:0005783 endoplasmic reticulum; GO:0005794 Golgi apparatus; GO:0012505 endomembrane system; GO:0043226 organelle; GO:0043227 membrane-bounded organelle; GO:0043229 intracellular organelle; GO:0043231 intracellular membrane-bounded organelle;		PF01105	emp24/gp25L/p24 family/GOLD	U	KOG1692	Putative cargo transport protein EMP24 (p24 protein family)
A0A2G3AE51	Protein HOTHEAD OS=Capsicum annuum OX=4072 GN=T459_00393 PE=4 SV=1	T459_00393	0.613	3.80162e-05	Down	45.2	0.753	0.79	0.736	1.217	1.271	1.229	1.002	1.047	1.036	0.931	1.026	0.953	1.096	1.128	1.066	0.943	0.844	0.922	cytoplasm	K00108	betA, CHDH; choline dehydrogenase [EC:1.1.99.1]	map00260 Glycine, serine and threonine metabolism; map01100 Metabolic pathways	GO:0006082 organic acid metabolic process; GO:0006629 lipid metabolic process; GO:0006631 fatty acid metabolic process; GO:0007154 cell communication; GO:0007267 cell-cell signaling; GO:0007275 multicellular organism development; GO:0008152 metabolic process; GO:0009553 embryo sac development; GO:0009987 cellular process; GO:0010430 fatty acid omega-oxidation; GO:0019395 fatty acid oxidation; GO:…	GO:0005576 extracellular region;	GO:0000166 nucleotide binding; GO:0003824 catalytic activity; GO:0005488 binding; GO:0016829 lyase activity; GO:0016830 carbon-carbon lyase activity; GO:0016832 aldehyde-lyase activity; GO:0036094 small molecule binding; GO:0043167 ion binding; GO:0043168 anion binding; GO:0046593 mandelonitrile lyase activity; GO:0048037 cofactor binding; GO:0050660 flavin adenine dinucleotide binding; GO:005066…	PF00732; PF05199	GMC oxidoreductase; GMC oxidoreductase	E	KOG1238	Glucose dehydrogenase/choline dehydrogenase/mandelonitrile lyase (GMC oxidoreductase family)
A0A2G2Y8H5	Coatomer subunit beta'-1 (Fragment) OS=Capsicum annuum OX=4072 GN=T459_30465 PE=4 SV=1	T459_30465	1.331	1.92325e-05	Up	103.4	1.158	1.165	1.124	0.855	0.866	0.869	0.917	0.929	0.914	1.101	1.064	1.093	0.759	0.742	0.772	1.272	1.215	1.233	cytoplasm	K17302	COPB2, SEC27; coatomer subunit beta'		GO:0006810 transport; GO:0006886 intracellular protein transport; GO:0006888 endoplasmic reticulum to Golgi vesicle-mediated transport; GO:0006890 retrograde vesicle-mediated transport, Golgi to endoplasmic reticulum; GO:0006891 intra-Golgi vesicle-mediated transport; GO:0008104 protein localization; GO:0015031 protein transport; GO:0015833 peptide transport; GO:0016192 vesicle-mediated transport…	GO:0005622 intracellular; GO:0005623 cell; GO:0005737 cytoplasm; GO:0005794 Golgi apparatus; GO:0005798 Golgi-associated vesicle; GO:0005829 cytosol; GO:0012505 endomembrane system; GO:0012506 vesicle membrane; GO:0016020 membrane; GO:0030117 membrane coat; GO:0030120 vesicle coat; GO:0030126 COPI vesicle coat; GO:0030135 coated vesicle; GO:0030137 COPI-coated vesicle; GO:0030659 cytoplasmic vesi…				U	KOG0276	Vesicle coat complex COPI, beta' subunit
A0A1U8GL40	Abscisic stress-ripening protein 2 OS=Capsicum annuum OX=4072 GN=T459_12440 PE=4 SV=1	T459_12440	0.763	0.00210853	Down	30.5	0.869	0.898	0.825	1.183	1.144	1.071	1.039	1.052	0.972	1.005	0.978	0.94	1.013	1.047	0.968	1.023	1.001	0.974	nucleus
A0A2G2YLM2	Vacuolar-sorting receptor 1 OS=Capsicum annuum OX=4072 GN=T459_25595 PE=4 SV=1	T459_25595	1.338	0.000132044	Up	69.5	1.152	1.201	1.125	0.869	0.874	0.856	1.05	1.007	1	0.978	0.961	0.978	0.99	1.011	0.995	1.042	0.946	0.998	plasma membrane				GO:0006605 protein targeting; GO:0006623 protein targeting to vacuole; GO:0006810 transport; GO:0006886 intracellular protein transport; GO:0006892 post-Golgi vesicle-mediated transport; GO:0006896 Golgi to vacuole transport; GO:0007034 vacuolar transport; GO:0008104 protein localization; GO:0015031 protein transport; GO:0015833 peptide transport; GO:0016192 vesicle-mediated transport; GO:0033036…	GO:0000139 Golgi membrane; GO:0005622 intracellular; GO:0005623 cell; GO:0005737 cytoplasm; GO:0005768 endosome; GO:0005770 late endosome; GO:0005783 endoplasmic reticulum; GO:0005794 Golgi apparatus; GO:0005802 trans-Golgi network; GO:0005886 plasma membrane; GO:0010008 endosome membrane; GO:0012505 endomembrane system; GO:0012506 vesicle membrane; GO:0016020 membrane; GO:0030135 coated vesicle;…	GO:0005048 signal sequence binding; GO:0005488 binding; GO:0009940 amino-terminal vacuolar sorting propeptide binding; GO:0010209 vacuolar sorting signal binding; GO:0033218 amide binding; GO:0042277 peptide binding;
A0A1U8E748	Short-chain dehydrogenase TIC 32, chloroplastic OS=Capsicum annuum OX=4072 GN=T459_25684 PE=3 SV=1	T459_25684	0.689	0.00010515	Down	35.5	0.821	0.823	0.815	1.213	1.134	1.224	1.082	1.112	1.108	0.884	0.908	0.91	0.925	1.133	0.984	1.017	0.978	0.972	mitochondria	K11153	RDH12; retinol dehydrogenase 12 [EC:1.1.1.300]	map01100 Metabolic pathways				PF00106	short chain dehydrogenase	Q	KOG1208	Dehydrogenases with different specificities (related to short-chain alcohol dehydrogenases)
A0A2G3A3S9	26S protease regulatory subunit 7 OS=Capsicum annuum OX=4072 GN=T459_10991 PE=3 SV=1	T459_10991	0.759	6.457e-06	Down	46.8	0.85	0.87	0.872	1.142	1.142	1.13	0.797	0.847	0.772	1.284	1.148	1.154							cytoplasm	K03061	PSMC2, RPT1; 26S proteasome regulatory subunit T1	map03050 Proteasome	GO:0006355 regulation of transcription, DNA-templated; GO:0006357 regulation of transcription by RNA polymerase II; GO:0006508 proteolysis; GO:0006511 ubiquitin-dependent protein catabolic process; GO:0006807 nitrogen compound metabolic process; GO:0006950 response to stress; GO:0008152 metabolic process; GO:0009056 catabolic process; GO:0009057 macromolecule catabolic process; GO:0009889 regulat…	GO:0000502 proteasome complex; GO:0005622 intracellular; GO:0005623 cell; GO:0005634 nucleus; GO:0005737 cytoplasm; GO:0005829 cytosol; GO:0005886 plasma membrane; GO:0016020 membrane; GO:0031595 nuclear proteasome complex; GO:0031597 cytosolic proteasome complex; GO:0031974 membrane-enclosed lumen; GO:0031981 nuclear lumen; GO:0032991 protein-containing complex; GO:0043226 organelle; GO:0043227 …	GO:0003824 catalytic activity; GO:0005488 binding; GO:0005515 protein binding; GO:0008134 transcription factor binding; GO:0016462 pyrophosphatase activity; GO:0016787 hydrolase activity; GO:0016817 hydrolase activity, acting on acid anhydrides; GO:0016818 hydrolase activity, acting on acid anhydrides, in phosphorus-containing anhydrides; GO:0016887 ATPase activity; GO:0017025 TBP-class protein b…	PF00004	ATPase family associated with various cellular activities (AAA)	O	KOG0729	26S proteasome regulatory complex, ATPase RPT1
A0A2G3AMN0	trafficking protein particle complex subunit 8(predicted) OS=Capsicum annuum OX=4072 GN=T459_03362 PE=4 SV=1	T459_03362	1.365	0.0015732	Up	142.8	1.158	1.23	1.079	0.846	0.825	0.868	0.926	0.892	0.8	1.269	1.074	1.044	0.781	0.796	0.833	1.234	1.077	1.227	nucleus	K20305	TRAPPC8, TRS85; trafficking protein particle complex subunit 8							D	KOG1938	Protein with predicted involvement in meiosis (GSG1)
A0A1U8H419	Putative maternal effect embryo arrest 59-like(predicted) OS=Capsicum annuum OX=4072 GN=T459_16209 PE=4 SV=1	T459_16209	0.757	0.000740622	Down	19.2	0.825	0.904	0.856	1.164	1.139	1.11	1.025	0.971	0.984	1.015	0.982	1.023	1.269	1.284	1.221	0.745	0.761	0.738	cytoplasm
A0A2G2YHG9	Putative inactive purple acid phosphatase 14 OS=Capsicum annuum OX=4072 GN=T459_28689 PE=4 SV=1	T459_28689	0.754	0.000921941	Down	42.3	0.86	0.907	0.842	1.176	1.101	1.185	0.935	0.942	0.963	1.052	1.055	1.058	1.023	1.05	0.972	0.984	0.962	1.016	nucleus				GO:0006793 phosphorus metabolic process; GO:0006796 phosphate-containing compound metabolic process; GO:0008152 metabolic process; GO:0009987 cellular process; GO:0016311 dephosphorylation; GO:0044237 cellular metabolic process;		GO:0003824 catalytic activity; GO:0003993 acid phosphatase activity; GO:0016787 hydrolase activity; GO:0016788 hydrolase activity, acting on ester bonds; GO:0016791 phosphatase activity; GO:0042578 phosphoric ester hydrolase activity;	PF00149	Calcineurin-like phosphoesterase	S	KOG1432	Predicted DNA repair exonuclease SIA1
A0A1U8E2Z9	Protein ABIL1 OS=Capsicum annuum OX=4072 GN=T459_21867 PE=4 SV=1	T459_21867	0.762	0.00106895	Down	34.4	0.88	0.894	0.823	1.128	1.179	1.102	0.996	1.039	0.906	1.046	1.089	0.932							nucleus									TZ	KOG2546	Abl interactor ABI-1, contains SH3 domain
A0A2G2ZSZ3	Tetratricopeptide repeat protein SKI3 (Fragment) OS=Capsicum annuum OX=4072 GN=T459_13537 PE=4 SV=1	T459_13537	1.335	0.000302846	Up	131.6	1.116	1.13	1.188	0.882	0.854	0.836	0.803	0.791	0.946	1.224	1.169	1.068	0.843	0.832	0.77	1.154	1.24	1.221	nucleus	K12600	SKI3, TTC37; superkiller protein 3	map03018 RNA degradation	GO:0000184 nuclear-transcribed mRNA catabolic process, nonsense-mediated decay; GO:0000288 nuclear-transcribed mRNA catabolic process, deadenylation-dependent decay; GO:0000291 nuclear-transcribed mRNA catabolic process, exonucleolytic; GO:0000956 nuclear-transcribed mRNA catabolic process; GO:0006139 nucleobase-containing compound metabolic process; GO:0006401 RNA catabolic process; GO:0006402 m…	GO:0000785 chromatin; GO:0005622 intracellular; GO:0005623 cell; GO:0005634 nucleus; GO:0005694 chromosome; GO:0005737 cytoplasm; GO:0032991 protein-containing complex; GO:0035327 transcriptionally active chromatin; GO:0043226 organelle; GO:0043227 membrane-bounded organelle; GO:0043228 non-membrane-bounded organelle; GO:0043229 intracellular organelle; GO:0043231 intracellular membrane-bounded o…				A	KOG1127	TPR repeat-containing protein
A0A2G2YR93	Tropinone reductase 2 OS=Capsicum annuum OX=4072 GN=T459_23048 PE=4 SV=1	T459_23048	0.763	0.000940324	Down	29.5	0.826	0.904	0.859	1.16	1.138	1.096	0.844	0.901	0.869	1.117	1.13	1.122	1.042	1.014	0.954	1.04	0.982	1.008	nucleus	K08081	TR1; tropinone reductase I [EC:1.1.1.206]	map00960 Tropane, piperidine and pyridine alkaloid biosynthesis; map01100 Metabolic pathways; map01110 Biosynthesis of secondary metabolites				PF13561	Enoyl-(Acyl carrier protein) reductase	Q	KOG0725	Reductases with broad range of substrate specificities
A0A1U8FCJ6	DNA damage-binding protein 1 OS=Capsicum annuum OX=4072 GN=T459_07962 PE=4 SV=1	T459_07962	1.354	4.52304e-06	Up	121.5	1.159	1.144	1.125	0.84	0.846	0.846	0.947	0.932	0.961	1.067	1.038	1.044	0.9	0.806	0.925	1.125	1.129	1.163	cytoplasm	K10610	DDB1; DNA damage-binding protein 1	map03420 Nucleotide excision repair; map04120 Ubiquitin mediated proteolysis	GO:0000003 reproduction; GO:0003006 developmental process involved in reproduction; GO:0006139 nucleobase-containing compound metabolic process; GO:0006259 DNA metabolic process; GO:0006281 DNA repair; GO:0006289 nucleotide-excision repair; GO:0006508 proteolysis; GO:0006511 ubiquitin-dependent protein catabolic process; GO:0006725 cellular aromatic compound metabolic process; GO:0006807 nitrogen…	GO:0000151 ubiquitin ligase complex; GO:0005622 intracellular; GO:0005623 cell; GO:0005634 nucleus; GO:0005737 cytoplasm; GO:0005829 cytosol; GO:0031461 cullin-RING ubiquitin ligase complex; GO:0032991 protein-containing complex; GO:0043226 organelle; GO:0043227 membrane-bounded organelle; GO:0043229 intracellular organelle; GO:0043231 intracellular membrane-bounded organelle; GO:0080008 Cul4-RIN…	GO:0003676 nucleic acid binding; GO:0003677 DNA binding; GO:0003684 damaged DNA binding; GO:0005488 binding; GO:0097159 organic cyclic compound binding; GO:1901363 heterocyclic compound binding;	PF10433	Mono-functional DNA-alkylating methyl methanesulfonate N-term	L	KOG1897	Damage-specific DNA binding complex, subunit DDB1
A0A2G2YTX4	ATP-dependent DNA helicase OS=Capsicum annuum OX=4072 GN=T459_23995 PE=3 SV=1	T459_23995	1.455	0.000426449	Up	103.1	1.233	1.13	1.196	0.811	0.851	0.784	0.82	1.191	1.136	0.705	1.119	1.033							nucleus	K03654	recQ; ATP-dependent DNA helicase RecQ [EC:3.6.4.12]	map03018 RNA degradation	GO:0000018 regulation of DNA recombination; GO:0000723 telomere maintenance; GO:0000724 double-strand break repair via homologous recombination; GO:0000725 recombinational repair; GO:0000731 DNA synthesis involved in DNA repair; GO:0001302 replicative cell aging; GO:0006139 nucleobase-containing compound metabolic process; GO:0006259 DNA metabolic process; GO:0006260 DNA replication; GO:0006261 D…	GO:0000781 chromosome, telomeric region; GO:0005622 intracellular; GO:0005623 cell; GO:0005634 nucleus; GO:0005654 nucleoplasm; GO:0005657 replication fork; GO:0005694 chromosome; GO:0005730 nucleolus; GO:0005737 cytoplasm; GO:0005813 centrosome; GO:0005815 microtubule organizing center; GO:0005856 cytoskeleton; GO:0015630 microtubule cytoskeleton; GO:0016604 nuclear body; GO:0016607 nuclear spec…	GO:0000217 DNA secondary structure binding; GO:0000287 magnesium ion binding; GO:0000400 four-way junction DNA binding; GO:0000403 Y-form DNA binding; GO:0000405 bubble DNA binding; GO:0003676 nucleic acid binding; GO:0003677 DNA binding; GO:0003678 DNA helicase activity; GO:0003682 chromatin binding; GO:0003684 damaged DNA binding; GO:0003824 catalytic activity; GO:0004386 helicase activity; GO:…	PF00270; PF09382; PF00570	DEAD/DEAH box helicase; RQC domain; HRDC domain	L	KOG0351	ATP-dependent DNA helicase
A0A1U8ESQ6	Cysteine proteinase RD21a OS=Capsicum annuum OX=4072 GN=T459_30828 PE=3 SV=1	T459_30828	0.765	2.16446e-05	Down	51	0.868	0.866	0.863	1.144	1.105	1.144	0.794	0.756	0.832	1.178	1.182	1.207	0.949	0.89	0.897	1.093	1.11	1.129	extracellular				GO:0006508 proteolysis; GO:0006807 nitrogen compound metabolic process; GO:0007275 multicellular organism development; GO:0008152 metabolic process; GO:0009056 catabolic process; GO:0009057 macromolecule catabolic process; GO:0009555 pollen development; GO:0009987 cellular process; GO:0019538 protein metabolic process; GO:0030163 protein catabolic process; GO:0032501 multicellular organismal proc…	GO:0000323 lytic vacuole; GO:0005576 extracellular region; GO:0005615 extracellular space; GO:0005622 intracellular; GO:0005623 cell; GO:0005737 cytoplasm; GO:0005764 lysosome; GO:0005773 vacuole; GO:0043226 organelle; GO:0043227 membrane-bounded organelle; GO:0043229 intracellular organelle; GO:0043231 intracellular membrane-bounded organelle;	GO:0003824 catalytic activity; GO:0004175 endopeptidase activity; GO:0004197 cysteine-type endopeptidase activity; GO:0008233 peptidase activity; GO:0008234 cysteine-type peptidase activity; GO:0016787 hydrolase activity; GO:0070011 peptidase activity, acting on L-amino acid peptides; GO:0140096 catalytic activity, acting on a protein;	PF08246; PF00112	Cathepsin propeptide inhibitor domain (I29); Papain family cysteine protease	O	KOG4296	Epithelin/granulin
A0A2G2Z764	40S ribosomal protein S4 OS=Capsicum annuum OX=4072 GN=T459_15898 PE=3 SV=1	T459_15898	1.43	0.000146908	Up	31.1	1.196	1.2	1.143	0.802	0.857	0.815	1.073	1.035	1.017	0.958	0.987	0.956	1.058	1.067	1.037	0.967	0.943	0.944	cytoplasm	K02987	RP-S4e, RPS4; small subunit ribosomal protein S4e	map03010 Ribosome	GO:0006412 translation; GO:0006518 peptide metabolic process; GO:0006807 nitrogen compound metabolic process; GO:0008152 metabolic process; GO:0009058 biosynthetic process; GO:0009059 macromolecule biosynthetic process; GO:0009987 cellular process; GO:0010467 gene expression; GO:0019538 protein metabolic process; GO:0034641 cellular nitrogen compound metabolic process; GO:0034645 cellular macromo…	GO:0005622 intracellular; GO:0005623 cell; GO:0005634 nucleus; GO:0005730 nucleolus; GO:0005737 cytoplasm; GO:0005773 vacuole; GO:0005774 vacuolar membrane; GO:0005829 cytosol; GO:0005840 ribosome; GO:0005886 plasma membrane; GO:0009507 chloroplast; GO:0009536 plastid; GO:0015935 small ribosomal subunit; GO:0016020 membrane; GO:0022626 cytosolic ribosome; GO:0022627 cytosolic small ribosomal subu…	GO:0003676 nucleic acid binding; GO:0003723 RNA binding; GO:0003729 mRNA binding; GO:0003735 structural constituent of ribosome; GO:0005198 structural molecule activity; GO:0005488 binding; GO:0097159 organic cyclic compound binding; GO:1901363 heterocyclic compound binding;	PF08071; PF01479	RS4NT (NUC023) domain; S4 domain	J	KOG0378	40S ribosomal protein S4
A0A2G2Z893	Serine/threonine-protein phosphatase OS=Capsicum annuum OX=4072 GN=T459_16173 PE=3 SV=1	T459_16173	0.628	0.0414872	Down	36.5	0.664	0.762	0.891	0.937	1.344	1.406	0.909	0.824	0.884	1.1	1.075	1.209	0.926	0.933	0.979	1.085	1.091	1.072	cytoplasm	K06269	PPP1C; serine/threonine-protein phosphatase PP1 catalytic subunit [EC:3.1.3.16]	map03015 mRNA surveillance pathway	GO:0006464 cellular protein modification process; GO:0006470 protein dephosphorylation; GO:0006793 phosphorus metabolic process; GO:0006796 phosphate-containing compound metabolic process; GO:0006807 nitrogen compound metabolic process; GO:0008152 metabolic process; GO:0009987 cellular process; GO:0016311 dephosphorylation; GO:0019538 protein metabolic process; GO:0036211 protein modification pro…	GO:0000164 protein phosphatase type 1 complex; GO:0005622 intracellular; GO:0005623 cell; GO:0005737 cytoplasm; GO:0008287 protein serine/threonine phosphatase complex; GO:0032991 protein-containing complex; GO:1902494 catalytic complex; GO:1903293 phosphatase complex;	GO:0003824 catalytic activity; GO:0004721 phosphoprotein phosphatase activity; GO:0004722 protein serine/threonine phosphatase activity; GO:0016787 hydrolase activity; GO:0016788 hydrolase activity, acting on ester bonds; GO:0016791 phosphatase activity; GO:0042578 phosphoric ester hydrolase activity; GO:0140096 catalytic activity, acting on a protein;	PF00149	Calcineurin-like phosphoesterase	T	KOG0374	Serine/threonine specific protein phosphatase PP1, catalytic subunit
A0A2G2Y1S5	RRM domain-containing protein OS=Capsicum annuum OX=4072 GN=T459_32510 PE=4 SV=1	T459_32510	1.388	0.0017728	Up	95.7	1.116	1.268	1.107	0.838	0.836	0.841	0.959	0.962	0.929	1.026	1.057	1.073	1.062	1.074	1.119	0.936	0.899	0.921	nucleus	K22611	SART3, TIP110; squamous cell carcinoma antigen recognized by T-cells 3					PF00076	RNA recognition motif. (a.k.a. RRM, RBD, or RNP domain)	A	KOG0128	RNA-binding protein SART3 (RRM superfamily)
A0A1U8G4K5	PORR domain-containing protein OS=Capsicum annuum OX=4072 GN=T459_07274 PE=4 SV=1	T459_07274	2.142	8.41162e-06	Up	46.7	1.332	1.41	1.35	0.618	0.661	0.631													chloroplast
A0A2G2Y5J9	Beta-hexosaminidase OS=Capsicum annuum OX=4072 GN=T459_29427 PE=3 SV=1	T459_29427	0.744	0.00105098	Down	59.3	0.853	0.893	0.806	1.103	1.172	1.157	0.917	0.93	0.928	1.09	1.023	1.053	1.026	1.009	1.034	0.972	0.932	0.98	chloroplast	K12373	HEXA_B; hexosaminidase [EC:3.2.1.52]	map00511 Other glycan degradation; map00513 Various types of N-glycan biosynthesis; map00520 Amino sugar and nucleotide sugar metabolism; map00531 Glycosaminoglycan degradation; map00603 Glycosphingolipid biosynthesis - globo and isoglobo series; map00604 Glycosphingolipid biosynthesis - ganglio series; map01100 Metabolic pathways		GO:0005618 cell wall; GO:0005623 cell; GO:0005886 plasma membrane; GO:0009505 plant-type cell wall; GO:0016020 membrane; GO:0030312 external encapsulating structure; GO:0071944 cell periphery;	GO:0003824 catalytic activity; GO:0004553 hydrolase activity, hydrolyzing O-glycosyl compounds; GO:0004563 beta-N-acetylhexosaminidase activity; GO:0015929 hexosaminidase activity; GO:0016787 hydrolase activity; GO:0016798 hydrolase activity, acting on glycosyl bonds;	PF00728	Glycosyl hydrolase family 20, catalytic domain	G	KOG2499	Beta-N-acetylhexosaminidase
A0A2G2YII0	40S ribosomal protein S11 OS=Capsicum annuum OX=4072 GN=T459_24624 PE=3 SV=1	T459_24624	1.304	0.000245377	Up	17.6	1.182	1.108	1.12	0.885	0.868	0.863	1.066	1.036	0.984	0.95	1.008	0.927	0.975	1.013	0.981	1.017	0.974	1.037	cytoplasm	K02949	RP-S11e, RPS11; small subunit ribosomal protein S11e	map03010 Ribosome				PF00366	Ribosomal protein S17	J	KOG1728	40S ribosomal protein S11
A0A1U8H9A4	Putative sucrose-phosphate synthase OS=Capsicum annuum OX=4072 GN=T459_19061 PE=3 SV=1	T459_19061	1.305	0.000731767	Up	118.6	1.109	1.182	1.095	0.881	0.838	0.876	0.993	0.999	0.986	0.996	1.053	0.987	0.942	0.92	0.926	1.098	1.086	1.058	nucleus	K00696	E2.4.1.14; sucrose-phosphate synthase [EC:2.4.1.14]	map00500 Starch and sucrose metabolism; map01100 Metabolic pathways	GO:0006810 transport; GO:0046903 secretion; GO:0051179 localization; GO:0051234 establishment of localization; GO:0071836 nectar secretion;	GO:0005622 intracellular; GO:0005623 cell; GO:0005737 cytoplasm; GO:0005829 cytosol; GO:0005886 plasma membrane; GO:0005911 cell-cell junction; GO:0009506 plasmodesma; GO:0016020 membrane; GO:0030054 cell junction; GO:0055044 symplast; GO:0071944 cell periphery;	GO:0003824 catalytic activity; GO:0008194 UDP-glycosyltransferase activity; GO:0016740 transferase activity; GO:0016757 transferase activity, transferring glycosyl groups; GO:0016758 transferase activity, transferring hexosyl groups; GO:0035251 UDP-glucosyltransferase activity; GO:0046524 sucrose-phosphate synthase activity; GO:0046527 glucosyltransferase activity;			M	KOG0853	Glycosyltransferase
A0A1U8H8Q9	FAD_binding_3 domain-containing protein OS=Capsicum annuum OX=4072 GN=T459_18807 PE=4 SV=1	T459_18807	0.641	0.0127562	Down	77.1	0.805	0.9	0.644	1.298	1.225	1.139	0.738	0.709	0.733	1.116	1.244	1.456	1.243	1.085	1.183	0.844	0.868	0.791	chloroplast
A0A2G2YZM4	60S ribosomal protein L10 OS=Capsicum annuum OX=4072 GN=T459_18708 PE=4 SV=1	T459_18708	1.323	0.000482782	Up	31.8	1.176	1.158	1.096	0.879	0.877	0.836							0.976	0.953	0.941	1.056	1.031	1.067	endoplasmic reticulum	K02866	RP-L10e, RPL10; large subunit ribosomal protein L10e	map03010 Ribosome	GO:0000027 ribosomal large subunit assembly; GO:0002252 immune effector process; GO:0002376 immune system process; GO:0006412 translation; GO:0006518 peptide metabolic process; GO:0006807 nitrogen compound metabolic process; GO:0006950 response to stress; GO:0006952 defense response; GO:0006996 organelle organization; GO:0008152 metabolic process; GO:0009058 biosynthetic process; GO:0009059 macro…	GO:0005622 intracellular; GO:0005623 cell; GO:0005634 nucleus; GO:0005730 nucleolus; GO:0005737 cytoplasm; GO:0005773 vacuole; GO:0005774 vacuolar membrane; GO:0005829 cytosol; GO:0005840 ribosome; GO:0005844 polysome; GO:0009507 chloroplast; GO:0009526 plastid envelope; GO:0009536 plastid; GO:0009941 chloroplast envelope; GO:0015934 large ribosomal subunit; GO:0016020 membrane; GO:0022625 cytoso…	GO:0003676 nucleic acid binding; GO:0003723 RNA binding; GO:0003729 mRNA binding; GO:0003735 structural constituent of ribosome; GO:0005198 structural molecule activity; GO:0005488 binding; GO:0097159 organic cyclic compound binding; GO:1901363 heterocyclic compound binding;			J	KOG0857	60s ribosomal protein L10
A0A1U8EDS8	Putative transmembrane protein-like(predicted) OS=Capsicum annuum OX=4072 GN=T459_24640 PE=4 SV=1	T459_24640	1.31	0.0163295	Up	72.8	1.184	1.131	1.09	0.802	0.981	0.817							0.946	1.045	0.928	1.059	0.998	1.032	plasma membrane									S	KOG2365	Uncharacterized membrane protein
A0A1U8F5N3	DNA-directed RNA polymerase subunit OS=Capsicum annuum OX=4072 GN=T459_33441 PE=3 SV=1	T459_33441	1.441	4.16751e-05	Up	155.4	1.19	1.176	1.18	0.824	0.792	0.844	0.971	0.994	1.06	0.964	1.002	1.015	0.904	0.876	0.936	1.061	1.134	1.143	nucleus	K03018	RPC1, POLR3A; DNA-directed RNA polymerase III subunit RPC1 [EC:2.7.7.6]	map03020 RNA polymerase	GO:0001817 regulation of cytokine production; GO:0001819 positive regulation of cytokine production; GO:0002376 immune system process; GO:0006139 nucleobase-containing compound metabolic process; GO:0006351 transcription, DNA-templated; GO:0006725 cellular aromatic compound metabolic process; GO:0006807 nitrogen compound metabolic process; GO:0006950 response to stress; GO:0006952 defense respons…	GO:0000428 DNA-directed RNA polymerase complex; GO:0005622 intracellular; GO:0005623 cell; GO:0005634 nucleus; GO:0005654 nucleoplasm; GO:0005666 RNA polymerase III complex; GO:0005737 cytoplasm; GO:0005829 cytosol; GO:0030880 RNA polymerase complex; GO:0031974 membrane-enclosed lumen; GO:0031981 nuclear lumen; GO:0032991 protein-containing complex; GO:0043226 organelle; GO:0043227 membrane-bound…	GO:0003824 catalytic activity; GO:0003899 DNA-directed 5'-3' RNA polymerase activity; GO:0016740 transferase activity; GO:0016772 transferase activity, transferring phosphorus-containing groups; GO:0016779 nucleotidyltransferase activity; GO:0034062 5'-3' RNA polymerase activity; GO:0097747 RNA polymerase activity; GO:0140098 catalytic activity, acting on RNA;	PF04997; PF00623; PF04983; PF05000; PF04998	RNA polymerase Rpb1, domain 1; RNA polymerase Rpb1, domain 2; RNA polymerase Rpb1, domain 3; RNA polymerase Rpb1, domain 4; RNA polymerase Rpb1, domain 5	K	KOG0261	RNA polymerase III, large subunit
A0A1U8DVW7	60S ribosomal protein L3 OS=Capsicum annuum OX=4072 GN=T459_33859 PE=3 SV=1	T459_33859	1.479	6.04951e-06	Up	44.3	1.213	1.184	1.164	0.808	0.8	0.8	1.019	1.028	1.004	1.02	0.958	0.982	1.002	0.993	0.943	1.048	1.028	1.018	cytoplasm	K02925	RP-L3e, RPL3; large subunit ribosomal protein L3e	map03010 Ribosome	GO:0000027 ribosomal large subunit assembly; GO:0006412 translation; GO:0006518 peptide metabolic process; GO:0006807 nitrogen compound metabolic process; GO:0006996 organelle organization; GO:0008152 metabolic process; GO:0009058 biosynthetic process; GO:0009059 macromolecule biosynthetic process; GO:0009987 cellular process; GO:0010467 gene expression; GO:0016043 cellular component organization…	GO:0005618 cell wall; GO:0005622 intracellular; GO:0005623 cell; GO:0005634 nucleus; GO:0005730 nucleolus; GO:0005737 cytoplasm; GO:0005773 vacuole; GO:0005774 vacuolar membrane; GO:0005829 cytosol; GO:0005840 ribosome; GO:0005844 polysome; GO:0005886 plasma membrane; GO:0005911 cell-cell junction; GO:0009506 plasmodesma; GO:0015934 large ribosomal subunit; GO:0016020 membrane; GO:0022625 cytosol…	GO:0003676 nucleic acid binding; GO:0003723 RNA binding; GO:0003729 mRNA binding; GO:0003735 structural constituent of ribosome; GO:0005198 structural molecule activity; GO:0005488 binding; GO:0097159 organic cyclic compound binding; GO:1901363 heterocyclic compound binding;			J	KOG0746	60S ribosomal protein L3 and related proteins
A0A2G3A3E7	LOW QUALITY PROTEIN: periodic tryptophan protein 2 homolog(predicted) OS=Capsicum annuum OX=4072 GN=T459_10864 PE=4 SV=1	T459_10864	1.559	4.0962e-05	Up	98.6	1.218	1.2	1.24	0.809	0.784	0.753							0.769	0.814	0.726	1.252	1.184	1.255	chloroplast	K14558	PWP2, UTP1; periodic tryptophan protein 2	map03008 Ribosome biogenesis in eukaryotes	GO:0000028 ribosomal small subunit assembly; GO:0000462 maturation of SSU-rRNA from tricistronic rRNA transcript (SSU-rRNA, 5.8S rRNA, LSU-rRNA); GO:0006139 nucleobase-containing compound metabolic process; GO:0006364 rRNA processing; GO:0006396 RNA processing; GO:0006725 cellular aromatic compound metabolic process; GO:0006807 nitrogen compound metabolic process; GO:0006996 organelle organizatio…	GO:0000151 ubiquitin ligase complex; GO:0005622 intracellular; GO:0005623 cell; GO:0005634 nucleus; GO:0005730 nucleolus; GO:0030684 preribosome; GO:0030686 90S preribosome; GO:0031461 cullin-RING ubiquitin ligase complex; GO:0031974 membrane-enclosed lumen; GO:0031981 nuclear lumen; GO:0032040 small-subunit processome; GO:0032991 protein-containing complex; GO:0034388 Pwp2p-containing subcomplex…	GO:0003676 nucleic acid binding; GO:0003723 RNA binding; GO:0005488 binding; GO:0030515 snoRNA binding; GO:0097159 organic cyclic compound binding; GO:1901363 heterocyclic compound binding;			A	KOG0291	WD40-repeat-containing subunit of the 18S rRNA processing complex
A0A2G3A055	Small heat shock protein, chloroplastic OS=Capsicum annuum OX=4072 GN=T459_09696 PE=3 SV=1	T459_09696	0.724	0.000176822	Down	25.8	0.848	0.855	0.809	1.185	1.12	1.166	0.984	0.996	0.972	0.998	1.007	0.977	0.881	0.687	0.827	1.189	1.214	1.173	chloroplast	K13993	HSP20; HSP20 family protein	map04141 Protein processing in endoplasmic reticulum	GO:0000302 response to reactive oxygen species; GO:0006355 regulation of transcription, DNA-templated; GO:0006950 response to stress; GO:0006979 response to oxidative stress; GO:0006996 organelle organization; GO:0009266 response to temperature stimulus; GO:0009314 response to radiation; GO:0009408 response to heat; GO:0009416 response to light stimulus; GO:0009628 response to abiotic stimulus; G…	GO:0005622 intracellular; GO:0005623 cell; GO:0005737 cytoplasm; GO:0009295 nucleoid; GO:0009507 chloroplast; GO:0009532 plastid stroma; GO:0009536 plastid; GO:0009570 chloroplast stroma; GO:0032991 protein-containing complex; GO:0042644 chloroplast nucleoid; GO:0042646 plastid nucleoid; GO:0043226 organelle; GO:0043227 membrane-bounded organelle; GO:0043228 non-membrane-bounded organelle; GO:004…	GO:0005488 binding; GO:0005515 protein binding; GO:0043621 protein self-association;			O	KOG0710	Molecular chaperone (small heat-shock protein Hsp26/Hsp42)
A0A2G3AD96	3-oxoacyl-[acyl-carrier-protein] synthase I, chloroplastic OS=Capsicum annuum OX=4072 GN=T459_00104 PE=3 SV=1	T459_00104	0.669	0.000159854	Down	52.8	0.823	0.825	0.766	1.223	1.164	1.219	1.027	0.975	1.07	1.072	0.954	0.912							chloroplast	K09458	fabF, OXSM, CEM1; 3-oxoacyl-[acyl-carrier-protein] synthase II [EC:2.3.1.179]	map00061 Fatty acid biosynthesis; map00780 Biotin metabolism; map01100 Metabolic pathways; map01212 Fatty acid metabolism				PF00109; PF02801	Beta-ketoacyl synthase, N-terminal domain; Beta-ketoacyl synthase, C-terminal domain	IQ	KOG1394	3-oxoacyl-(acyl-carrier-protein) synthase (I and II)
A0A2G2YJD3	Apoptosis inhibitory 5(predicted) OS=Capsicum annuum OX=4072 GN=T459_24943 PE=4 SV=1	T459_24943	1.352	0.00028332	Up	42.2	1.203	1.145	1.107	0.864	0.843	0.848	0.993	0.942	0.953	1.034	1.045	1.022	0.817	0.841	0.816	1.188	1.155	1.166	cytoplasm				GO:0007275 multicellular organism development; GO:0009555 pollen development; GO:0010941 regulation of cell death; GO:0032501 multicellular organismal process; GO:0032502 developmental process; GO:0043067 regulation of programmed cell death; GO:0048229 gametophyte development; GO:0048856 anatomical structure development; GO:0050789 regulation of biological process; GO:0050794 regulation of cellul…	GO:0005622 intracellular; GO:0005623 cell; GO:0005634 nucleus; GO:0043226 organelle; GO:0043227 membrane-bounded organelle; GO:0043229 intracellular organelle; GO:0043231 intracellular membrane-bounded organelle;				T	KOG2213	Apoptosis inhibitor 5/fibroblast growth factor 2-interacting factor 2, and related proteins
A0A2G2ZG25	Hydrolase_4 domain-containing protein OS=Capsicum annuum OX=4072 GN=T459_13876 PE=4 SV=1	T459_13876	0.462	1.39858e-05	Down	33.8	0.64	0.6	0.66	1.395	1.342	1.372													cytoplasm	K01054	MGLL; acylglycerol lipase [EC:3.1.1.23]	map00561 Glycerolipid metabolism; map01100 Metabolic pathways						I	KOG1455	Lysophospholipase
A0A2G2YHG0	Putative mannan synthase 9 OS=Capsicum annuum OX=4072 GN=T459_28626 PE=4 SV=1	T459_28626	1.36	0.00066491	Up	57.3	1.13	1.133	1.197	0.88	0.858	0.806	1.019	1.069	1.118	0.947	0.99	0.937	1.031	0.998	1.004	1.002	0.906	0.968	plasma membrane	K13680	CSLA; beta-mannan synthase [EC:2.4.1.32]					PF13632	Glycosyl transferase family group 2
A0A2G2Y0I0	Usp domain-containing protein OS=Capsicum annuum OX=4072 GN=T459_32892 PE=4 SV=1	T459_32892	0.733	0.000144308	Down	17.1	0.841	0.832	0.867	1.114	1.17	1.181	0.879	0.756	0.908	1.08	1.209	1.169	0.825	0.834	0.805	1.105	1.204	1.172	cytoplasm							PF00582	Universal stress protein family
A0A2G3AEX0	MADS-box domain-containing protein OS=Capsicum annuum OX=4072 GN=T459_00615 PE=4 SV=1	T459_00615	0.301	4.30528e-06	Down	19.4	0.481	0.466	0.443	1.587	1.57	1.463	1.063	1.053	1.006	0.967	0.97	0.95	1.15	1.135	1.162	0.88	0.835	0.85	cytoplasm							PF00319	SRF-type transcription factor (DNA-binding and dimerisation domain)	K	KOG0014	MADS box transcription factor
A0A2G2ZCG8	Putative ovule protein(predicted) OS=Capsicum annuum OX=4072 GN=T459_17696 PE=4 SV=1	T459_17696	0.769	0.00967374	Down	84	0.85	0.937	0.824	1.211	1.136	1.05													nucleus									L	KOG0017	FOG: Transposon-encoded proteins with TYA, reverse transcriptase, integrase domains in various combinations
A0A2G2YS75	ATP-binding cassette sub-family B member 7, mitochondrial OS=Capsicum annuum OX=4072 GN=T459_23266 PE=4 SV=1	T459_23266	1.409	0.000839918	Up	69.9	1.17	1.162	1.186	0.774	0.843	0.88	0.954	1.034	1.037	0.976	1.034	1.012	0.986	1.011	0.927	0.961	1.011	1.107	plasma membrane	K05663	ATM; ATP-binding cassette, subfamily B, mitochondrial transporter ATM	map02010 ABC transporters	GO:0006732 coenzyme metabolic process; GO:0006777 Mo-molybdopterin cofactor biosynthetic process; GO:0006793 phosphorus metabolic process; GO:0006796 phosphate-containing compound metabolic process; GO:0006807 nitrogen compound metabolic process; GO:0006873 cellular ion homeostasis; GO:0006875 cellular metal ion homeostasis; GO:0006879 cellular iron ion homeostasis; GO:0006996 organelle organizat…	GO:0005622 intracellular; GO:0005623 cell; GO:0005737 cytoplasm; GO:0005739 mitochondrion; GO:0005740 mitochondrial envelope; GO:0005743 mitochondrial inner membrane; GO:0009507 chloroplast; GO:0009526 plastid envelope; GO:0009536 plastid; GO:0009941 chloroplast envelope; GO:0016020 membrane; GO:0019866 organelle inner membrane; GO:0031090 organelle membrane; GO:0031966 mitochondrial membrane; GO…	GO:0005215 transporter activity;	PF00005	ABC transporter	Q	KOG0057	Mitochondrial Fe/S cluster exporter, ABC superfamily
A0A2G2Z2E6	60S acidic ribosomal protein P3 (Fragment) OS=Capsicum annuum OX=4072 GN=T459_19665 PE=4 SV=1	T459_19665	0.642	0.0118665	Down	8.7	0.723	0.876	0.75	1.386	1.228	1.046	0.946	0.885	0.954	1.055	1.102	1.062	0.912	0.791	0.663	1.316	1.105	1.218	chloroplast	K02942	RP-LP1, RPLP1; large subunit ribosomal protein LP1	map03010 Ribosome		GO:0005622 intracellular; GO:0005623 cell; GO:0005634 nucleus; GO:0005737 cytoplasm; GO:0005829 cytosol; GO:0005840 ribosome; GO:0005844 polysome; GO:0005886 plasma membrane; GO:0016020 membrane; GO:0022626 cytosolic ribosome; GO:0032991 protein-containing complex; GO:0042788 polysomal ribosome; GO:0043226 organelle; GO:0043227 membrane-bounded organelle; GO:0043228 non-membrane-bounded organelle…	GO:0003735 structural constituent of ribosome; GO:0005198 structural molecule activity;
A0A1U8FP70	SpoU_sub_bind domain-containing protein OS=Capsicum annuum OX=4072 GN=T459_05468 PE=4 SV=1	T459_05468	0.748	0.00327085	Down	52.9	0.912	0.785	0.873	1.172	1.148	1.118	1.04	0.99	1.038	1.011	1.01	0.919	1.034	0.943	1.08	0.973	0.969	1.01	chloroplast	K15507	MRM1, PET56; 21S rRNA (GM2251-2'-O)-methyltransferase [EC:2.1.1.-]		GO:0000154 rRNA modification; GO:0000451 rRNA 2'-O-methylation; GO:0000453 enzyme-directed rRNA 2'-O-methylation; GO:0001510 RNA methylation; GO:0006139 nucleobase-containing compound metabolic process; GO:0006364 rRNA processing; GO:0006396 RNA processing; GO:0006725 cellular aromatic compound metabolic process; GO:0006807 nitrogen compound metabolic process; GO:0008152 metabolic process; GO:000…	GO:0005622 intracellular; GO:0005623 cell; GO:0005737 cytoplasm; GO:0005739 mitochondrion; GO:0043226 organelle; GO:0043227 membrane-bounded organelle; GO:0043229 intracellular organelle; GO:0043231 intracellular membrane-bounded organelle;	GO:0003824 catalytic activity; GO:0008168 methyltransferase activity; GO:0008171 O-methyltransferase activity; GO:0008173 RNA methyltransferase activity; GO:0008649 rRNA methyltransferase activity; GO:0008757 S-adenosylmethionine-dependent methyltransferase activity; GO:0016435 rRNA (guanine) methyltransferase activity; GO:0016740 transferase activity; GO:0016741 transferase activity, transferrin…	PF08032	RNA 2'-O ribose methyltransferase substrate binding	A	KOG0838	RNA Methylase, SpoU family
A0A2G3AK17	Protein translocase subunit SecA, chloroplastic (Fragment) OS=Capsicum annuum OX=4072 GN=T459_02451 PE=4 SV=1	T459_02451	1.306	0.000744563	Up	70.5	1.136	1.102	1.148	0.82	0.885	0.888	0.952	0.985	0.992	1.028	1.06	1.028	0.92	0.924	0.972	1.087	1.075	1.063	cytoplasm	K03070	secA; preprotein translocase subunit SecA [EC:7.4.2.8]	map03060 Protein export	GO:0006810 transport; GO:0008104 protein localization; GO:0015031 protein transport; GO:0015833 peptide transport; GO:0033036 macromolecule localization; GO:0042886 amide transport; GO:0045184 establishment of protein localization; GO:0051179 localization; GO:0051234 establishment of localization; GO:0055085 transmembrane transport; GO:0071702 organic substance transport; GO:0071705 nitrogen comp…		GO:0000166 nucleotide binding; GO:0003824 catalytic activity; GO:0005215 transporter activity; GO:0005488 binding; GO:0005524 ATP binding; GO:0008144 drug binding; GO:0008320 protein transmembrane transporter activity; GO:0015399 primary active transmembrane transporter activity; GO:0015440 ATPase-coupled peptide transmembrane transporter activity; GO:0015450 P-P-bond-hydrolysis-driven protein tr…	PF07517	SecA DEAD-like domain
A0A1U8GAJ4	Endoplasmin-like protein OS=Capsicum annuum OX=4072 GN=T459_13407 PE=3 SV=1	T459_13407	0.74	5.88616e-05	Down	92.9	0.851	0.858	0.848	1.19	1.135	1.13	0.987	0.97	0.975	1.077	0.993	1.019	1.204	1.176	1.176	0.829	0.839	0.825	vacuolar membrane	K09487	HSP90B, TRA1; heat shock protein 90kDa beta	map04141 Protein processing in endoplasmic reticulum; map04626 Plant-pathogen interaction	GO:0001101 response to acid chemical; GO:0002790 peptide secretion; GO:0006810 transport; GO:0006950 response to stress; GO:0006970 response to osmotic stress; GO:0008104 protein localization; GO:0009266 response to temperature stimulus; GO:0009306 protein secretion; GO:0009409 response to cold; GO:0009414 response to water deprivation; GO:0009415 response to water; GO:0009628 response to abiotic…	GO:0005576 extracellular region; GO:0005622 intracellular; GO:0005623 cell; GO:0005634 nucleus; GO:0005737 cytoplasm; GO:0005739 mitochondrion; GO:0005773 vacuole; GO:0005774 vacuolar membrane; GO:0005783 endoplasmic reticulum; GO:0005788 endoplasmic reticulum lumen; GO:0005886 plasma membrane; GO:0005911 cell-cell junction; GO:0009506 plasmodesma; GO:0009507 chloroplast; GO:0009536 plastid; GO:0…	GO:0003824 catalytic activity; GO:0016462 pyrophosphatase activity; GO:0016787 hydrolase activity; GO:0016817 hydrolase activity, acting on acid anhydrides; GO:0016818 hydrolase activity, acting on acid anhydrides, in phosphorus-containing anhydrides; GO:0016887 ATPase activity; GO:0017111 nucleoside-triphosphatase activity;	PF02518	Histidine kinase-, DNA gyrase B-, and HSP90-like ATPase	O	KOG0020	Endoplasmic reticulum glucose-regulated protein (GRP94/endoplasmin), HSP90 family
A0A2G2YA28	RNA polymerase III subunit C3 OS=Capsicum annuum OX=4072 GN=T459_31040 PE=4 SV=1	T459_31040	1.394	7.09856e-05	Up	60.1	1.144	1.182	1.169	0.808	0.855	0.844							0.933	0.923	0.978	1.062	1.068	1.042	chloroplast	K03023	RPC3, POLR3C; DNA-directed RNA polymerase III subunit RPC3	map03020 RNA polymerase		GO:0000428 DNA-directed RNA polymerase complex; GO:0005622 intracellular; GO:0005623 cell; GO:0005634 nucleus; GO:0005654 nucleoplasm; GO:0005666 RNA polymerase III complex; GO:0030880 RNA polymerase complex; GO:0031974 membrane-enclosed lumen; GO:0031981 nuclear lumen; GO:0032991 protein-containing complex; GO:0043226 organelle; GO:0043227 membrane-bounded organelle; GO:0043229 intracellular org…		PF08221	RNA polymerase III subunit RPC82 helix-turn-helix domain	K	KOG2587	RNA polymerase III (C) subunit
A0A1U8GRR2	PKS_ER domain-containing protein OS=Capsicum annuum OX=4072 GN=T459_15554 PE=4 SV=1	T459_15554	0.75	0.000998411	Down	38.8	0.86	0.821	0.893	1.197	1.118	1.117	0.972	1	0.986	1.031	1.04	0.992	1.142	1.128	1.167	0.932	0.878	0.836	cytoplasm	K08070	E1.3.1.74; 2-alkenal reductase [EC:1.3.1.74]							S	KOG1196	Predicted NAD-dependent oxidoreductase
A0A2G2ZVY7	Callose synthase 1 OS=Capsicum annuum OX=4072 GN=T459_08256 PE=4 SV=1	T459_08256	1.418	0.000122884	Up	92.6	1.137	1.185	1.199	0.801	0.832	0.85	0.891	1.057	0.984	1.012	1.025	1.037	0.985	0.933	0.787	1.101	1.1	1.101	plasma membrane	K11000	CALS; callose synthase [EC:2.4.1.-]							M	KOG0916	1,3-beta-glucan synthase/callose synthase catalytic subunit
A0A2G2Y058	Presequence protease 2, chloroplastic/mitochondrial OS=Capsicum annuum OX=4072 GN=T459_33014 PE=4 SV=1	T459_33014	1.383	0.000110181	Up	47.1	1.175	1.174	1.135	0.853	0.857	0.81	0.944	0.997	0.883	1.044	1.088	1.014	0.875	0.935	0.881	1.099	1.157	1.079	mitochondria	K06972	PITRM1, PreP, CYM1; presequence protease [EC:3.4.24.-]		GO:0006508 proteolysis; GO:0006807 nitrogen compound metabolic process; GO:0008152 metabolic process; GO:0010035 response to inorganic substance; GO:0010038 response to metal ion; GO:0010467 gene expression; GO:0016485 protein processing; GO:0019538 protein metabolic process; GO:0042221 response to chemical; GO:0043170 macromolecule metabolic process; GO:0044238 primary metabolic process; GO:0046…	GO:0005576 extracellular region; GO:0005622 intracellular; GO:0005623 cell; GO:0005737 cytoplasm; GO:0005739 mitochondrion; GO:0005759 mitochondrial matrix; GO:0009507 chloroplast; GO:0009526 plastid envelope; GO:0009532 plastid stroma; GO:0009536 plastid; GO:0009570 chloroplast stroma; GO:0009941 chloroplast envelope; GO:0031967 organelle envelope; GO:0031974 membrane-enclosed lumen; GO:0031975 …	GO:0003824 catalytic activity; GO:0004175 endopeptidase activity; GO:0004222 metalloendopeptidase activity; GO:0008233 peptidase activity; GO:0008237 metallopeptidase activity; GO:0016787 hydrolase activity; GO:0070011 peptidase activity, acting on L-amino acid peptides; GO:0140096 catalytic activity, acting on a protein;	PF05193	Peptidase M16 inactive domain	O	KOG2019	Metalloendoprotease HMP1 (insulinase superfamily)
A0A1U8FR86	Ribonucleoside-diphosphate reductase small chain OS=Capsicum annuum OX=4072 GN=T459_07160 PE=4 SV=1	T459_07160	1.383	0.000148548	Up	37.7	1.13	1.166	1.153	0.808	0.819	0.866	1.101	1.064	1.092	0.891	0.95	0.926	0.865	0.963	0.814	1.141	1.08	1.124	cytoplasm	K10808	RRM2; ribonucleoside-diphosphate reductase subunit M2 [EC:1.17.4.1]	map00230 Purine metabolism; map00240 Pyrimidine metabolism; map00480 Glutathione metabolism; map01100 Metabolic pathways	GO:0006139 nucleobase-containing compound metabolic process; GO:0006259 DNA metabolic process; GO:0006260 DNA replication; GO:0006281 DNA repair; GO:0006725 cellular aromatic compound metabolic process; GO:0006807 nitrogen compound metabolic process; GO:0006950 response to stress; GO:0006974 cellular response to DNA damage stimulus; GO:0007275 multicellular organism development; GO:0008152 metabo…			PF00268	Ribonucleotide reductase, small chain	F	KOG1567	Ribonucleotide reductase, beta subunit
A0A1U8FC73	Thiamine thiazole synthase, chloroplastic OS=Capsicum annuum OX=4072 GN=THI1 PE=3 SV=1	THI1	0.691	0.000154992	Down	38	0.786	0.827	0.848	1.198	1.153	1.208	0.956	0.975	0.979	1.034	1.07	1.018	1.222	1.207	1.153	0.794	0.805	0.805	chloroplast	K03146	THI4, THI1; cysteine-dependent adenosine diphosphate thiazole synthase [EC:2.4.2.60]	map00730 Thiamine metabolism; map01100 Metabolic pathways	GO:0006725 cellular aromatic compound metabolic process; GO:0006766 vitamin metabolic process; GO:0006767 water-soluble vitamin metabolic process; GO:0006772 thiamine metabolic process; GO:0006790 sulfur compound metabolic process; GO:0006807 nitrogen compound metabolic process; GO:0008152 metabolic process; GO:0009058 biosynthetic process; GO:0009110 vitamin biosynthetic process; GO:0009228 thia…	GO:0005622 intracellular; GO:0005623 cell; GO:0005737 cytoplasm; GO:0005829 cytosol;	GO:0005488 binding; GO:0005506 iron ion binding; GO:0043167 ion binding; GO:0043169 cation binding; GO:0046872 metal ion binding; GO:0046914 transition metal ion binding;			H	KOG2960	Protein involved in thiamine biosynthesis and DNA damage tolerance
A0A1U8FW92	RNA helicase OS=Capsicum annuum OX=4072 GN=T459_10291 PE=3 SV=1	T459_10291	1.328	0.000806829	Up	65.3	1.082	1.171	1.172	0.876	0.832	0.871	1.013	0.988	0.982	0.98	1.041	1.004	0.854	0.82	1.107	1.237	0.873	1.113	cytoplasm	K13179	DDX18, HAS1; ATP-dependent RNA helicase DDX18/HAS1 [EC:3.6.4.13]		GO:0006139 nucleobase-containing compound metabolic process; GO:0006725 cellular aromatic compound metabolic process; GO:0006807 nitrogen compound metabolic process; GO:0008152 metabolic process; GO:0009987 cellular process; GO:0010501 RNA secondary structure unwinding; GO:0016070 RNA metabolic process; GO:0034641 cellular nitrogen compound metabolic process; GO:0043170 macromolecule metabolic pr…	GO:0005622 intracellular; GO:0005623 cell; GO:0005634 nucleus; GO:0005730 nucleolus; GO:0005737 cytoplasm; GO:0031974 membrane-enclosed lumen; GO:0031981 nuclear lumen; GO:0043226 organelle; GO:0043227 membrane-bounded organelle; GO:0043228 non-membrane-bounded organelle; GO:0043229 intracellular organelle; GO:0043231 intracellular membrane-bounded organelle; GO:0043232 intracellular non-membrane…	GO:0003724 RNA helicase activity; GO:0003824 catalytic activity; GO:0004386 helicase activity; GO:0008186 RNA-dependent ATPase activity; GO:0016462 pyrophosphatase activity; GO:0016787 hydrolase activity; GO:0016817 hydrolase activity, acting on acid anhydrides; GO:0016818 hydrolase activity, acting on acid anhydrides, in phosphorus-containing anhydrides; GO:0016887 ATPase activity; GO:0017111 nu…	PF00270; PF13959	DEAD/DEAH box helicase; Domain of unknown function (DUF4217)	A	KOG0342	ATP-dependent RNA helicase pitchoune
A0A2G2ZR37	Sucrose transport protein SUT2 OS=Capsicum annuum OX=4072 GN=T459_12864 PE=4 SV=1	T459_12864	1.364	0.000541767	Up	53.8	1.155	1.16	1.149	0.846	0.802	0.892	0.83	1.112	1.039	1.053	1.148	0.823	0.961	1.059	1.11	1.081	0.985	0.812	plasma membrane	K15378	SLC45A1_2_4; solute carrier family 45, member 1/2/4			GO:0000325 plant-type vacuole; GO:0005622 intracellular; GO:0005623 cell; GO:0005737 cytoplasm; GO:0005773 vacuole; GO:0005774 vacuolar membrane; GO:0009705 plant-type vacuole membrane; GO:0016020 membrane; GO:0031090 organelle membrane; GO:0043226 organelle; GO:0043227 membrane-bounded organelle; GO:0043229 intracellular organelle; GO:0043231 intracellular membrane-bounded organelle; GO:0098588 …				G	KOG0637	Sucrose transporter and related proteins
A0A2G2ZKK2	Copper transport protein ATX1 OS=Capsicum annuum OX=4072 GN=T459_15490 PE=4 SV=1	T459_15490	0.728	0.000259201	Down	7.5	0.874	0.83	0.825	1.188	1.117	1.17	0.96	0.965	0.97	1.008	1.035	1.027	1.019	0.958	0.958	1.045	1.036	0.992	chloroplast	K07213	ATOX1, ATX1, copZ, golB; copper chaperone		GO:0006810 transport; GO:0006811 ion transport; GO:0006812 cation transport; GO:0006873 cellular ion homeostasis; GO:0006875 cellular metal ion homeostasis; GO:0009987 cellular process; GO:0019725 cellular homeostasis; GO:0030001 metal ion transport; GO:0030003 cellular cation homeostasis; GO:0042592 homeostatic process; GO:0046916 cellular transition metal ion homeostasis; GO:0048878 chemical ho…	GO:0005622 intracellular; GO:0005623 cell; GO:0005737 cytoplasm;	GO:0005488 binding; GO:0043167 ion binding; GO:0043169 cation binding; GO:0046872 metal ion binding; GO:0046914 transition metal ion binding;	PF00403	Heavy-metal-associated domain	P	KOG1603	Copper chaperone
A0A1U8H6U4	outer envelope membrane protein 7-like(predicted) OS=Capsicum annuum OX=4072 GN=T459_18550 PE=4 SV=1	T459_18550	1.354	0.0253247	Up	8.1	1.129	1.112	1.211	0.734	0.832	0.984	1.079	1.337	0.948	0.858	0.95	0.841	0.918	1.075	1	1.073	0.942	1	extracellular	K03062	PSMC1, RPT2; 26S proteasome regulatory subunit T2	map03050 Proteasome		GO:0005622 intracellular; GO:0005623 cell; GO:0005737 cytoplasm; GO:0009507 chloroplast; GO:0009526 plastid envelope; GO:0009527 plastid outer membrane; GO:0009536 plastid; GO:0009707 chloroplast outer membrane; GO:0009941 chloroplast envelope; GO:0016020 membrane; GO:0016021 integral component of membrane; GO:0019867 outer membrane; GO:0031090 organelle membrane; GO:0031224 intrinsic component o…
A0A2G2ZQ87	Midasin OS=Capsicum annuum OX=4072 GN=T459_12557 PE=3 SV=1	T459_12557	1.336	0.00102904	Up	617.4	1.073	1.182	1.178	0.837	0.869	0.864	0.981	1.122	0.854	0.954	0.988	1.108	1.097	1.034	0.925	1.004	0.958	0.993	cytoplasm	K14572	MDN1, REA1; midasin	map03008 Ribosome biogenesis in eukaryotes	GO:0000027 ribosomal large subunit assembly; GO:0006139 nucleobase-containing compound metabolic process; GO:0006364 rRNA processing; GO:0006396 RNA processing; GO:0006725 cellular aromatic compound metabolic process; GO:0006807 nitrogen compound metabolic process; GO:0006996 organelle organization; GO:0007275 multicellular organism development; GO:0008152 metabolic process; GO:0009553 embryo sac…	GO:0005622 intracellular; GO:0005623 cell; GO:0005737 cytoplasm; GO:0005911 cell-cell junction; GO:0009506 plasmodesma; GO:0009507 chloroplast; GO:0009526 plastid envelope; GO:0009536 plastid; GO:0009941 chloroplast envelope; GO:0030054 cell junction; GO:0030684 preribosome; GO:0030687 preribosome, large subunit precursor; GO:0031967 organelle envelope; GO:0031975 envelope; GO:0032991 protein-con…	GO:0003824 catalytic activity; GO:0005488 binding; GO:0005509 calcium ion binding; GO:0016462 pyrophosphatase activity; GO:0016787 hydrolase activity; GO:0016817 hydrolase activity, acting on acid anhydrides; GO:0016818 hydrolase activity, acting on acid anhydrides, in phosphorus-containing anhydrides; GO:0016887 ATPase activity; GO:0017111 nucleoside-triphosphatase activity; GO:0043167 ion bindi…	PF07728	AAA domain (dynein-related subfamily)	S	KOG1808	AAA ATPase containing von Willebrand factor type A (vWA) domain
A0A2G3ALD8	putative fasciclin-like arabinogalactan protein 20(predicted) OS=Capsicum annuum OX=4072 GN=T459_02900 PE=4 SV=1	T459_02900	0.762	0.000709074	Down	21.8	0.896	0.822	0.881	1.111	1.156	1.142													chloroplast
A0A2G2Y922	AAA domain-containing protein OS=Capsicum annuum OX=4072 GN=T459_30691 PE=4 SV=1	T459_30691	1.478	0.000766167	Up	59	1.196	1.182	1.204	0.842	0.84	0.741	1.013	0.947	0.974	1.045	1.002	1.026							chloroplast				GO:0006810 transport; GO:0008104 protein localization; GO:0009987 cellular process; GO:0015031 protein transport; GO:0015833 peptide transport; GO:0016043 cellular component organization; GO:0022607 cellular component assembly; GO:0033036 macromolecule localization; GO:0034622 cellular protein-containing complex assembly; GO:0042886 amide transport; GO:0043933 protein-containing complex subunit o…	GO:0005622 intracellular; GO:0005623 cell; GO:0005737 cytoplasm; GO:0005739 mitochondrion; GO:0043226 organelle; GO:0043227 membrane-bounded organelle; GO:0043229 intracellular organelle; GO:0043231 intracellular membrane-bounded organelle;	GO:0005215 transporter activity; GO:0008320 protein transmembrane transporter activity; GO:0022857 transmembrane transporter activity; GO:0022884 macromolecule transmembrane transporter activity; GO:0042887 amide transmembrane transporter activity; GO:1904680 peptide transmembrane transporter activity;	PF00004	ATPase family associated with various cellular activities (AAA)	O	KOG0743	AAA+-type ATPase
A0A1U8HNR9	Non-specific lipid-transfer protein OS=Capsicum annuum OX=4072 GN=T459_21982 PE=3 SV=1	T459_21982	0.658	0.00071505	Down	16	0.81	0.785	0.79	1.268	1.249	1.106	0.87	0.897	0.857	1.154	1.129	1.106	1.045	1.09	1.059	0.944	0.973	0.916	extracellular
A0A2G2YZR6	ribonuclease S-4-like(predicted) OS=Capsicum annuum OX=4072 GN=T459_18735 PE=3 SV=1	T459_18735	0.666	0.00273311	Down	38.1	0.8	0.879	0.722	1.15	1.254	1.203	1.023	1.013	1.09	0.978	0.946	1	1.146	1.159	1.088	0.9	0.899	0.821	nucleus	K01166	RNASET2; ribonuclease T2 [EC:4.6.1.19]			GO:0005622 intracellular; GO:0005623 cell; GO:0005737 cytoplasm;		PF00445	Ribonuclease T2 family	S	KOG1642	Ribonuclease, T2 family
A0A2G3ANH6	Monodehydroascorbate reductase OS=Capsicum annuum OX=4072 GN=T459_03661 PE=4 SV=1	T459_03661	1.503	0.000163589	Up	43.3	1.263	1.181	1.162	0.779	0.821	0.799	1.406	1.33	1.366	0.612	0.669	0.636	1.525	1.549	1.488	0.473	0.504	0.487	chloroplast	K08232	E1.6.5.4; monodehydroascorbate reductase (NADH) [EC:1.6.5.4]	map00053 Ascorbate and aldarate metabolism; map01100 Metabolic pathways	GO:0001101 response to acid chemical; GO:0006950 response to stress; GO:0006970 response to osmotic stress; GO:0008152 metabolic process; GO:0009056 catabolic process; GO:0009414 response to water deprivation; GO:0009415 response to water; GO:0009605 response to external stimulus; GO:0009607 response to biotic stimulus; GO:0009608 response to symbiont; GO:0009610 response to symbiotic fungus; GO:…	GO:0005622 intracellular; GO:0005623 cell; GO:0005737 cytoplasm; GO:0005777 peroxisome; GO:0005778 peroxisomal membrane; GO:0005829 cytosol; GO:0009507 chloroplast; GO:0009526 plastid envelope; GO:0009532 plastid stroma; GO:0009536 plastid; GO:0009570 chloroplast stroma; GO:0009941 chloroplast envelope; GO:0016020 membrane; GO:0031090 organelle membrane; GO:0031903 microbody membrane; GO:0031967 …	GO:0003824 catalytic activity; GO:0016491 oxidoreductase activity; GO:0016651 oxidoreductase activity, acting on NAD(P)H; GO:0016655 oxidoreductase activity, acting on NAD(P)H, quinone or similar compound as acceptor; GO:0016656 monodehydroascorbate reductase (NADH) activity;	PF07992	Pyridine nucleotide-disulphide oxidoreductase	C	KOG1336	Monodehydroascorbate/ferredoxin reductase
A0A2G2YSQ8	H15 domain-containing protein OS=Capsicum annuum OX=4072 GN=T459_23575 PE=3 SV=1	T459_23575	1.427	5.11137e-06	Up	17	1.161	1.196	1.174	0.83	0.814	0.83	1.007	1.199	1.011	0.959	0.915	0.919	1.134	1.186	1.108	0.876	0.861	0.849	cytoplasm	K11275	H1_5; histone H1/5					PF00538	linker histone H1 and H5 family
A0A2G2ZRF5	GPN-loop GTPase 2 OS=Capsicum annuum OX=4072 GN=T459_12974 PE=3 SV=1	T459_12974	1.301	5.43032e-05	Up	34.3	1.137	1.153	1.106	0.883	0.867	0.86	0.992	0.946	0.954	1.064	1.046	1.004	1.031	0.992	0.997	1.02	0.982	0.986	cytoplasm	K06883	K06883; uncharacterized protein		GO:0000003 reproduction; GO:0003006 developmental process involved in reproduction; GO:0006996 organelle organization; GO:0007275 multicellular organism development; GO:0009657 plastid organization; GO:0009658 chloroplast organization; GO:0009790 embryo development; GO:0009791 post-embryonic development; GO:0009793 embryo development ending in seed dormancy; GO:0009888 tissue development; GO:0009…	GO:0005622 intracellular; GO:0005623 cell; GO:0005737 cytoplasm; GO:0005856 cytoskeleton; GO:0005874 microtubule; GO:0015630 microtubule cytoskeleton; GO:0043226 organelle; GO:0043228 non-membrane-bounded organelle; GO:0043229 intracellular organelle; GO:0043232 intracellular non-membrane-bounded organelle; GO:0099080 supramolecular complex; GO:0099081 supramolecular polymer; GO:0099512 supramole…	GO:0003824 catalytic activity; GO:0003924 GTPase activity; GO:0016462 pyrophosphatase activity; GO:0016787 hydrolase activity; GO:0016817 hydrolase activity, acting on acid anhydrides; GO:0016818 hydrolase activity, acting on acid anhydrides, in phosphorus-containing anhydrides; GO:0017111 nucleoside-triphosphatase activity;	PF03029	Conserved hypothetical ATP binding protein	S	KOG1533	Predicted GTPase
A0A2G2ZDT9	Protein disulfide isomerase-like 1-4 OS=Capsicum annuum OX=4072 GN=T459_18166 PE=4 SV=1	T459_18166	0.683	0.0460861	Down	58.6	0.713	0.747	0.977	0.986	1.329	1.252							0.724	0.735	0.747	1.242	1.323	1.244	chloroplast	K09580	PDIA1, P4HB; protein disulfide-isomerase A1 [EC:5.3.4.1]	map04141 Protein processing in endoplasmic reticulum	GO:0006457 protein folding; GO:0006950 response to stress; GO:0009987 cellular process; GO:0033554 cellular response to stress; GO:0034976 response to endoplasmic reticulum stress; GO:0050896 response to stimulus; GO:0051716 cellular response to stimulus;	GO:0005622 intracellular; GO:0005623 cell; GO:0005737 cytoplasm; GO:0005783 endoplasmic reticulum; GO:0012505 endomembrane system; GO:0043226 organelle; GO:0043227 membrane-bounded organelle; GO:0043229 intracellular organelle; GO:0043231 intracellular membrane-bounded organelle;	GO:0003756 protein disulfide isomerase activity; GO:0003824 catalytic activity; GO:0016853 isomerase activity; GO:0016860 intramolecular oxidoreductase activity; GO:0016864 intramolecular oxidoreductase activity, transposing S-S bonds; GO:0140096 catalytic activity, acting on a protein;	PF00085; PF13848	Thioredoxin; Thioredoxin-like domain	O	KOG0190	Protein disulfide isomerase (prolyl 4-hydroxylase beta subunit)
A0A2G2YZW4	Protein kinase domain-containing protein OS=Capsicum annuum OX=4072 GN=T459_18810 PE=4 SV=1	T459_18810	3.431	5.91273e-05	Up	48.5	1.57	1.442	1.634	0.426	0.506	0.422													cytoplasm							PF07714	Protein tyrosine kinase	T	KOG1187	Serine/threonine protein kinase
A0A1U8GH79	Remorin OS=Capsicum annuum OX=4072 GN=T459_00338 PE=4 SV=1	T459_00338	0.728	0.000244673	Down	22.2	0.806	0.854	0.871	1.16	1.179	1.136	0.958	0.962	0.989	1.032	1.025	1.001	0.993	0.986	0.964	1.021	1.028	0.994	mitochondria
A0A1U8F5B7	Caffeoyl-CoA O-methyltransferase OS=Capsicum annuum OX=4072 GN=T459_12262 PE=4 SV=1	T459_12262	0.641	3.84851e-05	Down	31.7	0.749	0.797	0.777	1.239	1.183	1.204	1.026	1.035	1.124	0.954	0.905	0.943	1.188	1.185	1.203	0.797	0.845	0.81	chloroplast	K00588	E2.1.1.104; caffeoyl-CoA O-methyltransferase [EC:2.1.1.104]	map00940 Phenylpropanoid biosynthesis; map00941 Flavonoid biosynthesis; map00945 Stilbenoid, diarylheptanoid and gingerol biosynthesis; map01100 Metabolic pathways; map01110 Biosynthesis of secondary metabolites				PF01596	O-methyltransferase	Q	KOG1663	O-methyltransferase
A0A2G3A1T0	RNA-dependent RNA polymerase OS=Capsicum annuum OX=4072 GN=T459_10266 PE=3 SV=1	T459_10266	1.488	0.00407575	Up	128.2	1.238	1.208	1.145	0.847	0.706	0.861													nucleus	K11699	RDR, RDRP; RNA-dependent RNA polymerase [EC:2.7.7.48]		GO:0006139 nucleobase-containing compound metabolic process; GO:0006325 chromatin organization; GO:0006342 chromatin silencing; GO:0006355 regulation of transcription, DNA-templated; GO:0006396 RNA processing; GO:0006725 cellular aromatic compound metabolic process; GO:0006807 nitrogen compound metabolic process; GO:0006950 response to stress; GO:0006952 defense response; GO:0006996 organelle org…	GO:0005622 intracellular; GO:0005623 cell; GO:0005634 nucleus; GO:0005730 nucleolus; GO:0031974 membrane-enclosed lumen; GO:0031981 nuclear lumen; GO:0043226 organelle; GO:0043227 membrane-bounded organelle; GO:0043228 non-membrane-bounded organelle; GO:0043229 intracellular organelle; GO:0043231 intracellular membrane-bounded organelle; GO:0043232 intracellular non-membrane-bounded organelle; GO…				H	KOG0988	RNA-directed RNA polymerase QDE-1 required for posttranscriptional gene silencing and RNA interference
A0A2G2ZQ64	Dirigent protein OS=Capsicum annuum OX=4072 GN=T459_12530 PE=3 SV=1	T459_12530	0.343	1.86188e-05	Down	8.2	0.493	0.499	0.543	1.45	1.432	1.591							0.645	0.782	0.888	1.214	1.217	1.252	cytoplasm
A0A1U8FQK2	Delta(24)-sterol reductase OS=Capsicum annuum OX=4072 GN=T459_05054 PE=4 SV=1	T459_05054	1.414	1.11537e-05	Up	66	1.153	1.189	1.16	0.832	0.833	0.811	0.967	0.996	0.979	1.009	1.018	1.025	0.992	0.963	0.962	1.039	1.042	1.046	cytoplasm	K09828	DHCR24, DWF1; Delta24-sterol reductase [EC:1.3.1.72 1.3.1.-]	map00100 Steroid biosynthesis; map01100 Metabolic pathways; map01110 Biosynthesis of secondary metabolites				PF01565	FAD binding domain	C	KOG1262	FAD-binding protein DIMINUTO
A0A2G3A1K7	DDT domain-containing protein DDR4(predicted) OS=Capsicum annuum OX=4072 GN=T459_10220 PE=4 SV=1	T459_10220	1.31	0.00124069	Up	69.3	1.089	1.169	1.147	0.826	0.871	0.902													chloroplast
A0A2G2ZL76	Putative cell wall protein AWA1-like(predicted) OS=Capsicum annuum OX=4072 GN=T459_11117 PE=4 SV=1	T459_11117	0.744	0.000294982	Down	90	0.894	0.848	0.821	1.157	1.144	1.144	1.085	1.012	1.017	0.939	1.026	0.93							nucleus
A0A2G3ADA6	AAA domain-containing protein OS=Capsicum annuum OX=4072 GN=T459_00114 PE=4 SV=1	T459_00114	1.407	0.000461025	Up	106.5	1.162	1.208	1.14	0.786	0.852	0.856	0.965	0.998	0.968	0.994	1.111	1.004	0.944	0.779	1.004	1.13	1.154	0.992	chloroplast				GO:0000003 reproduction; GO:0003006 developmental process involved in reproduction; GO:0006508 proteolysis; GO:0006807 nitrogen compound metabolic process; GO:0006996 organelle organization; GO:0007275 multicellular organism development; GO:0008152 metabolic process; GO:0009657 plastid organization; GO:0009658 chloroplast organization; GO:0009790 embryo development; GO:0009791 post-embryonic deve…	GO:0005622 intracellular; GO:0005623 cell; GO:0005737 cytoplasm; GO:0005739 mitochondrion; GO:0009507 chloroplast; GO:0009526 plastid envelope; GO:0009528 plastid inner membrane; GO:0009536 plastid; GO:0009706 chloroplast inner membrane; GO:0009941 chloroplast envelope; GO:0016020 membrane; GO:0019866 organelle inner membrane; GO:0031090 organelle membrane; GO:0031967 organelle envelope; GO:00319…	GO:0003824 catalytic activity; GO:0004176 ATP-dependent peptidase activity; GO:0008233 peptidase activity; GO:0008237 metallopeptidase activity; GO:0016462 pyrophosphatase activity; GO:0016787 hydrolase activity; GO:0016817 hydrolase activity, acting on acid anhydrides; GO:0016818 hydrolase activity, acting on acid anhydrides, in phosphorus-containing anhydrides; GO:0016887 ATPase activity; GO:00…	PF00004; PF01434	ATPase family associated with various cellular activities (AAA); Peptidase family M41	O	KOG0731	AAA+-type ATPase containing the peptidase M41 domain
A0A2G3AIG1	Importin N-terminal domain-containing protein OS=Capsicum annuum OX=4072 GN=T459_01907 PE=4 SV=1	T459_01907	1.356	9.01349e-05	Up	123.1	1.161	1.162	1.13	0.851	0.823	0.872	0.976	0.943	0.941	1.071	0.995	1.04	0.838	0.883	0.869	1.142	1.168	1.143	plasma membrane	K20222	IPO5, KPNB3, RANBP5; importin-5		GO:0001101 response to acid chemical; GO:0006606 protein import into nucleus; GO:0006607 NLS-bearing protein import into nucleus; GO:0006610 ribosomal protein import into nucleus; GO:0006810 transport; GO:0006886 intracellular protein transport; GO:0006913 nucleocytoplasmic transport; GO:0008104 protein localization; GO:0009719 response to endogenous stimulus; GO:0009987 cellular process; GO:0010…	GO:0005622 intracellular; GO:0005623 cell; GO:0005634 nucleus; GO:0005635 nuclear envelope; GO:0005737 cytoplasm; GO:0012505 endomembrane system; GO:0016020 membrane; GO:0031090 organelle membrane; GO:0031965 nuclear membrane; GO:0031967 organelle envelope; GO:0031974 membrane-enclosed lumen; GO:0031975 envelope; GO:0031981 nuclear lumen; GO:0034399 nuclear periphery; GO:0043226 organelle; GO:004…	GO:0005048 signal sequence binding; GO:0005215 transporter activity; GO:0005488 binding; GO:0008139 nuclear localization sequence binding; GO:0033218 amide binding; GO:0042277 peptide binding;			UY	KOG2171	Karyopherin (importin) beta 3
A0A2G2YHV6	Protein disulfide-isomerase OS=Capsicum annuum OX=4072 GN=T459_28776 PE=3 SV=1	T459_28776	0.726	4.94929e-06	Down	65.1	0.843	0.828	0.852	1.166	1.147	1.16	0.895	0.915	0.905	1.108	1.053	1.091	1.091	1.075	1.044	0.965	0.95	0.901	endoplasmic reticulum	K09580	PDIA1, P4HB; protein disulfide-isomerase A1 [EC:5.3.4.1]	map04141 Protein processing in endoplasmic reticulum	GO:0006457 protein folding; GO:0006950 response to stress; GO:0009987 cellular process; GO:0033554 cellular response to stress; GO:0034976 response to endoplasmic reticulum stress; GO:0050896 response to stimulus; GO:0051716 cellular response to stimulus;	GO:0005622 intracellular; GO:0005623 cell; GO:0005737 cytoplasm; GO:0005783 endoplasmic reticulum; GO:0012505 endomembrane system; GO:0043226 organelle; GO:0043227 membrane-bounded organelle; GO:0043229 intracellular organelle; GO:0043231 intracellular membrane-bounded organelle;	GO:0003756 protein disulfide isomerase activity; GO:0003824 catalytic activity; GO:0016853 isomerase activity; GO:0016860 intramolecular oxidoreductase activity; GO:0016864 intramolecular oxidoreductase activity, transposing S-S bonds; GO:0140096 catalytic activity, acting on a protein;	PF00085; PF13848	Thioredoxin; Thioredoxin-like domain	O	KOG0190	Protein disulfide isomerase (prolyl 4-hydroxylase beta subunit)
A0A1U8FIG7	UPF0301 protein CHU_1773-like(predicted) OS=Capsicum annuum OX=4072 GN=T459_04732 PE=4 SV=1	T459_04732	1.302	0.00041816	Up	33.4	1.106	1.119	1.125	0.899	0.833	0.841	1.084	0.893	1.06	0.969	1.041	0.96	0.988	1.06	0.978	0.849	1.088	1.046	chloroplast	K07735	algH; putative transcriptional regulator
A0A1U8GKR7	Ribosome biogenesis protein BRX1-like protein OS=Capsicum annuum OX=4072 GN=T459_13618 PE=4 SV=1	T459_13618	1.464	0.00637254	Up	36.7	1.128	1.16	1.279	0.714	0.87	0.852													nucleus	K14820	BRX1, BRIX1; ribosome biogenesis protein BRX1		GO:0000027 ribosomal large subunit assembly; GO:0006139 nucleobase-containing compound metabolic process; GO:0006364 rRNA processing; GO:0006396 RNA processing; GO:0006725 cellular aromatic compound metabolic process; GO:0006807 nitrogen compound metabolic process; GO:0006996 organelle organization; GO:0008152 metabolic process; GO:0009987 cellular process; GO:0010467 gene expression; GO:0016043 …	GO:0005622 intracellular; GO:0005623 cell; GO:0005634 nucleus; GO:0005730 nucleolus; GO:0005737 cytoplasm; GO:0005829 cytosol; GO:0031974 membrane-enclosed lumen; GO:0031981 nuclear lumen; GO:0043226 organelle; GO:0043227 membrane-bounded organelle; GO:0043228 non-membrane-bounded organelle; GO:0043229 intracellular organelle; GO:0043231 intracellular membrane-bounded organelle; GO:0043232 intrac…	GO:0003676 nucleic acid binding; GO:0003723 RNA binding; GO:0005488 binding; GO:0097159 organic cyclic compound binding; GO:1901363 heterocyclic compound binding;	PF04427	Brix domain	J	KOG2971	RNA-binding protein required for biogenesis of the ribosomal 60S subunit
A0A2G3AI84	Cysteine proteinase inhibitor OS=Capsicum annuum OX=4072 GN=T459_01838 PE=3 SV=1	T459_01838	0.765	0.000607067	Down	8.6	0.866	0.857	0.881	1.12	1.191	1.091	0.965	0.961	0.937	0.997	1.02	1.124	1.206	1.238	1.122	0.832	0.792	0.826	chloroplast				GO:0001101 response to acid chemical; GO:0006950 response to stress; GO:0006970 response to osmotic stress; GO:0006972 hyperosmotic response; GO:0006979 response to oxidative stress; GO:0009266 response to temperature stimulus; GO:0009409 response to cold; GO:0009414 response to water deprivation; GO:0009415 response to water; GO:0009628 response to abiotic stimulus; GO:0009892 negative regulatio…		GO:0002020 protease binding; GO:0004857 enzyme inhibitor activity; GO:0004866 endopeptidase inhibitor activity; GO:0004869 cysteine-type endopeptidase inhibitor activity; GO:0005488 binding; GO:0005515 protein binding; GO:0019899 enzyme binding; GO:0030234 enzyme regulator activity; GO:0030414 peptidase inhibitor activity; GO:0061134 peptidase regulator activity; GO:0061135 endopeptidase regulato…
A0A1U8EAH7	Pyruvate kinase OS=Capsicum annuum OX=4072 GN=T459_26128 PE=3 SV=1	T459_26128	1.373	0.000123772	Up	57.3	1.137	1.188	1.147	0.839	0.869	0.82	0.992	1.014	0.984	1.053	1.006	0.979	1.033	1.009	1.007	0.972	0.962	0.994	cytoplasm	K00873	PK, pyk; pyruvate kinase [EC:2.7.1.40]	map00010 Glycolysis / Gluconeogenesis; map00230 Purine metabolism; map00620 Pyruvate metabolism; map01100 Metabolic pathways; map01110 Biosynthesis of secondary metabolites; map01200 Carbon metabolism; map01230 Biosynthesis of amino acids				PF02887	Pyruvate kinase, alpha/beta domain	G	KOG2323	Pyruvate kinase
A0A2G2XYN9	Flavin-containing monooxygenase OS=Capsicum annuum OX=4072 GN=T459_33553 PE=3 SV=1	T459_33553	1.463	9.5536e-05	Up	59.9	1.195	1.219	1.153	0.797	0.799	0.842	1.207	1.267	1.16	0.78	0.802	0.798							nucleus	K00485	FMO; dimethylaniline monooxygenase (N-oxide forming) [EC:1.14.13.8]		GO:0001666 response to hypoxia; GO:0002218 activation of innate immune response; GO:0002253 activation of immune response; GO:0002376 immune system process; GO:0002682 regulation of immune system process; GO:0002684 positive regulation of immune system process; GO:0006950 response to stress; GO:0006952 defense response; GO:0006955 immune response; GO:0007154 cell communication; GO:0007165 signal …		GO:0003824 catalytic activity; GO:0004497 monooxygenase activity; GO:0016491 oxidoreductase activity;			Q	KOG1399	Flavin-containing monooxygenase
A0A1U8FVW2	Heat shock 70 kDa protein OS=Capsicum annuum OX=4072 GN=T459_10610 PE=3 SV=1	T459_10610	0.727	0.000208149	Down	71.5	0.82	0.828	0.883	1.176	1.165	1.142	0.898	0.941	1.048	1.014	1.082	1.021							cytoplasm	K03283	HSPA1s; heat shock 70kDa protein 1/2/6/8	map03040 Spliceosome; map04141 Protein processing in endoplasmic reticulum; map04144 Endocytosis						O	KOG0101	Molecular chaperones HSP70/HSC70, HSP70 superfamily
A0A2G2ZFC4	Zinc-metallopeptidase, peroxisomal OS=Capsicum annuum OX=4072 GN=T459_13636 PE=3 SV=1	T459_13636	1.332	3.30256e-08	Up	112.2	1.143	1.139	1.135	0.853	0.856	0.857	0.932	0.911	0.922	1.091	1.079	1.085	0.872	0.818	0.858	1.155	1.152	1.122	cytoplasm	K01408	IDE, ide; insulysin [EC:3.4.24.56]					PF05193	Peptidase M16 inactive domain	O	KOG0959	N-arginine dibasic convertase NRD1 and related Zn2+-dependent endopeptidases, insulinase superfamily
A0A2G3A1L0	USP domain-containing protein OS=Capsicum annuum OX=4072 GN=T459_10233 PE=4 SV=1	T459_10233	1.348	0.0329311	Up	186.3	1.127	1.121	1.198	0.702	0.944	0.911													nucleus									O	KOG1887	Ubiquitin carboxyl-terminal hydrolase
A0A2G2Z3Y2	PMR5N domain-containing protein OS=Capsicum annuum OX=4072 GN=T459_20230 PE=4 SV=1	T459_20230	0.725	0.000251607	Down	49.2	0.846	0.858	0.821	1.161	1.115	1.206													chloroplast							PF14416	PMR5 N terminal Domain
A0A1U8GL93	Transmembrane 9 superfamily member OS=Capsicum annuum OX=4072 GN=T459_13787 PE=3 SV=1	T459_13787	1.307	0.000156102	Up	68.5	1.139	1.111	1.154	0.843	0.871	0.89	1.045	1.02	1.058	0.885	0.903	1.011	0.948	0.909	0.923	1.055	1.066	1.024	plasma membrane	K17085	TM9SF1; transmembrane 9 superfamily member 1			GO:0005618 cell wall; GO:0005622 intracellular; GO:0005623 cell; GO:0005737 cytoplasm; GO:0005768 endosome; GO:0005794 Golgi apparatus; GO:0005802 trans-Golgi network; GO:0009505 plant-type cell wall; GO:0012505 endomembrane system; GO:0016020 membrane; GO:0016021 integral component of membrane; GO:0030312 external encapsulating structure; GO:0031224 intrinsic component of membrane; GO:0031410 cy…				U	KOG1278	Endosomal membrane proteins, EMP70
A0A1U8GTH6	22.0 kDa class IV heat shock protein OS=Capsicum annuum OX=4072 GN=T459_13892 PE=3 SV=1	T459_13892	0.337	3.09491e-05	Down	22.6	0.549	0.509	0.459	1.486	1.5	1.51	1.169	1.124	1.116	0.869	0.899	0.89							vacuolar membrane	K13993	HSP20; HSP20 family protein	map04141 Protein processing in endoplasmic reticulum	GO:0006950 response to stress; GO:0009266 response to temperature stimulus; GO:0009408 response to heat; GO:0009628 response to abiotic stimulus; GO:0050896 response to stimulus;	GO:0005622 intracellular; GO:0005623 cell; GO:0005737 cytoplasm; GO:0005783 endoplasmic reticulum; GO:0012505 endomembrane system; GO:0043226 organelle; GO:0043227 membrane-bounded organelle; GO:0043229 intracellular organelle; GO:0043231 intracellular membrane-bounded organelle;				O	KOG0710	Molecular chaperone (small heat-shock protein Hsp26/Hsp42)
A0A1U8GYD6	Superkiller viralicidic activity 2-like 2 OS=Capsicum annuum OX=4072 GN=T459_14872 PE=4 SV=1	T459_14872	1.312	2.45022e-05	Up	112.3	1.126	1.138	1.135	0.844	0.878	0.869	0.931	0.866	0.934	1.062	1.114	1.102	0.892	0.806	0.889	1.193	1.108	1.116	cytoplasm	K12598	MTR4, SKIV2L2; ATP-dependent RNA helicase DOB1 [EC:3.6.4.13]	map03018 RNA degradation	GO:0000003 reproduction; GO:0000184 nuclear-transcribed mRNA catabolic process, nonsense-mediated decay; GO:0000288 nuclear-transcribed mRNA catabolic process, deadenylation-dependent decay; GO:0000291 nuclear-transcribed mRNA catabolic process, exonucleolytic; GO:0000956 nuclear-transcribed mRNA catabolic process; GO:0003002 regionalization; GO:0003006 developmental process involved in reproduct…	GO:0005622 intracellular; GO:0005623 cell; GO:0005634 nucleus; GO:0005654 nucleoplasm; GO:0005737 cytoplasm; GO:0005829 cytosol; GO:0016604 nuclear body; GO:0016607 nuclear speck; GO:0031974 membrane-enclosed lumen; GO:0031981 nuclear lumen; GO:0032991 protein-containing complex; GO:0043226 organelle; GO:0043227 membrane-bounded organelle; GO:0043229 intracellular organelle; GO:0043231 intracellu…	GO:0003724 RNA helicase activity; GO:0003824 catalytic activity; GO:0004386 helicase activity; GO:0008186 RNA-dependent ATPase activity; GO:0016462 pyrophosphatase activity; GO:0016787 hydrolase activity; GO:0016817 hydrolase activity, acting on acid anhydrides; GO:0016818 hydrolase activity, acting on acid anhydrides, in phosphorus-containing anhydrides; GO:0016887 ATPase activity; GO:0017111 nu…	PF00270; PF13234; PF08148	DEAD/DEAH box helicase; rRNA-processing arch domain; DSHCT (NUC185) domain	A	KOG0948	Nuclear exosomal RNA helicase MTR4, DEAD-box superfamily
A0A1U8F4P4	Isoleucine--tRNA ligase, cytoplasmic OS=Capsicum annuum OX=4072 GN=T459_29088 PE=3 SV=1	T459_29088	1.328	7.58631e-05	Up	126.2	1.162	1.125	1.121	0.834	0.868	0.864	0.918	0.92	0.876	1.085	1.1	1.099	0.845	0.792	0.793	1.206	1.178	1.155	cytoplasm	K01870	IARS, ileS; isoleucyl-tRNA synthetase [EC:6.1.1.5]	map00970 Aminoacyl-tRNA biosynthesis	GO:0006082 organic acid metabolic process; GO:0006139 nucleobase-containing compound metabolic process; GO:0006399 tRNA metabolic process; GO:0006412 translation; GO:0006418 tRNA aminoacylation for protein translation; GO:0006428 isoleucyl-tRNA aminoacylation; GO:0006518 peptide metabolic process; GO:0006520 cellular amino acid metabolic process; GO:0006725 cellular aromatic compound metabolic pr…	GO:0005622 intracellular; GO:0005623 cell; GO:0005737 cytoplasm; GO:0005829 cytosol; GO:0017101 aminoacyl-tRNA synthetase multienzyme complex; GO:0032991 protein-containing complex;	GO:0003824 catalytic activity; GO:0004812 aminoacyl-tRNA ligase activity; GO:0004822 isoleucine-tRNA ligase activity; GO:0005488 binding; GO:0005515 protein binding; GO:0016874 ligase activity; GO:0016875 ligase activity, forming carbon-oxygen bonds; GO:0019899 enzyme binding; GO:0051020 GTPase binding; GO:0140098 catalytic activity, acting on RNA; GO:0140101 catalytic activity, acting on a tRNA;	PF08264	Anticodon-binding domain of tRNA	J	KOG0434	Isoleucyl-tRNA synthetase
A0A2G3A6N4	DEAD-box ATP-dependent RNA helicase 16 OS=Capsicum annuum OX=4072 GN=T459_05019 PE=4 SV=1	T459_05019	1.37	0.0151508	Up	65.6	1.169	1.008	1.293	0.804	0.863	0.865							1.004	0.962	0.919	1.033	1.011	1.079	cytoplasm	K14810	DDX56, DBP9; ATP-dependent RNA helicase DDX56/DBP9 [EC:3.6.4.13]		GO:0006139 nucleobase-containing compound metabolic process; GO:0006364 rRNA processing; GO:0006396 RNA processing; GO:0006725 cellular aromatic compound metabolic process; GO:0006807 nitrogen compound metabolic process; GO:0008152 metabolic process; GO:0009987 cellular process; GO:0010467 gene expression; GO:0010501 RNA secondary structure unwinding; GO:0016070 RNA metabolic process; GO:0016072 …	GO:0005622 intracellular; GO:0005623 cell; GO:0005634 nucleus; GO:0005730 nucleolus; GO:0005737 cytoplasm; GO:0031974 membrane-enclosed lumen; GO:0031981 nuclear lumen; GO:0043226 organelle; GO:0043227 membrane-bounded organelle; GO:0043228 non-membrane-bounded organelle; GO:0043229 intracellular organelle; GO:0043231 intracellular membrane-bounded organelle; GO:0043232 intracellular non-membrane…	GO:0003724 RNA helicase activity; GO:0003824 catalytic activity; GO:0004386 helicase activity; GO:0008186 RNA-dependent ATPase activity; GO:0016462 pyrophosphatase activity; GO:0016787 hydrolase activity; GO:0016817 hydrolase activity, acting on acid anhydrides; GO:0016818 hydrolase activity, acting on acid anhydrides, in phosphorus-containing anhydrides; GO:0016887 ATPase activity; GO:0017111 nu…	PF00270	DEAD/DEAH box helicase	A	KOG0346	RNA helicase
A0A1U8GV46	Putative GDP-fucose O-fucosyltransferase-like(predicted) OS=Capsicum annuum OX=4072 GN=T459_16938 PE=4 SV=1	T459_16938	1.378	0.00500194	Up	61.6	1.067	1.17	1.241	0.781	0.87	0.873	0.948	0.979	1.028	1.072	0.986	0.994							chloroplast					GO:0005622 intracellular; GO:0005623 cell; GO:0005737 cytoplasm; GO:0005768 endosome; GO:0005794 Golgi apparatus; GO:0005802 trans-Golgi network; GO:0012505 endomembrane system; GO:0031410 cytoplasmic vesicle; GO:0031982 vesicle; GO:0031984 organelle subcompartment; GO:0043226 organelle; GO:0043227 membrane-bounded organelle; GO:0043229 intracellular organelle; GO:0043231 intracellular membrane-b…
A0A1U8HGC8	Type III polyketide synthase A OS=Capsicum annuum OX=4072 GN=T459_32090 PE=3 SV=1	T459_32090	0.588	1.20185e-07	Down	43	0.743	0.738	0.744	1.277	1.256	1.254	1.207	1.196	1.133	0.861	0.84	0.847							nucleus				GO:0006725 cellular aromatic compound metabolic process; GO:0007275 multicellular organism development; GO:0008152 metabolic process; GO:0009058 biosynthetic process; GO:0009555 pollen development; GO:0009653 anatomical structure morphogenesis; GO:0009987 cellular process; GO:0010208 pollen wall assembly; GO:0010584 pollen exine formation; GO:0010927 cellular component assembly involved in morpho…	GO:0005622 intracellular; GO:0005623 cell; GO:0005737 cytoplasm; GO:0005783 endoplasmic reticulum; GO:0012505 endomembrane system; GO:0043226 organelle; GO:0043227 membrane-bounded organelle; GO:0043229 intracellular organelle; GO:0043231 intracellular membrane-bounded organelle;	GO:0003824 catalytic activity; GO:0016740 transferase activity; GO:0016746 transferase activity, transferring acyl groups; GO:0016747 transferase activity, transferring acyl groups other than amino-acyl groups; GO:0090439 tetraketide alpha-pyrone synthase activity;	PF00195; PF02797	Chalcone and stilbene synthases, N-terminal domain; Chalcone and stilbene synthases, C-terminal domain
A0A1U8H7U0	Chitinase 4 OS=Capsicum annuum OX=4072 GN=T459_16612 PE=4 SV=1	T459_16612	0.651	0.000445004	Down	30.8	0.756	0.776	0.806	1.267	1.204	1.12	0.996	0.96	1.046	1.016	0.944	1.014							extracellular	K01183	E3.2.1.14; chitinase [EC:3.2.1.14]	map00520 Amino sugar and nucleotide sugar metabolism; map01100 Metabolic pathways	GO:0002376 immune system process; GO:0006950 response to stress; GO:0006952 defense response; GO:0006955 immune response; GO:0007275 multicellular organism development; GO:0007568 aging; GO:0009605 response to external stimulus; GO:0009607 response to biotic stimulus; GO:0009615 response to virus; GO:0009620 response to fungus; GO:0009627 systemic acquired resistance; GO:0009635 response to herbi…	GO:0005576 extracellular region; GO:0005618 cell wall; GO:0005623 cell; GO:0005886 plasma membrane; GO:0009505 plant-type cell wall; GO:0016020 membrane; GO:0030312 external encapsulating structure; GO:0048046 apoplast; GO:0071944 cell periphery;		PF00187; PF00182	Chitin recognition protein; Chitinase class I	S	KOG4742	Predicted chitinase
A0A2G2Z633	Proteasome activator subunit 4 OS=Capsicum annuum OX=4072 GN=T459_20975 PE=4 SV=1	T459_20975	1.358	0.000120223	Up	95.6	1.127	1.186	1.13	0.83	0.865	0.84	1.009	0.939	0.933	1.051	1.047	0.995	0.872	0.917	0.908	1.12	1.122	1.102	chloroplast	K06699	PSME4; proteasome activator subunit 4	map03050 Proteasome	GO:0006508 proteolysis; GO:0006807 nitrogen compound metabolic process; GO:0008152 metabolic process; GO:0009056 catabolic process; GO:0009057 macromolecule catabolic process; GO:0009893 positive regulation of metabolic process; GO:0009987 cellular process; GO:0010498 proteasomal protein catabolic process; GO:0010499 proteasomal ubiquitin-independent protein catabolic process; GO:0010604 positive…	GO:0000502 proteasome complex; GO:0005622 intracellular; GO:0005623 cell; GO:0005634 nucleus; GO:0005737 cytoplasm; GO:0005829 cytosol; GO:0005839 proteasome core complex; GO:0032991 protein-containing complex; GO:0043226 organelle; GO:0043227 membrane-bounded organelle; GO:0043229 intracellular organelle; GO:0043231 intracellular membrane-bounded organelle; GO:1902494 catalytic complex; GO:19053…	GO:0005488 binding; GO:0005515 protein binding; GO:0008047 enzyme activator activity; GO:0016504 peptidase activator activity; GO:0030234 enzyme regulator activity; GO:0042393 histone binding; GO:0044877 protein-containing complex binding; GO:0061134 peptidase regulator activity; GO:0070577 lysine-acetylated histone binding; GO:0070628 proteasome binding; GO:0098772 molecular function regulator; …			S	KOG1851	Uncharacterized conserved protein
A0A2G2YHB0	protein RETICULATA-RELATED 1, chloroplastic-like(predicted) OS=Capsicum annuum OX=4072 GN=T459_28621 PE=4 SV=1	T459_28621	1.303	0.000305553	Up	29.1	1.11	1.13	1.15	0.833	0.889	0.88	0.994	1.01	1.04	0.972	1.04	0.979	1.033	1.034	0.916	1.01	0.97	1.047	chloroplast					GO:0005622 intracellular; GO:0005623 cell; GO:0005737 cytoplasm; GO:0005739 mitochondrion; GO:0009507 chloroplast; GO:0009526 plastid envelope; GO:0009528 plastid inner membrane; GO:0009536 plastid; GO:0009706 chloroplast inner membrane; GO:0009941 chloroplast envelope; GO:0016020 membrane; GO:0019866 organelle inner membrane; GO:0031090 organelle membrane; GO:0031967 organelle envelope; GO:00319…
A0A2G2ZG87	60S ribosomal protein L7a OS=Capsicum annuum OX=4072 GN=T459_14032 PE=4 SV=1	T459_14032	1.458	0.000156608	Up	30.9	1.23	1.209	1.147	0.847	0.799	0.814	1.035	1.046	0.981	1.007	0.978	1.021	0.984	0.931	0.989	1.063	1.033	1.022	cytoplasm	K02936	RP-L7Ae, RPL7A; large subunit ribosomal protein L7Ae	map03010 Ribosome				PF01248	Ribosomal protein L7Ae/L30e/S12e/Gadd45 family	J	KOG3166	60S ribosomal protein L7A
A0A2G2ZKU7	ATP-sulfurylase domain-containing protein OS=Capsicum annuum OX=4072 GN=T459_11063 PE=4 SV=1	T459_11063	0.712	0.00235879	Down	23	0.811	0.914	0.774	1.175	1.177	1.157	0.998	0.925	0.966	1.08	1.054	0.983	0.928	0.86	1	1.121	0.976	1.119	cytoplasm	K13811	PAPSS; 3'-phosphoadenosine 5'-phosphosulfate synthase [EC:2.7.7.4 2.7.1.25]	map00230 Purine metabolism; map00261 Monobactam biosynthesis; map00450 Selenocompound metabolism; map00920 Sulfur metabolism; map01100 Metabolic pathways	GO:0000103 sulfate assimilation; GO:0001887 selenium compound metabolic process; GO:0006790 sulfur compound metabolic process; GO:0006793 phosphorus metabolic process; GO:0006796 phosphate-containing compound metabolic process; GO:0006950 response to stress; GO:0007154 cell communication; GO:0008152 metabolic process; GO:0009267 cellular response to starvation; GO:0009605 response to external sti…	GO:0005622 intracellular; GO:0005623 cell; GO:0005737 cytoplasm; GO:0005739 mitochondrion; GO:0005886 plasma membrane; GO:0009507 chloroplast; GO:0009532 plastid stroma; GO:0009536 plastid; GO:0009570 chloroplast stroma; GO:0016020 membrane; GO:0043226 organelle; GO:0043227 membrane-bounded organelle; GO:0043229 intracellular organelle; GO:0043231 intracellular membrane-bounded organelle; GO:0071…	GO:0003824 catalytic activity; GO:0004020 adenylylsulfate kinase activity; GO:0004779 sulfate adenylyltransferase activity; GO:0004781 sulfate adenylyltransferase (ATP) activity; GO:0016301 kinase activity; GO:0016740 transferase activity; GO:0016772 transferase activity, transferring phosphorus-containing groups; GO:0016773 phosphotransferase activity, alcohol group as acceptor; GO:0016779 nucle…	PF01747	ATP-sulfurylase	P	KOG0636	ATP sulfurylase (sulfate adenylyltransferase)
A0A2G2ZVA5	pentatricopeptide repeat-containing protein At1g71490-like(predicted) OS=Capsicum annuum OX=4072 GN=T459_07997 PE=4 SV=1	T459_07997	1.887	3.12295e-06	Up	101	1.298	1.309	1.317	0.688	0.715	0.676	1.181	1.18	1.105	0.845	0.906	0.796	1.035	0.994	1.015	0.95	0.988	1.026	cytoplasm				GO:0006139 nucleobase-containing compound metabolic process; GO:0006725 cellular aromatic compound metabolic process; GO:0006807 nitrogen compound metabolic process; GO:0008152 metabolic process; GO:0009451 RNA modification; GO:0009987 cellular process; GO:0016070 RNA metabolic process; GO:0034641 cellular nitrogen compound metabolic process; GO:0043170 macromolecule metabolic process; GO:0043412…	GO:0005622 intracellular; GO:0005623 cell; GO:0043226 organelle; GO:0043227 membrane-bounded organelle; GO:0043229 intracellular organelle; GO:0043231 intracellular membrane-bounded organelle;	GO:0003676 nucleic acid binding; GO:0003723 RNA binding; GO:0003824 catalytic activity; GO:0004518 nuclease activity; GO:0004519 endonuclease activity; GO:0005488 binding; GO:0016787 hydrolase activity; GO:0016788 hydrolase activity, acting on ester bonds; GO:0097159 organic cyclic compound binding; GO:1901363 heterocyclic compound binding;			S	KOG4197	FOG: PPR repeat
A0A2G2YBJ3	Putative serine/threonine-protein kinase OS=Capsicum annuum OX=4072 GN=T459_31552 PE=4 SV=1	T459_31552	1.32	0.00665187	Up	54.2	1.22	1.084	1.113	0.805	0.925	0.858	1.01	0.997	0.908	1.08	1.115	1.058	0.9	0.934	0.926	1.068	1.117	1.054	cytoplasm	K14500	BSK; BR-signaling kinase [EC:2.7.11.1]	map04075 Plant hormone signal transduction	GO:0006464 cellular protein modification process; GO:0006468 protein phosphorylation; GO:0006793 phosphorus metabolic process; GO:0006796 phosphate-containing compound metabolic process; GO:0006807 nitrogen compound metabolic process; GO:0007154 cell communication; GO:0007165 signal transduction; GO:0007166 cell surface receptor signaling pathway; GO:0007167 enzyme linked receptor protein signali…	GO:0005623 cell; GO:0005886 plasma membrane; GO:0005911 cell-cell junction; GO:0009506 plasmodesma; GO:0016020 membrane; GO:0030054 cell junction; GO:0055044 symplast; GO:0071944 cell periphery;	GO:0003824 catalytic activity; GO:0004672 protein kinase activity; GO:0004674 protein serine/threonine kinase activity; GO:0004675 transmembrane receptor protein serine/threonine kinase activity; GO:0004888 transmembrane signaling receptor activity; GO:0016301 kinase activity; GO:0016740 transferase activity; GO:0016772 transferase activity, transferring phosphorus-containing groups; GO:0016773 p…	PF07714	Protein tyrosine kinase
A0A2G2ZAL7	Non-specific lipid-transfer protein OS=Capsicum annuum OX=4072 GN=T459_16967 PE=3 SV=1	T459_16967	0.673	7.34468e-05	Down	15.5	0.791	0.843	0.783	1.194	1.208	1.189	0.927	0.917	0.914	1.172	1.038	1.052	1.043	1.076	0.951	0.979	1.01	0.93	extracellular				GO:0006810 transport; GO:0006869 lipid transport; GO:0010876 lipid localization; GO:0033036 macromolecule localization; GO:0051179 localization; GO:0051234 establishment of localization; GO:0071702 organic substance transport;	GO:0016020 membrane;
A0A2G2YUZ3	NB-ARC domain-containing protein OS=Capsicum annuum OX=4072 GN=T459_24341 PE=3 SV=1	T459_24341	1.575	0.000117201	Up	99.5	1.289	1.221	1.163	0.771	0.787	0.774	0.782	1.051	0.956	1.093	1.109	1.012	0.853	0.707	0.702	1.264	1.336	1.139	plasma membrane	K13457	RPM1, RPS3; disease resistance protein RPM1	map04626 Plant-pathogen interaction				PF00931	NB-ARC domain	T	KOG4658	Apoptotic ATPase
A0A2G2YY11	26S proteasome non-ATPase regulatory subunit 6 OS=Capsicum annuum OX=4072 GN=T459_21927 PE=4 SV=1	T459_21927	1.358	0.000402542	Up	38.1	1.159	1.183	1.147	0.891	0.865	0.814	0.93	0.969	0.916	1.057	1.083	1.037	0.95	0.788	0.862	1.098	1.203	1.108	chloroplast	K03037	PSMD6, RPN7; 26S proteasome regulatory subunit N7	map03050 Proteasome	GO:0006508 proteolysis; GO:0006511 ubiquitin-dependent protein catabolic process; GO:0006807 nitrogen compound metabolic process; GO:0008152 metabolic process; GO:0009056 catabolic process; GO:0009057 macromolecule catabolic process; GO:0009987 cellular process; GO:0010498 proteasomal protein catabolic process; GO:0019538 protein metabolic process; GO:0019941 modification-dependent protein catabo…	GO:0000502 proteasome complex; GO:0005622 intracellular; GO:0005623 cell; GO:0005634 nucleus; GO:0005737 cytoplasm; GO:0005829 cytosol; GO:0005886 plasma membrane; GO:0016020 membrane; GO:0032991 protein-containing complex; GO:0043226 organelle; GO:0043227 membrane-bounded organelle; GO:0043229 intracellular organelle; GO:0043231 intracellular membrane-bounded organelle; GO:0071944 cell periphery…		PF01399	PCI domain	O	KOG0687	26S proteasome regulatory complex, subunit RPN7/PSMD6
A0A2G2YVI7	Elongator complex protein 6 OS=Capsicum annuum OX=4072 GN=T459_24565 PE=4 SV=1	T459_24565	1.301	0.0030738	Up	28.6	1.074	1.208	1.113	0.897	0.834	0.879													cytoplasm				GO:0006950 response to stress; GO:0006979 response to oxidative stress; GO:0008284 positive regulation of cell population proliferation; GO:0009892 negative regulation of metabolic process; GO:0019222 regulation of metabolic process; GO:0031537 regulation of anthocyanin metabolic process; GO:0031538 negative regulation of anthocyanin metabolic process; GO:0042127 regulation of cell population pro…	GO:0005622 intracellular; GO:0005623 cell; GO:0032991 protein-containing complex; GO:0033588 Elongator holoenzyme complex;				S	KOG4723	Uncharacterized conserved protein
A0A1U8GJL1	Putative inactive receptor kinase(predicted) OS=Capsicum annuum OX=4072 GN=T459_32951 PE=4 SV=1	T459_32951	1.663	8.01267e-05	Up	42.5	1.204	1.31	1.235	0.778	0.744	0.732													chloroplast
A0A1U8G055	Putative ubiquitin conjugation factor E4 OS=Capsicum annuum OX=4072 GN=T459_07032 PE=4 SV=1	T459_07032	1.345	0.000965533	Up	117.8	1.212	1.128	1.104	0.848	0.828	0.884	0.919	0.964	0.925	1.112	1.041	1.076	0.906	0.858	0.907	1.076	1.054	1.194	chloroplast	K10597	UBE4B, UFD2; ubiquitin conjugation factor E4 B [EC:2.3.2.27]	map04120 Ubiquitin mediated proteolysis; map04141 Protein processing in endoplasmic reticulum	GO:0000209 protein polyubiquitination; GO:0006464 cellular protein modification process; GO:0006508 proteolysis; GO:0006511 ubiquitin-dependent protein catabolic process; GO:0006807 nitrogen compound metabolic process; GO:0006950 response to stress; GO:0008152 metabolic process; GO:0009056 catabolic process; GO:0009057 macromolecule catabolic process; GO:0009987 cellular process; GO:0010033 respo…	GO:0005622 intracellular; GO:0005623 cell; GO:0005634 nucleus; GO:0005737 cytoplasm; GO:0005829 cytosol; GO:0043226 organelle; GO:0043227 membrane-bounded organelle; GO:0043229 intracellular organelle; GO:0043231 intracellular membrane-bounded organelle;	GO:0003824 catalytic activity; GO:0004842 ubiquitin-protein transferase activity; GO:0016740 transferase activity; GO:0019787 ubiquitin-like protein transferase activity; GO:0034450 ubiquitin-ubiquitin ligase activity; GO:0061630 ubiquitin protein ligase activity; GO:0061659 ubiquitin-like protein ligase activity; GO:0140096 catalytic activity, acting on a protein;	PF04564	U-box domain	O	KOG2042	Ubiquitin fusion degradation protein-2
A0A1U8E7E2	BURP domain-containing protein OS=Capsicum annuum OX=4072 GN=T459_31811 PE=4 SV=1	T459_31811	0.653	2.49752e-05	Down	45.2	0.788	0.777	0.808	1.207	1.181	1.246	1.002	1.057	1.104	0.927	0.971	0.947	1.218	1.232	1.307	0.805	0.778	0.78	vacuolar membrane
A0A1U8GXC1	delta(1)-pyrroline-2-carboxylate reductase(predicted) OS=Capsicum annuum OX=4072 GN=T459_16584 PE=4 SV=1	T459_16584	0.739	0.000315146	Down	36	0.812	0.874	0.866	1.172	1.158	1.125	0.996	0.96	0.972	1.106	0.958	1.014	0.779	0.749	0.753	1.281	1.222	1.216	chloroplast				GO:0002682 regulation of immune system process; GO:0002684 positive regulation of immune system process; GO:0002831 regulation of response to biotic stimulus; GO:0002833 positive regulation of response to biotic stimulus; GO:0008152 metabolic process; GO:0010112 regulation of systemic acquired resistance; GO:0031347 regulation of defense response; GO:0031349 positive regulation of defense respons…	GO:0005622 intracellular; GO:0005623 cell; GO:0005737 cytoplasm; GO:0009507 chloroplast; GO:0009536 plastid; GO:0043226 organelle; GO:0043227 membrane-bounded organelle; GO:0043229 intracellular organelle; GO:0043231 intracellular membrane-bounded organelle;	GO:0003824 catalytic activity; GO:0016491 oxidoreductase activity; GO:0016638 oxidoreductase activity, acting on the CH-NH2 group of donors; GO:0016639 oxidoreductase activity, acting on the CH-NH2 group of donors, NAD or NADP as acceptor;			E	KOG3007	Mu-crystallin
A0A2G2YGB8	glutelin type-A 1-like(predicted) OS=Capsicum annuum OX=4072 GN=T459_28244 PE=4 SV=1	T459_28244	0.699	2.32291e-06	Down	38.1	0.826	0.812	0.807	1.176	1.154	1.17	1.078	1.049	1.06	0.904	0.964	0.922	0.716	0.732	0.704	1.247	1.284	1.31	cytoplasm							PF00190	Cupin
A0A2G3ANA5	Cullin-4A OS=Capsicum annuum OX=4072 GN=T459_03603 PE=3 SV=1	T459_03603	1.395	0.00533333	Up	85.3	1.049	1.275	1.172	0.802	0.848	0.856													chloroplast	K10609	CUL4; cullin 4	map03420 Nucleotide excision repair; map04120 Ubiquitin mediated proteolysis				PF10557	Cullin protein neddylation domain	D	KOG2167	Cullins
A0A1U8EFD5	Tyrosine aminotransferase OS=Capsicum annuum OX=4072 GN=T459_24718 PE=3 SV=1	T459_24718	1.378	0.00320868	Up	47.5	1.125	1.099	1.255	0.887	0.837	0.8							1.085	1.117	1.001	0.996	0.941	0.871	chloroplast	K00815	TAT; tyrosine aminotransferase [EC:2.6.1.5]	map00130 Ubiquinone and other terpenoid-quinone biosynthesis; map00270 Cysteine and methionine metabolism; map00350 Tyrosine metabolism; map00360 Phenylalanine metabolism; map00400 Phenylalanine, tyrosine and tryptophan biosynthesis; map00950 Isoquinoline alkaloid biosynthesis; map00960 Tropane, piperidine and pyridine alkaloid biosynthesis; map01100 Metabolic pathways; map01110 Biosynthesis of s…	GO:0006082 organic acid metabolic process; GO:0006520 cellular amino acid metabolic process; GO:0006570 tyrosine metabolic process; GO:0006572 tyrosine catabolic process; GO:0006725 cellular aromatic compound metabolic process; GO:0006766 vitamin metabolic process; GO:0006775 fat-soluble vitamin metabolic process; GO:0006807 nitrogen compound metabolic process; GO:0008152 metabolic process; GO:00…	GO:0005622 intracellular; GO:0005623 cell; GO:0005737 cytoplasm; GO:0005829 cytosol;	GO:0003824 catalytic activity; GO:0004838 L-tyrosine:2-oxoglutarate aminotransferase activity; GO:0008483 transaminase activity; GO:0016740 transferase activity; GO:0016769 transferase activity, transferring nitrogenous groups; GO:0070547 L-tyrosine aminotransferase activity;	PF00155	Aminotransferase class I and II	E	KOG0259	Tyrosine aminotransferase
A0A2G2Y3H2	GATA transcription factor 28 OS=Capsicum annuum OX=4072 GN=T459_31948 PE=4 SV=1	T459_31948	0.766	0.0015665	Down	26.9	0.843	0.876	0.886	1.127	1.076	1.199	1.03	0.921	0.893	1.04	0.998	1.123							nucleus				GO:0006139 nucleobase-containing compound metabolic process; GO:0006351 transcription, DNA-templated; GO:0006355 regulation of transcription, DNA-templated; GO:0006357 regulation of transcription by RNA polymerase II; GO:0006366 transcription by RNA polymerase II; GO:0006725 cellular aromatic compound metabolic process; GO:0006807 nitrogen compound metabolic process; GO:0008152 metabolic process;…	GO:0005622 intracellular; GO:0005623 cell; GO:0005634 nucleus; GO:0005667 transcription regulator complex; GO:0032991 protein-containing complex; GO:0043226 organelle; GO:0043227 membrane-bounded organelle; GO:0043229 intracellular organelle; GO:0043231 intracellular membrane-bounded organelle;	GO:0000976 transcription regulatory region sequence-specific DNA binding; GO:0000977 RNA polymerase II transcription regulatory region sequence-specific DNA binding; GO:0000981 DNA-binding transcription factor activity, RNA polymerase II-specific; GO:0001067 regulatory region nucleic acid binding; GO:0001085 RNA polymerase II transcription factor binding; GO:0001228 DNA-binding transcription acti…	PF06200; PF00320	tify domain; GATA zinc finger	K	KOG1601	GATA-4/5/6 transcription factors
A0A2G2ZXS4	Histone H1 OS=Capsicum annuum OX=4072 GN=T459_08872 PE=4 SV=1	T459_08872	1.338	0.0071756	Up	19.6	1.22	1.039	1.174	0.824	0.834	0.908	1.091	1.08	1.052	0.924	0.916	0.945	1.124	1.147	1.111	0.853	0.875	0.894	nucleus	K11275	H1_5; histone H1/5			GO:0005622 intracellular; GO:0005623 cell; GO:0005634 nucleus; GO:0005694 chromosome; GO:0005730 nucleolus; GO:0005737 cytoplasm; GO:0005739 mitochondrion; GO:0031974 membrane-enclosed lumen; GO:0031981 nuclear lumen; GO:0043226 organelle; GO:0043227 membrane-bounded organelle; GO:0043228 non-membrane-bounded organelle; GO:0043229 intracellular organelle; GO:0043231 intracellular membrane-bounded…		PF00538	linker histone H1 and H5 family
A0A2G2Z8K2	BUB1 N-terminal domain-containing protein OS=Capsicum annuum OX=4072 GN=T459_16378 PE=4 SV=1	T459_16378	1.781	0.000778642	Up	64.9	1.248	1.225	1.371	0.646	0.753	0.759													nucleus							PF08311	Mad3/BUB1 homology region 1	D	KOG1166	Mitotic checkpoint serine/threonine protein kinase
A0A2G2Y3M0	Abhydrolase_3 domain-containing protein OS=Capsicum annuum OX=4072 GN=T459_31696 PE=4 SV=1	T459_31696	0.661	1.35111e-05	Down	32.3	0.824	0.791	0.784	1.214	1.217	1.198	1.102	1.03	1.066	0.925	0.917	0.949	0.823	0.863	0.829	1.192	1.141	1.155	cytoskeleton							PF07859	alpha/beta hydrolase fold	V	KOG1515	Arylacetamide deacetylase
A0A1U8GXD8	Casein kinase I isoform delta OS=Capsicum annuum OX=4072 GN=T459_14740 PE=3 SV=1	T459_14740	1.483	0.0119043	Up	53.1	1.16	1.231	1.195	0.866	0.884	0.668	1.04	1.099	1.096	0.848	0.925	1	0.946	1.248	1.089	0.915	0.938	0.875	nucleus	K02218	CSNK1, CKI; casein kinase 1 [EC:2.7.11.1]		GO:0006464 cellular protein modification process; GO:0006468 protein phosphorylation; GO:0006793 phosphorus metabolic process; GO:0006796 phosphate-containing compound metabolic process; GO:0006807 nitrogen compound metabolic process; GO:0006810 transport; GO:0006897 endocytosis; GO:0008152 metabolic process; GO:0008360 regulation of cell shape; GO:0009987 cellular process; GO:0016192 vesicle-med…	GO:0005622 intracellular; GO:0005623 cell; GO:0005634 nucleus; GO:0005737 cytoplasm; GO:0005911 cell-cell junction; GO:0009506 plasmodesma; GO:0030054 cell junction; GO:0043226 organelle; GO:0043227 membrane-bounded organelle; GO:0043229 intracellular organelle; GO:0043231 intracellular membrane-bounded organelle; GO:0055044 symplast;	GO:0003824 catalytic activity; GO:0004672 protein kinase activity; GO:0004674 protein serine/threonine kinase activity; GO:0016301 kinase activity; GO:0016740 transferase activity; GO:0016772 transferase activity, transferring phosphorus-containing groups; GO:0016773 phosphotransferase activity, alcohol group as acceptor; GO:0140096 catalytic activity, acting on a protein;	PF00069	Protein kinase domain	T	KOG1164	Casein kinase (serine/threonine/tyrosine protein kinase)
A0A1U8FF28	40S ribosomal protein S13 OS=Capsicum annuum OX=4072 GN=T459_25380 PE=3 SV=1	T459_25380	1.319	0.000984198	Up	15.9	1.087	1.159	1.151	0.884	0.875	0.817	1.067	1.061	0.978	1.008	0.92	1.006	1.026	1.059	1.067	0.952	0.97	0.936	nucleus	K02953	RP-S13e, RPS13; small subunit ribosomal protein S13e	map03010 Ribosome	GO:0006412 translation; GO:0006518 peptide metabolic process; GO:0006807 nitrogen compound metabolic process; GO:0008152 metabolic process; GO:0009058 biosynthetic process; GO:0009059 macromolecule biosynthetic process; GO:0009987 cellular process; GO:0010467 gene expression; GO:0019538 protein metabolic process; GO:0034641 cellular nitrogen compound metabolic process; GO:0034645 cellular macromo…	GO:0005622 intracellular; GO:0005623 cell; GO:0005634 nucleus; GO:0005730 nucleolus; GO:0005737 cytoplasm; GO:0005829 cytosol; GO:0005840 ribosome; GO:0015935 small ribosomal subunit; GO:0022626 cytosolic ribosome; GO:0022627 cytosolic small ribosomal subunit; GO:0031974 membrane-enclosed lumen; GO:0031981 nuclear lumen; GO:0032991 protein-containing complex; GO:0043226 organelle; GO:0043227 memb…	GO:0003676 nucleic acid binding; GO:0003723 RNA binding; GO:0003735 structural constituent of ribosome; GO:0005198 structural molecule activity; GO:0005488 binding; GO:0019843 rRNA binding; GO:0070181 small ribosomal subunit rRNA binding; GO:0097159 organic cyclic compound binding; GO:1901363 heterocyclic compound binding;	PF08069; PF00312	Ribosomal S13/S15 N-terminal domain; Ribosomal protein S15	J	KOG0400	40S ribosomal protein S13
A0A2G2XYT2	Pept_C1 domain-containing protein OS=Capsicum annuum OX=4072 GN=T459_33492 PE=3 SV=1	T459_33492	0.727	1.20556e-05	Down	36	0.849	0.839	0.842	1.186	1.144	1.148	0.925	0.855	0.906	1.067	1.189	1.045	0.91	0.888	0.906	1.121	1.081	1.099	extracellular	K01363	CTSB; cathepsin B [EC:3.4.22.1]		GO:0006508 proteolysis; GO:0006807 nitrogen compound metabolic process; GO:0008152 metabolic process; GO:0009056 catabolic process; GO:0009057 macromolecule catabolic process; GO:0009987 cellular process; GO:0019538 protein metabolic process; GO:0030163 protein catabolic process; GO:0043170 macromolecule metabolic process; GO:0044237 cellular metabolic process; GO:0044238 primary metabolic proces…	GO:0000323 lytic vacuole; GO:0005576 extracellular region; GO:0005615 extracellular space; GO:0005622 intracellular; GO:0005623 cell; GO:0005737 cytoplasm; GO:0005764 lysosome; GO:0005773 vacuole; GO:0005829 cytosol; GO:0043226 organelle; GO:0043227 membrane-bounded organelle; GO:0043229 intracellular organelle; GO:0043231 intracellular membrane-bounded organelle;	GO:0003824 catalytic activity; GO:0004175 endopeptidase activity; GO:0004197 cysteine-type endopeptidase activity; GO:0008233 peptidase activity; GO:0008234 cysteine-type peptidase activity; GO:0016787 hydrolase activity; GO:0070011 peptidase activity, acting on L-amino acid peptides; GO:0140096 catalytic activity, acting on a protein;	PF00112	Papain family cysteine protease	O	KOG1543	Cysteine proteinase Cathepsin L
A0A1U8ELG2	BTB/POZ domain-containing protein OS=Capsicum annuum OX=4072 GN=T459_27845 PE=3 SV=1	T459_27845	1.358	0.00245033	Up	70.2	1.145	1.16	1.153	0.794	0.924	0.828													nucleus					GO:0005623 cell; GO:0005886 plasma membrane; GO:0016020 membrane; GO:0071944 cell periphery;
A0A1U8G4E4	Protein NRT1/ PTR FAMILY 2.9 OS=Capsicum annuum OX=4072 GN=T459_10228 PE=4 SV=1	T459_10228	0.718	0.0409572	Down	67.5	0.93	0.694	0.887	1.283	1.191	1.023													plasma membrane				GO:0006810 transport; GO:0006811 ion transport; GO:0006812 cation transport; GO:0006820 anion transport; GO:0009628 response to abiotic stimulus; GO:0010232 vascular transport; GO:0010233 phloem transport; GO:0015672 monovalent inorganic cation transport; GO:0015698 inorganic anion transport; GO:0015706 nitrate transport; GO:0015711 organic anion transport; GO:0032501 multicellular organismal pro…	GO:0005622 intracellular; GO:0005623 cell; GO:0005737 cytoplasm; GO:0005794 Golgi apparatus; GO:0005886 plasma membrane; GO:0005911 cell-cell junction; GO:0009506 plasmodesma; GO:0012505 endomembrane system; GO:0016020 membrane; GO:0030054 cell junction; GO:0043226 organelle; GO:0043227 membrane-bounded organelle; GO:0043229 intracellular organelle; GO:0043231 intracellular membrane-bounded organ…	GO:0005215 transporter activity; GO:0008324 cation transmembrane transporter activity; GO:0008509 anion transmembrane transporter activity; GO:0008514 organic anion transmembrane transporter activity; GO:0015075 ion transmembrane transporter activity; GO:0015077 monovalent inorganic cation transmembrane transporter activity; GO:0015078 proton transmembrane transporter activity; GO:0015103 inorgan…			E	KOG1237	H+/oligopeptide symporter
A0A1U8F1L0	glutelin type-A 3-like(predicted) OS=Capsicum annuum OX=4072 GN=T459_28243 PE=4 SV=1	T459_28243	0.603	0.00845368	Down	38.1	0.799	0.608	0.852	1.185	1.271	1.291	1.055	1.096	1.09	0.95	0.929	0.933	0.768	0.77	0.76	1.229	1.214	1.26	cytoplasm							PF00190	Cupin
A0A1U8H0F4	26.5 kDa heat shock protein, mitochondrial OS=Capsicum annuum OX=4072 GN=T459_01627 PE=3 SV=1	T459_01627	0.734	0.0107272	Down	25.9	0.835	0.891	0.818	1.089	1.072	1.303	0.844	0.984	1.206	1.081	0.901	0.989							chloroplast	K13993	HSP20; HSP20 family protein	map04141 Protein processing in endoplasmic reticulum	GO:0000302 response to reactive oxygen species; GO:0006950 response to stress; GO:0006979 response to oxidative stress; GO:0009266 response to temperature stimulus; GO:0009314 response to radiation; GO:0009408 response to heat; GO:0009416 response to light stimulus; GO:0009628 response to abiotic stimulus; GO:0009636 response to toxic substance; GO:0009642 response to light intensity; GO:0009644 …					O	KOG0710	Molecular chaperone (small heat-shock protein Hsp26/Hsp42)
A0A1U8FUA5	Vesicle-associated protein 4-2 OS=Capsicum annuum OX=4072 GN=T459_05798 PE=4 SV=1	T459_05798	0.764	0.00653013	Down	30.5	0.924	0.825	0.853	1.053	1.204	1.147							1.04	1.165	0.956	0.892	0.974	0.984	nucleus							PF00635	MSP (Major sperm protein) domain	U	KOG0439	VAMP-associated protein involved in inositol metabolism
A0A1U8FRY3	aspartic protease inhibitor 10-like(predicted) OS=Capsicum annuum OX=4072 GN=T459_04863 PE=4 SV=1	T459_04863	1.332	1.09106e-05	Up	27.4	1.168	1.131	1.135	0.86	0.863	0.855	1.207	1.236	1.241	0.74	0.765	0.772	1.438	1.4	1.425	0.576	0.6	0.563	extracellular							PF00197	Trypsin and protease inhibitor
A0A2G3AFZ8	Cir_N domain-containing protein OS=Capsicum annuum OX=4072 GN=T459_01044 PE=4 SV=1	T459_01044	0.656	0.00216319	Down	84.6	0.83	0.838	0.713	1.14	1.258	1.23													nucleus	K06066	CIR; CBF1 interacting corepressor					PF10197	N-terminal domain of CBF1 interacting co-repressor CIR	K	KOG3794	CBF1-interacting corepressor CIR and related proteins
A0A2G3AK25	AAI domain-containing protein OS=Capsicum annuum OX=4072 GN=T459_02478 PE=4 SV=1	T459_02478	0.756	3.3119e-05	Down	14.9	0.866	0.838	0.875	1.133	1.146	1.132													chloroplast
A0A2G3APJ2	Protein phosphatase 2C 29 OS=Capsicum annuum OX=4072 GN=T459_04031 PE=4 SV=1	T459_04031	1.36	0.00585389	Up	64.6	1.224	1.096	1.14	0.771	0.87	0.903													chloroplast				GO:0000902 cell morphogenesis; GO:0006355 regulation of transcription, DNA-templated; GO:0009653 anatomical structure morphogenesis; GO:0009826 unidimensional cell growth; GO:0009888 tissue development; GO:0009889 regulation of biosynthetic process; GO:0009933 meristem structural organization; GO:0009987 cellular process; GO:0010073 meristem maintenance; GO:0010074 maintenance of meristem identit…	GO:0005623 cell; GO:0005886 plasma membrane; GO:0016020 membrane; GO:0071944 cell periphery;	GO:0005488 binding; GO:0005543 phospholipid binding; GO:0008289 lipid binding; GO:0043167 ion binding; GO:0043168 anion binding;			T	KOG0700	Protein phosphatase 2C/pyruvate dehydrogenase (lipoamide) phosphatase
A0A1U8HCV4	Putative ovule protein(predicted) OS=Capsicum annuum OX=4072 GN=T459_20637 PE=4 SV=1	T459_20637	1.421	0.00277753	Up	27.1	1.223	1.137	1.164	0.752	0.838	0.89							0.944	1.031	0.871	1.136	1.013	1.013	chloroplast
A0A1U8HAG8	Histone H1 OS=Capsicum annuum OX=4072 GN=T459_18487 PE=3 SV=1	T459_18487	1.337	7.34602e-05	Up	28.6	1.138	1.175	1.122	0.871	0.859	0.84	1.152	1.068	1.038	0.891	0.926	0.934	1.123	1.148	1.046	0.916	0.873	0.907	nucleus	K11275	H1_5; histone H1/5			GO:0005622 intracellular; GO:0005623 cell; GO:0005634 nucleus; GO:0005694 chromosome; GO:0005730 nucleolus; GO:0005737 cytoplasm; GO:0005739 mitochondrion; GO:0031974 membrane-enclosed lumen; GO:0031981 nuclear lumen; GO:0043226 organelle; GO:0043227 membrane-bounded organelle; GO:0043228 non-membrane-bounded organelle; GO:0043229 intracellular organelle; GO:0043231 intracellular membrane-bounded…		PF00538	linker histone H1 and H5 family
A0A2G3AK49	Beta-glucosidase 12 OS=Capsicum annuum OX=4072 GN=T459_02484 PE=3 SV=1	T459_02484	1.558	2.34459e-05	Up	35.4	1.209	1.191	1.243	0.791	0.792	0.756	1.139	1.14	1.113	0.892	0.883	0.906	1.183	1.229	1.172	0.822	0.808	0.813	nucleus	K01188	E3.2.1.21; beta-glucosidase [EC:3.2.1.21]	map00460 Cyanoamino acid metabolism; map00500 Starch and sucrose metabolism; map00940 Phenylpropanoid biosynthesis; map01100 Metabolic pathways; map01110 Biosynthesis of secondary metabolites				PF00232	Glycosyl hydrolase family 1	G	KOG0626	Beta-glucosidase, lactase phlorizinhydrolase, and related proteins
A0A2G3ADD1	nephrocystin-3(predicted) OS=Capsicum annuum OX=4072 GN=T459_00075 PE=4 SV=1	T459_00075	1.303	0.000645936	Up	51.8	1.096	1.174	1.142	0.884	0.894	0.841	0.978	0.992	0.978	1.024	0.978	1.044	0.91	0.941	0.905	1.088	1.105	1.129	chloroplast				GO:0002009 morphogenesis of an epithelium; GO:0006996 organelle organization; GO:0007275 multicellular organism development; GO:0007369 gastrulation; GO:0009653 anatomical structure morphogenesis; GO:0009790 embryo development; GO:0009888 tissue development; GO:0009966 regulation of signal transduction; GO:0009968 negative regulation of signal transduction; GO:0009987 cellular process; GO:0010646…	GO:0005622 intracellular; GO:0005623 cell; GO:0005737 cytoplasm; GO:0005856 cytoskeleton; GO:0005874 microtubule; GO:0005886 plasma membrane; GO:0005929 cilium; GO:0015630 microtubule cytoskeleton; GO:0016020 membrane; GO:0042995 cell projection; GO:0043226 organelle; GO:0043228 non-membrane-bounded organelle; GO:0043229 intracellular organelle; GO:0043232 intracellular non-membrane-bounded organ…				Z	KOG1840	Kinesin light chain
A0A2G2ZKD1	Methionine--tRNA ligase (Fragment) OS=Capsicum annuum OX=4072 GN=T459_15467 PE=3 SV=1	T459_15467	1.321	0.000491138	Up	67.6	1.111	1.12	1.186	0.882	0.871	0.833	1.018	0.962	1.001	1.026	0.986	0.994	0.946	0.921	0.93	1.08	1.053	1.057	chloroplast	K01874	MARS, metG; methionyl-tRNA synthetase [EC:6.1.1.10]	map00450 Selenocompound metabolism; map00970 Aminoacyl-tRNA biosynthesis; map01100 Metabolic pathways	GO:0000003 reproduction; GO:0003006 developmental process involved in reproduction; GO:0006082 organic acid metabolic process; GO:0006139 nucleobase-containing compound metabolic process; GO:0006399 tRNA metabolic process; GO:0006412 translation; GO:0006418 tRNA aminoacylation for protein translation; GO:0006431 methionyl-tRNA aminoacylation; GO:0006518 peptide metabolic process; GO:0006520 cellu…	GO:0005622 intracellular; GO:0005623 cell; GO:0005737 cytoplasm; GO:0005739 mitochondrion; GO:0009507 chloroplast; GO:0009532 plastid stroma; GO:0009536 plastid; GO:0009570 chloroplast stroma; GO:0043226 organelle; GO:0043227 membrane-bounded organelle; GO:0043229 intracellular organelle; GO:0043231 intracellular membrane-bounded organelle;	GO:0003824 catalytic activity; GO:0004812 aminoacyl-tRNA ligase activity; GO:0004825 methionine-tRNA ligase activity; GO:0016874 ligase activity; GO:0016875 ligase activity, forming carbon-oxygen bonds; GO:0140098 catalytic activity, acting on RNA; GO:0140101 catalytic activity, acting on a tRNA;			J	KOG0436	Methionyl-tRNA synthetase
A0A2G2Y601	Copper transport protein CCH OS=Capsicum annuum OX=4072 GN=T459_29544 PE=4 SV=1	T459_29544	0.705	9.288e-05	Down	10.5	0.815	0.816	0.852	1.204	1.138	1.182	0.976	0.946	0.941	1.066	1.078	0.998	1.082	1.041	1.106	0.915	0.949	0.959	chloroplast	K07213	ATOX1, ATX1, copZ, golB; copper chaperone		GO:0006873 cellular ion homeostasis; GO:0006875 cellular metal ion homeostasis; GO:0006878 cellular copper ion homeostasis; GO:0006950 response to stress; GO:0006970 response to osmotic stress; GO:0009628 response to abiotic stimulus; GO:0009651 response to salt stress; GO:0009987 cellular process; GO:0010035 response to inorganic substance; GO:0010038 response to metal ion; GO:0019725 cellular h…	GO:0005576 extracellular region; GO:0005622 intracellular; GO:0005623 cell; GO:0005737 cytoplasm; GO:0009507 chloroplast; GO:0009536 plastid; GO:0043226 organelle; GO:0043227 membrane-bounded organelle; GO:0043229 intracellular organelle; GO:0043231 intracellular membrane-bounded organelle; GO:0048046 apoplast;	GO:0005488 binding; GO:0005507 copper ion binding; GO:0005515 protein binding; GO:0016530 metallochaperone activity; GO:0016531 copper chaperone activity; GO:0019904 protein domain specific binding; GO:0043167 ion binding; GO:0043169 cation binding; GO:0046872 metal ion binding; GO:0046914 transition metal ion binding; GO:0140104 molecular carrier activity;	PF00403	Heavy-metal-associated domain	P	KOG1603	Copper chaperone
A0A2G2YWR8	Nuclear poly(A) polymerase 2 OS=Capsicum annuum OX=4072 GN=T459_21497 PE=4 SV=1	T459_21497	1.365	0.00136349	Up	78.8	1.238	1.09	1.138	0.83	0.846	0.863	0.97	0.938	0.973	0.973	1.022	1.095							nucleus	K14376	PAP; poly(A) polymerase [EC:2.7.7.19]	map03015 mRNA surveillance pathway	GO:0006139 nucleobase-containing compound metabolic process; GO:0006378 mRNA polyadenylation; GO:0006396 RNA processing; GO:0006397 mRNA processing; GO:0006725 cellular aromatic compound metabolic process; GO:0006807 nitrogen compound metabolic process; GO:0008152 metabolic process; GO:0009987 cellular process; GO:0010467 gene expression; GO:0016070 RNA metabolic process; GO:0016071 mRNA metaboli…	GO:0005622 intracellular; GO:0005623 cell; GO:0005634 nucleus; GO:0005654 nucleoplasm; GO:0005847 mRNA cleavage and polyadenylation specificity factor complex; GO:0005849 mRNA cleavage factor complex; GO:0031974 membrane-enclosed lumen; GO:0031981 nuclear lumen; GO:0032991 protein-containing complex; GO:0043226 organelle; GO:0043227 membrane-bounded organelle; GO:0043229 intracellular organelle; …	GO:0003824 catalytic activity; GO:0004652 polynucleotide adenylyltransferase activity; GO:0016740 transferase activity; GO:0016772 transferase activity, transferring phosphorus-containing groups; GO:0016779 nucleotidyltransferase activity; GO:0070566 adenylyltransferase activity;	PF04928; PF04926	Poly(A) polymerase central domain; Poly(A) polymerase predicted RNA binding domain	A	KOG2245	Poly(A) polymerase and related nucleotidyltransferases
A0A2G2Z1B3	Pre-mRNA-processing-splicing factor 8 OS=Capsicum annuum OX=4072 GN=T459_19298 PE=4 SV=1	T459_19298	1.329	7.98287e-05	Up	275.1	1.158	1.152	1.107	0.843	0.872	0.857	0.985	0.959	0.949	1.024	1.039	1.025	0.898	0.9	0.904	1.142	1.126	1.064	cytoplasm	K12856	PRPF8, PRP8; pre-mRNA-processing factor 8	map03040 Spliceosome				PF08082; PF08083; PF10598; PF10597; PF10596; PF12134; PF08084	PRO8NT (NUC069), PrP8 N-terminal domain; PROCN (NUC071) domain; RNA recognition motif of the spliceosomal PrP8; U5-snRNA binding site 2 of PrP8; U6-snRNA interacting domain of PrP8; PRP8 domain IV core; PROCT (NUC072) domain	A	KOG1795	U5 snRNP spliceosome subunit
A0A1U8G2B3	TPR_REGION domain-containing protein(predicted) OS=Capsicum annuum OX=4072 GN=T459_08841 PE=4 SV=1	T459_08841	1.324	0.027738	Up	71.7	1.086	1.197	1.138	1.002	0.808	0.774	1.073	1.023	1.018	0.935	1.015	0.972	0.738	0.787	0.686	1.309	1.184	1.297	mitochondria				GO:0006996 organelle organization; GO:0009966 regulation of signal transduction; GO:0009968 negative regulation of signal transduction; GO:0009987 cellular process; GO:0010646 regulation of cell communication; GO:0010648 negative regulation of cell communication; GO:0016043 cellular component organization; GO:0022603 regulation of anatomical structure morphogenesis; GO:0022607 cellular component …	GO:0005623 cell; GO:0005929 cilium; GO:0042995 cell projection; GO:0043226 organelle; GO:0120025 plasma membrane bounded cell projection;				Z	KOG1840	Kinesin light chain
A0A2G2Z1F1	Putative ovule protein(predicted) OS=Capsicum annuum OX=4072 GN=T459_19253 PE=4 SV=1	T459_19253	1.324	0.000431306	Up	107.5	1.124	1.156	1.136	0.818	0.882	0.881	0.946	0.942	0.949	1.047	1.076	1.081	0.928	0.907	0.969	1.102	1.055	1.068	vacuolar membrane
A0A2G2ZM08	Heat shock protein 82 OS=Capsicum annuum OX=4072 GN=T459_11473 PE=4 SV=1	T459_11473	1.328	0.000666653	Up	18.5	1.18	1.164	1.081	0.862	0.876	0.842	0.993	1.028	0.963	1.032	0.972	1.018	0.858	0.89	0.849	1.173	1.109	1.126	nucleus	K04079	HSP90A, htpG; molecular chaperone HtpG	map04141 Protein processing in endoplasmic reticulum; map04626 Plant-pathogen interaction	GO:0002376 immune system process; GO:0006457 protein folding; GO:0006950 response to stress; GO:0006952 defense response; GO:0006955 immune response; GO:0009605 response to external stimulus; GO:0009607 response to biotic stimulus; GO:0009617 response to bacterium; GO:0009814 defense response, incompatible interaction; GO:0009816 defense response to bacterium, incompatible interaction; GO:0009987…					O	KOG0019	Molecular chaperone (HSP90 family)
A0A2G2Y5T7	Phospho-2-dehydro-3-deoxyheptonate aldolase OS=Capsicum annuum OX=4072 GN=T459_29356 PE=3 SV=1	T459_29356	1.306	0.00106812	Up	52	1.19	1.116	1.095	0.873	0.838	0.894							1.114	0.864	1.032	0.932	1.032	1.034	nucleus	K01626	E2.5.1.54, aroF, aroG, aroH; 3-deoxy-7-phosphoheptulonate synthase [EC:2.5.1.54]	map00400 Phenylalanine, tyrosine and tryptophan biosynthesis; map01100 Metabolic pathways; map01110 Biosynthesis of secondary metabolites; map01230 Biosynthesis of amino acids		GO:0005622 intracellular; GO:0005623 cell; GO:0005737 cytoplasm; GO:0009507 chloroplast; GO:0009536 plastid; GO:0043226 organelle; GO:0043227 membrane-bounded organelle; GO:0043229 intracellular organelle; GO:0043231 intracellular membrane-bounded organelle;		PF01474	Class-II DAHP synthetase family
A0A1U8DWR1	18.5 kDa class I heat shock protein OS=Capsicum annuum OX=4072 GN=T459_32220 PE=3 SV=1	T459_32220	0.67	9.41355e-05	Down	18.2	0.799	0.838	0.772	1.178	1.207	1.213	1.047	0.905	0.932	1.004	1.053	1.065							cytoplasm	K13993	HSP20; HSP20 family protein	map04141 Protein processing in endoplasmic reticulum	GO:0000302 response to reactive oxygen species; GO:0006950 response to stress; GO:0006979 response to oxidative stress; GO:0009266 response to temperature stimulus; GO:0009314 response to radiation; GO:0009408 response to heat; GO:0009416 response to light stimulus; GO:0009628 response to abiotic stimulus; GO:0009636 response to toxic substance; GO:0009642 response to light intensity; GO:0009644 …	GO:0005622 intracellular; GO:0005623 cell; GO:0005737 cytoplasm; GO:0009507 chloroplast; GO:0009536 plastid; GO:0043226 organelle; GO:0043227 membrane-bounded organelle; GO:0043229 intracellular organelle; GO:0043231 intracellular membrane-bounded organelle;				O	KOG0710	Molecular chaperone (small heat-shock protein Hsp26/Hsp42)
A0A2G3A827	Hexosyltransferase OS=Capsicum annuum OX=4072 GN=T459_05497 PE=3 SV=1	T459_05497	0.751	0.00613911	Down	34.5	0.857	0.812	0.952	1.11	1.157	1.222													chloroplast				GO:0000003 reproduction; GO:0003006 developmental process involved in reproduction; GO:0006029 proteoglycan metabolic process; GO:0006464 cellular protein modification process; GO:0006486 protein glycosylation; GO:0006493 protein O-linked glycosylation; GO:0006807 nitrogen compound metabolic process; GO:0007275 multicellular organism development; GO:0008152 metabolic process; GO:0009058 biosynthe…	GO:0005622 intracellular; GO:0005623 cell; GO:0005737 cytoplasm; GO:0005794 Golgi apparatus; GO:0012505 endomembrane system; GO:0043226 organelle; GO:0043227 membrane-bounded organelle; GO:0043229 intracellular organelle; GO:0043231 intracellular membrane-bounded organelle;	GO:0003824 catalytic activity; GO:0008378 galactosyltransferase activity; GO:0016740 transferase activity; GO:0016757 transferase activity, transferring glycosyl groups; GO:0016758 transferase activity, transferring hexosyl groups; GO:1990714 hydroxyproline O-galactosyltransferase activity;			G	KOG2287	Galactosyltransferases
A0A2G2ZFY9	Putative chloroplast J-like domain 1(predicted) OS=Capsicum annuum OX=4072 GN=T459_13932 PE=4 SV=1	T459_13932	1.381	0.000141837	Up	33.1	1.166	1.154	1.162	0.834	0.876	0.811							1.07	1.02	0.992	0.96	0.997	0.97	chloroplast
A0A1U8E6M6	18.5 kDa class I heat shock protein OS=Capsicum annuum OX=4072 GN=T459_32218 PE=3 SV=1	T459_32218	0.677	0.00024861	Down	18.1	0.818	0.774	0.832	1.244	1.19	1.149	0.95	0.957	0.936	1.058	1	1.104							cytoplasm	K13993	HSP20; HSP20 family protein	map04141 Protein processing in endoplasmic reticulum	GO:0000302 response to reactive oxygen species; GO:0006950 response to stress; GO:0006979 response to oxidative stress; GO:0009266 response to temperature stimulus; GO:0009314 response to radiation; GO:0009408 response to heat; GO:0009416 response to light stimulus; GO:0009628 response to abiotic stimulus; GO:0009636 response to toxic substance; GO:0009642 response to light intensity; GO:0009644 …	GO:0005622 intracellular; GO:0005623 cell; GO:0005737 cytoplasm; GO:0009507 chloroplast; GO:0009536 plastid; GO:0043226 organelle; GO:0043227 membrane-bounded organelle; GO:0043229 intracellular organelle; GO:0043231 intracellular membrane-bounded organelle;				O	KOG0710	Molecular chaperone (small heat-shock protein Hsp26/Hsp42)
A0A1U8G625	Aldehyde dehydrogenase, mitochondrial OS=Capsicum annuum OX=4072 GN=T459_10267 PE=3 SV=1	T459_10267	0.672	1.922e-06	Down	58.5	0.817	0.802	0.791	1.199	1.194	1.194	0.973	0.982	0.96	1.035	1.032	1.028	1.091	1.092	1.102	0.9	0.894	0.919	mitochondria	K00128	ALDH; aldehyde dehydrogenase (NAD+) [EC:1.2.1.3]	map00010 Glycolysis / Gluconeogenesis; map00053 Ascorbate and aldarate metabolism; map00071 Fatty acid degradation; map00280 Valine, leucine and isoleucine degradation; map00310 Lysine degradation; map00330 Arginine and proline metabolism; map00340 Histidine metabolism; map00380 Tryptophan metabolism; map00410 beta-Alanine metabolism; map00561 Glycerolipid metabolism; map00620 Pyruvate metabolism…						C	KOG2450	Aldehyde dehydrogenase
A0A1U8E625	1-phosphatidylinositol-4-phosphate 5-kinases(predicted) OS=Capsicum annuum OX=4072 GN=T459_23597 PE=4 SV=1	T459_23597	0.757	1.52184e-05	Down	17.8	0.868	0.872	0.849	1.156	1.128	1.134	0.953	0.959	1.004	0.987	1.07	1.032	0.992	1.051	1.23	0.914	0.921	0.901	mitochondria
A0A1U8H7S1	Protein trichome birefringence-like 43 OS=Capsicum annuum OX=4072 GN=T459_20376 PE=4 SV=1	T459_20376	0.55	2.23406e-05	Down	40.3	0.734	0.71	0.684	1.316	1.308	1.248	1.187	1.047	1.095	0.954	0.834	0.894							extracellular							PF14416	PMR5 N terminal Domain
A0A2G3AE44	Mannosyl-oligosaccharide glucosidase GCS1 OS=Capsicum annuum OX=4072 GN=T459_00345 PE=4 SV=1	T459_00345	1.367	0.000254992	Up	96.1	1.159	1.211	1.121	0.85	0.87	0.834	0.96	1.037	1.059	1.074	1.007	0.988	0.998	0.981	1.011	0.967	1.028	0.994	chloroplast	K01228	MOGS; mannosyl-oligosaccharide glucosidase [EC:3.2.1.106]	map00510 N-Glycan biosynthesis; map01100 Metabolic pathways; map04141 Protein processing in endoplasmic reticulum	GO:0006457 protein folding; GO:0006464 cellular protein modification process; GO:0006486 protein glycosylation; GO:0006487 protein N-linked glycosylation; GO:0006807 nitrogen compound metabolic process; GO:0007275 multicellular organism development; GO:0008152 metabolic process; GO:0008544 epidermis development; GO:0009058 biosynthetic process; GO:0009059 macromolecule biosynthetic process; GO:00…	GO:0005622 intracellular; GO:0005623 cell; GO:0005737 cytoplasm; GO:0005783 endoplasmic reticulum; GO:0005789 endoplasmic reticulum membrane; GO:0012505 endomembrane system; GO:0016020 membrane; GO:0031984 organelle subcompartment; GO:0042175 nuclear outer membrane-endoplasmic reticulum membrane network; GO:0043226 organelle; GO:0043227 membrane-bounded organelle; GO:0043229 intracellular organel…	GO:0003824 catalytic activity; GO:0004553 hydrolase activity, hydrolyzing O-glycosyl compounds; GO:0004558 alpha-1,4-glucosidase activity; GO:0004573 mannosyl-oligosaccharide glucosidase activity; GO:0015926 glucosidase activity; GO:0016787 hydrolase activity; GO:0016798 hydrolase activity, acting on glycosyl bonds; GO:0090599 alpha-glucosidase activity;	PF03200	Mannosyl oligosaccharide glucosidase	G	KOG2161	Glucosidase I
A0A2G2ZCC2	Activating signal cointegrator 1 complex subunit 3 OS=Capsicum annuum OX=4072 GN=T459_17646 PE=4 SV=1	T459_17646	1.314	0.000127814	Up	100.4	1.133	1.123	1.154	0.894	0.846	0.855	0.95	1.087	0.833	0.891	1.278	0.967	0.671	0.744	0.597	1.304	1.346	1.336	cytoplasm	K18663	ASCC3; activating signal cointegrator complex subunit 3 [EC:3.6.4.12]				GO:0003676 nucleic acid binding; GO:0003723 RNA binding; GO:0003729 mRNA binding; GO:0005488 binding; GO:0097159 organic cyclic compound binding; GO:1901363 heterocyclic compound binding;	PF00270	DEAD/DEAH box helicase	A	KOG0952	DNA/RNA helicase MER3/SLH1, DEAD-box superfamily
A0A2G2Z708	HTH myb-type domain-containing protein OS=Capsicum annuum OX=4072 GN=T459_15796 PE=4 SV=1	T459_15796	0.748	0.0115173	Down	47.7	0.822	0.903	0.845	1.015	1.205	1.217	1.155	0.918	0.868	1.152	0.87	1.047							nucleus							PF00249	Myb-like DNA-binding domain
A0A2G2Z908	Actin-depolymerizing factor (Fragment) OS=Capsicum annuum OX=4072 GN=T459_16407 PE=3 SV=1	T459_16407	0.711	0.000551856	Down	15.9	0.872	0.782	0.843	1.196	1.16	1.155													chloroplast	K05765	CFL; cofilin					PF00241	Cofilin/tropomyosin-type actin-binding protein	Z	KOG1735	Actin depolymerizing factor
A0A2G2ZWG4	Glutathione gamma-glutamylcysteinyltransferase 2 OS=Capsicum annuum OX=4072 GN=T459_08438 PE=4 SV=1	T459_08438	0.723	0.00184195	Down	33.9	0.844	0.802	0.899	1.126	1.242	1.153	0.896	0.976	0.905	1.128	1.142	1.005	0.9	0.93	0.965	1.037	1.043	1.13	nucleus	K05941	E2.3.2.15; glutathione gamma-glutamylcysteinyltransferase [EC:2.3.2.15]		GO:0006082 organic acid metabolic process; GO:0006518 peptide metabolic process; GO:0006725 cellular aromatic compound metabolic process; GO:0006790 sulfur compound metabolic process; GO:0006807 nitrogen compound metabolic process; GO:0006810 transport; GO:0006811 ion transport; GO:0006812 cation transport; GO:0006820 anion transport; GO:0006950 response to stress; GO:0006952 defense response; GO…	GO:0005622 intracellular; GO:0005623 cell; GO:0005737 cytoplasm; GO:0005829 cytosol;	GO:0003824 catalytic activity; GO:0005215 transporter activity; GO:0005488 binding; GO:0005507 copper ion binding; GO:0008324 cation transmembrane transporter activity; GO:0008490 arsenite secondary active transmembrane transporter activity; GO:0008509 anion transmembrane transporter activity; GO:0015075 ion transmembrane transporter activity; GO:0015103 inorganic anion transmembrane transporter …	PF05023	Phytochelatin synthase	P	KOG0632	Phytochelatin synthase
A0A2G2YZ08	Zeta-carotene desaturase, chloroplastic/chromoplastic OS=Capsicum annuum OX=4072 GN=T459_22246 PE=4 SV=1	T459_22246	1.315	0.00143667	Up	42.3	1.134	1.139	1.137	0.813	0.863	0.918	1.203	1.251	1.116	0.692	0.759	0.993	0.976	1.104	0.946	0.834	1.06	1.087	chloroplast	K00514	ZDS, crtQ; zeta-carotene desaturase [EC:1.3.5.6]	map00906 Carotenoid biosynthesis; map01100 Metabolic pathways; map01110 Biosynthesis of secondary metabolites	GO:0006629 lipid metabolic process; GO:0006720 isoprenoid metabolic process; GO:0006721 terpenoid metabolic process; GO:0008152 metabolic process; GO:0008299 isoprenoid biosynthetic process; GO:0008610 lipid biosynthetic process; GO:0009058 biosynthetic process; GO:0009987 cellular process; GO:0016108 tetraterpenoid metabolic process; GO:0016109 tetraterpenoid biosynthetic process; GO:0016114 ter…	GO:0005622 intracellular; GO:0005623 cell; GO:0005737 cytoplasm; GO:0009507 chloroplast; GO:0009509 chromoplast; GO:0009526 plastid envelope; GO:0009536 plastid; GO:0009941 chloroplast envelope; GO:0031967 organelle envelope; GO:0031975 envelope; GO:0043226 organelle; GO:0043227 membrane-bounded organelle; GO:0043229 intracellular organelle; GO:0043231 intracellular membrane-bounded organelle;	GO:0003824 catalytic activity; GO:0016491 oxidoreductase activity; GO:0016627 oxidoreductase activity, acting on the CH-CH group of donors; GO:0016635 oxidoreductase activity, acting on the CH-CH group of donors, quinone or related compound as acceptor; GO:0052886 9,9'-dicis-carotene:quinone oxidoreductase activity;	PF01593	Flavin containing amine oxidoreductase	H	KOG0029	Amine oxidase
A0A1U8EJX0	nucleolar complex protein 2 homolog isoform X2(predicted) OS=Capsicum annuum OX=4072 GN=T459_28061 PE=4 SV=1	T459_28061	1.383	0.000521959	Up	82	1.19	1.204	1.092	0.835	0.832	0.853	1.086	0.897	1.095	0.99	0.83	1.109	0.806	1.049	1.029	1.08	1.135	0.907	nucleus	K14833	NOC2; nucleolar complex protein 2							J	KOG2256	Predicted protein involved in nuclear export of pre-ribosomes
A0A2G2ZK45	AB hydrolase-1 domain-containing protein OS=Capsicum annuum OX=4072 GN=T459_15402 PE=4 SV=1	T459_15402	1.624	0.00011281	Up	36.5	1.208	1.292	1.218	0.796	0.732	0.762	1.236	1.216	1.234	0.797	0.778	0.739	1.272	1.267	1.182	0.787	0.761	0.71	cytoplasm							PF00561	alpha/beta hydrolase fold	I	KOG4178	Soluble epoxide hydrolase
A0A1U8F9R1	Costars family protein OS=Capsicum annuum OX=4072 GN=T459_27888 PE=4 SV=1	T459_27888	0.758	0.000150722	Down	11.9	0.855	0.895	0.841	1.154	1.134	1.129	0.928	0.96	1.038	0.982	1.08	1.016							cytoplasm									S	KOG3376	Uncharacterized conserved protein
A0A1U8EVY2	Pentatricopeptide repeat-containing protein, mitochondrial OS=Capsicum annuum OX=4072 GN=T459_27177 PE=4 SV=1	T459_27177	1.319	7.34941e-05	Up	70.3	1.147	1.123	1.137	0.856	0.841	0.886	0.952	0.904	0.948	1.074	1.049	1.051	0.844	0.808	0.796	1.186	1.193	1.17	chloroplast				GO:0006139 nucleobase-containing compound metabolic process; GO:0006725 cellular aromatic compound metabolic process; GO:0006807 nitrogen compound metabolic process; GO:0008152 metabolic process; GO:0009451 RNA modification; GO:0009987 cellular process; GO:0016070 RNA metabolic process; GO:0034641 cellular nitrogen compound metabolic process; GO:0043170 macromolecule metabolic process; GO:0043412…	GO:0005622 intracellular; GO:0005623 cell; GO:0005737 cytoplasm; GO:0005739 mitochondrion; GO:0043226 organelle; GO:0043227 membrane-bounded organelle; GO:0043229 intracellular organelle; GO:0043231 intracellular membrane-bounded organelle;	GO:0003676 nucleic acid binding; GO:0003723 RNA binding; GO:0003824 catalytic activity; GO:0004518 nuclease activity; GO:0004519 endonuclease activity; GO:0005488 binding; GO:0016787 hydrolase activity; GO:0016788 hydrolase activity, acting on ester bonds; GO:0097159 organic cyclic compound binding; GO:1901363 heterocyclic compound binding;			S	KOG4197	FOG: PPR repeat
A0A2G2YRR5	CytochromeB2 OS=Capsicum annuum OX=4072 GN=T459_23232 PE=3 SV=1	T459_23232	0.759	0.0113083	Down	39.8	0.836	0.814	0.941	1.228	1.057	1.13	1.03	1.122	0.998	1	0.936	0.922							chloroplast	K20667	CYP716A; beta-amyrin 28-monooxygenase [EC:1.14.14.126]		GO:0006629 lipid metabolic process; GO:0006694 steroid biosynthetic process; GO:0006720 isoprenoid metabolic process; GO:0006721 terpenoid metabolic process; GO:0006722 triterpenoid metabolic process; GO:0007275 multicellular organism development; GO:0008152 metabolic process; GO:0008202 steroid metabolic process; GO:0008610 lipid biosynthetic process; GO:0009058 biosynthetic process; GO:0009987 …		GO:0003824 catalytic activity; GO:0004497 monooxygenase activity; GO:0016491 oxidoreductase activity; GO:0016705 oxidoreductase activity, acting on paired donors, with incorporation or reduction of molecular oxygen; GO:0016709 oxidoreductase activity, acting on paired donors, with incorporation or reduction of molecular oxygen, NAD(P)H as one donor, and incorporation of one atom of oxygen;	PF00067	Cytochrome P450	Q	KOG0157	Cytochrome P450 CYP4/CYP19/CYP26 subfamilies
A0A2G2ZDB0	beta-glucosidase BoGH3B-like isoform X2(predicted) OS=Capsicum annuum OX=4072 GN=T459_18031 PE=4 SV=1	T459_18031	0.758	4.15216e-05	Down	67.2	0.849	0.871	0.864	1.154	1.109	1.144	0.976	0.987	1.003	0.995	0.99	1.02	1.166	0.992	1.135	0.893	0.914	0.906	chloroplast	K05349	bglX; beta-glucosidase [EC:3.2.1.21]	map00460 Cyanoamino acid metabolism; map00500 Starch and sucrose metabolism; map00940 Phenylpropanoid biosynthesis; map01100 Metabolic pathways; map01110 Biosynthesis of secondary metabolites				PF00933; PF01915	Glycosyl hydrolase family 3 N terminal domain; Glycosyl hydrolase family 3 C-terminal domain
A0A2G3A4C4	Putative RNA 3'-terminal phosphate cyclase-like protein OS=Capsicum annuum OX=4072 GN=T459_04202 PE=4 SV=1	T459_04202	1.309	0.000599937	Up	27.1	1.136	1.165	1.103	0.873	0.897	0.831							0.97	0.96	1.038	1.068	0.96	1.011	chloroplast	K11108	RCL1; RNA 3'-terminal phosphate cyclase-like protein	map03008 Ribosome biogenesis in eukaryotes	GO:0000469 cleavage involved in rRNA processing; GO:0000478 endonucleolytic cleavage involved in rRNA processing; GO:0000479 endonucleolytic cleavage of tricistronic rRNA transcript (SSU-rRNA, 5.8S rRNA, LSU-rRNA); GO:0006139 nucleobase-containing compound metabolic process; GO:0006364 rRNA processing; GO:0006396 RNA processing; GO:0006725 cellular aromatic compound metabolic process; GO:0006807 …	GO:0005622 intracellular; GO:0005623 cell; GO:0005634 nucleus; GO:0005730 nucleolus; GO:0031974 membrane-enclosed lumen; GO:0031981 nuclear lumen; GO:0043226 organelle; GO:0043227 membrane-bounded organelle; GO:0043228 non-membrane-bounded organelle; GO:0043229 intracellular organelle; GO:0043231 intracellular membrane-bounded organelle; GO:0043232 intracellular non-membrane-bounded organelle; GO…	GO:0003824 catalytic activity; GO:0004518 nuclease activity; GO:0004519 endonuclease activity; GO:0004521 endoribonuclease activity; GO:0004540 ribonuclease activity; GO:0016787 hydrolase activity; GO:0016788 hydrolase activity, acting on ester bonds; GO:0140098 catalytic activity, acting on RNA;	PF01137; PF05189	RNA 3'-terminal phosphate cyclase; RNA 3'-terminal phosphate cyclase (RTC), insert domain	A	KOG3980	RNA 3'-terminal phosphate cyclase
A0A2G2ZU53	26S proteasome non-ATPase regulatory subunit 13-like protein B OS=Capsicum annuum OX=4072 GN=T459_07609 PE=4 SV=1	T459_07609	1.435	3.62788e-05	Up	44.1	1.176	1.164	1.176	0.792	0.816	0.842	0.964	0.956	0.983	1.066	1.033	1.004	0.886	0.842	0.805	1.203	1.173	1.151	cytoplasm	K03039	PSMD13, RPN9; 26S proteasome regulatory subunit N9	map03050 Proteasome	GO:0006508 proteolysis; GO:0006511 ubiquitin-dependent protein catabolic process; GO:0006807 nitrogen compound metabolic process; GO:0008152 metabolic process; GO:0009056 catabolic process; GO:0009057 macromolecule catabolic process; GO:0009987 cellular process; GO:0016043 cellular component organization; GO:0019538 protein metabolic process; GO:0019941 modification-dependent protein catabolic pr…	GO:0000502 proteasome complex; GO:0005622 intracellular; GO:0005623 cell; GO:0005634 nucleus; GO:0005737 cytoplasm; GO:0005829 cytosol; GO:0005838 proteasome regulatory particle; GO:0008541 proteasome regulatory particle, lid subcomplex; GO:0022624 proteasome accessory complex; GO:0032991 protein-containing complex; GO:0043226 organelle; GO:0043227 membrane-bounded organelle; GO:0043229 intracell…	GO:0005198 structural molecule activity;	PF01399	PCI domain	O	KOG2908	26S proteasome regulatory complex, subunit RPN9/PSMD13
A0A2G2Y4B2	ABC transporter G family member 5 OS=Capsicum annuum OX=4072 GN=T459_28993 PE=4 SV=1	T459_28993	1.324	0.00296603	Up	71.2	1.143	1.072	1.205	0.903	0.859	0.822													plasma membrane	K05681	ABCG2, CD338; ATP-binding cassette, subfamily G (WHITE), member 2	map02010 ABC transporters	GO:0006810 transport; GO:0051179 localization; GO:0051234 establishment of localization; GO:0055085 transmembrane transport;	GO:0005623 cell; GO:0005886 plasma membrane; GO:0016020 membrane; GO:0016021 integral component of membrane; GO:0031224 intrinsic component of membrane; GO:0071944 cell periphery;	GO:0003824 catalytic activity; GO:0005215 transporter activity; GO:0015399 primary active transmembrane transporter activity; GO:0016462 pyrophosphatase activity; GO:0016787 hydrolase activity; GO:0016817 hydrolase activity, acting on acid anhydrides; GO:0016818 hydrolase activity, acting on acid anhydrides, in phosphorus-containing anhydrides; GO:0016887 ATPase activity; GO:0017111 nucleoside-tr…	PF00005	ABC transporter	Q	KOG0061	Transporter, ABC superfamily (Breast cancer resistance protein)
A0A2G2YIU3	Mitochondrial Rho GTPase 3 OS=Capsicum annuum OX=4072 GN=T459_24772 PE=4 SV=1	T459_24772	1.423	0.000220726	Up	56.9	1.204	1.139	1.184	0.79	0.85	0.838	1.124	1.167	1.092	0.892	0.881	0.856	0.953	0.798	0.865	1.15	1.177	1.062	cytoplasm	K07870	RHOT1, ARHT1; mitochondrial Rho GTPase 1 [EC:3.6.5.-]		GO:0001101 response to acid chemical; GO:0009719 response to endogenous stimulus; GO:0009725 response to hormone; GO:0009737 response to abscisic acid; GO:0010033 response to organic substance; GO:0033993 response to lipid; GO:0042221 response to chemical; GO:0050896 response to stimulus; GO:0097305 response to alcohol; GO:1901700 response to oxygen-containing compound;	GO:0005622 intracellular; GO:0005623 cell; GO:0005737 cytoplasm; GO:0005739 mitochondrion; GO:0043226 organelle; GO:0043227 membrane-bounded organelle; GO:0043229 intracellular organelle; GO:0043231 intracellular membrane-bounded organelle;	GO:0003824 catalytic activity; GO:0003924 GTPase activity; GO:0005488 binding; GO:0005509 calcium ion binding; GO:0016462 pyrophosphatase activity; GO:0016787 hydrolase activity; GO:0016817 hydrolase activity, acting on acid anhydrides; GO:0016818 hydrolase activity, acting on acid anhydrides, in phosphorus-containing anhydrides; GO:0017111 nucleoside-triphosphatase activity; GO:0043167 ion bindi…	PF00071	Ras family	V	KOG1707	Predicted Ras related/Rac-GTP binding protein
A0A1U8DUS5	Usp domain-containing protein OS=Capsicum annuum OX=4072 GN=T459_34593 PE=4 SV=1	T459_34593	0.763	3.42862e-05	Down	18.4	0.881	0.872	0.846	1.144	1.14	1.124	0.985	1.044	0.96	1.044	1.062	0.911							cytoplasm					GO:0005623 cell; GO:0005886 plasma membrane; GO:0016020 membrane; GO:0071944 cell periphery;	GO:0000166 nucleotide binding; GO:0005488 binding; GO:0008144 drug binding; GO:0016208 AMP binding; GO:0017076 purine nucleotide binding; GO:0030554 adenyl nucleotide binding; GO:0032553 ribonucleotide binding; GO:0032555 purine ribonucleotide binding; GO:0032559 adenyl ribonucleotide binding; GO:0036094 small molecule binding; GO:0043167 ion binding; GO:0043168 anion binding; GO:0043169 cation b…	PF00582	Universal stress protein family
A0A1U8FQ18	4-coumarate--CoA ligase-like 1 OS=Capsicum annuum OX=4072 GN=T459_07052 PE=4 SV=1	T459_07052	0.721	7.03451e-05	Down	61.1	0.813	0.861	0.846	1.17	1.144	1.179	1.034	1.072	1.039	0.944	0.963	0.973							plasma membrane	K01904	4CL; 4-coumarate--CoA ligase [EC:6.2.1.12]	map00130 Ubiquinone and other terpenoid-quinone biosynthesis; map00940 Phenylpropanoid biosynthesis; map01100 Metabolic pathways; map01110 Biosynthesis of secondary metabolites	GO:0001676 long-chain fatty acid metabolic process; GO:0006082 organic acid metabolic process; GO:0006139 nucleobase-containing compound metabolic process; GO:0006163 purine nucleotide metabolic process; GO:0006164 purine nucleotide biosynthetic process; GO:0006629 lipid metabolic process; GO:0006631 fatty acid metabolic process; GO:0006637 acyl-CoA metabolic process; GO:0006725 cellular aromatic…	GO:0005622 intracellular; GO:0005623 cell; GO:0005737 cytoplasm; GO:0005783 endoplasmic reticulum; GO:0012505 endomembrane system; GO:0043226 organelle; GO:0043227 membrane-bounded organelle; GO:0043229 intracellular organelle; GO:0043231 intracellular membrane-bounded organelle;	GO:0003824 catalytic activity; GO:0004467 long-chain fatty acid-CoA ligase activity; GO:0015645 fatty acid ligase activity; GO:0016405 CoA-ligase activity; GO:0016874 ligase activity; GO:0016877 ligase activity, forming carbon-sulfur bonds; GO:0016878 acid-thiol ligase activity; GO:0031956 medium-chain fatty acid-CoA ligase activity;	PF13193	Domain of unknown function (DUF4009)	I	KOG1176	Acyl-CoA synthetase
A0A2G2ZB89	desiccation-related protein PCC13-62-like(predicted) OS=Capsicum annuum OX=4072 GN=T459_17315 PE=4 SV=1	T459_17315	0.559	2.15081e-05	Down	37.8	0.704	0.703	0.728	1.318	1.22	1.284	0.942	0.969	0.95	1.04	1.058	1.055	1.019	1.019	1.012	0.968	0.967	0.956	cytoplasm					GO:0005622 intracellular; GO:0005623 cell; GO:0005737 cytoplasm;		PF13668	Ferritin-like domain
A0A2G2Y4L3	(E,E)-geranyllinalool synthase(predicted) OS=Capsicum annuum OX=4072 GN=T459_31655 PE=3 SV=1	T459_31655	1.408	1.30692e-05	Up	98.5	1.14	1.17	1.19	0.835	0.828	0.823	1.075	1.091	1.092	0.923	0.926	0.932	0.949	1.01	0.926	1.051	1.027	1.014	nucleus	K17982	TPS04, GES; geranyllinalool synthase [EC:4.2.3.144]	map00904 Diterpenoid biosynthesis	GO:0000302 response to reactive oxygen species; GO:0000304 response to singlet oxygen; GO:0001101 response to acid chemical; GO:0006629 lipid metabolic process; GO:0006720 isoprenoid metabolic process; GO:0006721 terpenoid metabolic process; GO:0006950 response to stress; GO:0006979 response to oxidative stress; GO:0007584 response to nutrient; GO:0008152 metabolic process; GO:0008299 isoprenoid …		GO:0003824 catalytic activity; GO:0016829 lyase activity; GO:0016835 carbon-oxygen lyase activity; GO:0016838 carbon-oxygen lyase activity, acting on phosphates; GO:0080013 (E,E)-geranyllinalool synthase activity;	PF01397; PF03936	Terpene synthase, N-terminal domain; Terpene synthase family, metal binding domain
A0A2G2YPH5	60S ribosomal protein L24 OS=Capsicum annuum OX=4072 GN=T459_22451 PE=4 SV=1	T459_22451	1.342	6.82807e-05	Up	19.7	1.16	1.161	1.124	0.847	0.879	0.842	1.226	1.028	1.06	0.912	0.902	0.883	0.984	0.944	0.968	1.034	1.058	1.019	mitochondria	K02896	RP-L24e, RPL24; large subunit ribosomal protein L24e	map03010 Ribosome	GO:0000003 reproduction; GO:0000027 ribosomal large subunit assembly; GO:0003006 developmental process involved in reproduction; GO:0006412 translation; GO:0006518 peptide metabolic process; GO:0006807 nitrogen compound metabolic process; GO:0006996 organelle organization; GO:0007154 cell communication; GO:0007165 signal transduction; GO:0007275 multicellular organism development; GO:0008152 meta…	GO:0005622 intracellular; GO:0005623 cell; GO:0005634 nucleus; GO:0005730 nucleolus; GO:0005737 cytoplasm; GO:0005829 cytosol; GO:0005840 ribosome; GO:0005886 plasma membrane; GO:0009507 chloroplast; GO:0009536 plastid; GO:0015934 large ribosomal subunit; GO:0016020 membrane; GO:0022625 cytosolic large ribosomal subunit; GO:0022626 cytosolic ribosome; GO:0031974 membrane-enclosed lumen; GO:003198…	GO:0003676 nucleic acid binding; GO:0003723 RNA binding; GO:0003729 mRNA binding; GO:0003735 structural constituent of ribosome; GO:0005198 structural molecule activity; GO:0005488 binding; GO:0097159 organic cyclic compound binding; GO:1901363 heterocyclic compound binding;	PF01246	Ribosomal protein L24e	J	KOG1722	60s ribosomal protein L24
A0A2G2ZX19	Fatty acyl-CoA reductase OS=Capsicum annuum OX=4072 GN=T459_08607 PE=3 SV=1	T459_08607	0.662	0.000165587	Down	64.8	0.757	0.811	0.816	1.243	1.172	1.184													chloroplast	K13356	FAR; alcohol-forming fatty acyl-CoA reductase [EC:1.2.1.84]	map00073 Cutin, suberine and wax biosynthesis; map04146 Peroxisome	GO:0006139 nucleobase-containing compound metabolic process; GO:0006163 purine nucleotide metabolic process; GO:0006637 acyl-CoA metabolic process; GO:0006725 cellular aromatic compound metabolic process; GO:0006732 coenzyme metabolic process; GO:0006753 nucleoside phosphate metabolic process; GO:0006790 sulfur compound metabolic process; GO:0006793 phosphorus metabolic process; GO:0006796 phosph…	GO:0005622 intracellular; GO:0005623 cell; GO:0043226 organelle; GO:0043227 membrane-bounded organelle; GO:0043229 intracellular organelle; GO:0043231 intracellular membrane-bounded organelle;	GO:0003824 catalytic activity; GO:0016491 oxidoreductase activity; GO:0016620 oxidoreductase activity, acting on the aldehyde or oxo group of donors, NAD or NADP as acceptor; GO:0016627 oxidoreductase activity, acting on the CH-CH group of donors; GO:0016628 oxidoreductase activity, acting on the CH-CH group of donors, NAD or NADP as acceptor; GO:0016903 oxidoreductase activity, acting on the ald…			I	KOG1221	Acyl-CoA reductase
A0A2G3AKK5	Abhydrolase_3 domain-containing protein OS=Capsicum annuum OX=4072 GN=T459_02622 PE=4 SV=1	T459_02622	0.708	0.000993152	Down	36.3	0.865	0.838	0.787	1.235	1.118	1.165	1.094	1.098	1.208	0.91	0.868	0.832	0.987	0.925	1.016	1.043	0.972	1.057	cytoskeleton							PF07859	alpha/beta hydrolase fold	V	KOG1515	Arylacetamide deacetylase
A0A2G3AFY4	Acyl-CoA-binding protein (Fragment) OS=Capsicum annuum OX=4072 GN=T459_01019 PE=4 SV=1	T459_01019	1.436	0.00601869	Up	13.7	1.156	1.19	1.194	0.883	0.868	0.714	1.229	1.31	1.243	0.74	0.804	0.718	1.172	1.276	1.232	0.791	0.778	0.788	cytoplasm	K08762	DBI, ACBP; diazepam-binding inhibitor (GABA receptor modulator, acyl-CoA-binding protein)					PF00887	Acyl CoA binding protein	I	KOG0817	Acyl-CoA-binding protein
A0A1U8GCS2	LIM domain-containing protein WLIM1 OS=Capsicum annuum OX=4072 GN=T459_12973 PE=4 SV=1	T459_12973	0.756	0.000311477	Down	21.7	0.829	0.857	0.9	1.133	1.144	1.143							0.816	0.915	0.921	1.205	1.029	1.117	chloroplast	K09377	CSRP; cysteine and glycine-rich protein		GO:0006996 organelle organization; GO:0007010 cytoskeleton organization; GO:0007015 actin filament organization; GO:0009987 cellular process; GO:0016043 cellular component organization; GO:0022607 cellular component assembly; GO:0030029 actin filament-based process; GO:0030036 actin cytoskeleton organization; GO:0044085 cellular component biogenesis; GO:0051017 actin filament bundle assembly; GO:…	GO:0005623 cell; GO:0005886 plasma membrane; GO:0016020 membrane; GO:0071944 cell periphery;	GO:0003676 nucleic acid binding; GO:0003723 RNA binding; GO:0003729 mRNA binding; GO:0003779 actin binding; GO:0005488 binding; GO:0005515 protein binding; GO:0008092 cytoskeletal protein binding; GO:0044877 protein-containing complex binding; GO:0051015 actin filament binding; GO:0097159 organic cyclic compound binding; GO:1901363 heterocyclic compound binding;	PF00412	LIM domain	TZ	KOG1700	Regulatory protein MLP and related LIM proteins
A0A1U8DV83	Histidine--tRNA ligase, cytoplasmic OS=Capsicum annuum OX=4072 GN=T459_33934 PE=3 SV=1	T459_33934	1.329	1.78432e-07	Up	98.5	1.147	1.145	1.145	0.862	0.868	0.857	0.959	0.941	0.962	1.075	1.061	1.021	0.906	0.883	0.852	1.153	1.148	1.099	chloroplast	K01892	HARS, hisS; histidyl-tRNA synthetase [EC:6.1.1.21]	map00970 Aminoacyl-tRNA biosynthesis	GO:0006412 translation; GO:0006518 peptide metabolic process; GO:0006807 nitrogen compound metabolic process; GO:0008152 metabolic process; GO:0009058 biosynthetic process; GO:0009059 macromolecule biosynthetic process; GO:0009987 cellular process; GO:0010467 gene expression; GO:0019538 protein metabolic process; GO:0032543 mitochondrial translation; GO:0034641 cellular nitrogen compound metaboli…	GO:0005622 intracellular; GO:0005623 cell; GO:0005737 cytoplasm; GO:0005739 mitochondrion; GO:0005829 cytosol; GO:0043226 organelle; GO:0043227 membrane-bounded organelle; GO:0043229 intracellular organelle; GO:0043231 intracellular membrane-bounded organelle;		PF13393; PF03129	Histidyl-tRNA synthetase; Anticodon binding domain	J	KOG1936	Histidyl-tRNA synthetase
A0A2G2YFA1	Calmodulin-binding transcription activator 4 (Fragment) OS=Capsicum annuum OX=4072 GN=T459_27915 PE=4 SV=1	T459_27915	1.671	0.000809073	Up	107.2	1.156	1.214	1.384	0.725	0.761	0.761	0.964	0.938	0.904	0.958	0.999	1.242	0.932	0.748	0.822	1.169	1.018	1.312	nucleus	K21596	CAMTA; calmodulin-binding transcription activator		GO:0006139 nucleobase-containing compound metabolic process; GO:0006351 transcription, DNA-templated; GO:0006355 regulation of transcription, DNA-templated; GO:0006357 regulation of transcription by RNA polymerase II; GO:0006366 transcription by RNA polymerase II; GO:0006725 cellular aromatic compound metabolic process; GO:0006807 nitrogen compound metabolic process; GO:0008152 metabolic process;…	GO:0005622 intracellular; GO:0005623 cell; GO:0005634 nucleus; GO:0005737 cytoplasm; GO:0005829 cytosol; GO:0043226 organelle; GO:0043227 membrane-bounded organelle; GO:0043229 intracellular organelle; GO:0043231 intracellular membrane-bounded organelle;	GO:0000981 DNA-binding transcription factor activity, RNA polymerase II-specific; GO:0001228 DNA-binding transcription activator activity, RNA polymerase II-specific; GO:0003676 nucleic acid binding; GO:0003677 DNA binding; GO:0003700 DNA-binding transcription factor activity; GO:0005488 binding; GO:0043565 sequence-specific DNA binding; GO:0097159 organic cyclic compound binding; GO:0140110 tran…	PF03859; PF01833	CG-1 domain; IPT/TIG domain	S	KOG0520	Uncharacterized conserved protein, contains IPT/TIG domain
A0A1U8EHL0	anther-specific protein LAT52-like isoform X1(predicted) OS=Capsicum annuum OX=4072 GN=T459_28398 PE=4 SV=1	T459_28398	0.677	0.00421723	Down	10.8	0.724	0.824	0.876	1.112	1.213	1.256	0.89	0.995	0.855	0.983	0.938	1.342	0.892	0.918	1.031	0.955	0.926	1.282	extracellular
A0A2G2YBG1	60S ribosomal protein L13a-4 OS=Capsicum annuum OX=4072 GN=T459_31316 PE=3 SV=1	T459_31316	1.354	0.00667418	Up	27.3	1.245	1.08	1.129	0.789	0.909	0.853	1.057	1.103	1.218	0.941	0.87	0.821	1.024	1.134	0.759	1.037	0.917	1.139	chloroplast	K02872	RP-L13Ae, RPL13A; large subunit ribosomal protein L13Ae	map03010 Ribosome	GO:0006412 translation; GO:0006518 peptide metabolic process; GO:0006807 nitrogen compound metabolic process; GO:0008152 metabolic process; GO:0009058 biosynthetic process; GO:0009059 macromolecule biosynthetic process; GO:0009987 cellular process; GO:0010467 gene expression; GO:0019538 protein metabolic process; GO:0034641 cellular nitrogen compound metabolic process; GO:0034645 cellular macromo…	GO:0005622 intracellular; GO:0005623 cell; GO:0005737 cytoplasm; GO:0005829 cytosol; GO:0005840 ribosome; GO:0015934 large ribosomal subunit; GO:0022625 cytosolic large ribosomal subunit; GO:0022626 cytosolic ribosome; GO:0032991 protein-containing complex; GO:0043226 organelle; GO:0043228 non-membrane-bounded organelle; GO:0043229 intracellular organelle; GO:0043232 intracellular non-membrane-bo…	GO:0003676 nucleic acid binding; GO:0003723 RNA binding; GO:0003729 mRNA binding; GO:0003735 structural constituent of ribosome; GO:0005198 structural molecule activity; GO:0005488 binding; GO:0097159 organic cyclic compound binding; GO:1901363 heterocyclic compound binding;			J	KOG3204	60S ribosomal protein L13a
A0A2G3A4X0	4-alpha-glucanotransferase DPE2 OS=Capsicum annuum OX=4072 GN=T459_04412 PE=4 SV=1	T459_04412	1.373	0.00430812	Up	40	1.048	1.099	1.205	0.868	0.805	0.768	1	0.994	1.004	1.028	0.959	0.958	0.806	0.96	0.944	1.15	1.18	1.133	chloroplast	K00705	malQ; 4-alpha-glucanotransferase [EC:2.4.1.25]	map00500 Starch and sucrose metabolism; map01100 Metabolic pathways; map01110 Biosynthesis of secondary metabolites	GO:0000023 maltose metabolic process; GO:0000025 maltose catabolic process; GO:0000272 polysaccharide catabolic process; GO:0005975 carbohydrate metabolic process; GO:0005976 polysaccharide metabolic process; GO:0005977 glycogen metabolic process; GO:0005982 starch metabolic process; GO:0005983 starch catabolic process; GO:0005984 disaccharide metabolic process; GO:0006073 cellular glucan metabol…	GO:0005622 intracellular; GO:0005623 cell; GO:0005737 cytoplasm; GO:0005829 cytosol;	GO:0003824 catalytic activity; GO:0004133 glycogen debranching enzyme activity; GO:0004134 4-alpha-glucanotransferase activity; GO:0005488 binding; GO:0010297 heteropolysaccharide binding; GO:0016740 transferase activity; GO:0016757 transferase activity, transferring glycosyl groups; GO:0016758 transferase activity, transferring hexosyl groups; GO:0030246 carbohydrate binding; GO:0030247 polysacc…	PF02446	4-alpha-glucanotransferase
A0A2G2Y3A4	DUF21 domain-containing protein OS=Capsicum annuum OX=4072 GN=T459_31892 PE=4 SV=1	T459_31892	1.342	0.000186121	Up	47	1.182	1.139	1.12	0.872	0.863	0.829	0.995	0.911	0.929	1.091	1.033	1.046	0.875	0.939	0.882	1.129	1.113	1.066	cytoplasm	K16302	CNNM; metal transporter CNNM			GO:0005623 cell; GO:0005886 plasma membrane; GO:0016020 membrane; GO:0071944 cell periphery;		PF01595	Domain of unknown function DUF21	S	KOG2118	Predicted membrane protein, contains two CBS domains
A0A1U8F6Y7	Exocyst complex component SEC5 OS=Capsicum annuum OX=4072 GN=T459_30464 PE=3 SV=1	T459_30464	1.51	0.00439331	Up	121.6	1.315	1.051	1.246	0.78	0.783	0.829	1.165	0.942	1.054	0.895	0.923	1.03							nucleus	K17637	EXOC2, SEC5; exocyst complex component 2		GO:0000003 reproduction; GO:0001927 exocyst assembly; GO:0006810 transport; GO:0006887 exocytosis; GO:0006904 vesicle docking involved in exocytosis; GO:0007154 cell communication; GO:0008037 cell recognition; GO:0009856 pollination; GO:0009875 pollen-pistil interaction; GO:0009987 cellular process; GO:0016043 cellular component organization; GO:0016192 vesicle-mediated transport; GO:0022406 memb…	GO:0000145 exocyst; GO:0005576 extracellular region; GO:0005615 extracellular space; GO:0005622 intracellular; GO:0005623 cell; GO:0005737 cytoplasm; GO:0005829 cytosol; GO:0005886 plasma membrane; GO:0005911 cell-cell junction; GO:0005938 cell cortex; GO:0009506 plasmodesma; GO:0016020 membrane; GO:0030054 cell junction; GO:0031982 vesicle; GO:0032991 protein-containing complex; GO:0043226 organ…				U	KOG2347	Sec5 subunit of exocyst complex
A0A1U8H5G9	Superoxide dismutase OS=Capsicum annuum OX=4072 GN=T459_16343 PE=3 SV=1	T459_16343	0.731	0.000246319	Down	28.2	0.849	0.852	0.844	1.16	1.11	1.211	1.004	0.994	1.027	1.014	0.961	1.022	1.3	1.328	1.234	0.724	0.735	0.696	chloroplast	K04564	SOD2; superoxide dismutase, Fe-Mn family [EC:1.15.1.1]	map04146 Peroxisome	GO:0000302 response to reactive oxygen species; GO:0000303 response to superoxide; GO:0000305 response to oxygen radical; GO:0006801 superoxide metabolic process; GO:0006950 response to stress; GO:0006979 response to oxidative stress; GO:0008152 metabolic process; GO:0009314 response to radiation; GO:0009411 response to UV; GO:0009416 response to light stimulus; GO:0009628 response to abiotic sti…	GO:0005622 intracellular; GO:0005623 cell; GO:0005737 cytoplasm; GO:0009295 nucleoid; GO:0009507 chloroplast; GO:0009532 plastid stroma; GO:0009536 plastid; GO:0009570 chloroplast stroma; GO:0009579 thylakoid; GO:0042644 chloroplast nucleoid; GO:0042646 plastid nucleoid; GO:0043226 organelle; GO:0043227 membrane-bounded organelle; GO:0043228 non-membrane-bounded organelle; GO:0043229 intracellula…	GO:0003824 catalytic activity; GO:0004784 superoxide dismutase activity; GO:0016209 antioxidant activity; GO:0016491 oxidoreductase activity; GO:0016721 oxidoreductase activity, acting on superoxide radicals as acceptor;	PF00081; PF02777	Iron/manganese superoxide dismutases, alpha-hairpin domain; Iron/manganese superoxide dismutases, C-terminal domain	P	KOG0876	Manganese superoxide dismutase
A0A2G2YKB1	Non-specific lipid-transfer protein OS=Capsicum annuum OX=4072 GN=T459_25287 PE=3 SV=1	T459_25287	0.649	5.09352e-05	Down	15.5	0.815	0.756	0.806	1.226	1.222	1.217													chloroplast				GO:0006810 transport; GO:0006869 lipid transport; GO:0010876 lipid localization; GO:0033036 macromolecule localization; GO:0051179 localization; GO:0051234 establishment of localization; GO:0071702 organic substance transport;	GO:0016020 membrane;
A0A2G2Y751	26S proteasome non-ATPase regulatory subunit 12-like protein B (Fragment) OS=Capsicum annuum OX=4072 GN=T459_29993 PE=4 SV=1	T459_29993	1.352	0.000188098	Up	39.2	1.15	1.171	1.124	0.883	0.834	0.832	0.951	0.948	1.076	0.952	1.018	1.05	0.937	0.882	0.856	1.152	1.154	1.09	cytoplasm	K03035	PSMD12, RPN5; 26S proteasome regulatory subunit N5	map03050 Proteasome	GO:0006508 proteolysis; GO:0006511 ubiquitin-dependent protein catabolic process; GO:0006807 nitrogen compound metabolic process; GO:0007275 multicellular organism development; GO:0008152 metabolic process; GO:0009056 catabolic process; GO:0009057 macromolecule catabolic process; GO:0009987 cellular process; GO:0010498 proteasomal protein catabolic process; GO:0019538 protein metabolic process; G…	GO:0000502 proteasome complex; GO:0005622 intracellular; GO:0005623 cell; GO:0005634 nucleus; GO:0005737 cytoplasm; GO:0005838 proteasome regulatory particle; GO:0008541 proteasome regulatory particle, lid subcomplex; GO:0022624 proteasome accessory complex; GO:0031595 nuclear proteasome complex; GO:0031974 membrane-enclosed lumen; GO:0031981 nuclear lumen; GO:0032991 protein-containing complex; …		PF01399	PCI domain	O	KOG1498	26S proteasome regulatory complex, subunit RPN5/PSMD12
A0A2G3A563	Phosphoinositide phosphatase SAC7 OS=Capsicum annuum OX=4072 GN=T459_04502 PE=4 SV=1	T459_04502	1.517	0.00365767	Up	64.7	1.149	1.344	1.127	0.841	0.737	0.808	1.029	0.908	0.948	0.986	1.046	1.017	0.823	0.859	0.803	1.139	1.222	1.141	cytoplasm	K21797	SAC1, SACM1L; phosphatidylinositol 4-phosphatase [EC:3.1.3.-]	map00562 Inositol phosphate metabolism; map01100 Metabolic pathways; map04070 Phosphatidylinositol signaling system	GO:0000902 cell morphogenesis; GO:0000904 cell morphogenesis involved in differentiation; GO:0006629 lipid metabolic process; GO:0006644 phospholipid metabolic process; GO:0006650 glycerophospholipid metabolic process; GO:0006793 phosphorus metabolic process; GO:0006796 phosphate-containing compound metabolic process; GO:0006950 response to stress; GO:0006970 response to osmotic stress; GO:000727…	GO:0005622 intracellular; GO:0005623 cell; GO:0005737 cytoplasm; GO:0005783 endoplasmic reticulum; GO:0005789 endoplasmic reticulum membrane; GO:0005886 plasma membrane; GO:0005911 cell-cell junction; GO:0009506 plasmodesma; GO:0012505 endomembrane system; GO:0016020 membrane; GO:0030054 cell junction; GO:0030427 site of polarized growth; GO:0031520 plasma membrane of cell tip; GO:0031984 organel…	GO:0003824 catalytic activity; GO:0016787 hydrolase activity; GO:0016788 hydrolase activity, acting on ester bonds; GO:0016791 phosphatase activity; GO:0034596 phosphatidylinositol phosphate 4-phosphatase activity; GO:0042578 phosphoric ester hydrolase activity; GO:0043812 phosphatidylinositol-4-phosphate phosphatase activity; GO:0052744 phosphatidylinositol monophosphate phosphatase activity; GO…			I	KOG1889	Putative phosphoinositide phosphatase
A0A2G3AA98	G-box-binding factor 1 OS=Capsicum annuum OX=4072 GN=T459_06295 PE=4 SV=1	T459_06295	0.664	0.000211793	Down	37.5	0.821	0.779	0.798	1.271	1.172	1.166													nucleus	K09060	GBF; plant G-box-binding factor		GO:0006355 regulation of transcription, DNA-templated; GO:0009889 regulation of biosynthetic process; GO:0010468 regulation of gene expression; GO:0010556 regulation of macromolecule biosynthetic process; GO:0019219 regulation of nucleobase-containing compound metabolic process; GO:0019222 regulation of metabolic process; GO:0031323 regulation of cellular metabolic process; GO:0031326 regulation …	GO:0005622 intracellular; GO:0005623 cell; GO:0005634 nucleus; GO:0005737 cytoplasm; GO:0043226 organelle; GO:0043227 membrane-bounded organelle; GO:0043229 intracellular organelle; GO:0043231 intracellular membrane-bounded organelle;	GO:0001067 regulatory region nucleic acid binding; GO:0003676 nucleic acid binding; GO:0003677 DNA binding; GO:0003700 DNA-binding transcription factor activity; GO:0005488 binding; GO:0043565 sequence-specific DNA binding; GO:0097159 organic cyclic compound binding; GO:0140110 transcription regulator activity; GO:1901363 heterocyclic compound binding;
A0A2G2YWQ8	Fe(2+) transport protein 3, chloroplastic (Fragment) OS=Capsicum annuum OX=4072 GN=T459_21332 PE=3 SV=1	T459_21332	0.718	1.6083e-05	Down	43.8	0.838	0.851	0.822	1.172	1.179	1.145													plasma membrane	K14709	SLC39A1_2_3, ZIP1_2_3; solute carrier family 39 (zinc transporter), member 1/2/3		GO:0000041 transition metal ion transport; GO:0006810 transport; GO:0006811 ion transport; GO:0006812 cation transport; GO:0006826 iron ion transport; GO:0006829 zinc ion transport; GO:0009605 response to external stimulus; GO:0009607 response to biotic stimulus; GO:0009624 response to nematode; GO:0010035 response to inorganic substance; GO:0010038 response to metal ion; GO:0010043 response to z…	GO:0005622 intracellular; GO:0005623 cell; GO:0005737 cytoplasm; GO:0005773 vacuole; GO:0005774 vacuolar membrane; GO:0005886 plasma membrane; GO:0016020 membrane; GO:0031090 organelle membrane; GO:0043226 organelle; GO:0043227 membrane-bounded organelle; GO:0043229 intracellular organelle; GO:0043231 intracellular membrane-bounded organelle; GO:0071944 cell periphery; GO:0098588 bounding membran…	GO:0005215 transporter activity; GO:0005381 iron ion transmembrane transporter activity; GO:0005385 zinc ion transmembrane transporter activity; GO:0008324 cation transmembrane transporter activity; GO:0015075 ion transmembrane transporter activity; GO:0015318 inorganic molecular entity transmembrane transporter activity; GO:0022857 transmembrane transporter activity; GO:0022890 inorganic cation …			P	KOG1558	Fe2+/Zn2+ regulated transporter
A0A1U8EV20	DNA ligase OS=Capsicum annuum OX=4072 GN=T459_28705 PE=3 SV=1	T459_28705	1.333	1.72909e-05	Up	95.6	1.161	1.147	1.126	0.846	0.869	0.861	0.955	0.999	0.958	1.01	1.007	1.084	0.959	0.96	0.936	1.126	1.055	1.006	chloroplast	K10747	LIG1; DNA ligase 1 [EC:6.5.1.1 6.5.1.6 6.5.1.7]	map03030 DNA replication; map03410 Base excision repair; map03420 Nucleotide excision repair; map03430 Mismatch repair				PF01068	ATP dependent DNA ligase domain	L	KOG0967	ATP-dependent DNA ligase I
A0A2G2YGJ9	Phototropin-2 (Fragment) OS=Capsicum annuum OX=4072 GN=T459_28332 PE=4 SV=1	T459_28332	0.594	0.003186	Down	101.4	0.726	0.838	0.675	1.366	1.266	1.139	0.962	0.988	0.916	1.108	0.979	1.117	0.894	0.996	1.091	0.962	1.054	1.008	nucleus	K20715	PHOT; phototropin [EC:2.7.11.1]		GO:0006464 cellular protein modification process; GO:0006468 protein phosphorylation; GO:0006793 phosphorus metabolic process; GO:0006796 phosphate-containing compound metabolic process; GO:0006807 nitrogen compound metabolic process; GO:0006996 organelle organization; GO:0007154 cell communication; GO:0007165 signal transduction; GO:0007623 circadian rhythm; GO:0008152 metabolic process; GO:0009…	GO:0005622 intracellular; GO:0005623 cell; GO:0005634 nucleus; GO:0005737 cytoplasm; GO:0005773 vacuole; GO:0005886 plasma membrane; GO:0009898 cytoplasmic side of plasma membrane; GO:0009986 cell surface; GO:0016020 membrane; GO:0043226 organelle; GO:0043227 membrane-bounded organelle; GO:0043229 intracellular organelle; GO:0043231 intracellular membrane-bounded organelle; GO:0071944 cell periph…	GO:0000166 nucleotide binding; GO:0003676 nucleic acid binding; GO:0003723 RNA binding; GO:0003729 mRNA binding; GO:0003824 catalytic activity; GO:0004672 protein kinase activity; GO:0004674 protein serine/threonine kinase activity; GO:0005488 binding; GO:0005515 protein binding; GO:0009881 photoreceptor activity; GO:0009882 blue light photoreceptor activity; GO:0010181 FMN binding; GO:0016301 ki…	PF13426; PF00069	PAS domain; Protein kinase domain	T	KOG0610	Putative serine/threonine protein kinase
A0A2G2Z524	Thioredoxin M1, chloroplastic (Fragment) OS=Capsicum annuum OX=4072 GN=T459_20642 PE=4 SV=1	T459_20642	0.717	8.46368e-05	Down	20.3	0.837	0.816	0.856	1.184	1.183	1.131	0.901	0.91	0.876	1.112	1.128	1.077	0.914	0.965	0.926	1.07	1.061	1.07	chloroplast	K03671	trxA; thioredoxin 1					PF00085	Thioredoxin	O	KOG0910	Thioredoxin-like protein
A0A2G2ZJX6	26S proteasome non-ATPase regulatory subunit 1 homolog OS=Capsicum annuum OX=4072 GN=T459_15304 PE=3 SV=1	T459_15304	1.371	2.92745e-06	Up	108.5	1.162	1.167	1.157	0.85	0.835	0.858	0.94	1	0.992	1.031	1.014	1.006	0.868	0.916	0.906	1.178	1.113	1.093	endoplasmic reticulum	K03032	PSMD1, RPN2; 26S proteasome regulatory subunit N2	map03050 Proteasome	GO:0006508 proteolysis; GO:0006511 ubiquitin-dependent protein catabolic process; GO:0006807 nitrogen compound metabolic process; GO:0008152 metabolic process; GO:0009056 catabolic process; GO:0009057 macromolecule catabolic process; GO:0009987 cellular process; GO:0010498 proteasomal protein catabolic process; GO:0019538 protein metabolic process; GO:0019941 modification-dependent protein catabo…	GO:0000502 proteasome complex; GO:0005622 intracellular; GO:0005623 cell; GO:0005634 nucleus; GO:0005737 cytoplasm; GO:0005829 cytosol; GO:0005838 proteasome regulatory particle; GO:0005886 plasma membrane; GO:0008540 proteasome regulatory particle, base subcomplex; GO:0016020 membrane; GO:0022624 proteasome accessory complex; GO:0031597 cytosolic proteasome complex; GO:0032991 protein-containing…				O	KOG2062	26S proteasome regulatory complex, subunit RPN2/PSMD1
A0A1U8ETR1	Abscisic acid receptor PYL3 OS=Capsicum annuum OX=4072 GN=T459_31042 PE=4 SV=1	T459_31042	0.583	0.00493805	Down	21	0.653	0.72	0.84	1.175	1.192	1.426													cytoskeleton	K14496	PYL; abscisic acid receptor PYR/PYL family	map04016 MAPK signaling pathway - plant; map04075 Plant hormone signal transduction	GO:0001101 response to acid chemical; GO:0006950 response to stress; GO:0007154 cell communication; GO:0007165 signal transduction; GO:0007275 multicellular organism development; GO:0009266 response to temperature stimulus; GO:0009409 response to cold; GO:0009414 response to water deprivation; GO:0009415 response to water; GO:0009628 response to abiotic stimulus; GO:0009719 response to endogenous…	GO:0005622 intracellular; GO:0005623 cell; GO:0005634 nucleus; GO:0005737 cytoplasm; GO:0005829 cytosol; GO:0043226 organelle; GO:0043227 membrane-bounded organelle; GO:0043229 intracellular organelle; GO:0043231 intracellular membrane-bounded organelle;	GO:0005488 binding; GO:0005515 protein binding; GO:0008289 lipid binding; GO:0010427 abscisic acid binding; GO:0019840 isoprenoid binding; GO:0031406 carboxylic acid binding; GO:0033293 monocarboxylic acid binding; GO:0036094 small molecule binding; GO:0042562 hormone binding; GO:0042802 identical protein binding; GO:0042803 protein homodimerization activity; GO:0043167 ion binding; GO:0043168 an…
A0A1U8E8T7	Dolichyl-diphosphooligosaccharide--protein glycosyltransferase 48 kDa subunit OS=Capsicum annuum OX=4072 GN=T459_31799 PE=3 SV=1	T459_31799	1.357	2.29291e-05	Up	48.3	1.14	1.152	1.164	0.835	0.842	0.869	0.984	1.058	0.987	0.993	0.992	0.981	1.007	0.953	0.956	1.037	1.022	1.014	vacuolar membrane	K12670	WBP1; oligosaccharyltransferase complex subunit beta	map00510 N-Glycan biosynthesis; map00513 Various types of N-glycan biosynthesis; map01100 Metabolic pathways; map04141 Protein processing in endoplasmic reticulum						O	KOG2754	Oligosaccharyltransferase, beta subunit
A0A2G2ZBQ2	Pumilio-like protein 23(predicted) OS=Capsicum annuum OX=4072 GN=T459_17393 PE=4 SV=1	T459_17393	1.369	0.00144882	Up	24.4	1.161	1.167	1.142	0.86	0.781	0.893	0.903	1.028	0.689	1.19	1.197	0.998							nucleus	K14790	NOP9; nucleolar protein 9		GO:0009743 response to carbohydrate; GO:0009744 response to sucrose; GO:0009746 response to hexose; GO:0009749 response to glucose; GO:0010033 response to organic substance; GO:0010252 auxin homeostasis; GO:0034284 response to monosaccharide; GO:0034285 response to disaccharide; GO:0042221 response to chemical; GO:0042592 homeostatic process; GO:0048878 chemical homeostasis; GO:0050896 response t…	GO:0005622 intracellular; GO:0005623 cell; GO:0005634 nucleus; GO:0005730 nucleolus; GO:0031974 membrane-enclosed lumen; GO:0031981 nuclear lumen; GO:0043226 organelle; GO:0043227 membrane-bounded organelle; GO:0043228 non-membrane-bounded organelle; GO:0043229 intracellular organelle; GO:0043231 intracellular membrane-bounded organelle; GO:0043232 intracellular non-membrane-bounded organelle; GO…				J	KOG2188	Predicted RNA-binding protein, contains Pumilio domains
A0A2G2XZU6	Cytochrome b OS=Capsicum annuum OX=4072 GN=T459_33112 PE=4 SV=1	T459_33112	0.687	0.0087695	Down	17.2	0.777	0.83	0.84	1.288	1.02	1.253	0.93	0.812	1.159	1.06	1.037	1.005							plasma membrane	K00412	CYTB, petB; ubiquinol-cytochrome c reductase cytochrome b subunit	map00190 Oxidative phosphorylation; map01100 Metabolic pathways				PF00032	Cytochrome b(C-terminal)/b6/petD	C	KOG4663	Cytochrome b
A0A1U8EFF6	CytochromeA2 OS=Capsicum annuum OX=4072 GN=T459_25077 PE=3 SV=1	T459_25077	0.764	0.00605035	Down	62.7	0.934	0.829	0.813	1.124	1.176	1.072													chloroplast	K20496	CYP703A2; laurate 7-monooxygenase [EC:1.14.14.130]		GO:0000003 reproduction; GO:0002933 lipid hydroxylation; GO:0003006 developmental process involved in reproduction; GO:0006082 organic acid metabolic process; GO:0006629 lipid metabolic process; GO:0006631 fatty acid metabolic process; GO:0006633 fatty acid biosynthetic process; GO:0006725 cellular aromatic compound metabolic process; GO:0007275 multicellular organism development; GO:0008152 meta…	GO:0016020 membrane;	GO:0003824 catalytic activity; GO:0004497 monooxygenase activity; GO:0016491 oxidoreductase activity; GO:0016705 oxidoreductase activity, acting on paired donors, with incorporation or reduction of molecular oxygen; GO:0016709 oxidoreductase activity, acting on paired donors, with incorporation or reduction of molecular oxygen, NAD(P)H as one donor, and incorporation of one atom of oxygen; GO:005…	PF00067	Cytochrome P450	Q	KOG0156	Cytochrome P450 CYP2 subfamily
A0A2G2Y0S2	Ubiquitin carboxyl-terminal hydrolase OS=Capsicum annuum OX=4072 GN=T459_32806 PE=3 SV=1	T459_32806	1.353	3.43532e-06	Up	82.6	1.163	1.139	1.137	0.841	0.847	0.853	0.945	0.93	0.886	1.106	1.058	1.079	0.819	0.764	0.794	1.236	1.228	1.193	cytoplasm	K11838	USP7, UBP15; ubiquitin carboxyl-terminal hydrolase 7 [EC:3.4.19.12]					PF00917	MATH domain	O	KOG1863	Ubiquitin carboxyl-terminal hydrolase
A0A2G2Y5B6	Protein CURVATURE THYLAKOID 1A, chloroplastic OS=Capsicum annuum OX=4072 GN=T459_29343 PE=4 SV=1	T459_29343	1.343	0.00342986	Up	49.6	1.162	1.184	1.095	0.857	0.792	0.914	0.942	1.139	1.072	0.986	0.955	0.914	1.185	1.081	1.047	0.877	0.997	0.826	mitochondria					GO:0005622 intracellular; GO:0005623 cell; GO:0005737 cytoplasm; GO:0009507 chloroplast; GO:0009534 chloroplast thylakoid; GO:0009535 chloroplast thylakoid membrane; GO:0009536 plastid; GO:0009579 thylakoid; GO:0016020 membrane; GO:0031976 plastid thylakoid; GO:0031984 organelle subcompartment; GO:0034357 photosynthetic membrane; GO:0042651 thylakoid membrane; GO:0043226 organelle; GO:0043227 mem…		PF14159	Domain of unknown function (DUF4308)
A0A1U8ECR2	Terpene cyclase/mutase family member OS=Capsicum annuum OX=4072 GN=T459_24091 PE=3 SV=1	T459_24091	1.463	0.00155347	Up	87.3	1.245	1.199	1.077	0.768	0.833	0.806	1.022	1.152	1.116	0.885	0.899	0.924	0.968	1.208	1.145	0.799	0.999	0.891	endoplasmic reticulum	K15813	LUP4; beta-amyrin synthase [EC:5.4.99.39]	map00909 Sesquiterpenoid and triterpenoid biosynthesis; map01110 Biosynthesis of secondary metabolites				PF13249; PF13243	Prenyltransferase-like; Prenyltransferase-like	I	KOG0497	Oxidosqualene-lanosterol cyclase and related proteins
A0A2G2ZRJ7	SCP2 domain-containing protein OS=Capsicum annuum OX=4072 GN=T459_13059 PE=4 SV=1	T459_13059	0.725	6.50261e-05	Down	9.3	0.853	0.854	0.814	1.174	1.166	1.137	0.826	1.035	0.907	1.051	1.044	1.139							nucleus				GO:0006082 organic acid metabolic process; GO:0006629 lipid metabolic process; GO:0006631 fatty acid metabolic process; GO:0007154 cell communication; GO:0007165 signal transduction; GO:0008152 metabolic process; GO:0009987 cellular process; GO:0019752 carboxylic acid metabolic process; GO:0019932 second-messenger-mediated signaling; GO:0019933 cAMP-mediated signaling; GO:0019935 cyclic-nucleotid…	GO:0005622 intracellular; GO:0005623 cell; GO:0005737 cytoplasm; GO:0005777 peroxisome; GO:0042579 microbody; GO:0043226 organelle; GO:0043227 membrane-bounded organelle; GO:0043229 intracellular organelle; GO:0043231 intracellular membrane-bounded organelle;				I	KOG4170	2-enoyl-CoA hydratase/3-hydroxyacyl-CoA dehydrogenase/Peroxisomal 3-ketoacyl-CoA-thiolase, sterol-binding domain and related enzymes
A0A1U8G1I7	Putative ovule protein(predicted) OS=Capsicum annuum OX=4072 GN=T459_00037 PE=4 SV=1	T459_00037	0.557	4.77815e-06	Down	17.6	0.711	0.716	0.72	1.314	1.298	1.242	1.126	1.092	1.092	0.867	0.865	0.85							cytoplasm
A0A1U8EMD1	Phosphoenolpyruvate carboxylase OS=Capsicum annuum OX=4072 GN=T459_24731 PE=3 SV=1	T459_24731	1.346	0.000111698	Up	110.9	1.169	1.164	1.108	0.836	0.858	0.862	0.922	0.936	0.912	1.084	1.052	1.092	0.86	0.867	0.834	1.134	1.143	1.127	cytoplasm	K01595	ppc; phosphoenolpyruvate carboxylase [EC:4.1.1.31]	map00620 Pyruvate metabolism; map00710 Carbon fixation in photosynthetic organisms; map01100 Metabolic pathways; map01200 Carbon metabolism	GO:0006950 response to stress; GO:0007154 cell communication; GO:0007275 multicellular organism development; GO:0009267 cellular response to starvation; GO:0009605 response to external stimulus; GO:0009987 cellular process; GO:0009991 response to extracellular stimulus; GO:0016036 cellular response to phosphate starvation; GO:0016043 cellular component organization; GO:0022607 cellular component …	GO:0005576 extracellular region; GO:0005622 intracellular; GO:0005623 cell; GO:0005737 cytoplasm; GO:0005829 cytosol; GO:0009507 chloroplast; GO:0009536 plastid; GO:0043226 organelle; GO:0043227 membrane-bounded organelle; GO:0043229 intracellular organelle; GO:0043231 intracellular membrane-bounded organelle; GO:0048046 apoplast;	GO:0003824 catalytic activity; GO:0004611 phosphoenolpyruvate carboxykinase activity; GO:0008964 phosphoenolpyruvate carboxylase activity; GO:0016829 lyase activity; GO:0016830 carbon-carbon lyase activity; GO:0016831 carboxy-lyase activity;
A0A2G2Y4D1	mitochondrial outer membrane protein porin of 36 kDa(predicted) OS=Capsicum annuum OX=4072 GN=T459_29009 PE=4 SV=1	T459_29009	0.767	0.00205738	Down	6	0.865	0.819	0.923	1.16	1.135	1.104	0.839	0.883	0.876	1.185	1.123	1.096	1.091	1.097	1.032	0.948	0.838	1.005	cytoplasm	K15040	VDAC2; voltage-dependent anion channel protein 2		GO:0006810 transport; GO:0006811 ion transport; GO:0006820 anion transport; GO:0015698 inorganic anion transport; GO:0034220 ion transmembrane transport; GO:0051179 localization; GO:0051234 establishment of localization; GO:0055085 transmembrane transport; GO:0098656 anion transmembrane transport;	GO:0005622 intracellular; GO:0005623 cell; GO:0005737 cytoplasm; GO:0005739 mitochondrion; GO:0005740 mitochondrial envelope; GO:0005741 mitochondrial outer membrane; GO:0009526 plastid envelope; GO:0009527 plastid outer membrane; GO:0009536 plastid; GO:0016020 membrane; GO:0016021 integral component of membrane; GO:0019867 outer membrane; GO:0031090 organelle membrane; GO:0031224 intrinsic compo…	GO:0005215 transporter activity; GO:0005216 ion channel activity; GO:0005244 voltage-gated ion channel activity; GO:0005253 anion channel activity; GO:0008308 voltage-gated anion channel activity; GO:0008509 anion transmembrane transporter activity; GO:0015075 ion transmembrane transporter activity; GO:0015103 inorganic anion transmembrane transporter activity; GO:0015267 channel activity; GO:001…			P	KOG3126	Porin/voltage-dependent anion-selective channel protein
A0A1U8GVI0	Acyl carrier protein OS=Capsicum annuum OX=4072 GN=T459_16791 PE=3 SV=1	T459_16791	0.685	0.000613138	Down	14.3	0.794	0.83	0.819	1.152	1.137	1.275	0.875	1	0.877	1.125	1.062	1.066	0.819	0.695	0.749	1.197	1.348	1.191	chloroplast					GO:0005622 intracellular; GO:0005623 cell; GO:0005737 cytoplasm; GO:0009507 chloroplast; GO:0009536 plastid; GO:0043226 organelle; GO:0043227 membrane-bounded organelle; GO:0043229 intracellular organelle; GO:0043231 intracellular membrane-bounded organelle;		PF00550	Phosphopantetheine attachment site	I	KOG1748	Acyl carrier protein/NADH-ubiquinone oxidoreductase, NDUFAB1/SDAP subunit
A0A1U8FFE7	FT-interacting protein(predicted) OS=Capsicum annuum OX=4072 GN=T459_04476 PE=4 SV=1	T459_04476	1.307	0.00716981	Up	82.2	1.15	1.057	1.195	0.807	0.873	0.922													plasma membrane
A0A1U8GL68	Fumarylacetoacetase OS=Capsicum annuum OX=4072 GN=T459_33633 PE=3 SV=1	T459_33633	0.769	0.0124104	Down	46.2	0.85	0.799	0.961	1.068	1.166	1.161	0.998	0.958	0.926	1.124	1.109	0.891							cytoplasm	K01555	FAH, fahA; fumarylacetoacetase [EC:3.7.1.2]	map00350 Tyrosine metabolism; map01100 Metabolic pathways	GO:0006082 organic acid metabolic process; GO:0006520 cellular amino acid metabolic process; GO:0006570 tyrosine metabolic process; GO:0006572 tyrosine catabolic process; GO:0006725 cellular aromatic compound metabolic process; GO:0006807 nitrogen compound metabolic process; GO:0008152 metabolic process; GO:0008219 cell death; GO:0009056 catabolic process; GO:0009063 cellular amino acid catabolic…	GO:0005622 intracellular; GO:0005623 cell; GO:0005737 cytoplasm; GO:0005829 cytosol;	GO:0003824 catalytic activity; GO:0004334 fumarylacetoacetase activity; GO:0016787 hydrolase activity; GO:0016822 hydrolase activity, acting on acid carbon-carbon bonds; GO:0016823 hydrolase activity, acting on acid carbon-carbon bonds, in ketonic substances;	PF09298	Domain of unknown function (DUF1969)	G	KOG2843	Fumarylacetoacetase
A0A2G2XX50	U6 snRNA-associated Sm-like protein LSm4 (Fragment) OS=Capsicum annuum OX=4072 GN=LSM4 PE=3 SV=1	LSM4	0.607	4.06191e-05	Down	15.8	0.787	0.761	0.722	1.234	1.255	1.25	0.987	0.934	0.944	1.106	1	1.034	1	0.995	1.019	1.021	1.027	0.947	mitochondria	K12623	LSM4; U6 snRNA-associated Sm-like protein LSm4	map03018 RNA degradation; map03040 Spliceosome	GO:0000245 spliceosomal complex assembly; GO:0000375 RNA splicing, via transesterification reactions; GO:0000377 RNA splicing, via transesterification reactions with bulged adenosine as nucleophile; GO:0000387 spliceosomal snRNP assembly; GO:0000398 mRNA splicing, via spliceosome; GO:0000956 nuclear-transcribed mRNA catabolic process; GO:0006139 nucleobase-containing compound metabolic process; G…	GO:0000932 P-body; GO:0005622 intracellular; GO:0005623 cell; GO:0005634 nucleus; GO:0005688 U6 snRNP; GO:0005737 cytoplasm; GO:0030532 small nuclear ribonucleoprotein complex; GO:0032991 protein-containing complex; GO:0035770 ribonucleoprotein granule; GO:0036464 cytoplasmic ribonucleoprotein granule; GO:0043226 organelle; GO:0043227 membrane-bounded organelle; GO:0043228 non-membrane-bounded or…	GO:0003676 nucleic acid binding; GO:0003723 RNA binding; GO:0005488 binding; GO:0017069 snRNA binding; GO:0017070 U6 snRNA binding; GO:0097159 organic cyclic compound binding; GO:1901363 heterocyclic compound binding;	PF01423	LSM domain	A	KOG3293	Small nuclear ribonucleoprotein (snRNP)
A0A2G3A695	Polygalacturonase QRT3 OS=Capsicum annuum OX=4072 GN=T459_04865 PE=4 SV=1	T459_04865	0.69	3.62927e-05	Down	52.6	0.809	0.839	0.795	1.2	1.182	1.161	1.004	1.001	0.995	0.999	1	1.006	1.542	1.524	1.414	0.524	0.528	0.495	vacuolar membrane				GO:0000003 reproduction; GO:0003006 developmental process involved in reproduction; GO:0007049 cell cycle; GO:0007275 multicellular organism development; GO:0009555 pollen development; GO:0009556 microsporogenesis; GO:0009653 anatomical structure morphogenesis; GO:0009987 cellular process; GO:0010208 pollen wall assembly; GO:0010584 pollen exine formation; GO:0010927 cellular component assembly i…		GO:0003824 catalytic activity; GO:0004553 hydrolase activity, hydrolyzing O-glycosyl compounds; GO:0004650 polygalacturonase activity; GO:0016787 hydrolase activity; GO:0016798 hydrolase activity, acting on glycosyl bonds;
A0A2G3A6H3	Protein NAP1 OS=Capsicum annuum OX=4072 GN=T459_04947 PE=4 SV=1	T459_04947	1.465	0.00326082	Up	156.2	1.144	1.263	1.161	0.896	0.789	0.751	0.969	0.897	0.975	1.097	1.031	1.036	1.037	0.892	0.889	0.986	1.048	1.155	nucleus	K05750	NCKAP1, NAP125; NCK-associated protein 1		GO:0000902 cell morphogenesis; GO:0000904 cell morphogenesis involved in differentiation; GO:0006355 regulation of transcription, DNA-templated; GO:0006996 organelle organization; GO:0007010 cytoskeleton organization; GO:0007015 actin filament organization; GO:0008064 regulation of actin polymerization or depolymerization; GO:0009653 anatomical structure morphogenesis; GO:0009825 multidimensional…	GO:0005622 intracellular; GO:0005623 cell; GO:0005634 nucleus; GO:0005737 cytoplasm; GO:0005783 endoplasmic reticulum; GO:0005789 endoplasmic reticulum membrane; GO:0012505 endomembrane system; GO:0016020 membrane; GO:0031209 SCAR complex; GO:0031984 organelle subcompartment; GO:0032991 protein-containing complex; GO:0042175 nuclear outer membrane-endoplasmic reticulum membrane network; GO:004322…				S	KOG1917	Membrane-associated hematopoietic protein
A0A1U8EJ03	protein GPR107-like(predicted) OS=Capsicum annuum OX=4072 GN=T459_26002 PE=4 SV=1	T459_26002	1.35	0.0125398	Up	49.5	1.146	1.197	1.107	0.89	0.922	0.743	0.887	0.977	0.884	1.114	1.101	1.041	0.976	1.123	1.018	1.006	0.904	0.984	plasma membrane	K22985	GPR107; G protein-coupled receptor 107		GO:0006810 transport; GO:0006897 endocytosis; GO:0006898 receptor-mediated endocytosis; GO:0016192 vesicle-mediated transport; GO:0051179 localization; GO:0051234 establishment of localization; GO:0072583 clathrin-dependent endocytosis; GO:0098657 import into cell;	GO:0005622 intracellular; GO:0005623 cell; GO:0005634 nucleus; GO:0005654 nucleoplasm; GO:0005737 cytoplasm; GO:0005768 endosome; GO:0005769 early endosome; GO:0005794 Golgi apparatus; GO:0012505 endomembrane system; GO:0030135 coated vesicle; GO:0030136 clathrin-coated vesicle; GO:0031410 cytoplasmic vesicle; GO:0031974 membrane-enclosed lumen; GO:0031981 nuclear lumen; GO:0031982 vesicle; GO:00…	GO:0005488 binding; GO:0005515 protein binding; GO:0030276 clathrin binding; GO:0032050 clathrin heavy chain binding;			T	KOG2569	G protein-coupled seven transmembrane receptor
A0A2G2ZQT3	Protein AUXIN SIGNALING F-BOX 2 OS=Capsicum annuum OX=4072 GN=T459_12764 PE=4 SV=1	T459_12764	1.302	6.5241e-05	Up	53.3	1.147	1.129	1.107	0.875	0.877	0.847	0.898	0.961	0.95	1.028	1.079	1.007	0.864	0.883	0.875	1.146	1.18	1.112	cytoplasm				GO:0007154 cell communication; GO:0007165 signal transduction; GO:0009719 response to endogenous stimulus; GO:0009725 response to hormone; GO:0009733 response to auxin; GO:0009734 auxin-activated signaling pathway; GO:0009755 hormone-mediated signaling pathway; GO:0009987 cellular process; GO:0010033 response to organic substance; GO:0023052 signaling; GO:0032870 cellular response to hormone stim…	GO:0000151 ubiquitin ligase complex; GO:0005622 intracellular; GO:0005623 cell; GO:0019005 SCF ubiquitin ligase complex; GO:0031461 cullin-RING ubiquitin ligase complex; GO:0032991 protein-containing complex; GO:1902494 catalytic complex; GO:1990234 transferase complex;	GO:0000822 inositol hexakisphosphate binding; GO:0005488 binding; GO:0008144 drug binding; GO:0010011 auxin binding; GO:0036094 small molecule binding; GO:0042562 hormone binding; GO:0043167 ion binding; GO:0043168 anion binding; GO:0043178 alcohol binding;			S	KOG1947	Leucine rich repeat proteins, some proteins contain F-box
A0A2G2YBW1	Putative ovule protein(predicted) OS=Capsicum annuum OX=4072 GN=T459_31466 PE=4 SV=1	T459_31466	0.604	5.67465e-05	Down	17.3	0.763	0.768	0.721	1.22	1.292	1.216	0.874	0.91	0.819	1.136	1.098	1.134	1.03	1.064	1.042	0.968	0.948	0.972	vacuolar membrane
A0A2G2YB30	SMK-1 domain-containing protein OS=Capsicum annuum OX=4072 GN=T459_31387 PE=4 SV=1	T459_31387	1.433	0.0255682	Up	93.1	1.11	1.343	1.085	0.831	0.93	0.708	0.836	0.895	0.973	1.001	1.138	1.159	0.838	0.749	1.027	1.159	1.259	0.97	cytoplasm	K17491	SMEK, PPP4R3; protein phosphatase 4 regulatory subunit 3							G	KOG2175	Protein predicted to be involved in carbohydrate metabolism
A0A2G2ZKJ8	60S ribosomal protein L35 OS=Capsicum annuum OX=4072 GN=T459_15476 PE=3 SV=1	T459_15476	1.497	6.61266e-06	Up	21.4	1.231	1.186	1.189	0.795	0.809	0.805	1.001	1.035	0.938	1.049	0.971	0.998	1.057	1.032	1.008	0.964	0.969	0.956	cytoplasm	K02918	RP-L35e, RPL35; large subunit ribosomal protein L35e	map03010 Ribosome	GO:0000463 maturation of LSU-rRNA from tricistronic rRNA transcript (SSU-rRNA, 5.8S rRNA, LSU-rRNA); GO:0000470 maturation of LSU-rRNA; GO:0006139 nucleobase-containing compound metabolic process; GO:0006364 rRNA processing; GO:0006396 RNA processing; GO:0006412 translation; GO:0006518 peptide metabolic process; GO:0006725 cellular aromatic compound metabolic process; GO:0006807 nitrogen compound…	GO:0005622 intracellular; GO:0005623 cell; GO:0005634 nucleus; GO:0005730 nucleolus; GO:0005737 cytoplasm; GO:0005829 cytosol; GO:0005840 ribosome; GO:0005911 cell-cell junction; GO:0009506 plasmodesma; GO:0015934 large ribosomal subunit; GO:0022625 cytosolic large ribosomal subunit; GO:0022626 cytosolic ribosome; GO:0030054 cell junction; GO:0031974 membrane-enclosed lumen; GO:0031981 nuclear lu…	GO:0003676 nucleic acid binding; GO:0003723 RNA binding; GO:0003729 mRNA binding; GO:0003735 structural constituent of ribosome; GO:0005198 structural molecule activity; GO:0005488 binding; GO:0097159 organic cyclic compound binding; GO:1901363 heterocyclic compound binding;			J	KOG3436	60S ribosomal protein L35
A0A2G3AJR1	Ribosomal protein L15 OS=Capsicum annuum OX=4072 GN=T459_02341 PE=3 SV=1	T459_02341	1.388	0.000212334	Up	28.1	1.147	1.203	1.14	0.869	0.83	0.815	0.995	1.068	0.978	0.989	1.008	0.97	0.96	1.029	0.936	1.04	1.007	1.035	nucleus	K02877	RP-L15e, RPL15; large subunit ribosomal protein L15e	map03010 Ribosome						J	KOG1678	60s ribosomal protein L15
A0A1U8GLT2	60S ribosomal protein L35-2 OS=Capsicum annuum OX=4072 GN=T459_13875 PE=3 SV=1	T459_13875	1.817	1.48839e-06	Up	14.2	1.309	1.285	1.279	0.714	0.722	0.695	1.054	0.972	1.102	0.949	0.876	1.055	1.083	1.123	1.094	0.862	0.91	0.94	nucleus	K02918	RP-L35e, RPL35; large subunit ribosomal protein L35e	map03010 Ribosome	GO:0000463 maturation of LSU-rRNA from tricistronic rRNA transcript (SSU-rRNA, 5.8S rRNA, LSU-rRNA); GO:0000470 maturation of LSU-rRNA; GO:0006139 nucleobase-containing compound metabolic process; GO:0006364 rRNA processing; GO:0006396 RNA processing; GO:0006412 translation; GO:0006518 peptide metabolic process; GO:0006725 cellular aromatic compound metabolic process; GO:0006807 nitrogen compound…	GO:0005622 intracellular; GO:0005623 cell; GO:0005634 nucleus; GO:0005730 nucleolus; GO:0005737 cytoplasm; GO:0005829 cytosol; GO:0005840 ribosome; GO:0005911 cell-cell junction; GO:0009506 plasmodesma; GO:0015934 large ribosomal subunit; GO:0022625 cytosolic large ribosomal subunit; GO:0022626 cytosolic ribosome; GO:0030054 cell junction; GO:0031974 membrane-enclosed lumen; GO:0031981 nuclear lu…	GO:0003676 nucleic acid binding; GO:0003723 RNA binding; GO:0003729 mRNA binding; GO:0003735 structural constituent of ribosome; GO:0005198 structural molecule activity; GO:0005488 binding; GO:0097159 organic cyclic compound binding; GO:1901363 heterocyclic compound binding;			J	KOG3436	60S ribosomal protein L35
A0A2G2YSL4	UBA_e1_C domain-containing protein OS=Capsicum annuum OX=4072 GN=T459_23508 PE=4 SV=1	T459_23508	1.341	0.000878467	Up	21.8	1.186	1.094	1.168	0.821	0.882	0.868	0.929	0.934	1	1.08	1.054	1.042	0.868	0.94	0.805	1.122	1.124	1.15	cytoplasm	K03178	UBE1, UBA1; ubiquitin-activating enzyme E1 [EC:6.2.1.45]	map04120 Ubiquitin mediated proteolysis				PF10585; PF00899; PF09358	Ubiquitin-activating enzyme active site ; ThiF family; Ubiquitin-activating enzyme e1 C-terminal domain	O	KOG2012	Ubiquitin activating enzyme UBA1
A0A2G3A783	Lipase_GDSL domain-containing protein OS=Capsicum annuum OX=4072 GN=T459_05205 PE=3 SV=1	T459_05205	1.306	9.91726e-05	Up	41.3	1.115	1.125	1.137	0.888	0.858	0.84													extracellular
A0A1U8GNK6	Mitochondrial ATP synthase 6kDa subunit(predicted) OS=Capsicum annuum OX=4072 GN=T459_12189 PE=4 SV=1	T459_12189	0.721	0.000247834	Down	6.7	0.832	0.834	0.85	1.189	1.105	1.197													cytoplasm					GO:0005622 intracellular; GO:0005623 cell; GO:0005737 cytoplasm; GO:0005739 mitochondrion; GO:0005740 mitochondrial envelope; GO:0005743 mitochondrial inner membrane; GO:0016020 membrane; GO:0019866 organelle inner membrane; GO:0031090 organelle membrane; GO:0031966 mitochondrial membrane; GO:0031967 organelle envelope; GO:0031975 envelope; GO:0043226 organelle; GO:0043227 membrane-bounded organe…
A0A1U8HBE5	Callose synthase 12 OS=Capsicum annuum OX=4072 GN=T459_20174 PE=4 SV=1	T459_20174	1.311	6.20532e-05	Up	205.9	1.131	1.087	1.13	0.845	0.843	0.865	0.932	0.933	0.932	1.084	1.062	1.068	0.938	0.976	0.991	0.958	1.038	1.069	plasma membrane	K11000	CALS; callose synthase [EC:2.4.1.-]		GO:0000003 reproduction; GO:0001101 response to acid chemical; GO:0002218 activation of innate immune response; GO:0002253 activation of immune response; GO:0002376 immune system process; GO:0002682 regulation of immune system process; GO:0002684 positive regulation of immune system process; GO:0006950 response to stress; GO:0006952 defense response; GO:0007154 cell communication; GO:0007165 sign…	GO:0005622 intracellular; GO:0005623 cell; GO:0005737 cytoplasm; GO:0005794 Golgi apparatus; GO:0005886 plasma membrane; GO:0005911 cell-cell junction; GO:0009506 plasmodesma; GO:0012505 endomembrane system; GO:0016020 membrane; GO:0030054 cell junction; GO:0043226 organelle; GO:0043227 membrane-bounded organelle; GO:0043229 intracellular organelle; GO:0043231 intracellular membrane-bounded organ…				M	KOG0916	1,3-beta-glucan synthase/callose synthase catalytic subunit
A0A1U8F3K5	Ankyrin repeat-containing protein OS=Capsicum annuum OX=4072 GN=T459_31197 PE=4 SV=1	T459_31197	1.502	0.00650538	Up	63.5	1.104	1.212	1.288	0.828	0.869	0.702	1.023	0.988	1.06	0.84	1.131	0.964							plasma membrane					GO:0005622 intracellular; GO:0005623 cell; GO:0005737 cytoplasm; GO:0005783 endoplasmic reticulum; GO:0005886 plasma membrane; GO:0012505 endomembrane system; GO:0016020 membrane; GO:0043226 organelle; GO:0043227 membrane-bounded organelle; GO:0043229 intracellular organelle; GO:0043231 intracellular membrane-bounded organelle; GO:0071944 cell periphery;		PF13962	Domain of unknown function	S	KOG0504	FOG: Ankyrin repeat
A0A1U8FJW5	Putative ovule protein(predicted) OS=Capsicum annuum OX=4072 GN=T459_05332 PE=4 SV=1	T459_05332	0.73	0.000615364	Down	32.1	0.883	0.813	0.849	1.156	1.122	1.209	0.823	0.932	1.014	1.091	1.076	1.064	1.185	1.034	0.947	0.951	1.077	0.872	chloroplast
A0A2G2YXE3	Glyoxysomal fatty acid beta-oxidation multifunctional protein MFP-a OS=Capsicum annuum OX=4072 GN=T459_21691 PE=4 SV=1	T459_21691	1.466	0.00143542	Up	101.7	1.215	1.166	1.126	0.811	0.849	0.732	1.055	1.144	0.985	0.93	0.943	0.952							plasma membrane	K10527	MFP2; enoyl-CoA hydratase/3-hydroxyacyl-CoA dehydrogenase [EC:4.2.1.17 1.1.1.35 1.1.1.211]	map00071 Fatty acid degradation; map00592 alpha-Linolenic acid metabolism; map01100 Metabolic pathways; map01110 Biosynthesis of secondary metabolites; map01212 Fatty acid metabolism	GO:0006082 organic acid metabolic process; GO:0006629 lipid metabolic process; GO:0006631 fatty acid metabolic process; GO:0006635 fatty acid beta-oxidation; GO:0008152 metabolic process; GO:0009056 catabolic process; GO:0009062 fatty acid catabolic process; GO:0009987 cellular process; GO:0016042 lipid catabolic process; GO:0016054 organic acid catabolic process; GO:0019395 fatty acid oxidation;…	GO:0005622 intracellular; GO:0005623 cell; GO:0005737 cytoplasm; GO:0005777 peroxisome; GO:0042579 microbody; GO:0043226 organelle; GO:0043227 membrane-bounded organelle; GO:0043229 intracellular organelle; GO:0043231 intracellular membrane-bounded organelle;	GO:0003676 nucleic acid binding; GO:0003723 RNA binding; GO:0003729 mRNA binding; GO:0003824 catalytic activity; GO:0003857 3-hydroxyacyl-CoA dehydrogenase activity; GO:0004165 dodecenoyl-CoA delta-isomerase activity; GO:0004300 enoyl-CoA hydratase activity; GO:0005488 binding; GO:0005515 protein binding; GO:0008017 microtubule binding; GO:0008092 cytoskeletal protein binding; GO:0008692 3-hydrox…	PF00378; PF02737; PF00725	Enoyl-CoA hydratase/isomerase family; 3-hydroxyacyl-CoA dehydrogenase, NAD binding domain; 3-hydroxyacyl-CoA dehydrogenase, C-terminal domain	I	KOG1683	Hydroxyacyl-CoA dehydrogenase/enoyl-CoA hydratase
A0A1U8GW55	serine/threonine-protein phosphatase 6 regulatory subunit 3-like isoform X1(predicted) OS=Capsicum annuum OX=4072 GN=T459_16736 PE=4 SV=1	T459_16736	1.366	0.00595979	Up	94.4	1.211	1.08	1.176	0.861	0.906	0.771	1.037	1.098	0.978	0.926	0.97	1.02	0.937	1.065	0.988	0.986	1.034	0.998	chloroplast	K15501	PPP6R3, SAPS3; serine/threonine-protein phosphatase 6 regulatory subunit 3							D	KOG2073	SAP family cell cycle dependent phosphatase-associated protein
A0A1U8DRZ6	Aminopeptidase OS=Capsicum annuum OX=4072 GN=T459_21592 PE=3 SV=1	T459_21592	1.304	0.000574674	Up	99.1	1.084	1.173	1.127	0.857	0.889	0.85	0.957	0.96	0.982	1.049	1.059	1.036	0.812	0.821	0.807	1.216	1.187	1.164	cytoplasm	K08776	NPEPPS; puromycin-sensitive aminopeptidase [EC:3.4.11.-]		GO:0001666 response to hypoxia; GO:0006508 proteolysis; GO:0006518 peptide metabolic process; GO:0006807 nitrogen compound metabolic process; GO:0006810 transport; GO:0006950 response to stress; GO:0008152 metabolic process; GO:0009056 catabolic process; GO:0009628 response to abiotic stimulus; GO:0009914 hormone transport; GO:0009926 auxin polar transport; GO:0009987 cellular process; GO:0010817…	GO:0005622 intracellular; GO:0005623 cell; GO:0005737 cytoplasm; GO:0005829 cytosol; GO:0005886 plasma membrane; GO:0016020 membrane; GO:0031090 organelle membrane; GO:0043226 organelle; GO:0043227 membrane-bounded organelle; GO:0071944 cell periphery;	GO:0003824 catalytic activity; GO:0004177 aminopeptidase activity; GO:0005488 binding; GO:0008144 drug binding; GO:0008233 peptidase activity; GO:0008235 metalloexopeptidase activity; GO:0008237 metallopeptidase activity; GO:0008238 exopeptidase activity; GO:0008270 zinc ion binding; GO:0010013 N-1-naphthylphthalamic acid binding; GO:0016787 hydrolase activity; GO:0031406 carboxylic acid binding;…	PF01433; PF11838	Peptidase family M1; Domain of unknown function (DUF3358)	EO	KOG1046	Puromycin-sensitive aminopeptidase and related aminopeptidases
A0A2G2Z8R3	DEAD-box ATP-dependent RNA helicase 7 OS=Capsicum annuum OX=4072 GN=T459_16411 PE=4 SV=1	T459_16411	1.411	0.000245768	Up	74.1	1.177	1.114	1.201	0.852	0.812	0.81	0.991	1.058	1.008	0.994	0.923	0.951	0.923	0.821	0.909	1.164	1.104	1.122	chloroplast	K16911	DDX21; ATP-dependent RNA helicase DDX21 [EC:3.6.4.13]		GO:0006139 nucleobase-containing compound metabolic process; GO:0006725 cellular aromatic compound metabolic process; GO:0006807 nitrogen compound metabolic process; GO:0008152 metabolic process; GO:0009987 cellular process; GO:0010501 RNA secondary structure unwinding; GO:0016070 RNA metabolic process; GO:0034641 cellular nitrogen compound metabolic process; GO:0043170 macromolecule metabolic pr…	GO:0005622 intracellular; GO:0005623 cell; GO:0005634 nucleus; GO:0005730 nucleolus; GO:0005737 cytoplasm; GO:0031974 membrane-enclosed lumen; GO:0031981 nuclear lumen; GO:0043226 organelle; GO:0043227 membrane-bounded organelle; GO:0043228 non-membrane-bounded organelle; GO:0043229 intracellular organelle; GO:0043231 intracellular membrane-bounded organelle; GO:0043232 intracellular non-membrane…	GO:0003724 RNA helicase activity; GO:0003824 catalytic activity; GO:0004386 helicase activity; GO:0005488 binding; GO:0005515 protein binding; GO:0008186 RNA-dependent ATPase activity; GO:0016462 pyrophosphatase activity; GO:0016787 hydrolase activity; GO:0016817 hydrolase activity, acting on acid anhydrides; GO:0016818 hydrolase activity, acting on acid anhydrides, in phosphorus-containing anhyd…	PF00270; PF08152	DEAD/DEAH box helicase; GUCT (NUC152) domain	A	KOG0331	ATP-dependent RNA helicase
A0A2G3AGD2	Polyphenol oxidase F, chloroplastic OS=Capsicum annuum OX=4072 GN=T459_01178 PE=4 SV=1	T459_01178	1.326	5.84422e-06	Up	66	1.143	1.155	1.141	0.852	0.876	0.865	1.141	1.12	1.083	0.878	0.918	0.872	1.182	1.158	1.137	0.86	0.843	0.856	chloroplast	K00422	E1.10.3.1; polyphenol oxidase [EC:1.10.3.1]	map00350 Tyrosine metabolism; map00950 Isoquinoline alkaloid biosynthesis; map01100 Metabolic pathways; map01110 Biosynthesis of secondary metabolites		GO:0005622 intracellular; GO:0005623 cell; GO:0005737 cytoplasm; GO:0009507 chloroplast; GO:0009534 chloroplast thylakoid; GO:0009536 plastid; GO:0009543 chloroplast thylakoid lumen; GO:0009579 thylakoid; GO:0031976 plastid thylakoid; GO:0031977 thylakoid lumen; GO:0031978 plastid thylakoid lumen; GO:0031984 organelle subcompartment; GO:0043226 organelle; GO:0043227 membrane-bounded organelle; GO…		PF00264; PF12142; PF12143	Common central domain of tyrosinase; Polyphenol oxidase middle domain; Protein of unknown function (DUF_B2219)
A0A2G3AAI9	Putative nucleolar protein 6-like(predicted) OS=Capsicum annuum OX=4072 GN=T459_06333 PE=3 SV=1	T459_06333	1.444	0.013586	Up	91.5	1.174	1.319	1.055	0.742	0.908	0.807													nucleus	K14544	UTP22, NOL6; U3 small nucleolar RNA-associated protein 22	map03008 Ribosome biogenesis in eukaryotes						J	KOG2054	Nucleolar RNA-associated protein (NRAP)
A0A2G2Y0T5	AAA domain-containing protein OS=Capsicum annuum OX=4072 GN=T459_32717 PE=3 SV=1	T459_32717	1.435	0.000276491	Up	163.6	1.232	1.142	1.165	0.852	0.818	0.796													nucleus	K13459	RPS2; disease resistance protein RPS2	map04626 Plant-pathogen interaction				PF00931	NB-ARC domain	T	KOG4658	Apoptotic ATPase
A0A2G2ZS78	Zinc-finger homeodomain protein 6 OS=Capsicum annuum OX=4072 GN=T459_13275 PE=4 SV=1	T459_13275	0.727	0.000344993	Down	29	0.84	0.863	0.792	1.124	1.138	1.172	0.9	0.915	0.938	1.099	1.048	1.103							nucleus
A0A2G2XY78	GUB_WAK_bind domain-containing protein OS=Capsicum annuum OX=4072 GN=T459_33685 PE=4 SV=1	T459_33685	0.688	0.00171625	Down	22.8	0.854	0.849	0.745	1.14	1.184	1.236													extracellular				GO:0006464 cellular protein modification process; GO:0006468 protein phosphorylation; GO:0006793 phosphorus metabolic process; GO:0006796 phosphate-containing compound metabolic process; GO:0006807 nitrogen compound metabolic process; GO:0007154 cell communication; GO:0007165 signal transduction; GO:0007166 cell surface receptor signaling pathway; GO:0008152 metabolic process; GO:0009987 cellular…	GO:0005623 cell; GO:0005886 plasma membrane; GO:0016020 membrane; GO:0071944 cell periphery;	GO:0003824 catalytic activity; GO:0004672 protein kinase activity; GO:0004674 protein serine/threonine kinase activity; GO:0016301 kinase activity; GO:0016740 transferase activity; GO:0016772 transferase activity, transferring phosphorus-containing groups; GO:0016773 phosphotransferase activity, alcohol group as acceptor; GO:0140096 catalytic activity, acting on a protein;	PF13947	Wall-associated receptor kinase galacturonan-binding	T	KOG1187	Serine/threonine protein kinase
A0A2G2ZK09	major latex allergen Hev b 5-like(predicted) OS=Capsicum annuum OX=4072 GN=T459_15362 PE=4 SV=1	T459_15362	0.59	0.000753679	Down	18	0.803	0.694	0.691	1.221	1.183	1.304	0.954	0.968	0.953	1.076	0.999	1.054	1.012	1.05	1.004	1.01	0.973	0.943	cytoplasm
A0A2G2YCR2	putative late blight resistance protein homolog R1B-23(predicted) OS=Capsicum annuum OX=4072 GN=T459_27024 PE=3 SV=1	T459_27024	1.4	0.00281348	Up	105.1	1.172	1.072	1.204	0.77	0.877	0.815	0.919	0.917	1.009	1.011	1.007	1.098	0.853	0.872	0.934	1.083	1.059	1.132	cytoplasm							PF00931	NB-ARC domain	T	KOG4658	Apoptotic ATPase
A0A2G2YEW5	C2 domain-containing protein OS=Capsicum annuum OX=4072 GN=T459_27777 PE=4 SV=1	T459_27777	0.727	0.000406274	Down	18.1	0.846	0.833	0.849	1.13	1.122	1.227	0.825	0.811	0.818	1.112	1.082	1.35							cytoplasm							PF00168	C2 domain	S	KOG1030	Predicted Ca2+-dependent phospholipid-binding protein
A0A1U8E264	Histone acetyltransferase HAC12 OS=Capsicum annuum OX=4072 GN=T459_21170 PE=4 SV=1	T459_21170	1.467	0.0262031	Up	188.8	1.12	1.446	1.006	0.809	0.803	0.823													nucleus	K04498	EP300, CREBBP, KAT3; E1A/CREB-binding protein [EC:2.3.1.48]		GO:0000003 reproduction; GO:0003006 developmental process involved in reproduction; GO:0006325 chromatin organization; GO:0006464 cellular protein modification process; GO:0006473 protein acetylation; GO:0006475 internal protein amino acid acetylation; GO:0006807 nitrogen compound metabolic process; GO:0006996 organelle organization; GO:0007275 multicellular organism development; GO:0008152 metab…		GO:0003824 catalytic activity; GO:0004402 histone acetyltransferase activity; GO:0008080 N-acetyltransferase activity; GO:0016407 acetyltransferase activity; GO:0016410 N-acyltransferase activity; GO:0016740 transferase activity; GO:0016746 transferase activity, transferring acyl groups; GO:0016747 transferase activity, transferring acyl groups other than amino-acyl groups; GO:0034212 peptide N-a…	PF00628; PF08214; PF00569	PHD-finger; Histone acetylation protein; Zinc finger, ZZ type	K	KOG1778	CREB binding protein/P300 and related TAZ Zn-finger proteins
A0A2G2ZBI1	EMC1_C domain-containing protein (Fragment) OS=Capsicum annuum OX=4072 GN=T459_17410 PE=4 SV=1	T459_17410	1.328	0.000394702	Up	105.5	1.147	1.106	1.182	0.852	0.843	0.892	0.956	0.915	0.996	1.064	1.048	1.017	0.857	0.919	0.897	1.117	1.092	1.068	chloroplast	K23562	EMC1; ER membrane protein complex subunit 1					PF13360; PF07774	PQQ-like domain; Protein of unknown function (DUF1620)	S	KOG2103	Uncharacterized conserved protein
A0A2G2YEG3	Aldehyde dehydrogenase, mitochondrial OS=Capsicum annuum OX=4072 GN=T459_27612 PE=3 SV=1	T459_27612	0.515	7.14938e-06	Down	58.1	0.705	0.67	0.664	1.352	1.306	1.305	1.003	0.984	0.938	1.038	1.041	1.01	0.905	0.873	0.877	1.103	1.103	1.116	mitochondria	K00128	ALDH; aldehyde dehydrogenase (NAD+) [EC:1.2.1.3]	map00010 Glycolysis / Gluconeogenesis; map00053 Ascorbate and aldarate metabolism; map00071 Fatty acid degradation; map00280 Valine, leucine and isoleucine degradation; map00310 Lysine degradation; map00330 Arginine and proline metabolism; map00340 Histidine metabolism; map00380 Tryptophan metabolism; map00410 beta-Alanine metabolism; map00561 Glycerolipid metabolism; map00620 Pyruvate metabolism…	GO:0008152 metabolic process; GO:0055114 oxidation-reduction process;		GO:0003824 catalytic activity; GO:0004029 aldehyde dehydrogenase (NAD+) activity; GO:0016491 oxidoreductase activity; GO:0016620 oxidoreductase activity, acting on the aldehyde or oxo group of donors, NAD or NADP as acceptor; GO:0016903 oxidoreductase activity, acting on the aldehyde or oxo group of donors;			C	KOG2450	Aldehyde dehydrogenase
A0A2G2Z7S9	60S ribosomal protein L10 OS=Capsicum annuum OX=4072 GN=T459_15967 PE=4 SV=1	T459_15967	1.488	0.000925934	Up	34.7	1.139	1.194	1.257	0.758	0.799	0.856													nucleus	K02866	RP-L10e, RPL10; large subunit ribosomal protein L10e	map03010 Ribosome	GO:0000027 ribosomal large subunit assembly; GO:0002252 immune effector process; GO:0002376 immune system process; GO:0006412 translation; GO:0006518 peptide metabolic process; GO:0006807 nitrogen compound metabolic process; GO:0006950 response to stress; GO:0006952 defense response; GO:0006996 organelle organization; GO:0008152 metabolic process; GO:0009058 biosynthetic process; GO:0009059 macro…	GO:0005622 intracellular; GO:0005623 cell; GO:0005634 nucleus; GO:0005730 nucleolus; GO:0005737 cytoplasm; GO:0005773 vacuole; GO:0005774 vacuolar membrane; GO:0005829 cytosol; GO:0005840 ribosome; GO:0005844 polysome; GO:0009507 chloroplast; GO:0009526 plastid envelope; GO:0009536 plastid; GO:0009941 chloroplast envelope; GO:0015934 large ribosomal subunit; GO:0016020 membrane; GO:0022625 cytoso…	GO:0003676 nucleic acid binding; GO:0003723 RNA binding; GO:0003729 mRNA binding; GO:0003735 structural constituent of ribosome; GO:0005198 structural molecule activity; GO:0005488 binding; GO:0097159 organic cyclic compound binding; GO:1901363 heterocyclic compound binding;			J	KOG0857	60s ribosomal protein L10
A0A2G2XXE7	Germin-like protein OS=Capsicum annuum OX=4072 GN=T459_33926 PE=3 SV=1	T459_33926	1.31	0.000125879	Up	26	1.105	1.141	1.159	0.846	0.874	0.879													extracellular					GO:0005618 cell wall; GO:0005623 cell; GO:0030312 external encapsulating structure; GO:0071944 cell periphery;		PF00190	Cupin
A0A2G2YGU1	Ubiquitin carboxyl-terminal hydrolase 13 OS=Capsicum annuum OX=4072 GN=T459_28459 PE=4 SV=1	T459_28459	1.318	0.000240612	Up	45.9	1.114	1.176	1.123	0.843	0.86	0.886	0.926	0.93	0.896	1.14	1.058	1.056	0.835	0.876	0.796	1.13	1.14	1.227	nucleus	K11838	USP7, UBP15; ubiquitin carboxyl-terminal hydrolase 7 [EC:3.4.19.12]							O	KOG1863	Ubiquitin carboxyl-terminal hydrolase
A0A1U8FUR2	60S ribosomal protein L7-1 OS=Capsicum annuum OX=4072 GN=T459_10557 PE=4 SV=1	T459_10557	1.306	0.00269552	Up	28.6	1.141	1.053	1.206	0.877	0.855	0.871	1.072	0.906	1.014	0.955	1.013	1.047	0.889	0.985	0.951	1.079	1.061	1.041	cytoplasm	K02937	RP-L7e, RPL7; large subunit ribosomal protein L7e	map03010 Ribosome	GO:0000463 maturation of LSU-rRNA from tricistronic rRNA transcript (SSU-rRNA, 5.8S rRNA, LSU-rRNA); GO:0000470 maturation of LSU-rRNA; GO:0002181 cytoplasmic translation; GO:0006139 nucleobase-containing compound metabolic process; GO:0006364 rRNA processing; GO:0006396 RNA processing; GO:0006412 translation; GO:0006518 peptide metabolic process; GO:0006725 cellular aromatic compound metabolic p…	GO:0005622 intracellular; GO:0005623 cell; GO:0005634 nucleus; GO:0005730 nucleolus; GO:0005737 cytoplasm; GO:0005829 cytosol; GO:0005840 ribosome; GO:0015934 large ribosomal subunit; GO:0022625 cytosolic large ribosomal subunit; GO:0022626 cytosolic ribosome; GO:0031974 membrane-enclosed lumen; GO:0031981 nuclear lumen; GO:0032991 protein-containing complex; GO:0043226 organelle; GO:0043227 memb…	GO:0003676 nucleic acid binding; GO:0003723 RNA binding; GO:0003735 structural constituent of ribosome; GO:0005198 structural molecule activity; GO:0005488 binding; GO:0097159 organic cyclic compound binding; GO:1901363 heterocyclic compound binding;	PF08079; PF00327	Ribosomal L30 N-terminal domain; Ribosomal protein L30p/L7e	J	KOG3184	60S ribosomal protein L7
A0A1U8E0D5	Nuclear transcription factor Y subunit C-9 OS=Capsicum annuum OX=4072 GN=T459_02846 PE=4 SV=1	T459_02846	0.738	0.00599948	Down	28.4	0.804	0.828	0.917	1.064	1.223	1.169	0.923	0.934	0.959	1.02	1.103	1.065	1.08	1.015	1.088	0.941	0.914	0.971	nucleus	K08066	NFYC; nuclear transcription factor Y, gamma					PF00808	Histone-like transcription factor (CBF/NF-Y) and archaeal histone	B	KOG1657	CCAAT-binding factor, subunit C (HAP5)
A0A1U8EX11	Patatin OS=Capsicum annuum OX=4072 GN=T459_01134 PE=3 SV=1	T459_01134	0.768	2.53022e-05	Down	42.7	0.876	0.849	0.875	1.115	1.139	1.13	0.968	0.948	0.96	1.048	1.048	1.053	1.144	1.121	1.121	0.888	0.853	0.863	extracellular									G	KOG0513	Ca2+-independent phospholipase A2
A0A1U8HA04	Sucrose synthase OS=Capsicum annuum OX=4072 GN=T459_19440 PE=3 SV=1	T459_19440	1.319	0.00185095	Up	91.3	1.132	1.206	1.078	0.872	0.831	0.886	0.904	0.89	0.869	1.13	1.128	1.063	0.984	1.023	0.962	0.961	1.018	1.006	cytoplasm	K00695	E2.4.1.13; sucrose synthase [EC:2.4.1.13]	map00500 Starch and sucrose metabolism; map01100 Metabolic pathways	GO:0000003 reproduction; GO:0001101 response to acid chemical; GO:0001666 response to hypoxia; GO:0003006 developmental process involved in reproduction; GO:0006950 response to stress; GO:0006970 response to osmotic stress; GO:0007275 multicellular organism development; GO:0009266 response to temperature stimulus; GO:0009409 response to cold; GO:0009413 response to flooding; GO:0009414 response t…	GO:0005622 intracellular; GO:0005623 cell; GO:0005737 cytoplasm; GO:0005773 vacuole; GO:0005829 cytosol; GO:0005886 plasma membrane; GO:0005911 cell-cell junction; GO:0009506 plasmodesma; GO:0016020 membrane; GO:0030054 cell junction; GO:0043226 organelle; GO:0043227 membrane-bounded organelle; GO:0043229 intracellular organelle; GO:0043231 intracellular membrane-bounded organelle; GO:0055044 sym…	GO:0003824 catalytic activity; GO:0008194 UDP-glycosyltransferase activity; GO:0016157 sucrose synthase activity; GO:0016740 transferase activity; GO:0016757 transferase activity, transferring glycosyl groups; GO:0016758 transferase activity, transferring hexosyl groups; GO:0035251 UDP-glucosyltransferase activity; GO:0046527 glucosyltransferase activity;			M	KOG0853	Glycosyltransferase
A0A2G3AE94	subtilisin-like protease SBT1.2(predicted) OS=Capsicum annuum OX=4072 GN=T459_00426 PE=3 SV=1	T459_00426	0.702	0.00216942	Down	79	0.76	0.893	0.824	1.204	1.13	1.196	0.992	1.036	1.014	0.961	1.014	1.011	1.053	1.092	1.039	0.913	0.925	1.029	endoplasmic reticulum							PF05922; PF00082	Peptidase inhibitor I9; Subtilase family
A0A2G3AJ73	J domain-containing protein OS=Capsicum annuum OX=4072 GN=T459_02132 PE=4 SV=1	T459_02132	1.355	0.000945157	Up	83.3	1.16	1.189	1.107	0.866	0.804	0.88													nucleus	K09534	DNAJC14; DnaJ homolog subfamily C member 14					PF00226	DnaJ domain	O	KOG0720	Molecular chaperone (DnaJ superfamily)
A0A2G2XXC0	NAB domain-containing protein OS=Capsicum annuum OX=4072 GN=T459_34017 PE=4 SV=1	T459_34017	0.757	0.0381705	Down	160.3	0.978	0.865	0.746	1.127	1.049	1.244													nucleus					GO:0005622 intracellular; GO:0005623 cell; GO:0005634 nucleus; GO:0005886 plasma membrane; GO:0005911 cell-cell junction; GO:0009506 plasmodesma; GO:0016020 membrane; GO:0030054 cell junction; GO:0043226 organelle; GO:0043227 membrane-bounded organelle; GO:0043229 intracellular organelle; GO:0043231 intracellular membrane-bounded organelle; GO:0055044 symplast; GO:0071944 cell periphery;	GO:0003779 actin binding; GO:0005488 binding; GO:0005515 protein binding; GO:0008092 cytoskeletal protein binding; GO:0044877 protein-containing complex binding; GO:0051015 actin filament binding;
A0A2G3AD04	protein SMG9-like(predicted) OS=Capsicum annuum OX=4072 GN=T459_07176 PE=4 SV=1	T459_07176	0.752	0.00331345	Down	45.2	0.787	0.907	0.883	1.176	1.123	1.13	0.969	0.867	0.914	1.146	1.113	0.995	0.932	0.949	1.141	0.984	1.02	0.98	chloroplast	K18735	SMG9; protein SMG9							S	KOG4181	Uncharacterized conserved protein
A0A2G2YL63	transmembrane protein 87B-like isoform X2(predicted) OS=Capsicum annuum OX=4072 GN=T459_25596 PE=4 SV=1	T459_25596	1.37	0.00791485	Up	59.9	1.079	1.17	1.222	0.797	0.936	0.8	1.039	1.034	1.078	0.928	0.985	0.944							plasma membrane									S	KOG2568	Predicted membrane protein
A0A1U8FQH0	Alpha-mannosidase OS=Capsicum annuum OX=4072 GN=T459_06903 PE=3 SV=1	T459_06903	1.355	0.000742117	Up	131.9	1.146	1.2	1.076	0.829	0.851	0.845	0.972	0.945	0.99	1.078	1.031	1.006	0.889	0.886	0.842	1.141	1.138	1.098	chloroplast	K01231	MAN2; alpha-mannosidase II [EC:3.2.1.114]	map00510 N-Glycan biosynthesis; map00513 Various types of N-glycan biosynthesis; map01100 Metabolic pathways	GO:0005975 carbohydrate metabolic process; GO:0005996 monosaccharide metabolic process; GO:0006013 mannose metabolic process; GO:0006464 cellular protein modification process; GO:0006486 protein glycosylation; GO:0006487 protein N-linked glycosylation; GO:0006491 N-glycan processing; GO:0006517 protein deglycosylation; GO:0006807 nitrogen compound metabolic process; GO:0006950 response to stress;…	GO:0000139 Golgi membrane; GO:0005622 intracellular; GO:0005623 cell; GO:0005737 cytoplasm; GO:0005768 endosome; GO:0005794 Golgi apparatus; GO:0005802 trans-Golgi network; GO:0012505 endomembrane system; GO:0016020 membrane; GO:0031090 organelle membrane; GO:0031410 cytoplasmic vesicle; GO:0031982 vesicle; GO:0031984 organelle subcompartment; GO:0043226 organelle; GO:0043227 membrane-bounded org…	GO:0003824 catalytic activity; GO:0004553 hydrolase activity, hydrolyzing O-glycosyl compounds; GO:0004559 alpha-mannosidase activity; GO:0004572 mannosyl-oligosaccharide 1,3-1,6-alpha-mannosidase activity; GO:0015923 mannosidase activity; GO:0015924 mannosyl-oligosaccharide mannosidase activity; GO:0016787 hydrolase activity; GO:0016798 hydrolase activity, acting on glycosyl bonds;	PF01074; PF09261; PF07748	Glycosyl hydrolases family 38 N-terminal domain; Alpha mannosidase, middle domain; Glycosyl hydrolases family 38 C-terminal domain	G	KOG1959	Glycosyl hydrolase, family 38 - alpha-mannosidase
A0A2G2XZM1	Valine--tRNA ligase (Fragment) OS=Capsicum annuum OX=4072 GN=T459_33196 PE=3 SV=1	T459_33196	1.314	6.47018e-05	Up	122.5	1.124	1.142	1.137	0.838	0.872	0.88	0.94	0.904	0.965	1.07	1.081	1.047	0.853	0.837	0.81	1.18	1.135	1.166	cytoplasm	K01873	VARS, valS; valyl-tRNA synthetase [EC:6.1.1.9]	map00970 Aminoacyl-tRNA biosynthesis	GO:0000003 reproduction; GO:0003006 developmental process involved in reproduction; GO:0006082 organic acid metabolic process; GO:0006139 nucleobase-containing compound metabolic process; GO:0006399 tRNA metabolic process; GO:0006412 translation; GO:0006418 tRNA aminoacylation for protein translation; GO:0006438 valyl-tRNA aminoacylation; GO:0006518 peptide metabolic process; GO:0006520 cellular …	GO:0005622 intracellular; GO:0005623 cell; GO:0005737 cytoplasm; GO:0005739 mitochondrion; GO:0005829 cytosol; GO:0009507 chloroplast; GO:0009536 plastid; GO:0043226 organelle; GO:0043227 membrane-bounded organelle; GO:0043229 intracellular organelle; GO:0043231 intracellular membrane-bounded organelle;	GO:0003824 catalytic activity; GO:0004812 aminoacyl-tRNA ligase activity; GO:0004832 valine-tRNA ligase activity; GO:0016874 ligase activity; GO:0016875 ligase activity, forming carbon-oxygen bonds; GO:0140098 catalytic activity, acting on RNA; GO:0140101 catalytic activity, acting on a tRNA;	PF08264; PF10458	Anticodon-binding domain of tRNA; Valyl tRNA synthetase tRNA binding arm	J	KOG0432	Valyl-tRNA synthetase
A0A1U8GCP2	Plasmodesmata callose-binding protein 4 OS=Capsicum annuum OX=4072 GN=T459_02213 PE=4 SV=1	T459_02213	0.734	0.000483874	Down	20.2	0.887	0.853	0.803	1.167	1.139	1.158													extracellular	K22832	GAS1; 1,3-beta-glucanosyltransferase GAS1 [EC:2.4.1.-]			GO:0005623 cell; GO:0005886 plasma membrane; GO:0005911 cell-cell junction; GO:0009506 plasmodesma; GO:0016020 membrane; GO:0030054 cell junction; GO:0031224 intrinsic component of membrane; GO:0031225 anchored component of membrane; GO:0031226 intrinsic component of plasma membrane; GO:0046658 anchored component of plasma membrane; GO:0055044 symplast; GO:0071944 cell periphery;	GO:0001872 (1->3)-beta-D-glucan binding; GO:0003824 catalytic activity; GO:0004553 hydrolase activity, hydrolyzing O-glycosyl compounds; GO:0005488 binding; GO:0016787 hydrolase activity; GO:0016798 hydrolase activity, acting on glycosyl bonds; GO:0030246 carbohydrate binding; GO:0030247 polysaccharide binding;	PF07983	X8 domain

## Sheet: BY_SFvsKY_SF
Protein accession	Protein description	Gene name	BY_SF/KY_SF Ratio	BY_SF/KY_SF P value	Regulated Type	MW [kDa]	BY_JS_1	BY_JS_2	BY_JS_3	KY_JS_1	KY_JS_2	KY_JS_3	BY_SF_1	BY_SF_2	BY_SF_3	KY_SF_1	KY_SF_2	KY_SF_3	BY_SH_1	BY_SH_2	BY_SH_3	KY_SH_1	KY_SH_2	KY_SH_3	Subcellular localization	KEGG KO No.	KEGG Gene	KEGG pathway	Biological Process	Cellular Component	Molecular Function	Pfam ID	Domain description	KOG category	KOG NO.	KOG description
A0A2G2XWX4	Hexosyltransferase OS=Capsicum annuum OX=4072 GN=T459_34150 PE=3 SV=1	T459_34150	1.397	0.0334746	Up	60.1							0.952	1.287	1.264	0.886	0.824	0.798	1.054	1.096	0.943	0.967	0.969	0.981	plasma membrane	K22809	IPUT1; inositol phosphorylceramide glucuronosyltransferase 1 [EC:2.4.1.-]		GO:0000271 polysaccharide biosynthetic process; GO:0005975 carbohydrate metabolic process; GO:0005976 polysaccharide metabolic process; GO:0005977 glycogen metabolic process; GO:0005978 glycogen biosynthetic process; GO:0006073 cellular glucan metabolic process; GO:0006091 generation of precursor metabolites and energy; GO:0006112 energy reserve metabolic process; GO:0006629 lipid metabolic proce…	GO:0005622 intracellular; GO:0005623 cell; GO:0005737 cytoplasm; GO:0005768 endosome; GO:0005794 Golgi apparatus; GO:0005802 trans-Golgi network; GO:0012505 endomembrane system; GO:0016020 membrane; GO:0031410 cytoplasmic vesicle; GO:0031982 vesicle; GO:0031984 organelle subcompartment; GO:0043226 organelle; GO:0043227 membrane-bounded organelle; GO:0043229 intracellular organelle; GO:0043231 int…	GO:0003824 catalytic activity; GO:0005488 binding; GO:0005536 glucose binding; GO:0008194 UDP-glycosyltransferase activity; GO:0008466 glycogenin glucosyltransferase activity; GO:0015020 glucuronosyltransferase activity; GO:0016740 transferase activity; GO:0016757 transferase activity, transferring glycosyl groups; GO:0016758 transferase activity, transferring hexosyl groups; GO:0030246 carbohydr…			G	KOG1950	Glycosyl transferase, family 8 - glycogenin
A0A2G2XWX1	Serine protease inhibitor 1 OS=Capsicum annuum OX=4072 GN=T459_34352 PE=4 SV=1	T459_34352	1.602	5.58085e-05	Up	23.7	1.102	1.11	1.086	0.879	0.897	0.932	1.264	1.258	1.182	0.749	0.776	0.787	1.211	1.202	1.23	0.798	0.789	0.786	extracellular							PF00197	Trypsin and protease inhibitor
A0A1U8FIW0	Oxalate--CoA ligase OS=Capsicum annuum OX=4072 GN=T459_09338 PE=4 SV=1	T459_09338	0.768	0.00672639	Down	56.3	0.776	0.792	0.813	1.231	1.208	1.187	0.788	0.888	0.847	1.048	1.059	1.179	0.953	1.038	0.95	1.04	1.044	0.997	cytoplasm	K22133	AAE3; oxalate---CoA ligase [EC:6.2.1.8]	map00630 Glyoxylate and dicarboxylate metabolism; map01100 Metabolic pathways	GO:0000003 reproduction; GO:0003006 developmental process involved in reproduction; GO:0006082 organic acid metabolic process; GO:0006950 response to stress; GO:0006952 defense response; GO:0007275 multicellular organism development; GO:0008152 metabolic process; GO:0009056 catabolic process; GO:0009605 response to external stimulus; GO:0009607 response to biotic stimulus; GO:0009620 response to …	GO:0005576 extracellular region; GO:0005622 intracellular; GO:0005623 cell; GO:0005737 cytoplasm; GO:0005911 cell-cell junction; GO:0009506 plasmodesma; GO:0009507 chloroplast; GO:0009532 plastid stroma; GO:0009536 plastid; GO:0009570 chloroplast stroma; GO:0030054 cell junction; GO:0043226 organelle; GO:0043227 membrane-bounded organelle; GO:0043229 intracellular organelle; GO:0043231 intracellu…	GO:0003824 catalytic activity; GO:0016405 CoA-ligase activity; GO:0016874 ligase activity; GO:0016877 ligase activity, forming carbon-sulfur bonds; GO:0016878 acid-thiol ligase activity; GO:0050203 oxalate-CoA ligase activity;	PF13193	Domain of unknown function (DUF4009)	I	KOG1176	Acyl-CoA synthetase
A0A2G3ADB3	3-oxoacyl-[acyl-carrier-protein] synthase OS=Capsicum annuum OX=4072 GN=T459_00103 PE=3 SV=1	T459_00103	1.316	0.0252912	Up	43	0.96	0.928	0.952	1.018	0.984	1.164	1.274	1.041	1.102	0.789	0.867	0.94							cytoplasm	K09458	fabF, OXSM, CEM1; 3-oxoacyl-[acyl-carrier-protein] synthase II [EC:2.3.1.179]	map00061 Fatty acid biosynthesis; map00780 Biotin metabolism; map01100 Metabolic pathways; map01212 Fatty acid metabolism				PF00109; PF02801	Beta-ketoacyl synthase, N-terminal domain; Beta-ketoacyl synthase, C-terminal domain	IQ	KOG1394	3-oxoacyl-(acyl-carrier-protein) synthase (I and II)
A0A1U8GQ71	Zinc finger CCCH domain-containing protein 47 OS=Capsicum annuum OX=4072 GN=T459_15066 PE=4 SV=1	T459_15066	1.333	0.0199899	Up	75.7	0.965	0.941	1.079	1.002	1.071	1.118	1.115	1.016	1.302	0.879	0.823	0.874							nucleus									S	KOG1595	CCCH-type Zn-finger protein
A0A2G2YBE7	DEAD-box ATP-dependent RNA helicase 37 OS=Capsicum annuum OX=4072 GN=T459_31465 PE=4 SV=1	T459_31465	0.766	0.018424	Down	34.4	0.876	1.045	1.031	1.022	0.95	1.081	0.896	0.851	0.856	0.988	1.195	1.215	0.88	0.832	0.879	1.144	0.977	1.29	chloroplast	K11594	DDX3X, bel; ATP-dependent RNA helicase DDX3X [EC:3.6.4.13]		GO:0006139 nucleobase-containing compound metabolic process; GO:0006725 cellular aromatic compound metabolic process; GO:0006807 nitrogen compound metabolic process; GO:0008152 metabolic process; GO:0009987 cellular process; GO:0010501 RNA secondary structure unwinding; GO:0016070 RNA metabolic process; GO:0034641 cellular nitrogen compound metabolic process; GO:0043170 macromolecule metabolic pr…	GO:0005622 intracellular; GO:0005623 cell; GO:0005634 nucleus; GO:0005730 nucleolus; GO:0005737 cytoplasm; GO:0005777 peroxisome; GO:0005886 plasma membrane; GO:0016020 membrane; GO:0031974 membrane-enclosed lumen; GO:0031981 nuclear lumen; GO:0042579 microbody; GO:0043226 organelle; GO:0043227 membrane-bounded organelle; GO:0043228 non-membrane-bounded organelle; GO:0043229 intracellular organel…	GO:0003676 nucleic acid binding; GO:0003723 RNA binding; GO:0003724 RNA helicase activity; GO:0003729 mRNA binding; GO:0003824 catalytic activity; GO:0004386 helicase activity; GO:0005488 binding; GO:0008186 RNA-dependent ATPase activity; GO:0016462 pyrophosphatase activity; GO:0016787 hydrolase activity; GO:0016817 hydrolase activity, acting on acid anhydrides; GO:0016818 hydrolase activity, act…	PF00270	DEAD/DEAH box helicase	A	KOG0335	ATP-dependent RNA helicase
A0A2G2Z3M4	pentatricopeptide repeat-containing protein At2g20710, mitochondrial isoform X1(predicted) OS=Capsicum annuum OX=4072 GN=T459_20149 PE=4 SV=1	T459_20149	0.715	0.000315511	Down	44.8	1.045	1.03	1.026	1.027	0.976	0.902	0.875	0.806	0.821	1.147	1.201	1.151	0.826	0.912	0.748	1.15	1.178	1.113	cytoplasm				GO:0006139 nucleobase-containing compound metabolic process; GO:0006725 cellular aromatic compound metabolic process; GO:0006807 nitrogen compound metabolic process; GO:0008152 metabolic process; GO:0009451 RNA modification; GO:0009987 cellular process; GO:0016070 RNA metabolic process; GO:0034641 cellular nitrogen compound metabolic process; GO:0043170 macromolecule metabolic process; GO:0043412…	GO:0005622 intracellular; GO:0005623 cell; GO:0043226 organelle; GO:0043227 membrane-bounded organelle; GO:0043229 intracellular organelle; GO:0043231 intracellular membrane-bounded organelle;	GO:0003676 nucleic acid binding; GO:0003723 RNA binding; GO:0003824 catalytic activity; GO:0004518 nuclease activity; GO:0004519 endonuclease activity; GO:0005488 binding; GO:0016787 hydrolase activity; GO:0016788 hydrolase activity, acting on ester bonds; GO:0097159 organic cyclic compound binding; GO:1901363 heterocyclic compound binding;			S	KOG4197	FOG: PPR repeat
Q1W4A2	Xyloglucan endotransglucosylase/hydrolase OS=Capsicum annuum OX=4072 GN=T459_20400 PE=2 SV=1	T459_20400	1.407	0.0101648	Up	32.6							1.043	1.253	1.218	0.759	0.893	0.845							extracellular	K08235	E2.4.1.207; xyloglucan:xyloglucosyl transferase [EC:2.4.1.207]					PF00722	Glycosyl hydrolases family 16
Q2VT57	Cold-inducible protein OS=Capsicum annuum OX=4072 GN=T459_15194 PE=2 SV=1	T459_15194	1.469	0.00614061	Up	11.9	1.062	1.134	1.145	0.736	0.962	0.898	1.326	1.043	1.181	0.833	0.804	0.78	0.935	0.999	1.026	0.978	1.008	1.062	nucleus
A0A023JGD5	MAF1 OS=Capsicum annuum OX=4072 GN=T459_13043 PE=2 SV=1	T459_13043	1.334	0.00545248	Up	15.3	1.015	0.936	0.888	0.928	1.152	1.087	1.082	1.215	1.139	0.927	0.841	0.808	1.009	1.109	1.191	0.739	1.046	0.915	nucleus				GO:0000278 mitotic cell cycle; GO:0007049 cell cycle; GO:0007275 multicellular organism development; GO:0009791 post-embryonic development; GO:0009987 cellular process; GO:0022622 root system development; GO:0032501 multicellular organismal process; GO:0032502 developmental process; GO:0048364 root development; GO:0048527 lateral root development; GO:0048528 post-embryonic root development; GO:00…	GO:0005622 intracellular; GO:0005623 cell; GO:0005634 nucleus; GO:0005635 nuclear envelope; GO:0005640 nuclear outer membrane; GO:0005737 cytoplasm; GO:0005794 Golgi apparatus; GO:0005829 cytosol; GO:0005886 plasma membrane; GO:0012505 endomembrane system; GO:0016020 membrane; GO:0016363 nuclear matrix; GO:0019867 outer membrane; GO:0031090 organelle membrane; GO:0031965 nuclear membrane; GO:0031…		PF13943	WPP domain
A0A2G2ZM25	Protein CER1-like 2 OS=Capsicum annuum OX=4072 GN=T459_11480 PE=4 SV=1	T459_11480	0.703	0.000828669	Down	43.1	0.83	0.827	0.831	1.188	1.166	1.168	0.839	0.884	0.783	1.226	1.186	1.155	0.834	0.841	0.789	1.169	1.153	1.141	nucleus	K15404	K15404, CER1; aldehyde decarbonylase [EC:4.1.99.5]	map00073 Cutin, suberine and wax biosynthesis; map01110 Biosynthesis of secondary metabolites				PF12076	WAX2 C-terminal domain
A0A1U8E9M2	40S ribosomal protein S28 OS=Capsicum annuum OX=4072 GN=T459_32756 PE=3 SV=1	T459_32756	1.44	2.31824e-05	Up	7.5	1.059	0.997	1.055	0.934	1.002	0.958	1.209	1.185	1.155	0.806	0.828	0.83	1.186	1.138	1.172	0.82	0.797	0.901	cytoplasm	K02979	RP-S28e, RPS28; small subunit ribosomal protein S28e	map03010 Ribosome		GO:0005622 intracellular; GO:0005623 cell; GO:0005737 cytoplasm;				J	KOG3502	40S ribosomal protein S28
A0A2G2WVL9	Protein DETOXIFICATION(predicted) OS=Capsicum annuum OX=4072 GN=T459_24714 PE=4 SV=1	T459_24714	1.32	0.00261379	Up	12.2	1.099	1.086	1.11	0.92	0.92	0.87	1.19	1.169	1.063	0.828	0.893	0.871	1.057	1.099	1.113	0.933	0.911	0.898	chloroplast	K03327	TC.MATE, SLC47A, norM, mdtK, dinF; multidrug resistance protein, MATE family		GO:0002229 defense response to oomycetes; GO:0002239 response to oomycetes; GO:0006810 transport; GO:0006855 drug transmembrane transport; GO:0006950 response to stress; GO:0006952 defense response; GO:0009605 response to external stimulus; GO:0009607 response to biotic stimulus; GO:0009636 response to toxic substance; GO:0015893 drug transport; GO:0042221 response to chemical; GO:0042493 respons…		GO:0005215 transporter activity; GO:0022857 transmembrane transporter activity;			V	KOG1347	Uncharacterized membrane protein, predicted efflux pump
A0A2G3AED4	Putative ovule protein(predicted) OS=Capsicum annuum OX=4072 GN=T459_00488 PE=4 SV=1	T459_00488	1.313	0.0055096	Up	39.3	0.906	0.906	0.921	1.064	1.067	1.068	1.188	1.095	1.124	0.8	0.863	0.932	1.062	0.99	1.064	0.968	1	0.925	nucleus	K15622	MLF1; myeloid leukemia factor 1
A0A1U8F7V0	HD domain-containing protein 2 OS=Capsicum annuum OX=4072 GN=T459_33449 PE=4 SV=1	T459_33449	1.824	0.000130217	Up	26							1.349	1.315	1.222	0.718	0.741	0.672							chloroplast	K07023	K07023; putative hydrolases of HD superfamily					PF13023	HD domain	S	KOG3197	Predicted hydrolases of HD superfamily
A0A2G3AE11	Heat stress transcription factor B-2c OS=Capsicum annuum OX=4072 GN=T459_00353 PE=3 SV=1	T459_00353	1.349	0.0290674	Up	31.1	1.04	0.988	0.987	1.036	0.984	0.972	1.144	1.17	1.139	0.813	1.008	0.738							nucleus	K09419	HSFF; heat shock transcription factor, other eukaryote		GO:0006355 regulation of transcription, DNA-templated; GO:0009889 regulation of biosynthetic process; GO:0009890 negative regulation of biosynthetic process; GO:0009892 negative regulation of metabolic process; GO:0010033 response to organic substance; GO:0010200 response to chitin; GO:0010243 response to organonitrogen compound; GO:0010468 regulation of gene expression; GO:0010556 regulation of …		GO:0003700 DNA-binding transcription factor activity; GO:0140110 transcription regulator activity;	PF00447	HSF-type DNA-binding	K	KOG0627	Heat shock transcription factor
A0A1U8ENE5	Plasmodesmata callose-binding protein 4 OS=Capsicum annuum OX=4072 GN=T459_27179 PE=4 SV=1	T459_27179	1.775	5.95933e-05	Up	20.8	1.079	0.953	1.009	0.945	1.008	1.013	1.271	1.351	1.227	0.711	0.746	0.711	1.293	1.212	1.2	0.795	0.763	0.754	extracellular	K22832	GAS1; 1,3-beta-glucanosyltransferase GAS1 [EC:2.4.1.-]			GO:0005623 cell; GO:0005886 plasma membrane; GO:0005911 cell-cell junction; GO:0009506 plasmodesma; GO:0016020 membrane; GO:0030054 cell junction; GO:0031224 intrinsic component of membrane; GO:0031225 anchored component of membrane; GO:0031226 intrinsic component of plasma membrane; GO:0046658 anchored component of plasma membrane; GO:0055044 symplast; GO:0071944 cell periphery;	GO:0001872 (1->3)-beta-D-glucan binding; GO:0003824 catalytic activity; GO:0004553 hydrolase activity, hydrolyzing O-glycosyl compounds; GO:0005488 binding; GO:0016787 hydrolase activity; GO:0016798 hydrolase activity, acting on glycosyl bonds; GO:0030246 carbohydrate binding; GO:0030247 polysaccharide binding;	PF07983	X8 domain
A0A2G2ZHJ4	BURP domain-containing protein OS=Capsicum annuum OX=4072 GN=T459_14429 PE=4 SV=1	T459_14429	1.383	0.000353506	Up	45.9	1.02	1.029	1.01	0.945	1.021	0.975	1.205	1.15	1.142	0.811	0.879	0.838	1.09	1.061	1.147	0.945	0.902	0.889	vacuolar membrane
A0A2G3AHL9	pollen-specific leucine-rich repeat extensin-like protein 2 isoform X2(predicted) OS=Capsicum annuum OX=4072 GN=T459_01609 PE=4 SV=1	T459_01609	0.609	0.000101611	Down	37.3	0.828	0.802	0.829	1.197	1.181	1.17	0.757	0.766	0.748	1.315	1.181	1.233	1.225	1.2	1.146	0.816	0.843	0.785	extracellular
A0A2G3A3U5	Subtilisin-like protease SBT1.6 OS=Capsicum annuum OX=4072 GN=T459_11013 PE=3 SV=1	T459_11013	1.302	5.30828e-05	Up	81.9	0.985	1.021	1.039	1.057	0.988	0.905	1.159	1.136	1.116	0.861	0.889	0.869	1.131	1.128	1.102	0.862	0.857	0.868	extracellular							PF05922; PF00082	Peptidase inhibitor I9; Subtilase family
A0A2G3A8W4	Hydrolase_4 domain-containing protein OS=Capsicum annuum OX=4072 GN=T459_05799 PE=4 SV=1	T459_05799	1.929	4.49878e-06	Up	34.2	1.058	0.971	1.17	0.886	0.914	1.005	1.357	1.324	1.283	0.673	0.684	0.698	1.21	1.224	1.177	0.748	0.831	0.825	cytoplasm	K06889	K06889; uncharacterized protein							I	KOG4667	Predicted esterase
A0A2G2Z0Y7	Putative ovule protein(predicted) OS=Capsicum annuum OX=4072 GN=T459_19165 PE=4 SV=1	T459_19165	0.753	0.000292178	Down	66.1	1.043	1.054	0.997	1.043	0.974	0.946	0.874	0.887	0.822	1.13	1.149	1.15	0.848	0.973	0.852	1.177	1.08	1.107	nucleus
A0A2G3A016	Putative 6-phosphogluconolactonase 4, chloroplastic OS=Capsicum annuum OX=4072 GN=T459_09678 PE=4 SV=1	T459_09678	1.423	8.18261e-05	Up	36.2	1.139	1.114	1.146	0.866	0.837	0.902	1.209	1.17	1.136	0.804	0.835	0.831	1.208	1.106	1.173	0.812	0.833	0.767	mitochondria	K01057	PGLS, pgl, devB; 6-phosphogluconolactonase [EC:3.1.1.31]	map00030 Pentose phosphate pathway; map01100 Metabolic pathways; map01110 Biosynthesis of secondary metabolites; map01200 Carbon metabolism	GO:0002229 defense response to oomycetes; GO:0002239 response to oomycetes; GO:0006081 cellular aldehyde metabolic process; GO:0006082 organic acid metabolic process; GO:0006098 pentose-phosphate shunt; GO:0006139 nucleobase-containing compound metabolic process; GO:0006725 cellular aromatic compound metabolic process; GO:0006732 coenzyme metabolic process; GO:0006733 oxidoreduction coenzyme meta…	GO:0005622 intracellular; GO:0005623 cell; GO:0005737 cytoplasm; GO:0005773 vacuole; GO:0005774 vacuolar membrane; GO:0005777 peroxisome; GO:0005829 cytosol; GO:0009507 chloroplast; GO:0009532 plastid stroma; GO:0009536 plastid; GO:0009570 chloroplast stroma; GO:0016020 membrane; GO:0031090 organelle membrane; GO:0042579 microbody; GO:0043226 organelle; GO:0043227 membrane-bounded organelle; GO:0…	GO:0003824 catalytic activity; GO:0016787 hydrolase activity; GO:0016788 hydrolase activity, acting on ester bonds; GO:0017057 6-phosphogluconolactonase activity; GO:0052689 carboxylic ester hydrolase activity;	PF01182	Glucosamine-6-phosphate isomerases/6-phosphogluconolactonase	G	KOG3147	6-phosphogluconolactonase - like protein
A0A2G2Z1C5	WD-40 repeat-containing protein MSI4 OS=Capsicum annuum OX=4072 GN=T459_19310 PE=4 SV=1	T459_19310	0.754	0.000541161	Down	54.7	0.961	0.939	0.95	1.085	1.05	1.023	0.825	0.9	0.852	1.118	1.135	1.164	0.908	0.844	0.874	1.133	1.168	1.087	nucleus	K10752	RBBP4, HAT2, CAF1, MIS16; histone-binding protein RBBP4		GO:0006139 nucleobase-containing compound metabolic process; GO:0006259 DNA metabolic process; GO:0006281 DNA repair; GO:0006725 cellular aromatic compound metabolic process; GO:0006807 nitrogen compound metabolic process; GO:0006950 response to stress; GO:0006974 cellular response to DNA damage stimulus; GO:0008152 metabolic process; GO:0009314 response to radiation; GO:0009411 response to UV; G…	GO:0000151 ubiquitin ligase complex; GO:0005622 intracellular; GO:0005623 cell; GO:0005634 nucleus; GO:0005730 nucleolus; GO:0005737 cytoplasm; GO:0005829 cytosol; GO:0031461 cullin-RING ubiquitin ligase complex; GO:0031974 membrane-enclosed lumen; GO:0031981 nuclear lumen; GO:0032991 protein-containing complex; GO:0043226 organelle; GO:0043227 membrane-bounded organelle; GO:0043228 non-membrane-…	GO:0005488 binding; GO:0043167 ion binding; GO:0043169 cation binding; GO:0046872 metal ion binding;			B	KOG0264	Nucleosome remodeling factor, subunit CAF1/NURF55/MSI1
A0A2G3A7B6	Lipase_GDSL domain-containing protein OS=Capsicum annuum OX=4072 GN=T459_05204 PE=3 SV=1	T459_05204	1.303	8.05274e-06	Up	40.3	1.08	1.108	0.968	0.89	1.032	0.928	1.141	1.141	1.12	0.877	0.875	0.859	1.196	1.29	1.337	0.686	0.779	0.717	vacuolar membrane
A0A2G2ZDK5	60S acidic ribosomal protein P2 OS=Capsicum annuum OX=4072 GN=T459_18076 PE=3 SV=1	T459_18076	1.328	0.00456837	Up	18.1	1.025	1.063	0.957	0.975	0.973	1.014	1.076	1.184	1.192	0.931	0.841	0.828	1.05	1.047	1.049	0.948	0.966	0.949	chloroplast	K02943	RP-LP2, RPLP2; large subunit ribosomal protein LP2	map03010 Ribosome		GO:0005622 intracellular; GO:0005623 cell; GO:0005737 cytoplasm; GO:0005829 cytosol; GO:0005840 ribosome; GO:0015934 large ribosomal subunit; GO:0022625 cytosolic large ribosomal subunit; GO:0022626 cytosolic ribosome; GO:0032991 protein-containing complex; GO:0043226 organelle; GO:0043228 non-membrane-bounded organelle; GO:0043229 intracellular organelle; GO:0043232 intracellular non-membrane-bo…	GO:0003735 structural constituent of ribosome; GO:0005198 structural molecule activity; GO:0005488 binding; GO:0044877 protein-containing complex binding;			J	KOG3449	60S acidic ribosomal protein P2
A0A2G2YXM8	(+)-neomenthol dehydrogenase OS=Capsicum annuum OX=4072 GN=T459_21750 PE=3 SV=1	T459_21750	2.729	0.000101739	Up	32.9	0.881	1.04	1.151	0.758	1.072	1.099	1.44	1.596	1.372	0.489	0.559	0.567	1.432	1.393	1.367	0.616	0.613	0.601	chloroplast	K15095	E1.1.1.208; (+)-neomenthol dehydrogenase [EC:1.1.1.208]	map00902 Monoterpenoid biosynthesis; map01110 Biosynthesis of secondary metabolites				PF00106	short chain dehydrogenase	Q	KOG1208	Dehydrogenases with different specificities (related to short-chain alcohol dehydrogenases)
A0A1U8G2N6	Major allergen Pru ar 1 OS=Capsicum annuum OX=4072 GN=T459_10589 PE=3 SV=1	T459_10589	1.324	4.64792e-05	Up	17.6	1.07	1.032	0.972	1	0.937	0.993	1.132	1.14	1.146	0.84	0.858	0.883	1.271	1.322	1.234	0.702	0.716	0.734	cytoplasm							PF00407	Pathogenesis-related protein Bet v I family
A0A1U8EY62	Stress-response A/B barrel domain-containing protein OS=Capsicum annuum OX=4072 GN=T459_28640 PE=4 SV=1	T459_28640	1.434	9.53468e-06	Up	12.2	1.034	0.95	0.99	1.023	1	1.008	1.168	1.17	1.193	0.838	0.816	0.808	1.324	1.285	1.256	0.71	0.721	0.695	cytoplasm					GO:0005622 intracellular; GO:0005623 cell; GO:0005737 cytoplasm; GO:0009507 chloroplast; GO:0009536 plastid; GO:0043226 organelle; GO:0043227 membrane-bounded organelle; GO:0043229 intracellular organelle; GO:0043231 intracellular membrane-bounded organelle;		PF07876	Stress responsive A/B Barrel Domain
A0A2G2Z1J1	Elongation factor Ts, mitochondrial OS=Capsicum annuum OX=4072 GN=EFTS PE=3 SV=1	EFTS	1.509	0.00262408	Up	113.8	1.027	1.075	1.05	1.02	0.909	0.963	1.33	1.186	1.103	0.763	0.841	0.794	1.269	1.304	1.287	0.736	0.698	0.726	chloroplast	K02357	tsf, TSFM; elongation factor Ts					PF00575	S1 RNA binding domain	J	KOG1071	Mitochondrial translation elongation factor EF-Tsmt, catalyzes nucleotide exchange on EF-Tumt
A0A2G2YV08	nucleosome assembly protein 12-like(predicted) OS=Capsicum annuum OX=4072 GN=T459_24348 PE=3 SV=1	T459_24348	1.453	0.00188032	Up	41.8	0.946	0.897	0.854	1.064	1.128	1.118	1.181	1.292	1.09	0.811	0.802	0.839	1.61	1.486	1.292	0.616	0.464	0.558	cytoplasm	K11279	NAP1L1, NRP; nucleosome assembly protein 1-like 1		GO:0000724 double-strand break repair via homologous recombination; GO:0000725 recombinational repair; GO:0000730 DNA recombinase assembly; GO:0006139 nucleobase-containing compound metabolic process; GO:0006259 DNA metabolic process; GO:0006281 DNA repair; GO:0006302 double-strand break repair; GO:0006310 DNA recombination; GO:0006312 mitotic recombination; GO:0006725 cellular aromatic compound …		GO:0000150 recombinase activity; GO:0000217 DNA secondary structure binding; GO:0000400 four-way junction DNA binding; GO:0003676 nucleic acid binding; GO:0003677 DNA binding; GO:0003690 double-stranded DNA binding; GO:0003697 single-stranded DNA binding; GO:0003824 catalytic activity; GO:0005488 binding; GO:0008094 DNA-dependent ATPase activity; GO:0016462 pyrophosphatase activity; GO:0016787 hy…			BD	KOG1507	Nucleosome assembly protein NAP-1
A0A2G2ZSE8	Floral homeotic protein PMADS 1 OS=Capsicum annuum OX=4072 GN=T459_13327 PE=4 SV=1	T459_13327	0.738	0.00334695	Down	17.2	0.808	0.807	0.877	1.284	1.055	1.175	0.876	0.789	0.883	1.195	1.181	1.078	1.01	0.892	1.061	0.94	1.045	1.059	nucleus	K09264	K09264; MADS-box transcription factor, plant		GO:0000003 reproduction; GO:0003002 regionalization; GO:0003006 developmental process involved in reproduction; GO:0006355 regulation of transcription, DNA-templated; GO:0007275 multicellular organism development; GO:0007389 pattern specification process; GO:0009653 anatomical structure morphogenesis; GO:0009791 post-embryonic development; GO:0009889 regulation of biosynthetic process; GO:0009908…	GO:0005622 intracellular; GO:0005623 cell; GO:0005634 nucleus; GO:0043226 organelle; GO:0043227 membrane-bounded organelle; GO:0043229 intracellular organelle; GO:0043231 intracellular membrane-bounded organelle;	GO:0003700 DNA-binding transcription factor activity; GO:0140110 transcription regulator activity;	PF00319	SRF-type transcription factor (DNA-binding and dimerisation domain)	K	KOG0014	MADS box transcription factor
A0A1U8DSH7	Putative ovule protein(predicted) OS=Capsicum annuum OX=4072 GN=T459_21703 PE=4 SV=1	T459_21703	1.348	0.00106474	Up	52.2	1.153	1.048	1.092	0.901	0.92	0.857	1.203	1.121	1.128	0.819	0.898	0.844	1.16	1.239	0.954	0.916	0.875	0.871	plasma membrane
A0A2G2YMA8	Non-specific lipid-transfer protein OS=Capsicum annuum OX=4072 GN=T459_25939 PE=3 SV=1	T459_25939	0.651	0.000504019	Down	12.5	0.939	0.854	0.878	1.029	1.059	1.064	0.728	0.84	0.796	1.208	1.204	1.222							extracellular				GO:0006810 transport; GO:0006869 lipid transport; GO:0010876 lipid localization; GO:0033036 macromolecule localization; GO:0051179 localization; GO:0051234 establishment of localization; GO:0071702 organic substance transport;	GO:0016020 membrane;
A0A2G2Z1D1	3-hydroxyisobutyryl-CoA hydrolase-like protein 4, mitochondrial OS=Capsicum annuum OX=4072 GN=T459_19344 PE=3 SV=1	T459_19344	0.725	3.33796e-06	Down	41.4	0.812	0.799	0.822	1.207	1.218	1.166	0.841	0.862	0.84	1.165	1.168	1.175	0.874	0.826	0.892	1.13	1.132	1.166	cytoplasm	K05605	HIBCH; 3-hydroxyisobutyryl-CoA hydrolase [EC:3.1.2.4]	map00280 Valine, leucine and isoleucine degradation; map00410 beta-Alanine metabolism; map00640 Propanoate metabolism; map01100 Metabolic pathways; map01200 Carbon metabolism		GO:0005622 intracellular; GO:0005623 cell; GO:0005737 cytoplasm; GO:0005829 cytosol; GO:0016020 membrane;				I	KOG1684	Enoyl-CoA hydratase
A0A1U8GJD6	Gibberellin-regulated protein 10 OS=Capsicum annuum OX=4072 GN=T459_13021 PE=4 SV=1	T459_13021	0.718	0.00557038	Down	9.7	0.906	0.72	0.634	1.243	1.114	1.393	0.808	0.935	0.765	1.185	1.178	1.131	1.124	1.127	1.014	0.927	0.939	0.882	extracellular					GO:0005618 cell wall; GO:0005623 cell; GO:0030312 external encapsulating structure; GO:0071944 cell periphery;
A0A2G2ZK80	AB hydrolase-1 domain-containing protein OS=Capsicum annuum OX=4072 GN=T459_15401 PE=4 SV=1	T459_15401	1.414	0.00292901	Up	36.1	1.225	1.26	1.1	0.804	0.786	0.776	1.142	1.171	1.297	0.886	0.79	0.877	1.032	1.125	1.182	0.889	0.901	0.972	cytoplasm							PF12697	Alpha/beta hydrolase family	I	KOG4178	Soluble epoxide hydrolase
A0A2G2ZHC1	Glucan endo-1,3-beta-glucosidase 2 OS=Capsicum annuum OX=4072 GN=T459_14414 PE=3 SV=1	T459_14414	1.452	0.00127363	Up	54.1	0.861	0.886	0.877	1.165	1.06	1.158	1.253	1.091	1.217	0.827	0.788	0.837	1.08	1.064	1.31	0.828	0.889	0.84	endoplasmic reticulum	K19891	GN1_2_3; glucan endo-1,3-beta-glucosidase 1/2/3 [EC:3.2.1.39]	map00500 Starch and sucrose metabolism; map01100 Metabolic pathways				PF00332; PF07983	Glycosyl hydrolases family 17; X8 domain
A0A1U8EW68	25.3 kDa vesicle transport protein OS=Capsicum annuum OX=4072 GN=T459_33590 PE=3 SV=1	T459_33590	0.745	0.000498798	Down	25.4	1.037	1.048	1.064	0.928	0.976	0.952	0.866	0.888	0.842	1.171	1.11	1.205	0.954	1.01	0.926	1.036	1.038	1.043	nucleus	K08517	SEC22; vesicle transport protein SEC22	map04130 SNARE interactions in vesicular transport; map04145 Phagosome	GO:0006810 transport; GO:0006887 exocytosis; GO:0006906 vesicle fusion; GO:0006996 organelle organization; GO:0009987 cellular process; GO:0016043 cellular component organization; GO:0016050 vesicle organization; GO:0016192 vesicle-mediated transport; GO:0032940 secretion by cell; GO:0046903 secretion; GO:0048284 organelle fusion; GO:0051179 localization; GO:0051234 establishment of localization;…	GO:0005622 intracellular; GO:0005623 cell; GO:0005737 cytoplasm; GO:0005783 endoplasmic reticulum; GO:0005794 Golgi apparatus; GO:0005886 plasma membrane; GO:0012505 endomembrane system; GO:0016020 membrane; GO:0031201 SNARE complex; GO:0032991 protein-containing complex; GO:0043226 organelle; GO:0043227 membrane-bounded organelle; GO:0043229 intracellular organelle; GO:0043231 intracellular memb…	GO:0000149 SNARE binding; GO:0005484 SNAP receptor activity; GO:0005488 binding; GO:0005515 protein binding;	PF13774	Regulated-SNARE-like domain	U	KOG0862	Synaptobrevin/VAMP-like protein SEC22
A0A2G2ZCL8	60S ribosomal protein L17-1 OS=Capsicum annuum OX=4072 GN=T459_17780 PE=3 SV=1	T459_17780	0.656	0.000432911	Down	17.8	0.935	0.956	0.97	1.07	1.028	1.036	0.799	0.83	0.748	1.268	1.168	1.187	0.853	0.965	0.953	1.137	1.028	1.003	nucleus	K02880	RP-L17e, RPL17; large subunit ribosomal protein L17e	map03010 Ribosome	GO:0042592 homeostatic process; GO:0048872 homeostasis of number of cells; GO:0061484 hematopoietic stem cell homeostasis; GO:0065007 biological regulation; GO:0065008 regulation of biological quality;			PF00237	Ribosomal protein L22p/L17e	J	KOG3353	60S ribosomal protein L22
A0A1U8EDW6	Replication protein A 14 kDa subunit A OS=Capsicum annuum OX=4072 GN=T459_22409 PE=4 SV=1	T459_22409	1.303	1.22584e-05	Up	11.7	1.056	1.034	1.025	0.984	0.992	0.981	1.151	1.132	1.118	0.861	0.877	0.872	1.249	1.165	1.154	0.861	0.828	0.757	chloroplast	K10740	RPA3; replication factor A3	map03030 DNA replication; map03420 Nucleotide excision repair; map03430 Mismatch repair; map03440 Homologous recombination				PF08661	Replication factor A protein 3
A0A2G2Z4V8	Epidermis-specific secreted glycoprotein EP1 OS=Capsicum annuum OX=4072 GN=T459_20564 PE=4 SV=1	T459_20564	0.769	0.00348499	Down	33.5	0.952	0.991	1.02	1.06	0.956	1.026	0.835	0.85	0.923	1.13	1.074	1.189							extracellular				GO:0006810 transport; GO:0006833 water transport; GO:0042044 fluid transport; GO:0051179 localization; GO:0051234 establishment of localization;	GO:0005576 extracellular region; GO:0005618 cell wall; GO:0005622 intracellular; GO:0005623 cell; GO:0005737 cytoplasm; GO:0005773 vacuole; GO:0005774 vacuolar membrane; GO:0005794 Golgi apparatus; GO:0005829 cytosol; GO:0009505 plant-type cell wall; GO:0012505 endomembrane system; GO:0016020 membrane; GO:0030312 external encapsulating structure; GO:0031090 organelle membrane; GO:0043226 organell…		PF01453	D-mannose binding lectin
A0A2G3ADZ0	Osmotin-like protein OSML15 OS=Capsicum annuum OX=4072 GN=T459_00329 PE=4 SV=1	T459_00329	1.406	0.00525762	Up	20.4							1.141	1.235	1.095	0.749	0.893	0.827	1.284	1.226	1.193	0.737	0.762	0.814	nucleus				GO:0002376 immune system process; GO:0006950 response to stress; GO:0006952 defense response; GO:0006955 immune response; GO:0006970 response to osmotic stress; GO:0009605 response to external stimulus; GO:0009607 response to biotic stimulus; GO:0009617 response to bacterium; GO:0009620 response to fungus; GO:0009628 response to abiotic stimulus; GO:0009651 response to salt stress; GO:0009814 def…			PF00314	Thaumatin family
A0A1U8E1D6	PHD finger-like domain-containing protein 5A OS=Capsicum annuum OX=4072 GN=T459_24501 PE=4 SV=1	T459_24501	0.748	0.000220773	Down	12.4	0.921	0.879	0.896	1.106	1.051	1.185	0.873	0.847	0.847	1.192	1.124	1.118	0.816	0.824	0.829	1.246	1.182	1.107	cytoplasm	K12834	PHF5A; PHD finger-like domain-containing protein 5A	map03040 Spliceosome						S	KOG1705	Uncharacterized conserved protein, contains CXXC motifs
A0A1U8GXD6	AP-3 complex subunit mu OS=Capsicum annuum OX=4072 GN=T459_33103 PE=3 SV=1	T459_33103	0.768	0.012998	Down	46.4	1.013	1.08	0.859	1.041	1.023	0.992	0.853	0.96	0.795	1.197	1.109	1.088	0.792	0.783	0.895	1.225	1.159	1.147	cytoplasm	K12398	AP3M; AP-3 complex subunit mu		GO:0006810 transport; GO:0006928 movement of cell or subcellular component; GO:0007017 microtubule-based process; GO:0007018 microtubule-based movement; GO:0008088 axo-dendritic transport; GO:0008089 anterograde axonal transport; GO:0009605 response to external stimulus; GO:0009606 tropism; GO:0009628 response to abiotic stimulus; GO:0009629 response to gravity; GO:0009630 gravitropism; GO:000998…					U	KOG2740	Clathrin-associated protein medium chain
A0A2G2ZRB2	Serine carboxypeptidase-like 17 OS=Capsicum annuum OX=4072 GN=T459_12956 PE=3 SV=1	T459_12956	0.767	0.000662172	Down	52.6	0.911	0.892	0.922	1.066	1.08	1.106	0.845	0.899	0.87	1.102	1.122	1.182	0.992	1.188	1.161	0.873	0.922	0.849	extracellular	K16296	SCPL-I; serine carboxypeptidase-like clade I [EC:3.4.16.-]					PF00450	Serine carboxypeptidase	EO	KOG1282	Serine carboxypeptidases (lysosomal cathepsin A)
A0A1U8E5R9	Metallothionein-like protein type 2 OS=Capsicum annuum OX=4072 GN=T459_22986 PE=4 SV=1	T459_22986	2.191	5.50228e-06	Up	8.2	1.194	1.218	1.198	0.786	0.822	0.786	1.422	1.363	1.348	0.608	0.631	0.647							chloroplast									S	KOG4738	Predicted metallothionein
A0A2G2ZES5	Pentatricopeptide repeat-containing protein OS=Capsicum annuum OX=4072 GN=T459_18463 PE=4 SV=1	T459_18463	0.725	0.00149018	Down	81.8	1.047	1.125	1.049	0.906	0.935	0.941	0.796	0.818	0.908	1.168	1.134	1.176	0.788	0.808	0.824	1.14	1.148	1.25	chloroplast				GO:0006139 nucleobase-containing compound metabolic process; GO:0006725 cellular aromatic compound metabolic process; GO:0006807 nitrogen compound metabolic process; GO:0006950 response to stress; GO:0008152 metabolic process; GO:0009266 response to temperature stimulus; GO:0009409 response to cold; GO:0009451 RNA modification; GO:0009628 response to abiotic stimulus; GO:0009987 cellular process;…	GO:0005622 intracellular; GO:0005623 cell; GO:0005737 cytoplasm; GO:0009507 chloroplast; GO:0009534 chloroplast thylakoid; GO:0009535 chloroplast thylakoid membrane; GO:0009536 plastid; GO:0009579 thylakoid; GO:0016020 membrane; GO:0031976 plastid thylakoid; GO:0031984 organelle subcompartment; GO:0034357 photosynthetic membrane; GO:0042651 thylakoid membrane; GO:0043226 organelle; GO:0043227 mem…	GO:0003676 nucleic acid binding; GO:0003723 RNA binding; GO:0003729 mRNA binding; GO:0003824 catalytic activity; GO:0004518 nuclease activity; GO:0004519 endonuclease activity; GO:0005488 binding; GO:0016787 hydrolase activity; GO:0016788 hydrolase activity, acting on ester bonds; GO:0097159 organic cyclic compound binding; GO:1901363 heterocyclic compound binding;			S	KOG4197	FOG: PPR repeat
A0A1U8E7P7	A-agglutinin anchorage subunit like(predicted) OS=Capsicum annuum OX=4072 GN=T459_31927 PE=4 SV=1	T459_31927	1.324	0.00437067	Up	47.6	0.911	0.923	0.926	1.087	0.946	1.214	1.114	1.136	1.175	0.827	0.816	0.943	1.06	1.078	1.069	0.97	0.908	0.927	chloroplast
A0A2G3A9I4	Zinc finger CCCH domain-containing protein 1 OS=Capsicum annuum OX=4072 GN=T459_05983 PE=4 SV=1	T459_05983	0.693	0.00237663	Down	50	0.929	0.938	0.911	1.068	1.05	1.111	0.773	0.799	0.883	1.11	1.177	1.256							chloroplast	K13127	RNF113A, CWC24; RING finger protein 113A		GO:0000375 RNA splicing, via transesterification reactions; GO:0000377 RNA splicing, via transesterification reactions with bulged adenosine as nucleophile; GO:0000398 mRNA splicing, via spliceosome; GO:0006139 nucleobase-containing compound metabolic process; GO:0006396 RNA processing; GO:0006397 mRNA processing; GO:0006725 cellular aromatic compound metabolic process; GO:0006807 nitrogen compou…	GO:0005622 intracellular; GO:0005623 cell; GO:0005634 nucleus; GO:0005681 spliceosomal complex; GO:0005684 U2-type spliceosomal complex; GO:0016020 membrane; GO:0032991 protein-containing complex; GO:0043226 organelle; GO:0043227 membrane-bounded organelle; GO:0043229 intracellular organelle; GO:0043231 intracellular membrane-bounded organelle; GO:1990904 ribonucleoprotein complex;		PF00097	Zinc finger, C3HC4 type (RING finger)	O	KOG1813	Predicted E3 ubiquitin ligase
A0A2G3A0S7	Serine protease inhibitor 1 OS=Capsicum annuum OX=4072 GN=T459_09951 PE=4 SV=1	T459_09951	1.97	0.000101702	Up	24.5	0.851	0.846	0.854	1.112	1.057	1.287	1.396	1.327	1.285	0.661	0.646	0.728	1.297	1.327	1.277	0.698	0.688	0.666	extracellular							PF00197	Trypsin and protease inhibitor
A0A1U8H431	TPT domain-containing protein OS=Capsicum annuum OX=4072 GN=T459_16894 PE=4 SV=1	T459_16894	0.724	0.0160061	Down	38.3	0.881	0.813	0.877	1.196	1.097	1.142	0.945	0.854	0.722	1.183	1.107	1.192							plasma membrane	K15285	SLC35E3; solute carrier family 35, member E3		GO:0006810 transport; GO:0006811 ion transport; GO:0006820 anion transport; GO:0015711 organic anion transport; GO:0015780 nucleotide-sugar transmembrane transport; GO:0015783 GDP-fucose transmembrane transport; GO:0015786 UDP-glucose transmembrane transport; GO:0015931 nucleobase-containing compound transport; GO:0034220 ion transmembrane transport; GO:0051179 localization; GO:0051234 establishm…	GO:0005622 intracellular; GO:0005623 cell; GO:0005737 cytoplasm; GO:0005794 Golgi apparatus; GO:0012505 endomembrane system; GO:0043226 organelle; GO:0043227 membrane-bounded organelle; GO:0043229 intracellular organelle; GO:0043231 intracellular membrane-bounded organelle;	GO:0005215 transporter activity; GO:0005338 nucleotide-sugar transmembrane transporter activity; GO:0005457 GDP-fucose transmembrane transporter activity; GO:0005459 UDP-galactose transmembrane transporter activity; GO:0005460 UDP-glucose transmembrane transporter activity; GO:0008509 anion transmembrane transporter activity; GO:0008514 organic anion transmembrane transporter activity; GO:0015075…			EG	KOG1441	Glucose-6-phosphate/phosphate and phosphoenolpyruvate/phosphate antiporter
A0A2G3AK64	Peptidase_S9 domain-containing protein OS=Capsicum annuum OX=4072 GN=T459_02472 PE=4 SV=1	T459_02472	0.742	0.000100416	Down	37.5	1.01	1.023	1.021	1.018	0.987	0.947	0.858	0.841	0.857	1.113	1.185	1.148	1.037	0.85	0.903	1.065	1.04	1.111	cytoplasm					GO:0005622 intracellular; GO:0005623 cell; GO:0005737 cytoplasm; GO:0009507 chloroplast; GO:0009532 plastid stroma; GO:0009536 plastid; GO:0009570 chloroplast stroma; GO:0043226 organelle; GO:0043227 membrane-bounded organelle; GO:0043229 intracellular organelle; GO:0043231 intracellular membrane-bounded organelle;		PF00326	Prolyl oligopeptidase family	O	KOG2100	Dipeptidyl aminopeptidase
A0A1U8EEQ3	Thioredoxin H9 OS=Capsicum annuum OX=4072 GN=T459_23672 PE=4 SV=1	T459_23672	0.679	0.00499007	Down	16.8	0.944	0.89	0.926	1.099	1.081	1.067	0.876	0.719	0.831	1.218	1.107	1.249							chloroplast	K03671	trxA; thioredoxin 1		GO:0006950 response to stress; GO:0006979 response to oxidative stress; GO:0007154 cell communication; GO:0008152 metabolic process; GO:0009636 response to toxic substance; GO:0009987 cellular process; GO:0019725 cellular homeostasis; GO:0033554 cellular response to stress; GO:0034599 cellular response to oxidative stress; GO:0042221 response to chemical; GO:0042592 homeostatic process; GO:004545…	GO:0005622 intracellular; GO:0005623 cell; GO:0005634 nucleus; GO:0005737 cytoplasm; GO:0005829 cytosol; GO:0005886 plasma membrane; GO:0009536 plastid; GO:0016020 membrane; GO:0043226 organelle; GO:0043227 membrane-bounded organelle; GO:0043229 intracellular organelle; GO:0043231 intracellular membrane-bounded organelle; GO:0071944 cell periphery;	GO:0003824 catalytic activity; GO:0004791 thioredoxin-disulfide reductase activity; GO:0015035 protein disulfide oxidoreductase activity; GO:0015036 disulfide oxidoreductase activity; GO:0016209 antioxidant activity; GO:0016491 oxidoreductase activity; GO:0016651 oxidoreductase activity, acting on NAD(P)H; GO:0016667 oxidoreductase activity, acting on a sulfur group of donors; GO:0016668 oxidored…	PF00085	Thioredoxin	O	KOG0907	Thioredoxin
A0A2G3ADQ8	Putative mitochondrial import inner membrane translocase subunit TIM21 OS=Capsicum annuum OX=4072 GN=T459_00246 PE=4 SV=1	T459_00246	1.436	0.00028023	Up	34.2	1.07	1.102	1.036	0.924	0.946	0.933	1.193	1.234	1.118	0.836	0.821	0.812	1.118	1.1	1.11	0.868	0.895	0.9	chloroplast	K17796	TIM21; mitochondrial import inner membrane translocase subunit TIM21		GO:0006605 protein targeting; GO:0006626 protein targeting to mitochondrion; GO:0006810 transport; GO:0006839 mitochondrial transport; GO:0006886 intracellular protein transport; GO:0006996 organelle organization; GO:0007005 mitochondrion organization; GO:0007275 multicellular organism development; GO:0008104 protein localization; GO:0008535 respiratory chain complex IV assembly; GO:0009791 post-…	GO:0005622 intracellular; GO:0005623 cell; GO:0005737 cytoplasm; GO:0005739 mitochondrion; GO:0005740 mitochondrial envelope; GO:0005743 mitochondrial inner membrane; GO:0005744 TIM23 mitochondrial import inner membrane translocase complex; GO:0016020 membrane; GO:0019866 organelle inner membrane; GO:0031090 organelle membrane; GO:0031966 mitochondrial membrane; GO:0031967 organelle envelope; GO:…		PF08294	TIM21	S	KOG4836	Uncharacterized conserved protein
A0A2G2YJF3	PLAT domain-containing protein OS=Capsicum annuum OX=4072 GN=T459_24963 PE=4 SV=1	T459_24963	1.31	0.000460965	Up	20.7	1.114	1.108	1.12	0.862	0.911	0.89	1.174	1.1	1.135	0.855	0.85	0.898	1.176	1.198	1.226	0.77	0.834	0.81	extracellular				GO:0001101 response to acid chemical; GO:0006950 response to stress; GO:0006970 response to osmotic stress; GO:0009266 response to temperature stimulus; GO:0009409 response to cold; GO:0009414 response to water deprivation; GO:0009415 response to water; GO:0009628 response to abiotic stimulus; GO:0009651 response to salt stress; GO:0010035 response to inorganic substance; GO:0042221 response to c…	GO:0005622 intracellular; GO:0005623 cell; GO:0005737 cytoplasm; GO:0005773 vacuole; GO:0005774 vacuolar membrane; GO:0005783 endoplasmic reticulum; GO:0005886 plasma membrane; GO:0009507 chloroplast; GO:0009534 chloroplast thylakoid; GO:0009535 chloroplast thylakoid membrane; GO:0009536 plastid; GO:0009579 thylakoid; GO:0012505 endomembrane system; GO:0016020 membrane; GO:0031090 organelle membr…		PF01477	PLAT/LH2 domain
A0A2G2YCA5	Serine/threonine-protein kinase PRP4-like protein OS=Capsicum annuum OX=4072 GN=T459_26870 PE=4 SV=1	T459_26870	1.324	0.00626844	Up	117.7	0.972	0.994	1.01	0.998	1.053	0.978	1.087	1.122	1.215	0.794	0.914	0.879	0.942	0.816	0.936	1.084	1.111	1.114	nucleus	K08827	PRPF4B; serine/threonine-protein kinase PRP4 [EC:2.7.11.1]		GO:0006464 cellular protein modification process; GO:0006468 protein phosphorylation; GO:0006793 phosphorus metabolic process; GO:0006796 phosphate-containing compound metabolic process; GO:0006807 nitrogen compound metabolic process; GO:0008152 metabolic process; GO:0009987 cellular process; GO:0016310 phosphorylation; GO:0019538 protein metabolic process; GO:0036211 protein modification process…	GO:0005622 intracellular; GO:0005623 cell; GO:0005634 nucleus; GO:0043226 organelle; GO:0043227 membrane-bounded organelle; GO:0043229 intracellular organelle; GO:0043231 intracellular membrane-bounded organelle;		PF00069	Protein kinase domain	T	KOG0670	U4/U6-associated splicing factor PRP4
A0A2G3AIJ1	60S ribosomal protein L19 OS=Capsicum annuum OX=4072 GN=T459_01937 PE=4 SV=1	T459_01937	1.312	0.0274582	Up	24.2	1.147	0.948	1.068	0.954	0.925	0.964	1.044	1.132	1.234	0.767	0.874	0.958	1.086	1.033	1.068	0.918	0.928	0.977	cytoplasm	K02885	RP-L19e, RPL19; large subunit ribosomal protein L19e	map03010 Ribosome	GO:0006412 translation; GO:0006518 peptide metabolic process; GO:0006807 nitrogen compound metabolic process; GO:0008152 metabolic process; GO:0009058 biosynthetic process; GO:0009059 macromolecule biosynthetic process; GO:0009987 cellular process; GO:0010467 gene expression; GO:0019538 protein metabolic process; GO:0034641 cellular nitrogen compound metabolic process; GO:0034645 cellular macromo…	GO:0005622 intracellular; GO:0005623 cell; GO:0005634 nucleus; GO:0005730 nucleolus; GO:0005737 cytoplasm; GO:0005829 cytosol; GO:0005840 ribosome; GO:0005844 polysome; GO:0005886 plasma membrane; GO:0005911 cell-cell junction; GO:0009506 plasmodesma; GO:0015934 large ribosomal subunit; GO:0016020 membrane; GO:0022625 cytosolic large ribosomal subunit; GO:0022626 cytosolic ribosome; GO:0030054 ce…	GO:0003676 nucleic acid binding; GO:0003723 RNA binding; GO:0003729 mRNA binding; GO:0003735 structural constituent of ribosome; GO:0005198 structural molecule activity; GO:0005488 binding; GO:0097159 organic cyclic compound binding; GO:1901363 heterocyclic compound binding;			J	KOG1696	60s ribosomal protein L19
A0A2G2Y1Z1	Ferredoxin OS=Capsicum annuum OX=4072 GN=T459_32415 PE=3 SV=1	T459_32415	1.559	9.86974e-05	Up	10.5	1.048	1.051	0.95	0.984	0.986	0.988	1.268	1.242	1.155	0.78	0.784	0.787	1.108	1.055	0.934	0.991	0.997	0.927	chloroplast	K02639	petF; ferredoxin	map00195 Photosynthesis	GO:0008152 metabolic process; GO:0009314 response to radiation; GO:0009416 response to light stimulus; GO:0009628 response to abiotic stimulus; GO:0009987 cellular process; GO:0015979 photosynthesis; GO:0044237 cellular metabolic process; GO:0050896 response to stimulus;	GO:0005622 intracellular; GO:0005623 cell; GO:0005737 cytoplasm; GO:0009507 chloroplast; GO:0009536 plastid; GO:0043226 organelle; GO:0043227 membrane-bounded organelle; GO:0043229 intracellular organelle; GO:0043231 intracellular membrane-bounded organelle;		PF00111	2Fe-2S iron-sulfur cluster binding domain
A0A2G2Z0R5	Non-symbiotic hemoglobin 1 OS=Capsicum annuum OX=4072 GN=T459_19132 PE=3 SV=1	T459_19132	1.41	0.000451385	Up	17.1	1.125	1.139	1.152	0.873	0.879	0.884	1.136	1.137	1.244	0.833	0.848	0.814	1.226	1.13	1.168	0.796	0.836	0.818	cytoplasm	K21894	CYGB; cytoglobin					PF00042	Globin	C	KOG3378	Globins and related hemoproteins
A0A2G2ZVX9	Exocyst complex component OS=Capsicum annuum OX=4072 GN=T459_08231 PE=3 SV=1	T459_08231	0.711	0.000317069	Down	91.1	1.04	1.207	1.116	0.84	0.93	0.927	0.834	0.798	0.862	1.186	1.196	1.125	0.858	0.905	0.861	1.11	1.169	1.112	mitochondria	K19985	EXOC6, SEC15; exocyst complex component 6		GO:0000003 reproduction; GO:0000902 cell morphogenesis; GO:0000904 cell morphogenesis involved in differentiation; GO:0003006 developmental process involved in reproduction; GO:0007154 cell communication; GO:0008037 cell recognition; GO:0009653 anatomical structure morphogenesis; GO:0009826 unidimensional cell growth; GO:0009846 pollen germination; GO:0009856 pollination; GO:0009860 pollen tube g…	GO:0000145 exocyst; GO:0005576 extracellular region; GO:0005615 extracellular space; GO:0005622 intracellular; GO:0005623 cell; GO:0005737 cytoplasm; GO:0005829 cytosol; GO:0005886 plasma membrane; GO:0005911 cell-cell junction; GO:0005938 cell cortex; GO:0009506 plasmodesma; GO:0016020 membrane; GO:0030054 cell junction; GO:0031982 vesicle; GO:0032991 protein-containing complex; GO:0043226 organ…				U	KOG2176	Exocyst complex, subunit SEC15
A0A2G3A3S9	26S protease regulatory subunit 7 OS=Capsicum annuum OX=4072 GN=T459_10991 PE=3 SV=1	T459_10991	0.674	0.000975762	Down	46.8	0.85	0.87	0.872	1.142	1.142	1.13	0.797	0.847	0.772	1.284	1.148	1.154							cytoplasm	K03061	PSMC2, RPT1; 26S proteasome regulatory subunit T1	map03050 Proteasome	GO:0006355 regulation of transcription, DNA-templated; GO:0006357 regulation of transcription by RNA polymerase II; GO:0006508 proteolysis; GO:0006511 ubiquitin-dependent protein catabolic process; GO:0006807 nitrogen compound metabolic process; GO:0006950 response to stress; GO:0008152 metabolic process; GO:0009056 catabolic process; GO:0009057 macromolecule catabolic process; GO:0009889 regulat…	GO:0000502 proteasome complex; GO:0005622 intracellular; GO:0005623 cell; GO:0005634 nucleus; GO:0005737 cytoplasm; GO:0005829 cytosol; GO:0005886 plasma membrane; GO:0016020 membrane; GO:0031595 nuclear proteasome complex; GO:0031597 cytosolic proteasome complex; GO:0031974 membrane-enclosed lumen; GO:0031981 nuclear lumen; GO:0032991 protein-containing complex; GO:0043226 organelle; GO:0043227 …	GO:0003824 catalytic activity; GO:0005488 binding; GO:0005515 protein binding; GO:0008134 transcription factor binding; GO:0016462 pyrophosphatase activity; GO:0016787 hydrolase activity; GO:0016817 hydrolase activity, acting on acid anhydrides; GO:0016818 hydrolase activity, acting on acid anhydrides, in phosphorus-containing anhydrides; GO:0016887 ATPase activity; GO:0017025 TBP-class protein b…	PF00004	ATPase family associated with various cellular activities (AAA)	O	KOG0729	26S proteasome regulatory complex, ATPase RPT1
A0A2G2ZL31	Bet_v_1 domain-containing protein OS=Capsicum annuum OX=4072 GN=T459_11135 PE=4 SV=1	T459_11135	1.833	4.31913e-05	Up	12.9	1.07	1.117	1.034	0.947	0.926	0.942	1.364	1.277	1.243	0.724	0.687	0.708	1.417	1.431	1.31	0.603	0.619	0.613	cytoplasm					GO:0005622 intracellular; GO:0005623 cell; GO:0005737 cytoplasm; GO:0009507 chloroplast; GO:0009536 plastid; GO:0043226 organelle; GO:0043227 membrane-bounded organelle; GO:0043229 intracellular organelle; GO:0043231 intracellular membrane-bounded organelle;		PF00407	Pathogenesis-related protein Bet v I family
A0A1U8GDF9	Serine/threonine-protein phosphatase OS=Capsicum annuum OX=4072 GN=T459_02209 PE=3 SV=1	T459_02209	0.615	0.000472197	Down	35	1.039	1.049	1.054	0.888	0.984	0.99	0.746	0.752	0.787	1.346	1.17	1.199	0.836	0.724	0.735	1.177	1.27	1.259	cytoplasm	K04382	PPP2C; serine/threonine-protein phosphatase 2A catalytic subunit [EC:3.1.3.16]	map03015 mRNA surveillance pathway; map04136 Autophagy - other				PF00149	Calcineurin-like phosphoesterase	T	KOG0371	Serine/threonine protein phosphatase 2A, catalytic subunit
A0A2G3AAS4	Non-specific lipid-transfer protein 2 OS=Capsicum annuum OX=4072 GN=T459_06459 PE=4 SV=1	T459_06459	1.703	0.00148726	Up	9.9	0.962	1.094	1.198	0.864	1.003	0.882	1.13	1.396	1.264	0.753	0.699	0.774	1.145	1.464	1.232	0.81	0.73	0.638	extracellular
A0A2G2ZSZ3	Tetratricopeptide repeat protein SKI3 (Fragment) OS=Capsicum annuum OX=4072 GN=T459_13537 PE=4 SV=1	T459_13537	0.734	0.0112413	Down	131.6	1.116	1.13	1.188	0.882	0.854	0.836	0.803	0.791	0.946	1.224	1.169	1.068	0.843	0.832	0.77	1.154	1.24	1.221	nucleus	K12600	SKI3, TTC37; superkiller protein 3	map03018 RNA degradation	GO:0000184 nuclear-transcribed mRNA catabolic process, nonsense-mediated decay; GO:0000288 nuclear-transcribed mRNA catabolic process, deadenylation-dependent decay; GO:0000291 nuclear-transcribed mRNA catabolic process, exonucleolytic; GO:0000956 nuclear-transcribed mRNA catabolic process; GO:0006139 nucleobase-containing compound metabolic process; GO:0006401 RNA catabolic process; GO:0006402 m…	GO:0000785 chromatin; GO:0005622 intracellular; GO:0005623 cell; GO:0005634 nucleus; GO:0005694 chromosome; GO:0005737 cytoplasm; GO:0032991 protein-containing complex; GO:0035327 transcriptionally active chromatin; GO:0043226 organelle; GO:0043227 membrane-bounded organelle; GO:0043228 non-membrane-bounded organelle; GO:0043229 intracellular organelle; GO:0043231 intracellular membrane-bounded o…				A	KOG1127	TPR repeat-containing protein
A0A2G3ANC5	60S acidic ribosomal protein P2 OS=Capsicum annuum OX=4072 GN=T459_03623 PE=4 SV=1	T459_03623	1.371	0.00107973	Up	18.7	0.977	1.072	1.038	1.043	0.929	0.947	1.217	1.154	1.105	0.804	0.864	0.868	1.017	1.111	0.995	0.968	0.933	0.986	plasma membrane	K02943	RP-LP2, RPLP2; large subunit ribosomal protein LP2	map03010 Ribosome
A0A1U8ESQ6	Cysteine proteinase RD21a OS=Capsicum annuum OX=4072 GN=T459_30828 PE=3 SV=1	T459_30828	0.668	0.00014673	Down	51	0.868	0.866	0.863	1.144	1.105	1.144	0.794	0.756	0.832	1.178	1.182	1.207	0.949	0.89	0.897	1.093	1.11	1.129	extracellular				GO:0006508 proteolysis; GO:0006807 nitrogen compound metabolic process; GO:0007275 multicellular organism development; GO:0008152 metabolic process; GO:0009056 catabolic process; GO:0009057 macromolecule catabolic process; GO:0009555 pollen development; GO:0009987 cellular process; GO:0019538 protein metabolic process; GO:0030163 protein catabolic process; GO:0032501 multicellular organismal proc…	GO:0000323 lytic vacuole; GO:0005576 extracellular region; GO:0005615 extracellular space; GO:0005622 intracellular; GO:0005623 cell; GO:0005737 cytoplasm; GO:0005764 lysosome; GO:0005773 vacuole; GO:0043226 organelle; GO:0043227 membrane-bounded organelle; GO:0043229 intracellular organelle; GO:0043231 intracellular membrane-bounded organelle;	GO:0003824 catalytic activity; GO:0004175 endopeptidase activity; GO:0004197 cysteine-type endopeptidase activity; GO:0008233 peptidase activity; GO:0008234 cysteine-type peptidase activity; GO:0016787 hydrolase activity; GO:0070011 peptidase activity, acting on L-amino acid peptides; GO:0140096 catalytic activity, acting on a protein;	PF08246; PF00112	Cathepsin propeptide inhibitor domain (I29); Papain family cysteine protease	O	KOG4296	Epithelin/granulin
A0A2G3AF25	HABP4_PAI-RBP1 domain-containing protein OS=Capsicum annuum OX=4072 GN=T459_00721 PE=4 SV=1	T459_00721	1.339	3.35305e-05	Up	41	1.034	1.025	0.968	0.971	1.016	0.982	1.152	1.16	1.142	0.837	0.875	0.867	0.986	0.981	0.974	1.006	1.098	0.968	nucleus	K13199	SERBP1; plasminogen activator inhibitor 1 RNA-binding protein		GO:0001101 response to acid chemical; GO:0006950 response to stress; GO:0006970 response to osmotic stress; GO:0009628 response to abiotic stimulus; GO:0009651 response to salt stress; GO:0009719 response to endogenous stimulus; GO:0009725 response to hormone; GO:0009735 response to cytokinin; GO:0009737 response to abscisic acid; GO:0009787 regulation of abscisic acid-activated signaling pathway…	GO:0005622 intracellular; GO:0005623 cell; GO:0005634 nucleus; GO:0005737 cytoplasm; GO:0005777 peroxisome; GO:0005829 cytosol; GO:0005886 plasma membrane; GO:0016020 membrane; GO:0042579 microbody; GO:0043226 organelle; GO:0043227 membrane-bounded organelle; GO:0043229 intracellular organelle; GO:0043231 intracellular membrane-bounded organelle; GO:0048471 perinuclear region of cytoplasm; GO:007…	GO:0003676 nucleic acid binding; GO:0003723 RNA binding; GO:0003729 mRNA binding; GO:0005488 binding; GO:0097159 organic cyclic compound binding; GO:1901363 heterocyclic compound binding;			S	KOG2945	Predicted RNA-binding protein
A0A1U8HHN4	Peroxidase OS=Capsicum annuum OX=4072 GN=T459_19999 PE=3 SV=1	T459_19999	1.336	0.000117525	Up	36	1.046	1.033	1.012	0.976	0.961	0.992	1.155	1.103	1.167	0.858	0.84	0.865	1.405	1.342	1.36	0.62	0.62	0.613	plasma membrane	K00430	E1.11.1.7; peroxidase [EC:1.11.1.7]	map00940 Phenylpropanoid biosynthesis; map01100 Metabolic pathways; map01110 Biosynthesis of secondary metabolites	GO:0001101 response to acid chemical; GO:0006950 response to stress; GO:0006970 response to osmotic stress; GO:0006972 hyperosmotic response; GO:0008152 metabolic process; GO:0009266 response to temperature stimulus; GO:0009269 response to desiccation; GO:0009409 response to cold; GO:0009414 response to water deprivation; GO:0009415 response to water; GO:0009628 response to abiotic stimulus; GO:0…	GO:0005618 cell wall; GO:0005622 intracellular; GO:0005623 cell; GO:0005634 nucleus; GO:0005737 cytoplasm; GO:0005783 endoplasmic reticulum; GO:0005911 cell-cell junction; GO:0009505 plant-type cell wall; GO:0009506 plasmodesma; GO:0012505 endomembrane system; GO:0030054 cell junction; GO:0030312 external encapsulating structure; GO:0043226 organelle; GO:0043227 membrane-bounded organelle; GO:004…	GO:0003824 catalytic activity; GO:0004601 peroxidase activity; GO:0016209 antioxidant activity; GO:0016491 oxidoreductase activity; GO:0016684 oxidoreductase activity, acting on peroxide as acceptor;	PF00141	Peroxidase
A0A1U8H8Q9	FAD_binding_3 domain-containing protein OS=Capsicum annuum OX=4072 GN=T459_18807 PE=4 SV=1	T459_18807	0.571	0.00209406	Down	77.1	0.805	0.9	0.644	1.298	1.225	1.139	0.738	0.709	0.733	1.116	1.244	1.456	1.243	1.085	1.183	0.844	0.868	0.791	chloroplast
A0A1U8GH30	Vesicle-associated membrane protein OS=Capsicum annuum OX=4072 GN=T459_07519 PE=3 SV=1	T459_07519	0.72	0.000724105	Down	24.9	1.025	1.01	1.017	0.986	0.992	0.976	0.865	0.843	0.804	1.227	1.118	1.146							extracellular	K08511	ATVAMP72; vesicle-associated membrane protein 72					PF13774	Regulated-SNARE-like domain	U	KOG0859	Synaptobrevin/VAMP-like protein
A0A1U8H397	Ferredoxin OS=Capsicum annuum OX=4072 GN=T459_18060 PE=3 SV=1	T459_18060	1.426	0.000135266	Up	16	1.068	1.064	1.051	0.915	0.955	0.952	1.216	1.196	1.124	0.818	0.834	0.828	1.104	0.958	1.055	0.928	1.018	0.946	chloroplast	K02639	petF; ferredoxin	map00195 Photosynthesis				PF00111	2Fe-2S iron-sulfur cluster binding domain
A0A2G2ZQE4	Methyl-cpg-binding domain-containing protein 8(predicted) OS=Capsicum annuum OX=4072 GN=T459_12656 PE=4 SV=1	T459_12656	0.641	0.0148952	Down	103.6	0.984	0.968	0.944	1.106	1.022	0.996	0.924	0.63	0.79	1.24	1.214	1.203							nucleus					GO:0005622 intracellular; GO:0005623 cell; GO:0005634 nucleus; GO:0043226 organelle; GO:0043227 membrane-bounded organelle; GO:0043229 intracellular organelle; GO:0043231 intracellular membrane-bounded organelle;	GO:0000166 nucleotide binding; GO:0003676 nucleic acid binding; GO:0003677 DNA binding; GO:0005488 binding; GO:0008327 methyl-CpG binding; GO:0036094 small molecule binding; GO:0043565 sequence-specific DNA binding; GO:0097159 organic cyclic compound binding; GO:1901265 nucleoside phosphate binding; GO:1901363 heterocyclic compound binding;
A0A2G2ZE21	RING-CH-type domain-containing protein(predicted) OS=Capsicum annuum OX=4072 GN=T459_18298 PE=4 SV=1	T459_18298	1.526	0.00079606	Up	17.7	1.059	1.038	1.047	0.956	0.976	0.93	1.208	1.226	1.199	0.724	0.812	0.844	1.007	0.993	1.002	0.985	1.087	0.935	chloroplast
A0A1U8HFQ9	Deoxyuridine 5'-triphosphate nucleotidohydrolase OS=Capsicum annuum OX=4072 GN=T459_33689 PE=4 SV=1	T459_33689	1.328	0.000504106	Up	18.2	0.993	0.986	1.041	0.976	0.993	0.998	1.173	1.106	1.151	0.862	0.892	0.828	1.19	1.03	1.066	0.885	0.887	0.954	cytoplasm	K01520	dut, DUT; dUTP pyrophosphatase [EC:3.6.1.23]	map00240 Pyrimidine metabolism; map01100 Metabolic pathways	GO:0006139 nucleobase-containing compound metabolic process; GO:0006220 pyrimidine nucleotide metabolic process; GO:0006221 pyrimidine nucleotide biosynthetic process; GO:0006226 dUMP biosynthetic process; GO:0006244 pyrimidine nucleotide catabolic process; GO:0006259 DNA metabolic process; GO:0006281 DNA repair; GO:0006725 cellular aromatic compound metabolic process; GO:0006753 nucleoside phosp…	GO:0005622 intracellular; GO:0005623 cell; GO:0005737 cytoplasm; GO:0005829 cytosol;	GO:0000287 magnesium ion binding; GO:0003824 catalytic activity; GO:0004170 dUTP diphosphatase activity; GO:0005488 binding; GO:0005515 protein binding; GO:0016462 pyrophosphatase activity; GO:0016787 hydrolase activity; GO:0016817 hydrolase activity, acting on acid anhydrides; GO:0016818 hydrolase activity, acting on acid anhydrides, in phosphorus-containing anhydrides; GO:0042802 identical prot…	PF00692	dUTPase	F	KOG3370	dUTPase
A0A2G2Y7G8	Putative ovule protein(predicted) OS=Capsicum annuum OX=4072 GN=T459_30130 PE=4 SV=1	T459_30130	1.361	0.00977897	Up	8.9	0.932	0.908	0.85	1.066	1.152	1.1	1.116	1.2	1.15	0.747	0.924	0.876	0.706	0.75	0.624	1.258	1.307	1.353	nucleus
A0A2G2Y0I0	Usp domain-containing protein OS=Capsicum annuum OX=4072 GN=T459_32892 PE=4 SV=1	T459_32892	0.735	0.00920199	Down	17.1	0.841	0.832	0.867	1.114	1.17	1.181	0.879	0.756	0.908	1.08	1.209	1.169	0.825	0.834	0.805	1.105	1.204	1.172	cytoplasm							PF00582	Universal stress protein family
A0A1U8F3J1	Tubulin beta chain OS=Capsicum annuum OX=4072 GN=T459_16406 PE=3 SV=1	T459_16406	0.73	0.000133986	Down	50.2	0.851	1	0.803	1.126	1.168	1.06	0.818	0.852	0.862	1.174	1.122	1.173							nucleus	K07375	TUBB; tubulin beta	map04145 Phagosome		GO:0005622 intracellular; GO:0005623 cell; GO:0005856 cytoskeleton; GO:0043226 organelle; GO:0043228 non-membrane-bounded organelle; GO:0043229 intracellular organelle; GO:0043232 intracellular non-membrane-bounded organelle;		PF00091; PF03953	Tubulin/FtsZ family, GTPase domain; Tubulin C-terminal domain	Z	KOG1375	Beta tubulin
A0A2G2Y6Z5	PMEI domain-containing protein OS=Capsicum annuum OX=4072 GN=T459_29935 PE=4 SV=1	T459_29935	1.566	5.33947e-05	Up	21.8	1.055	1.047	1.026	0.968	0.935	0.976	1.262	1.214	1.195	0.808	0.778	0.758	1.138	1.123	1.172	0.86	0.874	0.844	extracellular				GO:0009628 response to abiotic stimulus; GO:0043086 negative regulation of catalytic activity; GO:0044092 negative regulation of molecular function; GO:0050790 regulation of catalytic activity; GO:0050896 response to stimulus; GO:0065007 biological regulation; GO:0065009 regulation of molecular function; GO:0080167 response to karrikin;		GO:0004857 enzyme inhibitor activity; GO:0030234 enzyme regulator activity; GO:0046910 pectinesterase inhibitor activity; GO:0098772 molecular function regulator;	PF04043	Plant invertase/pectin methylesterase inhibitor
A0A2G2ZS00	Geranylgeranyl pyrophosphate synthase, chloroplastic OS=Capsicum annuum OX=4072 GN=T459_13211 PE=4 SV=1	T459_13211	1.415	7.65943e-05	Up	18.5	1.019	1.087	1.079	0.926	0.947	0.934	1.151	1.168	1.166	0.853	0.814	0.796	1.174	1.102	1.144	0.79	0.928	0.874	chloroplast	K13789	GGPS; geranylgeranyl diphosphate synthase, type II [EC:2.5.1.1 2.5.1.10 2.5.1.29]	map00900 Terpenoid backbone biosynthesis; map01100 Metabolic pathways; map01110 Biosynthesis of secondary metabolites						H	KOG0776	Geranylgeranyl pyrophosphate synthase/Polyprenyl synthetase
A0A2G3AEG9	Putative low-specificity L-threonine aldolase 1(predicted) OS=Capsicum annuum OX=4072 GN=T459_00514 PE=4 SV=1	T459_00514	0.768	0.0215308	Down	44.3	0.94	0.924	0.894	1.105	1.042	1.102	0.791	0.988	0.83	1.073	1.144	1.178	1.063	1.201	0.996	0.87	0.907	0.975	chloroplast	K02350	REV3L, POLZ; DNA polymerase zeta [EC:2.7.7.7]							L	KOG0017	FOG: Transposon-encoded proteins with TYA, reverse transcriptase, integrase domains in various combinations
A0A2G3A9A0	chromatin remodeling protein EBS-like isoform X1(predicted) OS=Capsicum annuum OX=4072 GN=T459_05932 PE=4 SV=1	T459_05932	0.738	0.0288012	Down	24.9	0.919	0.946	0.882	1.035	1.11	1.115	0.905	0.912	0.732	1.265	1.15	1.04	0.823	0.801	0.877	1.271	1.195	1.037	chloroplast				GO:0006323 DNA packaging; GO:0006325 chromatin organization; GO:0006333 chromatin assembly or disassembly; GO:0006338 chromatin remodeling; GO:0006342 chromatin silencing; GO:0006355 regulation of transcription, DNA-templated; GO:0006996 organelle organization; GO:0007275 multicellular organism development; GO:0009791 post-embryonic development; GO:0009845 seed germination; GO:0009889 regulation …	GO:0000785 chromatin; GO:0005622 intracellular; GO:0005623 cell; GO:0005634 nucleus; GO:0005654 nucleoplasm; GO:0005677 chromatin silencing complex; GO:0005694 chromosome; GO:0017053 transcription repressor complex; GO:0031974 membrane-enclosed lumen; GO:0031981 nuclear lumen; GO:0032991 protein-containing complex; GO:0043226 organelle; GO:0043227 membrane-bounded organelle; GO:0043228 non-membra…	GO:0000976 transcription regulatory region sequence-specific DNA binding; GO:0001067 regulatory region nucleic acid binding; GO:0003676 nucleic acid binding; GO:0003677 DNA binding; GO:0003682 chromatin binding; GO:0003690 double-stranded DNA binding; GO:0005488 binding; GO:0005515 protein binding; GO:0035064 methylated histone binding; GO:0042393 histone binding; GO:0043565 sequence-specific DNA…	PF01426; PF00628	BAH domain; PHD-finger	K	KOG1886	BAH domain proteins
A0A2G3ADA8	RNA polymerase II transcriptional coactivator KELP OS=Capsicum annuum OX=4072 GN=T459_00108 PE=4 SV=1	T459_00108	1.413	4.89422e-06	Up	22.3	1.088	1.04	1.046	0.936	0.952	0.946	1.183	1.176	1.162	0.84	0.836	0.816	1.096	1.119	1.189	0.829	0.862	0.854	nucleus				GO:0006355 regulation of transcription, DNA-templated; GO:0006357 regulation of transcription by RNA polymerase II; GO:0009889 regulation of biosynthetic process; GO:0009891 positive regulation of biosynthetic process; GO:0009893 positive regulation of metabolic process; GO:0010468 regulation of gene expression; GO:0010556 regulation of macromolecule biosynthetic process; GO:0010557 positive regu…	GO:0005622 intracellular; GO:0005623 cell; GO:0005634 nucleus; GO:0005667 transcription regulator complex; GO:0032991 protein-containing complex; GO:0043226 organelle; GO:0043227 membrane-bounded organelle; GO:0043229 intracellular organelle; GO:0043231 intracellular membrane-bounded organelle;	GO:0003712 transcription coregulator activity; GO:0003713 transcription coactivator activity; GO:0140110 transcription regulator activity;	PF08766; PF02229	DEK C terminal domain; Transcriptional Coactivator p15 (PC4)	K	KOG2712	Transcriptional coactivator
A0A1U8HB79	AAA domain-containing protein OS=Capsicum annuum OX=4072 GN=T459_19701 PE=3 SV=1	T459_19701	0.731	0.00441132	Down	100.4	0.966	1.028	1.043	0.96	0.891	1.118	0.918	0.786	0.83	1.109	1.135	1.224	0.758	0.886	1.101	1.045	1.102	1.11	nucleus				GO:0006950 response to stress; GO:0006952 defense response; GO:0007154 cell communication; GO:0007165 signal transduction; GO:0009605 response to external stimulus; GO:0009607 response to biotic stimulus; GO:0009617 response to bacterium; GO:0009987 cellular process; GO:0023052 signaling; GO:0042742 defense response to bacterium; GO:0043207 response to external biotic stimulus; GO:0050789 regulat…	GO:0005623 cell; GO:0005886 plasma membrane; GO:0016020 membrane; GO:0071944 cell periphery;	GO:0005488 binding; GO:0005515 protein binding; GO:0043621 protein self-association;	PF00931	NB-ARC domain	T	KOG4658	Apoptotic ATPase
A0A1U8F614	TPR_REGION domain-containing protein OS=Capsicum annuum OX=4072 GN=T459_33447 PE=4 SV=1	T459_33447	1.375	0.000542959	Up	28.2	1.043	1.095	0.958	0.99	0.967	0.959	1.158	1.178	1.111	0.815	0.811	0.88	1.14	1.102	1.11	0.905	0.859	0.902	nucleus									S	KOG4234	TPR repeat-containing protein
A0A1U8EX60	Actin-related protein 7 OS=Capsicum annuum OX=4072 GN=T459_29466 PE=3 SV=1	T459_29466	0.744	0.000431256	Down	39.5	1.008	0.929	0.992	0.957	0.985	1.006	0.826	0.898	0.852	1.17	1.167	1.124	0.922	0.936	0.904	1.092	1.052	1.1	cytoplasm	K16615	PARP7; actin-related protein 7, plant		GO:0000003 reproduction; GO:0003006 developmental process involved in reproduction; GO:0006325 chromatin organization; GO:0006996 organelle organization; GO:0007010 cytoskeleton organization; GO:0007275 multicellular organism development; GO:0009653 anatomical structure morphogenesis; GO:0009790 embryo development; GO:0009791 post-embryonic development; GO:0009793 embryo development ending in see…	GO:0005622 intracellular; GO:0005623 cell; GO:0005634 nucleus; GO:0043226 organelle; GO:0043227 membrane-bounded organelle; GO:0043229 intracellular organelle; GO:0043231 intracellular membrane-bounded organelle;	GO:0005198 structural molecule activity; GO:0005200 structural constituent of cytoskeleton;			Z	KOG0676	Actin and related proteins
A0A2G3ANH6	Monodehydroascorbate reductase OS=Capsicum annuum OX=4072 GN=T459_03661 PE=4 SV=1	T459_03661	2.14	1.50512e-05	Up	43.3	1.263	1.181	1.162	0.779	0.821	0.799	1.406	1.33	1.366	0.612	0.669	0.636	1.525	1.549	1.488	0.473	0.504	0.487	chloroplast	K08232	E1.6.5.4; monodehydroascorbate reductase (NADH) [EC:1.6.5.4]	map00053 Ascorbate and aldarate metabolism; map01100 Metabolic pathways	GO:0001101 response to acid chemical; GO:0006950 response to stress; GO:0006970 response to osmotic stress; GO:0008152 metabolic process; GO:0009056 catabolic process; GO:0009414 response to water deprivation; GO:0009415 response to water; GO:0009605 response to external stimulus; GO:0009607 response to biotic stimulus; GO:0009608 response to symbiont; GO:0009610 response to symbiotic fungus; GO:…	GO:0005622 intracellular; GO:0005623 cell; GO:0005737 cytoplasm; GO:0005777 peroxisome; GO:0005778 peroxisomal membrane; GO:0005829 cytosol; GO:0009507 chloroplast; GO:0009526 plastid envelope; GO:0009532 plastid stroma; GO:0009536 plastid; GO:0009570 chloroplast stroma; GO:0009941 chloroplast envelope; GO:0016020 membrane; GO:0031090 organelle membrane; GO:0031903 microbody membrane; GO:0031967 …	GO:0003824 catalytic activity; GO:0016491 oxidoreductase activity; GO:0016651 oxidoreductase activity, acting on NAD(P)H; GO:0016655 oxidoreductase activity, acting on NAD(P)H, quinone or similar compound as acceptor; GO:0016656 monodehydroascorbate reductase (NADH) activity;	PF07992	Pyridine nucleotide-disulphide oxidoreductase	C	KOG1336	Monodehydroascorbate/ferredoxin reductase
A0A1U8E5A6	60S ribosome subunit biogenesis protein NIP7 homolog OS=Capsicum annuum OX=4072 GN=T459_22278 PE=3 SV=1	T459_22278	1.318	0.00553179	Up	20.9	1.081	1.008	1.039	0.998	0.914	0.964	1.209	1.168	1.043	0.861	0.902	0.831							cytoplasm	K07565	NIP7; 60S ribosome subunit biogenesis protein NIP7		GO:0022613 ribonucleoprotein complex biogenesis; GO:0042254 ribosome biogenesis; GO:0042273 ribosomal large subunit biogenesis; GO:0044085 cellular component biogenesis; GO:0071840 cellular component organization or biogenesis;	GO:0005622 intracellular; GO:0005623 cell; GO:0005634 nucleus; GO:0005730 nucleolus; GO:0030684 preribosome; GO:0030687 preribosome, large subunit precursor; GO:0031974 membrane-enclosed lumen; GO:0031981 nuclear lumen; GO:0032991 protein-containing complex; GO:0043226 organelle; GO:0043227 membrane-bounded organelle; GO:0043228 non-membrane-bounded organelle; GO:0043229 intracellular organelle; …		PF03657	Uncharacterised protein family (UPF0113)	J	KOG3492	Ribosome biogenesis protein NIP7
A0A2G2XYN9	Flavin-containing monooxygenase OS=Capsicum annuum OX=4072 GN=T459_33553 PE=3 SV=1	T459_33553	1.527	9.59949e-05	Up	59.9	1.195	1.219	1.153	0.797	0.799	0.842	1.207	1.267	1.16	0.78	0.802	0.798							nucleus	K00485	FMO; dimethylaniline monooxygenase (N-oxide forming) [EC:1.14.13.8]		GO:0001666 response to hypoxia; GO:0002218 activation of innate immune response; GO:0002253 activation of immune response; GO:0002376 immune system process; GO:0002682 regulation of immune system process; GO:0002684 positive regulation of immune system process; GO:0006950 response to stress; GO:0006952 defense response; GO:0006955 immune response; GO:0007154 cell communication; GO:0007165 signal …		GO:0003824 catalytic activity; GO:0004497 monooxygenase activity; GO:0016491 oxidoreductase activity;			Q	KOG1399	Flavin-containing monooxygenase
A0A2G3ADB9	Cellulose synthase-like protein G2 OS=Capsicum annuum OX=4072 GN=T459_00099 PE=3 SV=1	T459_00099	1.477	0.00655002	Up	76.4	1.076	1.06	1.068	0.966	0.898	0.966	1.122	1.23	1.233	0.718	0.797	0.912	1.131	1.309	1.194	0.714	0.82	0.848	mitochondria				GO:0000271 polysaccharide biosynthetic process; GO:0000278 mitotic cell cycle; GO:0000281 mitotic cytokinesis; GO:0000910 cytokinesis; GO:0005975 carbohydrate metabolic process; GO:0005976 polysaccharide metabolic process; GO:0006073 cellular glucan metabolic process; GO:0007049 cell cycle; GO:0008152 metabolic process; GO:0009058 biosynthetic process; GO:0009059 macromolecule biosynthetic proces…	GO:0005622 intracellular; GO:0005623 cell; GO:0005737 cytoplasm; GO:0005794 Golgi apparatus; GO:0005886 plasma membrane; GO:0012505 endomembrane system; GO:0016020 membrane; GO:0043226 organelle; GO:0043227 membrane-bounded organelle; GO:0043229 intracellular organelle; GO:0043231 intracellular membrane-bounded organelle; GO:0071944 cell periphery;	GO:0003824 catalytic activity; GO:0016740 transferase activity; GO:0016757 transferase activity, transferring glycosyl groups; GO:0016758 transferase activity, transferring hexosyl groups; GO:0016759 cellulose synthase activity; GO:0046527 glucosyltransferase activity;
A0A1U8DZ67	3-oxoacyl-[acyl-carrier-protein] synthase I, chloroplastic OS=Capsicum annuum OX=4072 GN=T459_24406 PE=3 SV=1	T459_24406	0.755	0.00013514	Down	56.3	0.946	0.917	0.941	1.098	1.002	1.11	0.892	0.85	0.846	1.153	1.156	1.121	0.818	0.838	0.75	1.178	1.214	1.187	extracellular	K09458	fabF, OXSM, CEM1; 3-oxoacyl-[acyl-carrier-protein] synthase II [EC:2.3.1.179]	map00061 Fatty acid biosynthesis; map00780 Biotin metabolism; map01100 Metabolic pathways; map01212 Fatty acid metabolism	GO:0000003 reproduction; GO:0003006 developmental process involved in reproduction; GO:0006082 organic acid metabolic process; GO:0006629 lipid metabolic process; GO:0006631 fatty acid metabolic process; GO:0006633 fatty acid biosynthetic process; GO:0006636 unsaturated fatty acid biosynthetic process; GO:0006950 response to stress; GO:0007275 multicellular organism development; GO:0008152 metabo…	GO:0005622 intracellular; GO:0005623 cell; GO:0005737 cytoplasm; GO:0009507 chloroplast; GO:0009532 plastid stroma; GO:0009536 plastid; GO:0009570 chloroplast stroma; GO:0043226 organelle; GO:0043227 membrane-bounded organelle; GO:0043229 intracellular organelle; GO:0043231 intracellular membrane-bounded organelle;	GO:0003824 catalytic activity; GO:0004312 fatty acid synthase activity; GO:0004315 3-oxoacyl-[acyl-carrier-protein] synthase activity; GO:0016740 transferase activity; GO:0016746 transferase activity, transferring acyl groups; GO:0016747 transferase activity, transferring acyl groups other than amino-acyl groups;	PF00109; PF02801	Beta-ketoacyl synthase, N-terminal domain; Beta-ketoacyl synthase, C-terminal domain	IQ	KOG1394	3-oxoacyl-(acyl-carrier-protein) synthase (I and II)
A0A2G2Y552	Putative 1-deoxy-D-xylulose-5-phosphate synthase 2, chloroplastic OS=Capsicum annuum OX=4072 GN=T459_29300 PE=3 SV=1	T459_29300	1.4	1.35409e-05	Up	76.9	1.109	1.151	1.088	0.888	0.89	0.874	1.151	1.173	1.182	0.828	0.824	0.852	1.112	1.096	1.096	0.871	0.879	0.849	chloroplast	K01662	dxs; 1-deoxy-D-xylulose-5-phosphate synthase [EC:2.2.1.7]	map00730 Thiamine metabolism; map00900 Terpenoid backbone biosynthesis; map01100 Metabolic pathways; map01110 Biosynthesis of secondary metabolites				PF02779; PF02780	Transketolase, pyrimidine binding domain; Transketolase, C-terminal domain	G	KOG0523	Transketolase
A0A2G2ZVW0	nucleosome assembly protein 14 isoform X2(predicted) OS=Capsicum annuum OX=4072 GN=T459_08211 PE=3 SV=1	T459_08211	1.437	0.00793532	Up	46.6	0.938	0.914	0.992	1.054	1.054	1.046	1.301	1.136	1.11	0.892	0.74	0.836	1.328	1.276	1.244	0.701	0.697	0.778	chloroplast	K11279	NAP1L1, NRP; nucleosome assembly protein 1-like 1		GO:0000724 double-strand break repair via homologous recombination; GO:0000725 recombinational repair; GO:0006139 nucleobase-containing compound metabolic process; GO:0006259 DNA metabolic process; GO:0006281 DNA repair; GO:0006302 double-strand break repair; GO:0006310 DNA recombination; GO:0006725 cellular aromatic compound metabolic process; GO:0006807 nitrogen compound metabolic process; GO:0…	GO:0005622 intracellular; GO:0005623 cell; GO:0005634 nucleus; GO:0005737 cytoplasm; GO:0043226 organelle; GO:0043227 membrane-bounded organelle; GO:0043229 intracellular organelle; GO:0043231 intracellular membrane-bounded organelle;	GO:0003682 chromatin binding; GO:0005488 binding; GO:0005515 protein binding; GO:0042393 histone binding;			BD	KOG1507	Nucleosome assembly protein NAP-1
A0A1U8HGC8	Type III polyketide synthase A OS=Capsicum annuum OX=4072 GN=T459_32090 PE=3 SV=1	T459_32090	1.388	9.94888e-05	Up	43	0.743	0.738	0.744	1.277	1.256	1.254	1.207	1.196	1.133	0.861	0.84	0.847							nucleus				GO:0006725 cellular aromatic compound metabolic process; GO:0007275 multicellular organism development; GO:0008152 metabolic process; GO:0009058 biosynthetic process; GO:0009555 pollen development; GO:0009653 anatomical structure morphogenesis; GO:0009987 cellular process; GO:0010208 pollen wall assembly; GO:0010584 pollen exine formation; GO:0010927 cellular component assembly involved in morpho…	GO:0005622 intracellular; GO:0005623 cell; GO:0005737 cytoplasm; GO:0005783 endoplasmic reticulum; GO:0012505 endomembrane system; GO:0043226 organelle; GO:0043227 membrane-bounded organelle; GO:0043229 intracellular organelle; GO:0043231 intracellular membrane-bounded organelle;	GO:0003824 catalytic activity; GO:0016740 transferase activity; GO:0016746 transferase activity, transferring acyl groups; GO:0016747 transferase activity, transferring acyl groups other than amino-acyl groups; GO:0090439 tetraketide alpha-pyrone synthase activity;	PF00195; PF02797	Chalcone and stilbene synthases, N-terminal domain; Chalcone and stilbene synthases, C-terminal domain
A0A1U8G5E6	zf-C2HC5 domain-containing protein OS=Capsicum annuum OX=4072 GN=T459_10472 PE=4 SV=1	T459_10472	0.766	0.0022534	Down	47.7	0.954	0.949	0.916	1.011	1.001	1.01	0.804	0.884	0.914	1.128	1.143	1.128							nucleus	K23398	TRIP4; activating signal cointegrator 1		GO:0006355 regulation of transcription, DNA-templated; GO:0006810 transport; GO:0007154 cell communication; GO:0007165 signal transduction; GO:0009719 response to endogenous stimulus; GO:0009725 response to hormone; GO:0009755 hormone-mediated signaling pathway; GO:0009889 regulation of biosynthetic process; GO:0009891 positive regulation of biosynthetic process; GO:0009893 positive regulation of…	GO:0005622 intracellular; GO:0005623 cell; GO:0005634 nucleus; GO:0005654 nucleoplasm; GO:0005737 cytoplasm; GO:0016604 nuclear body; GO:0031594 neuromuscular junction; GO:0031974 membrane-enclosed lumen; GO:0031981 nuclear lumen; GO:0032991 protein-containing complex; GO:0043226 organelle; GO:0043227 membrane-bounded organelle; GO:0043229 intracellular organelle; GO:0043231 intracellular membran…	GO:0002020 protease binding; GO:0003712 transcription coregulator activity; GO:0003713 transcription coactivator activity; GO:0005102 signaling receptor binding; GO:0005488 binding; GO:0005515 protein binding; GO:0008134 transcription factor binding; GO:0016922 nuclear receptor binding; GO:0019899 enzyme binding; GO:0019900 kinase binding; GO:0019901 protein kinase binding; GO:0030331 estrogen re…	PF06221	Putative zinc finger motif, C2HC5-type	K	KOG2845	Activating signal cointegrator 1
A0A2G2ZVA5	pentatricopeptide repeat-containing protein At1g71490-like(predicted) OS=Capsicum annuum OX=4072 GN=T459_07997 PE=4 SV=1	T459_07997	1.361	0.00205854	Up	101	1.298	1.309	1.317	0.688	0.715	0.676	1.181	1.18	1.105	0.845	0.906	0.796	1.035	0.994	1.015	0.95	0.988	1.026	cytoplasm				GO:0006139 nucleobase-containing compound metabolic process; GO:0006725 cellular aromatic compound metabolic process; GO:0006807 nitrogen compound metabolic process; GO:0008152 metabolic process; GO:0009451 RNA modification; GO:0009987 cellular process; GO:0016070 RNA metabolic process; GO:0034641 cellular nitrogen compound metabolic process; GO:0043170 macromolecule metabolic process; GO:0043412…	GO:0005622 intracellular; GO:0005623 cell; GO:0043226 organelle; GO:0043227 membrane-bounded organelle; GO:0043229 intracellular organelle; GO:0043231 intracellular membrane-bounded organelle;	GO:0003676 nucleic acid binding; GO:0003723 RNA binding; GO:0003824 catalytic activity; GO:0004518 nuclease activity; GO:0004519 endonuclease activity; GO:0005488 binding; GO:0016787 hydrolase activity; GO:0016788 hydrolase activity, acting on ester bonds; GO:0097159 organic cyclic compound binding; GO:1901363 heterocyclic compound binding;			S	KOG4197	FOG: PPR repeat
A0A2G3ALV8	EF-hand domain-containing protein OS=Capsicum annuum OX=4072 GN=T459_03103 PE=4 SV=1	T459_03103	0.681	0.000330325	Down	18.5	0.962	0.997	0.896	1.043	1.044	1.009	0.839	0.826	0.764	1.152	1.193	1.221	0.569	0.618	0.65	1.346	1.38	1.432	cytoplasm
A0A1U8EMK5	Non-specific serine/threonine protein kinase OS=Capsicum annuum OX=4072 GN=T459_27969 PE=3 SV=1	T459_27969	0.756	0.000656381	Down	50.1	1.114	1.002	1.184	0.836	0.932	0.934	0.846	0.848	0.891	1.149	1.09	1.182	0.771	0.873	0.825	1.235	1.144	1.155	chloroplast	K07198	PRKAA, AMPK; 5'-AMP-activated protein kinase, catalytic alpha subunit [EC:2.7.11.11]		GO:0006464 cellular protein modification process; GO:0006468 protein phosphorylation; GO:0006793 phosphorus metabolic process; GO:0006796 phosphate-containing compound metabolic process; GO:0006807 nitrogen compound metabolic process; GO:0007154 cell communication; GO:0007165 signal transduction; GO:0008152 metabolic process; GO:0009987 cellular process; GO:0016310 phosphorylation; GO:0019538 pro…	GO:0005622 intracellular; GO:0005623 cell; GO:0005634 nucleus; GO:0005737 cytoplasm; GO:0005829 cytosol; GO:0043226 organelle; GO:0043227 membrane-bounded organelle; GO:0043229 intracellular organelle; GO:0043231 intracellular membrane-bounded organelle;	GO:0003824 catalytic activity; GO:0004672 protein kinase activity; GO:0004674 protein serine/threonine kinase activity; GO:0016301 kinase activity; GO:0016740 transferase activity; GO:0016772 transferase activity, transferring phosphorus-containing groups; GO:0016773 phosphotransferase activity, alcohol group as acceptor; GO:0140096 catalytic activity, acting on a protein;	PF00069; PF03822	Protein kinase domain; NAF domain	T	KOG0583	Serine/threonine protein kinase
A0A1U8EQR2	Putative DNA-binding family protein-like(predicted) OS=Capsicum annuum OX=4072 GN=T459_27536 PE=4 SV=1	T459_27536	1.359	5.23386e-05	Up	13.9	0.975	1.014	0.96	1.026	1.003	1.011	1.142	1.162	1.187	0.851	0.841	0.877	1.174	1.179	1.187	0.803	0.835	0.83	cytoplasm	K07466	RFA1, RPA1, rpa; replication factor A1	map03030 DNA replication; map03420 Nucleotide excision repair; map03430 Mismatch repair; map03440 Homologous recombination
A0A1U8HGQ0	10 kDa chaperonin OS=Capsicum annuum OX=4072 GN=T459_19637 PE=3 SV=1	T459_19637	1.313	0.0001244	Up	26.3	1.007	1.014	1.006	1.004	1.01	1.008	1.148	1.18	1.121	0.856	0.886	0.884	1.218	1.214	1.216	0.803	0.789	0.782	chloroplast	K04078	groES, HSPE1; chaperonin GroES		GO:0006457 protein folding; GO:0006458 'de novo' protein folding; GO:0006950 response to stress; GO:0006986 response to unfolded protein; GO:0009266 response to temperature stimulus; GO:0009409 response to cold; GO:0009628 response to abiotic stimulus; GO:0009787 regulation of abscisic acid-activated signaling pathway; GO:0009788 negative regulation of abscisic acid-activated signaling pathway; G…	GO:0005576 extracellular region; GO:0005622 intracellular; GO:0005623 cell; GO:0005737 cytoplasm; GO:0005739 mitochondrion; GO:0005759 mitochondrial matrix; GO:0009507 chloroplast; GO:0009526 plastid envelope; GO:0009532 plastid stroma; GO:0009534 chloroplast thylakoid; GO:0009535 chloroplast thylakoid membrane; GO:0009536 plastid; GO:0009570 chloroplast stroma; GO:0009579 thylakoid; GO:0009941 c…	GO:0005488 binding; GO:0005507 copper ion binding; GO:0005515 protein binding; GO:0043167 ion binding; GO:0043169 cation binding; GO:0046872 metal ion binding; GO:0046914 transition metal ion binding; GO:0051082 unfolded protein binding; GO:0051087 chaperone binding;	PF00166	Chaperonin 10 Kd subunit	O	KOG1641	Mitochondrial chaperonin
[truncated: 78 more rows]

## Sheet: BY_SHvsKY_SH
Protein accession	Protein description	Gene name	BY_SH/KY_SH Ratio	BY_SH/KY_SH P value	Regulated Type	MW [kDa]	BY_JS_1	BY_JS_2	BY_JS_3	KY_JS_1	KY_JS_2	KY_JS_3	BY_SF_1	BY_SF_2	BY_SF_3	KY_SF_1	KY_SF_2	KY_SF_3	BY_SH_1	BY_SH_2	BY_SH_3	KY_SH_1	KY_SH_2	KY_SH_3	Subcellular localization	KEGG KO No.	KEGG Gene	KEGG pathway	Biological Process	Cellular Component	Molecular Function	Pfam ID	Domain description	KOG category	KOG NO.	KOG description
[truncated: 1,105 more rows]
